# Supplementary material
Source: publisher figshare collection journal article supplement (https://acs.figshare.com/ndownloader/files/4643344)

## Total Synthesis of the *Strychnos* Alkaloid (+)-Minfiensine: Tandem Enantioselective Intramolecular Heck–Iminium Ion Cyclization

Amy B. Dounay, Philip G. Humphreys, Larry E. Overman,<sup>\*</sup> and Aaron D. Wroblewski

*Department of Chemistry, 1102 Natural Sciences II, University of California,  
Irvine, California 92697–2025, USA*

### Supporting Information – Table of Contents

|                                                     |     |
|-----------------------------------------------------|-----|
| Experimental Procedures.....                        | S1  |
| References.....                                     | S32 |
| <sup>1</sup> H and <sup>13</sup> C NMR Spectra..... | S33 |

For materials and methods, see: Becker, M. H.; Chua, P.; Downham, R.; Douglas, C. J.; Garg, N. K.; Hiebert, S.; Jaroch, S.; Matsuoka, R. T.; Middleton, J. A.; Ng, F. W.; Overman, L. E. *J. Am. Chem. Soc.* **2007**, *129*, 11987–12002.

#### Experimental Procedures.

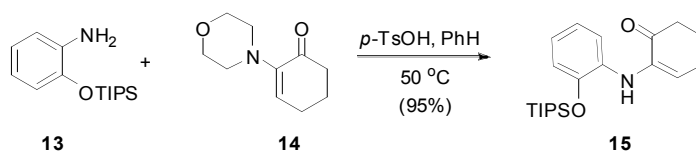

**Enone 15.** A mixture of **13**<sup>1</sup> (19.1 g, 71.4 mmol), enone **14**<sup>2</sup> (15.6 g, 86.1 mmol), benzene (180 mL), and *p*-toluenesulfonic acid mono hydrate (14.9 g, 78.3 mmol) was heated at 50 °C under Ar for 2 h, during which time the solution became homogeneous. The mixture was cooled to rt, diluted with EtOAc (100 mL), and washed with saturated aqueous NaHCO<sub>3</sub> (2 × 100 mL). The separated organic layer was washed with brine (100 mL), dried (Na<sub>2</sub>SO<sub>4</sub>), filtered and concentrated under reduced pressure. Purification of the crude residue by column chromatography (10% EtOAc/hexanes) gave **15** (24.4 g, 67.8 mmol, 95%) as a colorless oil: <sup>1</sup>H NMR (500 MHz, CDCl<sub>3</sub>) δ 7.23 (dd, *J* = 8.0, 1.5

Hz, 1H), 6.99 (s, 1H), 6.89 (ddd,  $J = 15.0, 8.0, 1.5$  Hz, 2H), 6.74 (ddd,  $J = 8.0, 8.0, 1.5$  Hz, 1H), 6.46 (t,  $J = 5.0$  Hz, 1H), 2.58 (t,  $J = 6.0$  Hz, 2H), 2.49 (q,  $J = 6.0$  Hz, 2H), 2.03 (dddd,  $J = 6.0, 6.0, 6.0, 6.0$  Hz, 2H), 1.35 (m, 3H), 1.14 (d,  $J = 7.5$  Hz, 18 H);  $^{13}\text{C}$  NMR (125 MHz,  $\text{CDCl}_3$ )  $\delta$  195.6, 145.5, 136.1, 133.6, 121.2, 120.1, 118.1, 116.6, 116.1, 38.0, 25.0, 23.1, 18.2, 13.2; IR (neat) 3377, 2944, 2867, 1679, 1596, 1522, 1476  $\text{cm}^{-1}$ ; HRMS (CI) calcd for  $\text{C}_{21}\text{H}_{33}\text{NO}_2\text{SiH}$  [ $\text{M} + \text{H}$ ]: 359.2281. Found: 359.2278.

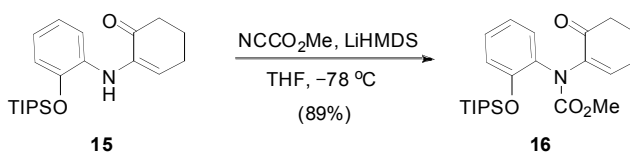

**Carbamate 16.** *n*-BuLi (2.48 M in hexanes, 26.9 mL, 66.7 mmol) was added dropwise over 10 min to a stirring solution of HMDS (13.9 mL, 66.7 mmol) in THF (90 mL) at  $-78\text{ }^\circ\text{C}$  under Ar. Following warming to rt over 30 min, the solution was added dropwise *via* cannula over 1 h to a stirring solution of **15** (8.0 g, 22.3 mmol), methyl cyanofornate (6.90 mL, 89.0 mmol) and THF (70 mL) at  $-78\text{ }^\circ\text{C}$  under Ar. After 15 min, saturated aqueous  $\text{NH}_4\text{Cl}$  (20 mL) was added. The resultant mixture was warmed to rt and diluted with EtOAc (100 mL). The separated aqueous phase was washed with EtOAc ( $3 \times 100$  mL) and the combined organic phase was washed with brine (100 mL), dried ( $\text{Na}_2\text{SO}_4$ ), filtered and concentrated under reduced pressure. Purification of the crude residue by column chromatography (10% to 15% EtOAc/hexanes) gave **16** (8.3 g, 19.9 mmol, 89%) as a cream solid: mp  $110\text{--}112\text{ }^\circ\text{C}$ ;  $^1\text{H}$  NMR (500 MHz,  $\text{C}_6\text{D}_6$ ,  $60\text{ }^\circ\text{C}$ )<sup>3</sup>  $\delta$  7.54 (d,  $J = 7.5$  Hz, 1H), 6.94 (ddd,  $J = 9.0, 9.0, 1.5$  Hz, 1H), 6.85 (m, 2H), 6.74 (ddd,  $J = 8.5, 8.5, 1.0$  Hz, 1H), 3.48 (s, 3H), 2.24 (br s, 2H), 1.75 (br s, 2H), 1.41 (br s, 2H), 1.30 (m, 3H), 1.15 (d,  $J = 7.5$  Hz, 18 H);  $^{13}\text{C}$  NMR (125 MHz,  $\text{C}_6\text{D}_6$ ,  $60\text{ }^\circ\text{C}$ )  $\delta$  193.6, 155.4, 153.1, 143.4, 142.4, 134.8, 130.8, 128.7, 122.0, 119.3, 52.9, 39.0, 25.9, 23.1, 18.6, 13.8; IR (neat) 2946, 2867, 1721, 1692, 1596, 1499, 1439, 1333  $\text{cm}^{-1}$ ; HRMS (CI) calcd for  $\text{C}_{23}\text{H}_{35}\text{NO}_4\text{SiH}$  [ $\text{M} + \text{H}$ ]: 418.2414. Found: 418.2400.

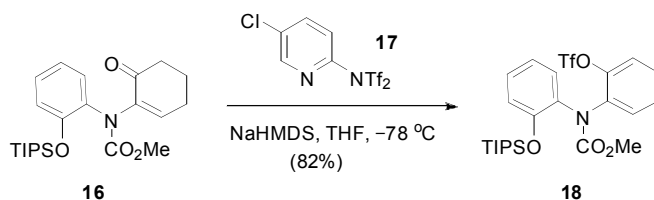

**Triflate 18.** NaHMDS (1.0 M in THF, 48.3 mL, 48.3 mmol) was added dropwise to a solution of **16** (13.5 g, 32.3 mmol), 2-[*N,N*-bis(trifluoromethylsulfonyl)amino]-5-chloropyridine (**17**) (19.0 g, 48.3 mmol), and THF (300 mL) at  $-78\text{ }^{\circ}\text{C}$  under Ar. After 15 min, saturated aqueous  $\text{NaHCO}_3$  (75 mL) was added, the mixture was warmed to rt, and extracted with EtOAc (200 mL). The separated aqueous phase was washed with additional EtOAc (100 mL) and the combined organic phases were washed with brine (150 mL), dried ( $\text{Na}_2\text{SO}_4$ ), filtered and concentrated under reduced pressure. Purification of the crude residue by column chromatography (10% to 20% EtOAc/hexanes) gave **18** (14.5 g, 26.4 mmol, 82%) as a pale yellow solid:  $^1\text{H}$  NMR (500 MHz,  $\text{C}_6\text{D}_6$ ,  $60\text{ }^{\circ}\text{C}$ )  $\delta$  7.50 (d,  $J = 7.5$  Hz, 1H), 6.94 (ddd,  $J = 8.0, 8.0, 1.5$  Hz, 1H), 6.81 (d,  $J = 8.0$  Hz, 1H), 6.74 (t,  $J = 7.5$  Hz, 1H), 5.62 (m, 2H), 3.50 (s, 3H), 1.70 (m, 4H), 1.24 (m, 3H), 1.10 (d,  $J = 7.5$  Hz, 18H);  $^{13}\text{C}$  NMR (125 MHz,  $\text{C}_6\text{D}_6$ ,  $60\text{ }^{\circ}\text{C}$ )  $\delta$  152.9, 143.6, 130.0, 128.7, 128.3, 128.0, 127.7, 121.9, 119.7 (q,  $J_{\text{C,F}} = 319$  Hz), 119.0, 116.4, 53.3, 22.1, 22.0, 18.7, 13.9; IR (neat) 2948, 2869, 1729, 1598, 1499, 1420, 1320  $\text{cm}^{-1}$ ; HRMS (ESI) calcd for  $\text{C}_{24}\text{H}_{34}\text{F}_3\text{NO}_6\text{SSiH}$  [ $\text{M} + \text{H}$ ]: 550.1907. Found: 550.1890.

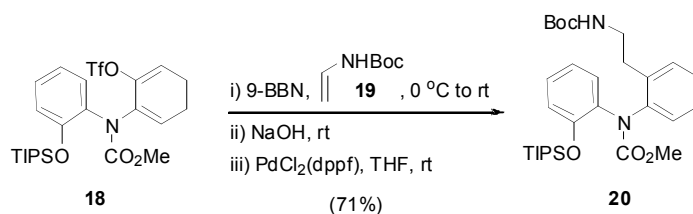

**Biscarbamate 20.** 9-BBN (0.5 M in THF, 32 mL, 16 mmol) was added dropwise over 15 min to a solution of *N*-vinyl-*tert*-butyl carbamate (**19**)<sup>4</sup> (2.1 g, 14.6 mmol) in THF (45 mL) at  $0\text{ }^{\circ}\text{C}$  under Ar. The reaction was allowed to warm to rt over a period of 1 h, then maintained at rt for an additional 15 h. An aqueous solution of NaOH (15 mL of a 3.0 M solution, 45 mmol) was added, and the resulting mixture was degassed by sparging with Ar through a submerged needle for 45 minutes. The mixture was transferred via cannula to a degassed solution of **18** (4.0 g, 7.3 mmol),  $\text{PdCl}_2(\text{dppf})$  (715

mg, 0.87 mmol), and THF (45 mL) at rt. After 40 min, the reaction mixture was cooled to 0 °C, and pH 7 buffer solution (50 mL) was added followed by slow addition of 30% aqueous H<sub>2</sub>O<sub>2</sub> (50 mL). When gas evolution slowed, the mixture was warmed to room temperature. After an additional 30 min at rt, saturated aqueous NH<sub>4</sub>Cl (50 mL) was added, the mixture was extracted with EtOAc (2 × 75 mL), and the combined organic extracts were washed with brine (75 mL), dried (Na<sub>2</sub>SO<sub>4</sub>), filtered, and concentrated under reduced pressure. Purification of the crude residue by column chromatography (10% EtOAc/hexanes) gave **20** (2.8 g, 5.2 mmol, 71%) as a colorless foam: <sup>1</sup>H NMR (500 MHz, C<sub>6</sub>D<sub>6</sub>, 60 °C) δ 7.21(d, *J* = 7.5 Hz, 1H), 6.94 (t, *J* = 8.0 Hz, 1H), 6.85 (d, *J* = 8.0 Hz, 1H), 6.76 (t, *J* = 7.5 Hz, 1H), 5.78 (s, 1H), 5.56 (s, 1H), 3.51 (s, 3H), 3.36 (s, 2H), 2.41 (s, 2H), 1.85 (s, 4H), 1.45 (s, 9H), 1.28 (m, 3H), 1.14 (d, *J* = 7.0 Hz, 18H); <sup>13</sup>C NMR (125 MHz, C<sub>6</sub>D<sub>6</sub>, 60 °C) δ 156.3, 152.8, 134.4, 129.2, 128.9, 128.7, 128.5, 128.3, 125.0, 122.8, 121.7, 119.2, 78.8, 52.9, 40.8, 31.7, 29.0, 23.1, 22.7, 18.7, 13.9; IR (neat) 3363, 2946, 2869, 1715, 1499, 1441, 1335 cm<sup>-1</sup>; HRMS (CI) calcd for C<sub>30</sub>H<sub>48</sub>N<sub>2</sub>O<sub>5</sub>Si: 544.3333. Found: 544.3326.

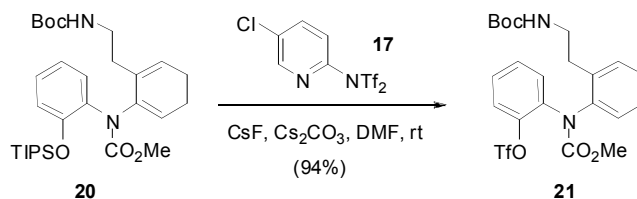

**Triflate 21.** CsF (13.8 g, 90.8 mmol) was added to a stirring solution of **20** (9.9 g, 18.2 mmol) and 2-[*N,N*-bis(trifluoromethylsulfonyl)amino]-5-chloropyridine (**17**) (14.3 g, 36.2 mmol) in anhydrous DMF (150 mL) under Ar.<sup>5</sup> Following stirring for 3 min, crushed cesium carbonate (24.0 g, 73.6 mmol) was added and the resultant suspension was stirred vigorously for 15 min. Saturated aqueous NH<sub>4</sub>Cl (100 mL) was added, the mixture was diluted with Et<sub>2</sub>O (100 mL), and the separated aqueous phase was extracted with Et<sub>2</sub>O (3 × 100 mL). The combined organic extracts were washed with brine (3 × 100 mL), dried (Na<sub>2</sub>SO<sub>4</sub>), filtered and concentrated under reduced pressure. Purification of the crude residue by column chromatography (15% to 25% EtOAc/hexanes) gave **18** (8.90 g, 17.1 mmol, 94%) as a colorless foam: <sup>1</sup>H NMR (500 MHz, C<sub>6</sub>D<sub>6</sub>, 60 °C) δ 7.18–7.13 (m, 2H), 6.84 (ddd, *J* = 7.5, 7.5, 1.5 Hz, 1H), 6.70 (ddd, *J* = 8.5, 8.5, 1.5 Hz, 1H),



5.76 (t,  $J = 4.5$  Hz, 1H), 5.54 (m, 1H), 4.42 (s, 1H), 3.54 (s, 3H), 3.28 (q,  $J = 6.5$  Hz, 2H), 2.27 (t,  $J = 7.0$  Hz, 2H), 1.83 (m, 4H), 1.45 (s, 9H);  $^{13}\text{C}$  NMR (125 MHz,  $\text{C}_6\text{D}_6$ , 60 °C)  $\delta$  156.3, 155.1, 145.7, 140.3, 136.3, 133.6, 129.0, 128.9, 128.0, 126.0, 125.9, 122.2, 119.6 (q,  $J_{\text{C,F}} = 318$  Hz), 78.9, 53.6, 40.6, 31.8, 28.9, 23.1, 22.5; IR (neat) 3436, 3363, 3037, 2977, 1713, 1675, 1493, 1422, 1329  $\text{cm}^{-1}$ ; HRMS (CI) calcd for  $\text{C}_{22}\text{H}_{27}\text{F}_3\text{N}_2\text{O}_7\text{Si}$ : 520.1491. Found: 520.1483.

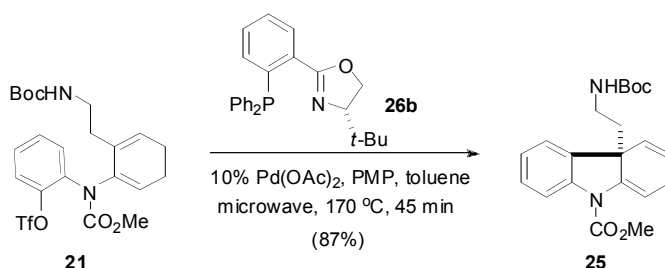

**Dihydrocarbazole 25.** Toluene was sparged with Ar for 30 min prior to use in this reaction. A microwave reaction tube containing  $\text{Pd}(\text{OAc})_2$  (5 mg, 23  $\mu\text{mol}$ ) and (*S*)-4-*tert*-butyl-2-[2-(diphenylphosphinyl)phenyl]-4,5-dihydrooxazole (**26b**)<sup>6</sup> (27 mg, 69  $\mu\text{mol}$ ) under Ar was charged with a solution of **21** (120 mg, 0.23 mmol), toluene (1.5 mL), and 1,2,2,6,6-pentamethylpiperidine (170  $\mu\text{L}$ , 0.92 mmol). After stirring at rt for 10 min, the reaction mixture was microwave-heated (CEM Discover System, 60 Hz and 300 W instrument) at 170 °C for 45 min. Following cooling, the reaction mixture was concentrated under reduced pressure. Purification of the crude residue by column chromatography (10% to 20% EtOAc/hexanes) gave **25** (74 mg, 0.20 mmol, 87%) as a colorless foam:  $[\alpha]_{589} +94.1$ ,  $[\alpha]_{577} +98.9$ ,  $[\alpha]_{546} +114$ ,  $[\alpha]_{435} +229$  (*c* 3.7,  $\text{CHCl}_3$ );  $^1\text{H}$  NMR (500 MHz,  $\text{C}_6\text{D}_6$ , 60 °C)  $\delta$  8.00 (d,  $J = 8.0$  Hz, 1H), 7.08 (ddd,  $J = 8.0, 8.0, 1.5$  Hz, 1H), 6.98 (d,  $J = 7.5$  Hz, 1H), 6.89 (t,  $J = 7.5$  Hz, 1H), 6.15 (d,  $J = 5.5$  Hz, 1H), 6.00 (dd,  $J = 9.5, 3.0$  Hz, 1H), 5.71 (dd,  $J = 9.0, 4.5$  Hz, 1H), 3.90 (br s, 1H), 3.52 (s, 3H), 2.95 (m, 2H), 2.61 (dddd,  $J = 22.0, 2.0, 2.0, 2.0$  Hz, 1H), 2.48 (ddd,  $J = 22.0, 5.5, 5.5$  Hz, 1H), 1.50 (t,  $J = 7.5$  Hz, 2H), 1.39 (s, 9H);  $^{13}\text{C}$  NMR (125 MHz,  $\text{C}_6\text{D}_6$ , 60 °C)  $\delta$  155.9, 153.5, 143.9, 141.8, 135.9, 129.8, 128.9, 127.3, 124.0, 122.4, 116.5, 108.1, 78.8, 52.7, 47.4, 44.2, 37.4, 28.9, 27.6; IR (neat) 3375, 2974, 1715, 1514, 1475  $\text{cm}^{-1}$ ; HRMS (CI) calcd for  $\text{C}_{21}\text{H}_{26}\text{N}_2\text{O}_4$ : 370.1893. Found: 370.1886.

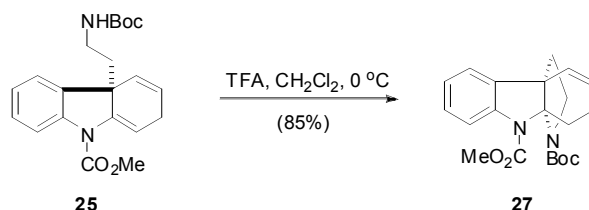

**Iminoethanocarbazole 27.** Trifluoroacetic acid (0.16 mL, 2.1 mmol) was added to a stirring solution of **25** (260 mg, 0.70 mmol) and CH<sub>2</sub>Cl<sub>2</sub> (8 mL) at 0 °C under Ar. After 30 min, saturated aqueous NaHCO<sub>3</sub> (10 mL) was added. The separated aqueous phase was washed with CH<sub>2</sub>Cl<sub>2</sub> (15 mL), and the combined organic fractions were washed with brine (15 mL), dried (Na<sub>2</sub>SO<sub>4</sub>), filtered and concentrated under reduced pressure. Purification of the crude residue by column chromatography (10% to 20% EtOAc/hexanes) gave **27** (220 mg, 0.59 mmol, 85%) as a colorless foam:  $[\alpha]_{589} -41.8$ ,  $[\alpha]_{577} -44.1$ ,  $[\alpha]_{546} -49.8$ ,  $[\alpha]_{435} -86.6$ ,  $[\alpha]_{405} -110$  (*c* 1.0, CHCl<sub>3</sub>); <sup>1</sup>H NMR (500 MHz, C<sub>6</sub>D<sub>6</sub>, 60 °C)  $\delta$  8.13 (d, *J* = 8.0 Hz, 1H), 7.09 (ddd, *J* = 7.5, 7.5, 1.5 Hz, 1H), 6.90 (dd, *J* = 7.5, 1.5 Hz, 1H), 6.86 (ddd, *J* = 7.5, 7.5, 1.0 Hz, 1H), 5.54 (ddd, *J* = 10.0, 4.0, 4.0 Hz, 1H), 5.47 (ddd, *J* = 10.0, 2.0, 2.0 Hz, 1H), 3.65 (s, 3H), 3.47 (m, 1H), 3.11 (ddd, *J* = 10.5, 9.0, 7.5 Hz, 1H), 3.03 (ddd, *J* = 13.5, 5.5, 5.5 Hz, 1H), 2.40 (ddd, *J* = 13.5, 8.0, 5.0 Hz, 1H), 2.11 (m, 1H), 2.02 (m, 1H), 1.85 (ddd, *J* = 12.5, 7.5, 3.5 Hz, 1H), 1.67 (ddd, *J* = 12.5, 8.5, 8.5 Hz, 1H), 1.43 (s, 9H); <sup>13</sup>C NMR (125 MHz, C<sub>6</sub>D<sub>6</sub>, 60 °C)  $\delta$  155.1, 153.8, 142.6, 135.3, 128.9, 128.7, 127.1, 123.6, 122.6, 117.8, 99.4, 79.7, 57.0, 52.3, 47.1, 35.5, 29.0, 28.8, 23.5; IR (neat) 2975, 1706, 1480, 1439, 1378 cm<sup>-1</sup>; HRMS (CI) calcd for C<sub>21</sub>H<sub>26</sub>N<sub>2</sub>O<sub>4</sub>: 370.1893. Found: 370.1895. HPLC (Daicel Chiracel OD-H column, column temperature 23 °C, *n*-hexane/*i*-propanol = 98:2, flow rate 1.0 mL·min<sup>-1</sup>): 6.7 min (minor enantiomer), 14.1 min (major enantiomer), 99% ee. See page S47 for chiral HPLC traces

**Generation of 27 by a Cascade Sequence:** A solution of triflate **21** (96 mg, 0.19 mmol) and toluene (1.2 mL) in a 10 mL microwave reaction vessel was sparged with Ar for 10 min. To this solution was added Pd(OAc)<sub>2</sub> (6.4 mg, 0.028 mmol), (*S*)-4-*tert*-butyl-2-[2-(diphenylphosphinyl)phenyl]-4,5-dihydrooxazole (**26b**)<sup>6</sup> (33 mg, 0.084 mmol), and 1,2,2,6,6-pentamethylpiperidine (105  $\mu$ L, 0.57 mmol). The reaction was then degassed for an additional 20 min. This solution was subsequently heated with stirring in a

microwave reactor (CEM Discover System, 60 Hz and 300 W instrument) at 170 °C for 30 min. The reaction was then cooled to 0 °C, and to it was added a 0 °C solution of trifluoroacetic acid (0.17 ml, 2.28 mmol) in CH<sub>2</sub>Cl<sub>2</sub> (2 ml). After stirring for 15 min at this temperature, the reaction was poured into saturated aqueous NaHCO<sub>3</sub>. The isolated organic layer was dried (Na<sub>2</sub>SO<sub>4</sub>), filtered and concentrated under reduced pressure. Purification of the crude residue by column chromatography (15% EtOAc/hexanes) gave tetracycle **27** (51 mg, 0.14 mmol, 75%) as a colorless oil:  $[\alpha]_{589} -41.8$ .

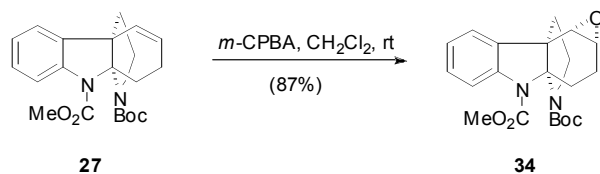

**Epoxide 34.** *m*-chloroperoxybenzoic acid (400 mg of 70% purity reagent, 1.6 mmol) was added to a stirring solution of **27** (240 mg, 0.65 mmol) in CH<sub>2</sub>Cl<sub>2</sub> (7 mL) at 0 °C and the reaction mixture was slowly warmed to rt over 30 min. After 2 h, the reaction was cooled to 0 °C, and another portion of *m*-chloroperoxybenzoic acid (400 mg of 70% purity reagent, 1.6 mmol) was added. The reaction mixture was allowed to warm to rt over 30 min. After 2.5 h, the reaction was diluted with H<sub>2</sub>O (10 mL) and Et<sub>2</sub>O (20 mL). The separated organic phase was washed with 1 M NaOH (3 × 10 mL) and brine (10 mL), dried (Na<sub>2</sub>SO<sub>4</sub>), filtered and concentrated under reduced pressure. Purification of the crude residue by column chromatography (10% to 20% EtOAc/hexanes) gave **34** (217 mg, 0.56 mmol, 87%) as a colorless crystalline solid: mp 178–180 °C;  $[\alpha]_{589} -79.3$ ,  $[\alpha]_{577} -82.8$ ,  $[\alpha]_{546} -94.6$ ,  $[\alpha]_{435} -166$ ,  $[\alpha]_{405} -209$  (*c* 2.1, CHCl<sub>3</sub>); <sup>1</sup>H NMR (500 MHz, C<sub>6</sub>D<sub>6</sub>, 60 °C) δ 8.14 (d, *J* = 8.0 Hz, 1H), 7.08 (m, 1H), 6.86 (m, 2H), 3.70 (s, 3H), 3.54 (ddd, *J* = 14.0, 3.5, 3.5 Hz, 1H), 3.36 (t, *J* = 9.0 Hz, 1H), 2.85 (ddd, *J* = 12.0, 9.5, 6.5 Hz, 1H), 2.80 (d, *J* = 3.5 Hz, 1H), 2.78 (m, 1H), 2.33 (ddd, *J* = 12.0, 12.0, 8.5 Hz, 1H), 1.90–1.83 (m, 3H), 1.73 (ddd, *J* = 13.5, 11.0, 5.5 Hz, 1H), 1.34 (s, 9H); <sup>13</sup>C NMR (125 MHz, C<sub>6</sub>D<sub>6</sub>, 60 °C) δ 155.6, 153.6, 145.1, 132.2, 129.8, 128.9, 123.8, 123.3, 117.8, 86.9, 79.9, 56.5, 55.2, 53.5, 52.5, 45.8, 30.2, 28.9, 24.6, 22.5; IR (neat) 2977, 1702, 1602, 1478, 1437, 1382, 1358 cm<sup>-1</sup>; HRMS (CI) calcd for C<sub>21</sub>H<sub>26</sub>N<sub>2</sub>O<sub>5</sub>: 386.1842. Found: 386.1842.

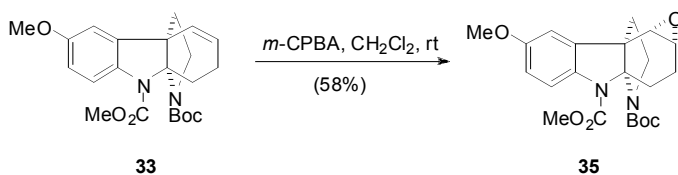

**Epoxide 35.** *m*-chloroperoxybenzoic acid (215 mg of 70% purity reagent, 0.88 mmol) was added to a stirred solution of racemic **33** (140 mg, 0.35 mmol) in CH<sub>2</sub>Cl<sub>2</sub> (4 mL) at 0 °C, and the reaction mixture was allowed to warm to rt. After 1 h at rt, the reaction was re-cooled to 0 °C, and another portion of *m*-chloroperoxybenzoic acid (140 mg of 70% purity reagent, 0.88 mmol) was added. The reaction mixture was allowed to warm to rt and the reaction was stirred for 1 h at rt. The reaction was then diluted with H<sub>2</sub>O (10 mL) and Et<sub>2</sub>O (20 mL). The separated organic phase was washed with 1 M NaOH (3 × 10 mL) and brine (10 mL), dried (Na<sub>2</sub>SO<sub>4</sub>), filtered and concentrated under reduced pressure. Purification of the crude residue by column chromatography (10% to 20% EtOAc/hexanes) gave **35** (85 mg, 0.14 mmol, 58%) as a colorless crystalline solid<sup>7</sup>: mp 185–187 °C; <sup>1</sup>H NMR (500 MHz, C<sub>6</sub>D<sub>6</sub>, 60 °C) δ 8.08 (d, *J* = 8.8 Hz, 1H), 6.65–6.63 (m, 2H), 3.71 (s, 3H), 3.55 (dt, *J* = 13.9, 3.2 Hz, 1H), 3.36 (br s, 4H), 2.91–2.85 (m, 1H), 2.80–2.78 (m, 2H), 2.33–2.26 (m, 1H), 1.92–1.82 (m, 2H), 1.72 (ddd, *J* = 16.8, 11.9, 4.9 Hz, 1H), 1.36 (s, 9H); <sup>13</sup>C NMR (125 MHz, C<sub>6</sub>D<sub>6</sub>, 60 °C) δ 157.5, 155.1, 153.8, 138.8, 133.9, 118.9, 114.5, 110.3, 87.2, 80.1, 56.6, 55.9, 55.5, 53.7, 52.6, 45.9, 30.3, 29.1, 24.8, 22.8; IR (neat) 2949, 1698, 1486, 1436, 1382, 1359 cm<sup>-1</sup>; HRMS (ESI) calcd for C<sub>22</sub>H<sub>28</sub>N<sub>2</sub>O<sub>6</sub>Na: 439.1845. Found: 439.1849.

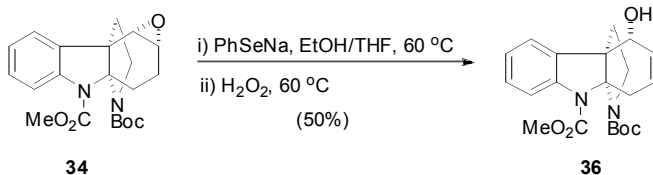

**Allylic Alcohol 36.** Following a general procedure,<sup>8</sup> a bulk solution of NaSePh was prepared by addition of two portions of NaBH<sub>4</sub> (12 mg, 0.32 mmol each) to a stirring yellow suspension of Ph<sub>2</sub>Se<sub>2</sub> (50 mg, 0.16 mmol) in absolute ethanol (1.5 mL, degassed by sparging with Ar for 30 min prior to use) at 0 °C. The reaction mixture was warmed to rt over 20 min and maintained at rt for 20 min until the solution became colorless, indicating complete reduction of Ph<sub>2</sub>Se<sub>2</sub>. A solution of **34** (22 mg, 57 μmol) and THF

(0.5 mL, degassed by sparging with Ar for 30 min prior to use) under Ar at rt was charged with a portion of the bulk NaSePh solution (0.5 mL, 50 mmol). The reaction mixture was heated to 60 °C and maintained at this temperature for 2 h. An additional portion of NaSePh solution (0.25 mL, 25 mmol) was added. Two additional portions of NaBH<sub>4</sub> (5 mg each) were added at 2 h intervals over the next 4 h to maintain a colorless reaction mixture and reduce any Ph<sub>2</sub>Se<sub>2</sub> that formed during the course of the reaction. The reaction mixture was cooled to 0 °C, and 30% H<sub>2</sub>O<sub>2</sub> (0.5 mL) was added dropwise. After 20 min, the reaction mixture was warmed to rt and maintained at this temperature for ca. 30 min, until gas evolution ceased. TLC analysis showed complete consumption of the alkylselenide intermediate. The reaction mixture was heated at 60 °C for 1.5 h. The reaction mixture was cooled to rt and diluted with H<sub>2</sub>O (1 mL) and Et<sub>2</sub>O (3 mL). The separated aqueous layer was extracted with Et<sub>2</sub>O (3 × 3 mL). The combined organic fractions were washed with saturated aqueous NaHCO<sub>3</sub> (3 × 3 mL), brine (5 mL), dried (Na<sub>2</sub>SO<sub>4</sub>), filtered and concentrated under reduced pressure. Purification of the crude residue by column chromatography (10% to 20% EtOAc/hexanes) gave **36** (11 mg, 28 mmol, 50%) as a colorless foam. **Note:** See preparation of **44** for an improved procedure.  $[\alpha]_{589} -98.6$ ,  $[\alpha]_{577} -104$ ,  $[\alpha]_{546} -118$ ,  $[\alpha]_{435} -206$ ,  $[\alpha]_{405} -259$  (*c* 1.1, CHCl<sub>3</sub>); <sup>1</sup>H NMR (500 MHz, C<sub>6</sub>D<sub>6</sub>, 60 °C) δ 8.22 (d, *J* = 8.0 Hz, 1H), 7.35 (d, *J* = 7.0 Hz, 1H), 7.14 (dd, *J* = 8.0, 7.5 Hz, 1H), 6.90 (t, *J* = 7.5 Hz, 1H), 5.82 (m, 1H), 5.59 (ddd, *J* = 9.5, 2.5, 2.5 Hz, 1H), 4.28 (dd, *J* = 15.0, 6.5 Hz, 1H), 3.99 (s, 1H), 3.75 (dd, *J* = 11.5, 7.5 Hz, 1H), 3.63 (s, 3H), 2.83 (ddd, *J* = 11.5, 11.5, 4.5 Hz, 1H), 2.37 (m, 1H), 1.95 (ddd, *J* = 12.0, 12.0, 7.5 Hz, 1H), 1.70 (dd, *J* = 12.0, 5.0 Hz, 1H), 1.42 (s, 9H); <sup>13</sup>C NMR (125 MHz, C<sub>6</sub>D<sub>6</sub>, 60 °C) δ 153.8, 152.4, 143.6, 134.6, 133.7, 128.8, 126.6, 124.1, 123.4, 115.7, 91.1, 79.3, 73.2, 64.5, 51.9, 46.2, 34.3, 31.3, 28.5; IR (neat) 3464, 2977, 2854, 1711, 1690, 1484, 1389 cm<sup>-1</sup>; HRMS (ESI) calcd for C<sub>21</sub>H<sub>26</sub>N<sub>2</sub>O<sub>5</sub>Na [M + Na]: 409.1740. Found: 409.1736.

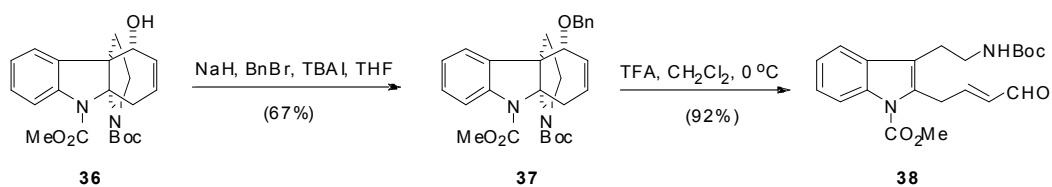

**Indole 38:** NaH (60% dispersion in mineral oil, 8 mg, 0.22 mmol) was added to a stirring solution of alcohol **36** (17 mg, 0.044 mmol) and THF (0.5 mL) at 0 °C under Ar. The reaction was allowed to warm to rt over 10 min and then re-cooled to 0 °C. To this was added benzyl bromide (13  $\mu$ L, 0.11 mmol) and tetrabutylammonium iodide (6 mg, 0.016 mmol), and the reaction was warmed to rt and stirred for 3 h. The reaction was quenched with saturated aqueous  $\text{NH}_4\text{Cl}$  and extracted with EtOAc. The combined organic extract was washed with brine, dried ( $\text{Na}_2\text{SO}_4$ ), filtered and concentrated under reduced pressure. Purification of the crude residue by column chromatography (15% hexanes/Et<sub>2</sub>O) gave **37** (14 mg, 0.030 mmol, 67%) as a clear, colorless oil: <sup>1</sup>H NMR (500 MHz, C<sub>6</sub>D<sub>6</sub>, 60 °C)  $\delta$  8.25 (d,  $J$  = 8.1 Hz, 1H), 7.29 (d,  $J$  = 7.6 Hz, 1H), 7.21–7.09 (m, 6H), 6.89 (t,  $J$  = 7.6 Hz, 1H), 5.97–5.92 (m, 1H), 5.84 (dt,  $J$  = 9.5, 2.4 Hz, 1H), 4.44 (d,  $J$  = 11.7 Hz, 1H), 4.38 (dd,  $J$  = 14.9, 6.6 Hz, 1H), 4.29 (d,  $J$  = 11.7 Hz, 1H), 3.96 (br s, 1H), 3.79 (dd,  $J$  = 11.2, 7.6, 1H), 3.65 (s, 3H), 2.87–2.82 (m, 1H), 2.49 (d,  $J$  = 15.2 Hz, 1H), 2.22–2.15 (m, 1H), 1.82 (dd,  $J$  = 12.5, 5.1 Hz, 1H), 1.43 (s, 9H).

Trifluoroacetic acid (25  $\mu$ L, 20 eq) was added to a stirred solution of benzyl ether **38** (8 mg, 0.017 mmol) in  $\text{CH}_2\text{Cl}_2$  (0.5 mL) at 0 °C. Following stirring for 10 min at 0 °C, saturated aqueous  $\text{NaHCO}_3$  was added. The aqueous phase was then extracted with EtOAc, and the combined organic extract was washed with brine, dried ( $\text{Na}_2\text{SO}_4$ ), filtered and concentrated under reduced pressure. Purification of the crude residue by column chromatography (20% to 35% EtOAc/hexanes) gave **38** (6 mg, 0.016 mmol, 92%) as a clear, colorless oil. <sup>1</sup>H NMR (500 MHz, C<sub>6</sub>D<sub>6</sub>, 60 °C)  $\delta$  9.33 (d,  $J$  = 7.5 Hz, 1H), 8.08 (d,  $J$  = 8.3 Hz, 1H), 7.38 (d,  $J$  = 7.6 Hz, 1H), 7.18 (dt,  $J$  = 1.3, 7.2 Hz, 1H), 7.10–7.14 (m, 1H), 6.42 (dt,  $J$  = 6.0, 15.7 Hz, 1H), 5.96 (ddt,  $J$  = 1.6, 7.5, 15.7 Hz, 1H), 3.97 (br s, 1H), 3.65 (dd,  $J$  = 1.5, 6.0 Hz, 2H), 3.33 (s, 3H), 3.01 (q,  $J$  = 6.7 Hz, 2H), 2.54 (t,  $J$  = 7.0 Hz, 2H), 1.38 (s, 9H); <sup>13</sup>C NMR (125 MHz, C<sub>6</sub>D<sub>6</sub>, 60 °C)  $\delta$  191.8, 153.4, 151.7, 136.0, 133.1, 132.6, 129.8, 128.2, 124.4, 123.0, 118.6, 118.2, 115.9, 78.5, 52.5, 40.5, 29.4, 28.1, 24.6;

IR (neat) 3382, 1735, 1688  $\text{cm}^{-1}$ ; HRMS (ESI) calcd for  $\text{C}_{21}\text{H}_{26}\text{N}_2\text{O}_5\text{Na}$   $[\text{M} + \text{Na}]$ : 409.1740. Found: 409.1743.

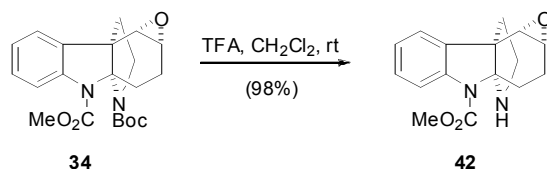

**Epoxide 42.** Trifluoroacetic acid (3.2 mL) was added to a stirring solution of **34** (500 mg, 1.29 mmol) in CH<sub>2</sub>Cl<sub>2</sub> (16 mL) at 0 °C under Ar. The cooling bath was removed, and the reaction mixture was allowed to warm to rt for 2.5 h. The reaction mixture then was cooled to 0 °C and saturated aqueous NaHCO<sub>3</sub> (40 mL) was added dropwise. The mixture was diluted with EtOAc (100 mL), and the separated organic phase was washed with brine (50 mL), dried (Na<sub>2</sub>SO<sub>4</sub>), filtered and concentrated under reduced pressure. Purification of the crude residue by column chromatography (50% EtOAc/hexanes) gave **42** (360 mg, 1.26 mmol, 98%) as a colorless oil: [α]<sub>589</sub> −146, [α]<sub>577</sub> −153, [α]<sub>546</sub> −176, [α]<sub>435</sub> −330, [α]<sub>405</sub> −431 (*c* 1.0, CHCl<sub>3</sub>); <sup>1</sup>H NMR (500 MHz, C<sub>6</sub>D<sub>6</sub>, 60 °C) δ 7.94 (d, *J* = 7.0 Hz, 1H), 7.10 (ddd, *J* = 6.5, 6.5, 2.0 Hz, 1H), 6.88 (m, 2H), 3.48 (s, 3H), 3.08 (d, *J* = 4.0 Hz, 1H), 2.77 (t, *J* = 8.5 Hz, 1H), 2.71 (m, 1H), 2.68 (ddd, *J* = 7.0, 7.0, 2.0 Hz, 1H), 2.61 (br s, 1H), 2.50 (ddd, *J* = 10.0, 9.0, 5.0 Hz, 1H), 2.39 (ddd, *J* = 12.5, 11.5, 7.0 Hz, 1H), 2.02 (ddd, *J* = 13.5, 13.5, 4.0 Hz, 1H), 1.84 (ddd, *J* = 11.5, 5.0, 2.0 Hz, 1H), 1.64 (dddd, *J* = 15.0, 4.0, 4.0, 4.0 Hz, 1H), 1.37 (dddd, *J* = 13.5, 13.5, 3.5, 1.0 Hz, 1H); <sup>13</sup>C NMR (125 MHz, C<sub>6</sub>D<sub>6</sub>, 60 °C) δ 154.2, 144.3, 133.7, 129.2, 124.2, 123.6, 115.8, 88.8, 57.6, 54.4, 53.2, 52.2, 43.3, 38.0, 27.8, 21.4; IR (neat) 3377, 2958, 2850, 1698, 1598, 1484, 1439, 1374 cm<sup>−1</sup>; HRMS (ESI) calcd for C<sub>16</sub>H<sub>19</sub>N<sub>2</sub>O<sub>3</sub> [*M* + *H*]: 287.1396. Found: 287.1396.

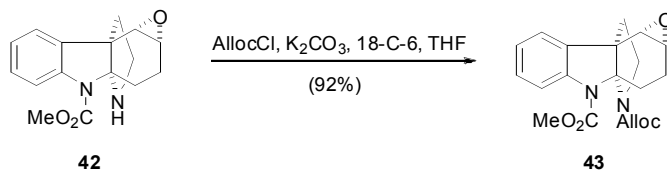

**Epoxide 43.** Allyl chloroformate (3.40 mL, 31.1 mmol) was added to a stirring solution of aminoral **42** (2.96 g, 10.3 mmol) in THF (125 mL) at 0 °C. K<sub>2</sub>CO<sub>3</sub> (4.30 g, 31.1

mmol) was added, followed by 18-crown-6 (300 mg, 1.04 mmol). The reaction was warmed to rt over 2 h, stirred for an additional 18 h, and then quenched with saturated aqueous  $\text{NH}_4\text{Cl}$  (50 mL). The aqueous layer was extracted with  $\text{Et}_2\text{O}$ , and the combined organic fractions were washed with brine, dried ( $\text{Na}_2\text{SO}_4$ ), filtered and concentrated under reduced pressure. Purification of the crude residue by column chromatography (20%  $\text{EtOAc}$ /hexanes) gave epoxide **43** (3.52 g, 9.5 mmol, 92%) as a thick, clear oil:  $[\alpha]_{589} -81.1$ ,  $[\alpha]_{577} -84.4$ ,  $[\alpha]_{546} -96.4$ ,  $[\alpha]_{435} -167$ ,  $[\alpha]_{405} -208$  ( $c$  2.10,  $\text{CHCl}_3$ );  $^1\text{H}$  NMR (500 MHz,  $\text{C}_6\text{D}_6$ , 60 °C)  $\delta$  8.11 (d,  $J = 8.2$  Hz, 1H), 7.07–7.10 (m, 1H), 6.86–6.92 (m, 2H), 5.65–5.71 (m, 1H), 5.00 (dd,  $J = 17.2, 1.6$  Hz, 1H), 4.90 (dd,  $J = 10.5, 1.4$  Hz, 1H), 4.41–4.45 (m, 1H), 4.30 (dd,  $J = 13.4, 5.4$  Hz, 1H), 3.69 (s, 3H), 3.42 (ddd,  $J = 14.1, 3.3, 3.3$  Hz, 1H), 3.37 (d,  $J = 9.3$  Hz, 1H), 2.85 (ddd,  $J = 12.0, 10.5, 6.5$  Hz, 1H), 2.79 (s, 2H), 2.31 (ddd,  $J = 12.6, 12.6, 8.5$  Hz, 1H), 1.93 (dd,  $J = 12.7, 6.4$  Hz, 1H), 1.81–1.83 (m, 2H), 1.63–1.68 (m, 1H);  $^{13}\text{C}$  NMR (125 MHz,  $\text{C}_6\text{D}_6$ , 60 °C)  $\delta$  154.6, 153.4, 144.5, 133.6, 131.6, 129.5, 123.6, 123.0, 117.5, 116.9, 86.6, 65.6, 56.0, 54.8, 53.1, 52.2, 45.1, 29.7, 24.1, 22.1; IR (neat)  $1698\text{ cm}^{-1}$ ; HRMS (ESI) calcd for  $\text{C}_{20}\text{H}_{22}\text{O}_5\text{N}_2\text{Na}$   $[\text{M} + \text{Na}]$ : 393.1426. Found: 393.1415.

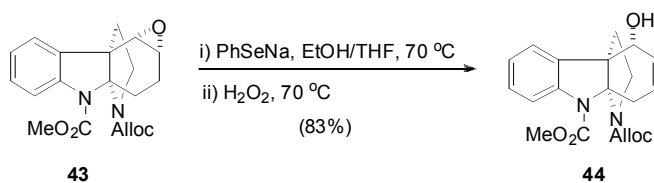

**Allyl alcohol 44.** Following a general procedure,<sup>8</sup> a mixture of  $\text{PhSeSePh}$  (1.71 g, 5.48 mmol) and absolute  $\text{EtOH}$  (20 mL) was stirred at 0 °C. Solid  $\text{NaBH}_4$  (420 mg, 11.0 mmol) was added in portions to this mixture over a period of 3 min (rapid gas evolution resulted). The originally yellow mixture turned to a clear, colorless solution upon complete addition of  $\text{NaBH}_4$ . The resulting sodium phenyl selenide solution was warmed to rt and stirred for 5 min. To this solution was added epoxide **43** (1.84 g, 4.97 mmol) in 1:1  $\text{THF/EtOH}$  (20 mL), and the reaction was heated to 70 °C for 2 h. To reduce any  $\text{PhSeSePh}$  formed during the course of the reaction, which resulted in yellowing of the reaction, ca. 10 mg portions of  $\text{NaBH}_4$  were added twice. The reaction was then cooled to 0 °C, diluted with  $\text{THF}$  (15 mL), and 30%  $\text{H}_2\text{O}_2$  (11 mL) was added slowly. The



reaction was again heated to 70 °C for 20 min during which time rapid gas evolution was noticed. The reaction then was poured into saturated NaHCO<sub>3</sub>, extracted with CH<sub>2</sub>Cl<sub>2</sub>, and the combined organic layers were dried (Na<sub>2</sub>SO<sub>4</sub>), filtered and concentrated under reduced pressure. Purification of the crude residue by column chromatography (20% EtOAc/hexanes) gave allyl alcohol **44** (1.54 g, 4.15 mmol, 83%) as clear, colorless oil:  $[\alpha]_{589} -126$ ,  $[\alpha]_{577} -132$ ,  $[\alpha]_{546} -150$ ,  $[\alpha]_{435} -258$ ,  $[\alpha]_{405} -320$  (*c* 1.30, CHCl<sub>3</sub>); <sup>1</sup>H NMR (500 MHz, C<sub>6</sub>D<sub>6</sub>, 60 °C)  $\delta$  8.15 (d, *J* = 8.2 Hz, 1H), 7.44 (dd, *J* = 1.1, 7.5 Hz, 1H), 7.11–7.15 (m, 1H), 6.91 (ddd, *J* = 7.5, 7.5, 1.0 Hz, 1H), 5.80–5.83 (m, 1H), 5.72–5.80 (m, 2H), 5.09 (ddd, *J* = 17.2, 1.6, 1.6 Hz, 1H), 4.95 (dd, *J* = 10.5, 1.4 Hz, 1H), 4.41–4.51 (m, 2H), 4.23 (dd, *J* = 15.2, 6.5 Hz, 1H), 4.13 (d, *J* = 1.7 Hz, 1H), 3.77 (dd, *J* = 11.1, 7.3 Hz, 1H), 3.61 (s, 3H), 2.85 (ddd, *J* = 11.3, 11.3, 5.5 Hz, 1H), 2.39–2.42 (m, 2H), 2.05 (ddd, *J* = 12.4, 12.4, 7.9 Hz, 1H), 1.79 (dd, *J* = 12.4, 5.3 Hz, 1H); <sup>13</sup>C NMR (125 MHz, C<sub>6</sub>D<sub>6</sub>, 60 °C)  $\delta$  153.8, 153.1, 143.4, 134.6, 134.2, 133.7, 128.8, 126.2, 124.3, 123.6, 117.0, 115.7, 91.3, 73.1, 65.7, 64.4, 52.0, 46.1, 34.4, 31.2; IR (neat) 3462, 1690, 1728 cm<sup>-1</sup>; HRMS (ESI) calcd for C<sub>20</sub>H<sub>22</sub>O<sub>5</sub>N<sub>2</sub>Na [M + Na]: 393.1426. Found: 393.1415.

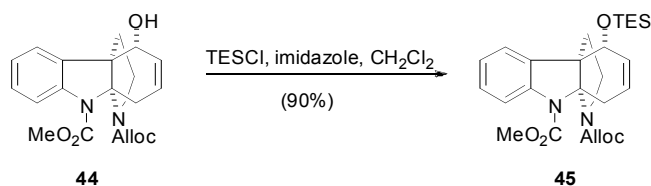

**Silyl Ether 45.** TESCl (1.64 mL, 9.73 mmol) was added to a stirred solution of allyl alcohol **44** (2.40 g, 6.48 mmol) and imidazole (660 mg, 9.73 mmol) in CH<sub>2</sub>Cl<sub>2</sub> (60 mL) at rt. TLC analysis after 20 min indicated complete consumption of the starting alcohol, and the reaction was then quenched with H<sub>2</sub>O (50 mL). The aqueous layer was extracted with CH<sub>2</sub>Cl<sub>2</sub>, and the combined organic layers were washed with saturated aqueous NH<sub>4</sub>Cl, dried (Na<sub>2</sub>SO<sub>4</sub>), filtered and concentrated under reduced pressure. Purification of the crude residue by column chromatography (10% EtOAc/hexanes) gave silylated alcohol **45** (2.82 g, 5.83 mmol, 90%) as a colorless amorphous solid:  $[\alpha]_{589} -132$ ,  $[\alpha]_{577} -138$ ,  $[\alpha]_{546} -157$ ,  $[\alpha]_{435} -272$ ,  $[\alpha]_{405} -339$  (*c* 1.13, CHCl<sub>3</sub>); <sup>1</sup>H NMR (500 MHz, C<sub>6</sub>D<sub>6</sub>, 60 °C)  $\delta$  8.23 (d, *J* = 8.2 Hz, 1H), 7.44 (d, *J* = 7.5 Hz, 1H), 7.13–7.15 (m, 1H), 6.93 (t, *J* = 7.4 Hz, 1H), 5.83–5.86 (m, 1H), 5.74–5.82 (m, 2H), 5.10 (dd, *J* = 17.2,

1.6 Hz, 1H), 4.95 (dd,  $J = 10.5$ , 1.4 Hz, 1H), 4.44–4.53 (m, 2H), 4.38 (s, 1H), 4.25 (dd,  $J = 15.3$ , 6.4 Hz, 1H), 3.80 (dd,  $J = 11.1$ , 7.8 Hz, 1H), 3.63 (s, 3H), 2.87 (ddd,  $J = 12.3$ , 5.4, 4.6 Hz, 1H), 2.55–2.59 (m, 1H), 2.15 (ddd,  $J = 12.4$ , 7.9, 7.9 Hz, 1H), 1.79 (dd,  $J = 12.4$ , 5.3 Hz, 1H), 0.94 (t,  $J = 8.0$  Hz, 9H), 0.57 (q,  $J = 8.0$  Hz, 6H);  $^{13}\text{C}$  NMR (125 MHz,  $\text{C}_6\text{D}_6$ , 60 °C)  $\delta$  153.8, 152.9, 143.9, 134.2, 134.0, 133.9, 129.0, 126.7, 124.4, 123.1, 116.8, 115.7, 91.3, 74.2, 65.5, 65.1, 51.9, 46.1, 34.6, 31.3, 7.0, 5.6; IR (neat) 1692, 1727  $\text{cm}^{-1}$ ; HRMS (ESI) calcd for  $\text{C}_{26}\text{H}_{36}\text{O}_5\text{N}_2\text{SiNa}$  [ $\text{M} + \text{Na}$ ]: 507.2291. Found: 507.2298.

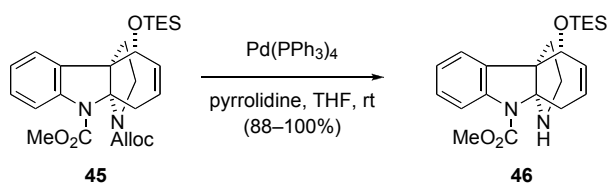

**Tetracyclic Amine 46.** A solution of **45** (2.50 g, 5.16 mmol), pyrrolidine (8.7 mL, 103 mmol) and THF (50 mL) was degassed with Ar for 30 min and stirred at rt. To this mixture was added  $\text{Pd(PPh}_3)_4$  (605 mg, 0.52 mmol) in one portion, and stirring was continued for an additional 30 min. The reaction was then concentrated under reduced pressure. Purification of the crude residue by column chromatography (20% to 50% EtOAc/hexanes) gave aminal **46** (2.07 g, 5.16 mmol, 100%) as a thick, light yellow oil:  $[\alpha]_{589} -78.1$ ,  $[\alpha]_{577} -82.1$ ,  $[\alpha]_{546} -94.2$ ,  $[\alpha]_{435} -171$ ,  $[\alpha]_{405} -216$  ( $c$  1.60,  $\text{CHCl}_3$ );  $^1\text{H}$  NMR (500 MHz,  $\text{C}_6\text{D}_6$ , 60 °C)  $\delta$  7.95 (br s, 1H), 7.57 (d,  $J = 7.4$  Hz, 1H), 7.13–7.15 (m, 1H), 6.96 (t,  $J = 7.5$  Hz, 1H), 5.85 (ddd,  $J = 9.4$ , 9.4, 2.7 Hz, 1H), 5.70–5.73 (m, 1H), 4.41 (d,  $J = 2.1$  Hz, 1H), 3.51 (s, 3H), 3.28 (br s, 1H), 3.05 (br s, 1H), 2.72 (t,  $J = 8.0$  Hz, 1H), 2.53–2.58 (m, 1H), 2.29 (ddd,  $J = 11.8$ , 11.8, 6.9 Hz, 1H), 2.13 (d,  $J = 14.4$  Hz, 1H), 1.93 (dd,  $J = 11.9$ , 4.7 Hz, 1H), 0.98 (t,  $J = 8.0$  Hz, 9H), 0.63 (q,  $J = 8.0$  Hz, 6H);  $^{13}\text{C}$  NMR (125 MHz,  $\text{C}_6\text{D}_6$ , 60 °C)  $\delta$  153.6, 143.7, 136.1, 134.0, 128.4, 126.8, 125.1, 123.0, 114.7, 92.1, 75.1, 63.0, 51.7, 43.6, 37.9, 34.5, 7.0, 5.7; IR (neat) 3378, 3047, 1691  $\text{cm}^{-1}$ ; HRMS (ESI) calcd for  $\text{C}_{22}\text{H}_{32}\text{O}_3\text{N}_2\text{SiH}$  [ $\text{M} + \text{H}$ ]: 401.2260. Found: 401.2253.

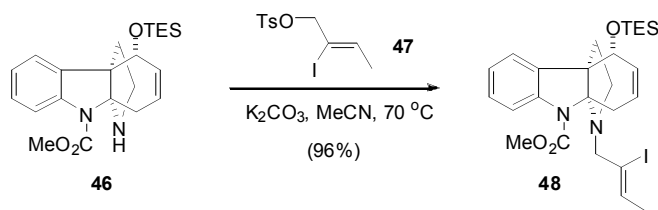

**Vinyl iodide 48.** A mixture of **46** (372 mg, 0.93 mmol), (Z)-2-iodo-2-butenyl tosylate (**47**)<sup>9</sup> (660 mg, 1.87 mmol), K<sub>2</sub>CO<sub>3</sub> (640 mg, 4.65 mmol) and MeCN (10 mL) was stirred at 70 °C for 18 h. After cooling to rt, the reaction was partitioned between Et<sub>2</sub>O and water. The aqueous layer was extracted with additional Et<sub>2</sub>O, and the combined organic layers were washed with brine, dried (Na<sub>2</sub>SO<sub>4</sub>), filtered and concentrated under reduced pressure. Purification of the crude residue by column chromatography (5% EtOAc/hexanes) gave vinyl iodide **48** (520 mg, 0.89 mmol, 96%) as a clear, colorless oil: [ $\alpha$ ]<sub>589</sub> +22.7, [ $\alpha$ ]<sub>577</sub> +23.8, [ $\alpha$ ]<sub>546</sub> +27.4, [ $\alpha$ ]<sub>435</sub> +52.1, [ $\alpha$ ]<sub>405</sub> +67.1 (*c* 1.55, CHCl<sub>3</sub>); <sup>1</sup>H NMR (500 MHz, C<sub>6</sub>D<sub>6</sub>, 60 °C)  $\delta$  7.98 (d, *J* = 8.1 Hz, 1H), 7.57 (dd, *J* = 7.5, 1.0 Hz, 1H), 7.13–7.15 (m, 1H), 6.98 (dt, *J* = 7.5, 1.0 Hz, 1H), 5.84–5.92 (m, 2H), 5.45 (q, *J* = 6.4 Hz, 1H), 4.49 (d, *J* = 14.7 Hz, 1H), 4.41 (d, *J* = 2.1 Hz, 1H), 3.59 (dd, *J* = 15.8, 7.1 Hz, 1H), 3.50 (s, 3H), 3.33 (d, *J* = 14.7 Hz, 1H), 2.69 (t, *J* = 6.9 Hz, 1H), 2.20–2.28 (m, 3H), 1.93–1.96 (m, 1H), 1.59 (dd, *J* = 6.4, 1.8 Hz, 3H), 0.97 (t, *J* = 8.0 Hz, 9H), 0.61 (q, *J* = 8.0 Hz, 6H); <sup>13</sup>C NMR (125 MHz, C<sub>6</sub>D<sub>6</sub>, 60 °C)  $\delta$  154.5, 144.0, 135.3, 134.1, 130.1, 128.5, 126.8, 125.5, 122.9, 115.9, 112.2, 93.5, 74.4, 65.6, 59.9, 51.8, 48.2, 34.5, 33.1, 21.6, 7.0, 5.6; IR (neat) 1704 cm<sup>-1</sup>; HRMS (ESI) calcd for C<sub>26</sub>H<sub>37</sub>O<sub>3</sub>IN<sub>2</sub>SiH [M + H]: 581.1697. Found: 581.1698.

It was observed that extended exposure of **48** to silica gel during chromatography caused partial isomerization to olefin **63** (see below).

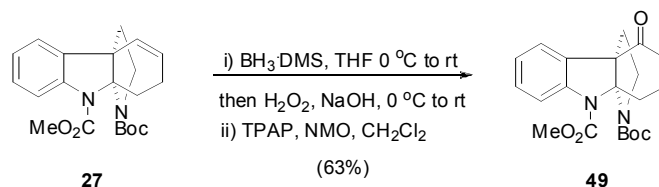

**Ketone 49.** A solution of **27** (575 mg, 1.55 mmol) and THF (25 mL) under Ar was cooled to 0 °C, and BH<sub>3</sub>·DMS (0.51 mL, 5.5 mmol) was added dropwise. The reaction mixture was gradually warmed to rt over 0.5 h and maintained at rt for 1 h. TLC

analysis showed incomplete conversion, so the solution was cooled to 0 °C and additional  $\text{BH}_3\cdot\text{DMS}$  (0.51 mL, 5.5 mmol) was added. The reaction mixture was gradually warmed to rt over 0.5 h and maintained at rt for 2 h. The reaction mixture was cooled to 0 °C, and 3 N NaOH and 30%  $\text{H}_2\text{O}_2$  (1 mL each) were added sequentially, and the mixture was stirred at 0 °C for 30 min and at rt for an additional 30 min. The mixture was diluted with EtOAc (30 mL), and the separated organic phase was washed sequentially with saturated aqueous  $\text{NaHCO}_3$  (15 mL),  $\text{H}_2\text{O}$  (15 mL), and brine (15 mL). The organic phase was dried ( $\text{Na}_2\text{SO}_4$ ), filtered and concentrated under reduced pressure to afford a clear, colorless oil which was used immediately without purification.

A stirring rt solution of this crude residue (1.55 mmol theoretical) in  $\text{CH}_2\text{Cl}_2$  (25 mL) was charged sequentially with crushed 4 Å molecular sieves (~1 g), TPAP (55 mg, 0.16 mmol), and NMO (360 mg, 3.1 mmol). The reaction mixture was maintained at rt for 20 min, then concentrated to ~5 mL under a stream of  $\text{N}_2$ . The mixture was filtered through a small  $\text{SiO}_2$  plug (20% EtOAc/hexanes) and the filtrate was concentrated under reduced pressure. Purification of the crude residue by column chromatography (10% to 20% EtOAc/hexanes) gave **49** (380 mg, 0.98 mmol, 63%) as a colorless foam (**50** was isolated in 21% yield; see below for optimized procedure for **50**): **49**  $^1\text{H}$  NMR (500 MHz,  $\text{C}_6\text{D}_6$ , 60 °C)  $\delta$  7.97 (d,  $J$  = 8.0 Hz, 1H), 6.92 (ddd,  $J$  = 7.5, 7.5, 1.5 Hz, 1H), 6.85 (dd,  $J$  = 7.5, 1.0 Hz, 1H), 6.62 (ddd,  $J$  = 7.5, 7.5, 1.0 Hz, 1H), 3.45 (s, 3H), 3.41 (ddd,  $J$  = 8.5, 8.5, 3.5 Hz, 1H), 2.82 (ddd,  $J$  = 11.0, 9.0, 7.5 Hz, 1H), 2.56 (m, 2H), 2.31 (ddd,  $J$  = 13.0, 9.0, 9.0 Hz, 1H), 1.86 (dddd,  $J$  = 17.0, 17.0, 17.0, 7.0, 7.0 Hz, 2H), 1.50 (ddd,  $J$  = 13.0, 7.5, 3.5 Hz, 1H), 1.30 (m, 2H), 1.26 (s, 9H);  $^{13}\text{C}$  NMR (125 MHz,  $\text{C}_6\text{D}_6$ , 60 °C)  $\delta$  206.7, 153.9, 153.1, 143.7, 130.6, 129.9, 123.9, 123.8, 116.7, 93.3, 80.0, 69.0, 52.4, 46.8, 38.1, 34.1, 32.1, 28.9, 19.4; IR (neat) 2958, 1707, 1483, 1444, 1383  $\text{cm}^{-1}$ ; HRMS (CI) calcd for  $\text{C}_{21}\text{H}_{26}\text{N}_2\text{O}_5$ : 386.1842. Found: 386.1846.

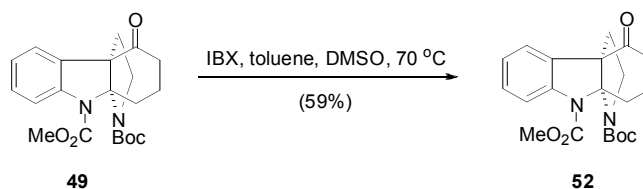

**Enone 52.** A solution of **49** (200 mg, 0.52 mmol) in toluene (3.5 mL) and DMSO (1.7 mL) under Ar was charged with IBX (580 mg, 2.07 mmol), and the reaction mixture was heated to 70 °C.<sup>10</sup> Over the course of a 24 h period, the reaction was charged with two additional portions of IBX (580 mg, 2.07 mmol each). The reaction was cooled to rt and diluted with Et<sub>2</sub>O (20 mL). Saturated aqueous NaHCO<sub>3</sub> (35 mL) and saturated aqueous Na<sub>2</sub>S<sub>2</sub>O<sub>3</sub> (35 mL) were added, and the mixture was stirred vigorously for 1 h. The separated aqueous phase was washed with ether (30 mL), and the combined organic fractions were washed with brine (25 mL), dried (Na<sub>2</sub>SO<sub>4</sub>), filtered and concentrated under reduced pressure. Purification of the crude residue by column chromatography (35% EtOAc/hexanes) gave **52** (119 mg, 0.31 mmol, 59%) as a colorless foam: <sup>1</sup>H NMR (500 MHz, C<sub>6</sub>D<sub>6</sub>, 60 °C) δ 7.93 (d, *J* = 8.0 Hz, 1H), 7.47 (dd, *J* = 7.5, 1.0 Hz, 1H), 7.07 (ddd, *J* = 8.0, 8.0, 1.0 Hz, 1H), 6.85 (t, *J* = 7.5 Hz, 1H), 6.43 (ddd, *J* = 9.5, 4.5, 4.5 Hz, 1H), 5.89 (ddd, *J* = 10.0, 1.5, 1.5 Hz, 1H), 3.55 (s, 3H), 3.37 (m, 3H), 3.05 (ddd, *J* = 11.0, 8.0, 8.0 Hz, 1H), 2.18 (ddd, *J* = 13.0, 8.5, 8.5 Hz, 1H), 1.98 (ddd, *J* = 12.5, 8.0, 4.5 Hz, 1H), 1.40 (s, 9H); <sup>13</sup>C NMR (125 MHz, C<sub>6</sub>D<sub>6</sub>, 60 °C) δ 195.4, 153.9, 153.6, 147.0, 142.9, 130.2, 129.9, 129.7, 124.6, 124.5, 117.4, 90.5, 80.2, 65.9, 52.4, 47.6, 33.2, 30.4, 28.9; IR (neat) 2979, 1694, 1675, 1478, 1387 cm<sup>-1</sup>; HRMS (CI) calcd for C<sub>21</sub>H<sub>24</sub>N<sub>2</sub>O<sub>5</sub>: 384.1685. Found: 384.1685.

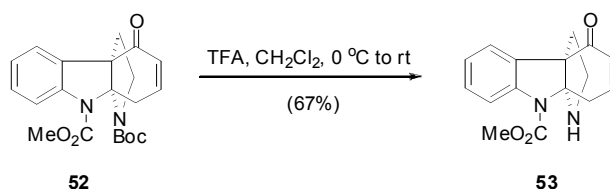

**Enone 53.** Trifluoroacetic acid (0.75 mL) was added to a stirred solution of **52** (115 mg, 0.30 mmol) in CH<sub>2</sub>Cl<sub>2</sub> (4 mL) at 0 °C under Ar. The cooling bath was removed, and the reaction mixture was allowed to warm to rt for 2.5 h. The reaction mixture then was cooled to 0 °C and saturated aqueous NaHCO<sub>3</sub> (10 mL) was added dropwise. The

mixture was diluted with EtOAc (30 mL), and the separated organic phase was washed with brine (15 mL), dried (Na<sub>2</sub>SO<sub>4</sub>), filtered and concentrated under reduced pressure. Purification of the crude residue by column chromatography (35% EtOAc/hexanes) gave **53** (58 mg, 0.20 mmol, 67%) as a pale orange foam: <sup>1</sup>H NMR (500 MHz, C<sub>6</sub>D<sub>6</sub>, 60 °C) δ 7.79 (dd, *J* = 7.5, 1.0 Hz, 1H), 7.77 (br s, 1H), 7.08 (ddd, *J* = 8.5, 8.5, 1.5 Hz, 1H), 6.86 (ddd, *J* = 7.5, 7.5, 1.0 Hz, 1H), 6.06 (ddd, *J* = 10.0, 5.5, 3.0 Hz, 1H), 5.93 (ddd, *J* = 10.0, 3.0, 1.5 Hz, 1H), 3.47 (s, 3H), 3.46 (br s, 1H), 2.98 (m, 1H), 2.61 (ddd, *J* = 8.5, 8.5, 2.0 Hz, 1H), 2.53 (ddd, *J* = 10.0, 10.0, 6.5 Hz, 1H), 2.42 (ddd, *J* = 12.5, 10.0, 8.0 Hz, 1H), 2.34 (m, 1H), 2.00 (ddd, *J* = 12.5, 6.5, 2.0 Hz, 1H); <sup>13</sup>C NMR (125 MHz, C<sub>6</sub>D<sub>6</sub>, 60 °C) δ 196.5, 153.2, 145.4, 131.4, 128.8, 128.3, 127.7, 125.1, 123.8, 114.9, 91.1, 62.0, 51.9, 42.9, 41.8, 35.7; IR (neat) 3365, 2954, 2846, 1692, 1671, 1482 cm<sup>-1</sup>; HRMS (CI) calcd for C<sub>16</sub>H<sub>16</sub>N<sub>2</sub>O<sub>3</sub>: 284.1161. Found: 284.1162.

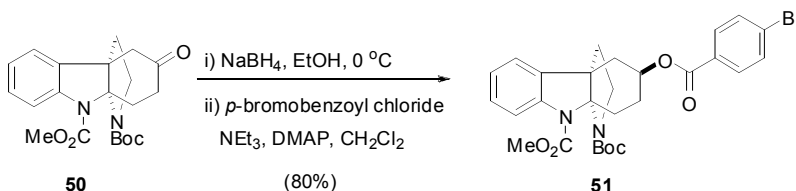

**Proof of Absolute Configuration by Heavy Atom X-Ray Analysis of Benzyl Ester **51**.** Solid NaBH<sub>4</sub> (20 mg, 0.52 mmol) was added in one portion to ketone **50** (100 mg, 0.26 mmol) and EtOH (3 mL) at 0 °C. After 15 min at 0 °C, the reaction was quenched with saturated aqueous NH<sub>4</sub>Cl and warmed to rt. The reaction was extracted with CH<sub>2</sub>Cl<sub>2</sub>, dried (Na<sub>2</sub>SO<sub>4</sub>), filtered and concentrated under reduced pressure. Purification of the crude residue by column chromatography (35% to 50% EtOAc/hexanes) gave a 1:1 ratio of cleanly separated diastereomeric alcohols (91 mg combined, 0.24 mmol, 91%). The stereochemistry of each alcohol was not determined at this stage. The alcohols were distinguished based on their R<sub>f</sub> values (35% EtOAc/hexanes): lower isomer R<sub>f</sub> 0.1; upper isomer R<sub>f</sub> 0.2.

DMAP (~1 mg) was added to a stirring solution of the lower R<sub>f</sub> diastereomeric alcohol (10 mg, 0.026 mmol) and Et<sub>3</sub>N (8 μL, 0.052 mmol) in CH<sub>2</sub>Cl<sub>2</sub> (1 mL) at rt. The mixture was then treated with *p*-bromobenzoyl chloride (8.5 mg, 0.039 mmol) and stirred at rt for 4 h. After this time, 1 N NaOH was added to the reaction and stirred for 20 min.

The reaction was extracted with  $\text{CH}_2\text{Cl}_2$ , dried ( $\text{Na}_2\text{SO}_4$ ), filtered and concentrated under reduced pressure. Purification of the crude residue by preparative TLC (50% EtOAc/hexanes) gave **51** as a clear, colorless oil (13 mg, 0.023 mmol, 88%) that slowly solidified. Re-crystallization from  $\text{CH}_2\text{Cl}_2$ /hexanes gave X-ray quality crystals<sup>7</sup>:  $[\alpha]_{589} -90.2$ ,  $[\alpha]_{577} -93.6$ ,  $[\alpha]_{546} -106$ ,  $[\alpha]_{435} -183$ ,  $[\alpha]_{405} -222$  (*c* 0.84,  $\text{CHCl}_3$ );  $^1\text{H}$  NMR (500 MHz,  $\text{C}_6\text{D}_6$ , 60 °C)  $\delta$  8.07 (d, *J* = 7.8 Hz, 1H), 7.42–7.44 (m, 2H), 7.14–7.16 (m, 2H), 7.00 (dt, *J* = 1.5, 7.7 Hz, 1H), 6.70 (dd, *J* = 1.1, 7.4 Hz, 1H), 6.66 (dt, *J* = 0.9, 7.4 Hz, 1H), 5.02–5.07 (m, 1H), 3.59 (s, 3H), 3.31–3.35 (m, 1H), 3.07 (ddd, *J* = 8.4, 8.4, 9.9 Hz, 1H), 2.80–2.84 (m, 1H), 2.54 (br s, 1H), 1.82 (dd, *J* = 6.8, 14.6 Hz, 1H), 1.65–1.74 (m, 2H), 1.56 (dd, *J* = 3.4, 14.6 Hz, 1H), 1.50 (ddd, *J* = 5.0, 8.4, 13.0 Hz, 1H), 1.42–1.46 (m, 1H), 1.40 (s, 9H);  $^{13}\text{C}$  NMR (125 MHz,  $\text{C}_6\text{D}_6$ , 60 °C)  $\delta$  164.7, 153.9, 153.2, 141.3, 136.1, 131.5, 131.3, 129.8, 128.0, 128.1, 122.9, 121.6, 117.2, 89.3, 79.3, 69.4, 54.3, 51.7, 46.2, 35.1, 34.0, 28.3, 26.9, 26.4; IR (neat) 1708  $\text{cm}^{-1}$ ; HRMS (ESI) calcd for  $\text{C}_{28}\text{H}_{31}\text{BrN}_2\text{O}_6\text{Na}$   $[\text{M} + \text{Na}]$ : 593.1263. Found: 593.1262.

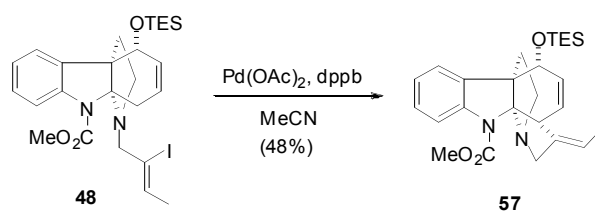

**Pentacycle 57.** A solution of **48** (40 mg, 0.069 mmol) and MeCN (1.2 mL) was degassed with argon for 15 min. To this solution was added  $\text{Pd}(\text{OAc})_2$  (8.0 mg, 0.034 mmol) and bis(diphenylphosphoryl)butane (22 mg, 0.053 mmol), and degassing was continued for an additional 10 min. The sealed reaction vial was then heated to 80 °C for 3 h. Following cooling, the mixture was concentrated under pressure. Purification of the crude residue by column chromatography (10% EtOAc/hexanes) gave **57** (15 mg, 0.033 mmol, 48%) as a clear, colorless oil:  $[\alpha]_{589} +21.6$ ,  $[\alpha]_{577} +22.6$ ,  $[\alpha]_{546} +26.4$ ,  $[\alpha]_{435} +53.8$ ,  $[\alpha]_{405} +71.6$  (*c* 1.80,  $\text{CHCl}_3$ );  $^1\text{H}$  NMR (500 MHz,  $\text{C}_6\text{D}_6$ , 60 °C)  $\delta$  8.30 (d, *J* = 8.1 Hz, 1H), 7.45 (dd, *J* = 7.4, 1.0 Hz, 1H), 7.17–7.20 (m, 1H), 6.96 (ddd, *J* = 7.4, 7.4, 1.0 Hz, 1H), 5.78 (ddd, *J* = 10.0, 3.4, 1.8 Hz, 1H), 5.39 (ddd, *J* = 10.0, 10.0, 2.4 Hz, 1H), 5.10–5.13 (m, 1H), 4.37 (q, *J* = 1.8 Hz, 1H), 3.73 (d, *J* = 12.5 Hz, 1H), 3.46 (br.s, 4H), 3.15–3.19 (m, 1H), 2.72 (ddd, *J* = 11.9, 11.9, 5.1 Hz, 1H), 2.39 (dd, *J* = 11.7, 6.9 Hz,

1H), 2.17 (ddd,  $J = 12.2, 12.2, 7.2$  Hz, 1H), 2.02 (dd,  $J = 12.4, 5.0$  Hz, 1H), 1.54–1.56 (m, 3H), 0.94 (t,  $J = 8.0$  Hz, 9H), 0.59 (q,  $J = 8.0$  Hz, 6H);  $^{13}\text{C}$  NMR (125 MHz,  $\text{C}_6\text{D}_6$ , 60 °C)  $\delta$  154.4, 145.8, 143.6, 134.0, 132.2, 128.8, 128.7, 124.7, 122.3, 115.6, 111.0, 102.1, 73.8, 63.2, 60.8, 53.1, 51.1, 46.4, 33.0, 13.8, 7.0, 5.6; IR (neat)  $1694\text{ cm}^{-1}$ ; HRMS (ESI) calcd for  $\text{C}_{26}\text{H}_{37}\text{O}_3\text{N}_2\text{Si}$  [ $\text{M} + \text{H}$ ]: 453.2574. Found: 453.2567.

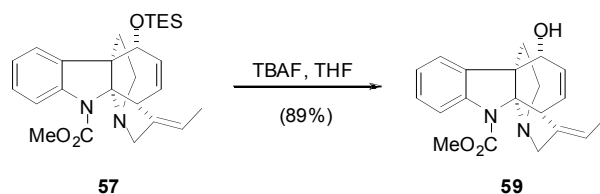

**Alcohol 59.** Tetrabutylammonium fluoride (1.0 M in THF, 60  $\mu\text{l}$ , 0.060 mmol) was added to a stirring solution of aminor **57** (13 mg, 0.029 mmol) in THF (1 ml) at rt. Following stirring for 30 min, the reaction was partitioned between water and  $\text{CH}_2\text{Cl}_2$ . The organic layer was washed with brine, dried ( $\text{Na}_2\text{SO}_4$ ), filtered and concentrated under reduced pressure. Purification of the crude residue by column chromatography (50% EtOAc/hexanes) gave **59** (8.6 mg, 0.026 mmol, 89%) as a colorless, amorphous solid. Crystallization from  $\text{CH}_2\text{Cl}_2$ /hexanes afforded X-ray quality crystals<sup>7</sup>:  $[\alpha]_{589} +56.1$ ,  $[\alpha]_{577} +55.5$ ,  $[\alpha]_{546} +65.7$ ,  $[\alpha]_{435} +132$ ,  $[\alpha]_{405} +171$  ( $c$  0.47,  $\text{CHCl}_3$ );  $^1\text{H}$  NMR (500 MHz,  $\text{C}_6\text{D}_6$ , 60 °C)  $\delta$  8.26 (d,  $J = 8.2$  Hz, 1H), 7.24 (dd,  $J = 1.0, 7.4$  Hz, 1H), 7.14 (dt,  $J = 1.4, 7.5$  Hz, 1H), 6.87 (dt,  $J = 1.0, 7.4$  Hz, 1H), 5.57 (ddd,  $J = 1.9, 3.3, 10.0$  Hz, 1H), 5.29 (ddd,  $J = 2.6, 2.6, 10.0$  Hz, 1H), 5.04–5.06 (m, 1H), 3.94 (br s, 1H), 3.64 (d,  $J = 12.4$  Hz, 1H), 3.51 (br s, 1H), 3.40 (s, 3H), 3.05–3.09 (m, 1H), 2.62 (ddd,  $J = 5.0, 11.9, 11.9$  Hz, 1H), 2.31 (dd,  $J = 6.9, 11.8$  Hz, 1H), 1.98 (ddd,  $J = 7.1, 12.1, 12.1$  Hz, 1H), 1.85 (dd,  $J = 4.0, 12.3$  Hz, 1H), 1.45–1.47 (m, 3H), 1.31 (br s, 1H);  $^{13}\text{C}$  NMR (125 MHz,  $\text{C}_6\text{D}_6$ , 60 °C)  $\delta$  154.0, 145.0, 143.2, 133.9, 131.0, 128.4, 128.2, 123.3, 122.5, 115.3, 110.8, 101.3, 72.2, 62.3, 60.2, 52.4, 50.8, 46.0, 32.2, 13.4; IR (neat)  $3473, 1692\text{ cm}^{-1}$ ; HRMS (ESI) calcd for  $\text{C}_{20}\text{H}_{23}\text{N}_2\text{O}_3$  [ $\text{M} + \text{H}$ ]: 339.1709. Found: 339.1700.



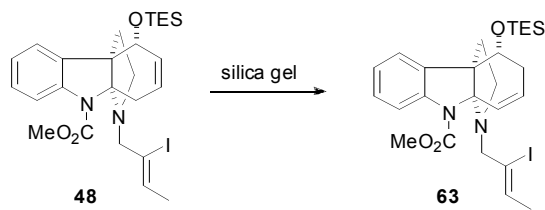

**Alkene 63.** Exposure of **48** to silica gel during chromatography for extended periods of time (>10 min) resulted in the formation of the chromatographically inseparable olefin **63**.<sup>11</sup> <sup>1</sup>H NMR (500 MHz, C<sub>6</sub>D<sub>6</sub>, 60 °C) δ 7.91 (d, *J* = 8.1 Hz, 1H), 7.37 (dd, *J* = 7.5, 1.0 Hz, 1H), 7.13–7.15 (m, 1H), 6.94–6.98 (m, 1H), 6.85 (br d, *J* = 10.5 Hz, 1H), 5.51 (ddd, *J* = 4.1, 4.1, 10.5 Hz, 1H), 5.46 (q, *J* = 6.4 Hz, 1H), 4.15 (br d, *J* = 15.0 Hz, 1H), 3.82 (t, *J* = 8.1 Hz, 1H), 3.63 (d, *J* = 15.0 Hz, 1H), 3.52 (s, 3H), 2.69–2.72 (m, 1H), 2.55 (ddd, *J* = 3.4, 3.4, 7.0 Hz, 1H), 2.15–2.19 (m, 1H), 2.07–2.10 (m, 2H), 2.00–2.05 (m, 1H), 1.55 (d, *J* = 6.4 Hz, 1H), 0.84 (t, *J* = 8.0 Hz, 9H), 0.43 (q, *J* = 8.0 Hz, 6H); <sup>13</sup>C NMR (125 MHz, C<sub>6</sub>D<sub>6</sub>, 60 °C) δ 154.4, 142.0, 136.6, 129.4, 128.3, 125.5, 125.4, 124.0, 122.8, 116.8, 111.7, 90.5, 72.4, 61.3, 60.2, 52.0, 49.7, 31.5, 27.7, 21.5, 6.94, 5.56.

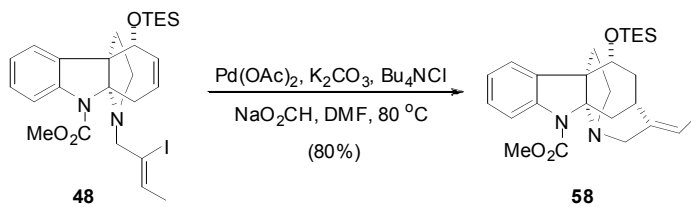

**Pentacycle 58.** A suspension of vinyl iodide **48** (1.20 g, 2.07 mmol), K<sub>2</sub>CO<sub>3</sub> (1.43 g, 10.4 mmol), Bu<sub>4</sub>NCl•H<sub>2</sub>O (1.43 g, 5.18 mmol), NaO<sub>2</sub>CH (170 mg, 2.48 mmol) and DMF (30 mL) was degassed with Ar for 15 min. To this suspension was added Pd(OAc)<sub>2</sub> (5 mg, 0.02 mmol), and degassing was continued for an additional 10 min. The sealed reaction vial was then heated at 80 °C for 90 min by which time TLC analysis indicated complete consumption of starting material. After cooling to rt, the reaction was diluted with Et<sub>2</sub>O and washed with brine. The organic layer was then dried (Na<sub>2</sub>SO<sub>4</sub>) and concentrated under reduced pressure. Purification of the crude residue by column chromatography (5% to 10% EtOAc/hexanes) gave **58** (750 mg, 1.65 mmol, 80%) as a clear, colorless oil: [α]<sub>589</sub> −55.2, [α]<sub>577</sub> −57.9, [α]<sub>546</sub> −64.9, [α]<sub>435</sub> −106, [α]<sub>405</sub> −127 (*c* 1.25, CHCl<sub>3</sub>); <sup>1</sup>H NMR (500 MHz, C<sub>6</sub>D<sub>6</sub>, 60 °C) δ 8.15 (br s, 1H), 7.60 (dd, *J* = 7.5, 1.1 Hz, 1H), 7.17–7.20 (m, 1H), 6.96 (ddd, *J* = 7.5, 7.5, 1.1 Hz, 1H), 5.03 (q, *J* = 6.8 Hz,

1H), 4.29 (br s, 1H), 4.15 (dd,  $J = 11.4, 7.0$  Hz, 1H), 3.57 (s, 3H), 3.04 (ddd,  $J = 14.6, 7.3, 3.5$  Hz, 1H), 2.93 (d,  $J = 16.0$  Hz, 1H), 2.79–2.74 (m, 1H), 2.66 (d,  $J = 11.1$  Hz, 2H), 2.63–2.57 (m, 1H), 2.23 (ddd,  $J = 13.4, 11.5, 7.0$  Hz, 1H), 1.72 (ddd,  $J = 13.4, 7.3, 6.1$  Hz, 1H), 1.59 (dd,  $J = 13.9, 3.2$  Hz, 1H), 1.44 (dd,  $J = 6.8, 2.0$  Hz, 3H), 1.35–1.40 (m, 1H), 0.99 (t,  $J = 8.0$  Hz, 9H), 0.63 (q,  $J = 8.0$  Hz, 6H);  $^{13}\text{C}$  NMR (125 MHz,  $\text{C}_6\text{D}_6$ , 60 °C)  $\delta$  154.1, 144.5, 141.9, 136.8, 128.4, 124.9, 122.5, 117.1, 115.3, 93.0, 73.4, 60.9, 55.7, 54.4, 51.6, 36.6, 34.0, 27.3, 25.8, 13.0, 7.1, 6.1; IR (neat)  $1698\text{ cm}^{-1}$ ; HRMS (ESI) calcd for  $\text{C}_{26}\text{H}_{38}\text{O}_3\text{N}_2\text{SiH}$  [ $\text{M} + \text{H}$ ]: 455.2730. Found: 455.2739.

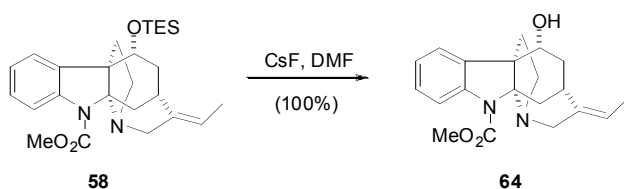

**Alcohol 64.** CsF (1.5 g, 9.90 mmol) was added to a stirred solution of aminor **58** (750 mg, 1.65 mmol) in DMF (25 mL) at rt. TLC analysis after 4 h indicated complete consumption of the starting material, and the reaction was subsequently partitioned between EtOAc and water. The aqueous layer was extracted with EtOAc, and the combined organic layers were washed with brine, dried ( $\text{Na}_2\text{SO}_4$ ), filtered and concentrated under reduced pressure. Purification of the crude residue by column chromatography (50% EtOAc/hexanes) gave alcohol **64** (562 mg, 1.65 mmol, 100%) as a colorless, amorphous solid. Crystallization from benzene/chloroform afforded X-ray quality crystals<sup>7</sup>:  $[\alpha]_{589} -66.8$ ,  $[\alpha]_{577} -69.5$ ,  $[\alpha]_{546} -78.1$ ,  $[\alpha]_{435} -127$ ,  $[\alpha]_{405} -150$  ( $c$  1.00,  $\text{CHCl}_3$ );  $^1\text{H}$  NMR (500 MHz,  $\text{CDCl}_3$ )  $\delta$  7.77 (br s, 1H), 7.51 (dd,  $J = 7.5, 1.0$  Hz, 1H), 7.23 (ddd,  $J = 7.5, 7.5, 1.0$  Hz, 1H), 7.00 (ddd,  $J = 7.5, 7.5, 1.0$  Hz, 1H), 5.32 (q,  $J = 6.7$  Hz, 1H), 4.26 (br d,  $J = 14.6$  Hz, 1H), 4.13–4.20 (m, 1H), 3.92 (s, 3H), 3.18 (ddd,  $J = 14.7, 7.3, 3.8$  Hz, 1H), 3.12 (d,  $J = 15.9$  Hz, 1H), 2.99–3.06 (m, 2H), 2.79 (br d,  $J = 10.9$  Hz, 1H), 2.55 (ddd,  $J = 14.7, 7.5, 5.5$  Hz, 1H), 2.50 (ddd,  $J = 13.8, 7.2, 2.2$  Hz, 1H), 1.78–1.87 (m, 3H), 1.64 (dd,  $J = 6.7, 1.2$  Hz, 3H), 1.41–1.47 (m, 1H);  $^{13}\text{C}$  NMR (125 MHz,  $\text{CDCl}_3$ )  $\delta$  154.4, 143.7, 141.2, 136.5, 128.5, 124.6, 123.2, 118.3, 115.1, 93.3, 72.3, 60.5, 55.8, 54.6, 52.6, 36.4, 33.4, 27.2, 26.3, 13.6; IR (neat)  $3449, 1686\text{ cm}^{-1}$ ; HRMS (ESI) calcd for  $\text{C}_{20}\text{H}_{24}\text{O}_3\text{N}_2\text{H}$  [ $\text{M} + \text{H}$ ]: 341.1865. Found: 341.1854.

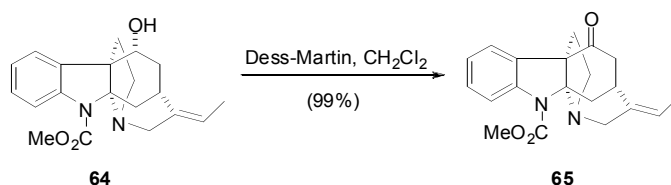

**Ketone 46.** Dess-Martin periodinane (2.1 g, 4.96 mmol) was added in one portion to a stirred solution of alcohol **64** (560 mg, 1.65 mmol) in  $\text{CH}_2\text{Cl}_2$  (100 mL) at rt. The reaction was stirred for 16 h, and subsequently poured into saturated aqueous  $\text{NaHCO}_3$ . The aqueous layer was extracted with  $\text{CH}_2\text{Cl}_2$ , and the organic layer was washed with brine, dried ( $\text{Na}_2\text{SO}_4$ ), filtered and concentrated under reduced pressure. Purification of the crude residue by column chromatography (35% to 50% EtOAc/hexanes) gave ketone **65** (553 mg, 1.63 mmol, 99%) as a colorless foam:  $[\alpha]_{589} -165$ ,  $[\alpha]_{577} -175$ ,  $[\alpha]_{546} -200$ ,  $[\alpha]_{435} -404$ ,  $[\alpha]_{405} -545$  (*c* 1.36,  $\text{CHCl}_3$ );  $^1\text{H}$  NMR (500 MHz,  $\text{C}_6\text{D}_6$ , 60 °C)  $\delta$  8.06 (br s, 1H), 7.91 (d,  $J = 7.5$  Hz, 1H), 7.14 (m, 1H), 6.87 (t,  $J = 7.5$ , 1H), 5.08 (q,  $J = 6.8$  Hz, 1H), 4.06 (br d,  $J = 15.0$  Hz, 1H), 3.56 (s, 3H), 2.85–2.89 (m, 1H), 2.76 (d,  $J = 15.6$  Hz, 1H), 2.68 (br d,  $J = 12.6$  Hz, 1H), 2.50–2.58 (m, 2H), 2.42 (ddd,  $J = 12.4$ , 6.3, 1.9 Hz, 1H), 2.38 (d,  $J = 18.7$  Hz, 1H), 2.20 (dd,  $J = 18.7$ , 7.7 Hz, 1H), 1.84 (ddd,  $J = 12.0$ , 7.4, 7.4 Hz, 1H), 1.41 (dd,  $J = 13.8$ , 2.1 Hz, 1H), 1.27 (d,  $J = 6.9$  Hz, 3H);  $^{13}\text{C}$  NMR (125 MHz,  $\text{C}_6\text{D}_6$ , 60 °C)  $\delta$  207.9, 153.8, 140.9, 137.8, 129.8, 129.1, 124.4, 122.8, 122.1, 115.6, 93.1, 67.7, 54.2, 53.2, 51.8, 45.1, 39.2, 28.4, 28.2, 13.0; IR (neat)  $1701\text{ cm}^{-1}$ ; HRMS (ESI) calcd for  $\text{C}_{20}\text{H}_{22}\text{O}_3\text{N}_2\text{Na}$  [ $\text{M} + \text{Na}$ ]: 361.1528. Found: 361.1528.

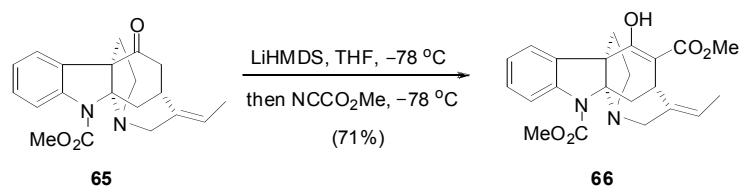

**$\beta$ -Ketoester 66.** LiHMDS (1.0 M in THF, 3.1 ml, 3.10 mmol) was added dropwise to a stirred solution of ketone **65** (530 mg, 1.57 mmol) in THF (40 mL) at  $-78\text{ }^\circ\text{C}$ . The reaction was then warmed to  $0\text{ }^\circ\text{C}$  for 30 min and subsequently re-cooled to  $-78\text{ }^\circ\text{C}$ .  $\text{NCCO}_2\text{Me}$  (0.5 ml, 6.28 mmol) was added and following stirring for 30 min at  $-78\text{ }^\circ\text{C}$ , saturated aqueous  $\text{NH}_4\text{Cl}$  was added and the mixture was allowed to warm to rt.

The reaction was extracted with EtOAc, and the organic layer was washed with brine, dried ( $\text{Na}_2\text{SO}_4$ ), filtered, and concentrated under reduced pressure. Purification of the crude residue by column chromatography (20% to 35% EtOAc/hexanes) gave  $\beta$ -ketoester **66** (443 mg, 1.12 mmol, 71%) as a clear, colorless oil:  $[\alpha]_{589} -196$ ,  $[\alpha]_{577} -207$ ,  $[\alpha]_{546} -237$ ,  $[\alpha]_{435} -438$ ,  $[\alpha]_{405} -566$  ( $c$  1.40,  $\text{CHCl}_3$ );  $^1\text{H}$  NMR (500 MHz,  $\text{C}_6\text{D}_6$ , 60  $^\circ\text{C}$ )  $\delta$  13.1 (s, 1H), 8.06 (br d,  $J = 8.1$  Hz, 1H), 7.90 (dd,  $J = 7.6, 1.1$  Hz, 1H), 7.15 (m, 1H), 6.89 (dt,  $J = 7.5, 1.0$  Hz, 1H), 5.20 (q,  $J = 6.5$  Hz, 1H), 4.11 (br d,  $J = 15.9$  Hz, 1H), 3.64 (br s, 1H), 3.54 (s, 3H), 3.34 (s, 3H), 2.89–2.96 (m, 2H), 2.58–2.62 (m, 1H), 2.54–2.57 (m, 1H), 2.44 (dd,  $J = 12.6, 6.1$  Hz, 1H), 1.96 (ddd,  $J = 11.8, 7.4, 7.4$  Hz, 1H), 1.52–1.56 (m, 4H);  $^{13}\text{C}$  NMR (125 MHz,  $\text{C}_6\text{D}_6$ , 60  $^\circ\text{C}$ )  $\delta$  172.4, 171.4, 153.7, 140.7, 137.1, 130.9, 129.0, 125.1, 122.8, 120.7, 115.7, 103.7, 92.0, 59.8, 53.06, 53.05, 51.8, 50.9, 37.7, 28.70, 28.67, 13.5; IR (neat) 1702, 1645  $\text{cm}^{-1}$ ; HRMS (ESI) calcd for  $\text{C}_{22}\text{H}_{24}\text{O}_5\text{N}_2\text{Na}$   $[\text{M} + \text{Na}]$ : 419.1583. Found: 419.1584.

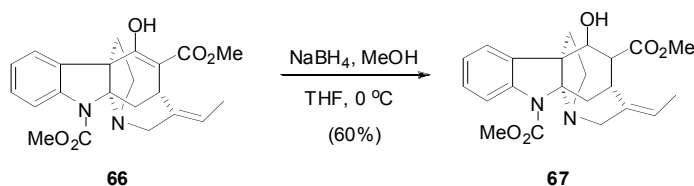

**$\beta$ -Hydroxyester 66.**  $\text{NaBH}_4$  (243 mg, 6.36 mmol) was added in three portions over a 2 h to a stirring solution of  $\beta$ -ketoester **66** (420 mg, 1.06 mmol) in 10:1 THF/MeOH (10 mL) at  $-20^\circ\text{C}$ . After the final  $\text{NaBH}_4$  addition, the reaction was warmed to  $0^\circ\text{C}$  and stirred at this temperature for 2 h. The mixture was quenched with saturated aqueous  $\text{NH}_4\text{Cl}$  and allowed to warm to rt. The reaction was extracted with  $\text{CH}_2\text{Cl}_2$ , and the organic layer was washed with brine, dried ( $\text{Na}_2\text{SO}_4$ ), filtered and concentrated under reduced pressure. Purification of the crude residue by column chromatography (35% to 50% EtOAc/hexanes) gave  $\beta$ -hydroxyester **67** (254 mg, 0.64 mmol, 60%) as a clear, colorless oil and  $\sim 10$ –15% recovered starting material. **66**:  $[\alpha]_{589} -89.7$ ,  $[\alpha]_{577} -93.0$ ,  $[\alpha]_{546} -106$ ,  $[\alpha]_{435} -176$ ,  $[\alpha]_{405} -215$  ( $c$  0.90,  $\text{CHCl}_3$ );  $^1\text{H}$  NMR (500 MHz,  $\text{C}_6\text{D}_6$ , 60  $^\circ\text{C}$ )  $\delta$  8.14 (br s, 1H), 7.10 (t,  $J = 7.4$  Hz, 1H), 6.79 (t,  $J = 7.4$  Hz, 1H), 6.68 (d,  $J = 7.3$  Hz, 1H), 5.05 (q,  $J = 6.8$  Hz, 1H), 4.56 (d,  $J = 4.1$  Hz, 1H), 4.25 (br s, 1H), 3.81 (br s, 1H), 3.52 (s, 3H), 3.51 (s, 3H), 2.85–2.93 (m, 3H), 2.72–2.76 (m, 2H),

2.51–2.56 (m, 1H), 1.75 (ddd,  $J = 12.7, 8.2, 8.2$  Hz, 1H), 1.53–1.57 (m, 2H), 1.51 (d,  $J = 6.7$  Hz, 3H);  $^{13}\text{C}$  NMR (125 MHz,  $\text{C}_6\text{D}_6$ , 60 °C)  $\delta$  173.2, 154.1, 143.6, 131.9, 129.1, 128.5, 128.3, 122.8, 118.1, 116.0, 91.4, 72.8, 61.9, 56.9, 54.0, 51.7, 51.6, 49.8, 38.8, 28.7, 26.0, 13.2; IR (neat) 3461, 1741, 1702  $\text{cm}^{-1}$ ; HRMS (ESI) calcd for  $\text{C}_{22}\text{H}_{26}\text{O}_5\text{N}_2\text{H}$  [ $\text{M} + \text{H}$ ]: 399.1920. Found: 399.1914.

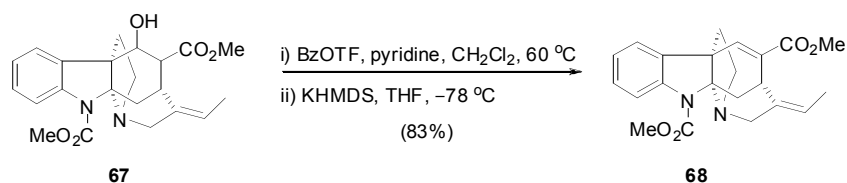

**Enoate 68.** Benzoyl triflate<sup>12</sup> (1.65 ml, 9.8 mmol) was added to a stirring solution of  $\beta$ -hydroxyester **67** (195 mg, 0.49 mmol) and pyridine (1.6 ml, 19.6 mmol) in  $\text{CH}_2\text{Cl}_2$  (6 mL) at 0 °C. The reaction vial was sealed and heated to 60 °C for 24 h. The bright red solution was then cooled to rt and quenched with saturated aqueous  $\text{NaHCO}_3$ . The reaction was extracted with  $\text{CH}_2\text{Cl}_2$ , and the organic layer was washed with brine, dried ( $\text{Na}_2\text{SO}_4$ ), filtered, and concentrated under reduced pressure. Purification of the crude residue by column chromatography (35% to 50% EtOAc/hexanes) gave the benzoate (246 mg, 0.49 mmol, 100%) as a clear, colorless oil which was used in the subsequent elimination step:  $^1\text{H}$  NMR (500 MHz,  $\text{C}_6\text{D}_6$ , 60 °C)  $\delta$  8.00 (d,  $J = 8.6$  Hz, 1H), 7.41–7.29 (m, 4H), 7.17–7.14 (m, 2H), 6.99 (d,  $J = 7.3$  Hz, 1H), 6.92 (t,  $J = 7.6$  Hz, 1H), 6.69 (t,  $J = 7.3$  Hz, 1H), 6.22 (d,  $J = 4.9$  Hz, 1H), 5.29–5.25 (m, 1H), 4.20 (br s, 1H), 3.81 (s, 3H), 3.59 (s, 1H), 3.46 (s, 3H), 3.07–2.85 (m, 4H), 2.46 (d,  $J = 13.0$  Hz, 1H), 2.23–2.17 (m, 1H), 1.96–1.91 (m, 1H), 1.43 (d,  $J = 6.8$  Hz, 3H).

KHMDS (0.5 M in toluene, 1.7 ml, 0.85 mmol) was added dropwise to a stirring solution of this benzoate intermediate (215 mg, 0.43 mmol) in THF (8 mL) at  $-78$  °C. After 10 min the reaction was quenched with saturated aqueous  $\text{NaHCO}_3$  and warmed to rt. The reaction was extracted with  $\text{Et}_2\text{O}$ , and the organic layer was washed with brine, dried ( $\text{Na}_2\text{SO}_4$ ), filtered and concentrated under reduced pressure. Purification of the crude residue by column chromatography (50% EtOAc/hexanes) gave enoate **68** (135 mg, 0.36 mmol, 83%) as a clear, colorless oil:  $[\alpha]_{589} -124$ ,  $[\alpha]_{577} -131$ ,  $[\alpha]_{546} -149$ ,  $[\alpha]_{435} -268$ ,  $[\alpha]_{405} -340$  ( $c$  1.05,  $\text{CHCl}_3$ );  $^1\text{H}$  NMR (500 MHz,  $\text{C}_6\text{D}_6$ , 60 °C)  $\delta$  8.04 (br s, 1H),

7.12 (dt,  $J = 7.5, 1.4$  Hz, 1H), 6.94 (s, 1H), 6.90 (dd,  $J = 7.3, 1.0$  Hz, 1H), 6.82 (dt,  $J = 7.4, 1.0$  Hz, 1H), 5.23 (q,  $J = 7.0$  Hz, 1H), 4.17 (br d,  $J = 15.5$  Hz, 1H), 3.92 (br s, 1H), 3.54 (s, 3H), 3.47 (s, 3H), 2.88–2.90 (m, 2H), 2.54–2.59 (m, 2H), 1.85 (ddd,  $J = 12.5, 7.3, 7.3$  Hz, 1H), 1.70 (dd,  $J = 7.0, 2.3$  Hz, 3H), 1.63 (dd,  $J = 12.4, 5.9$  Hz, 1H), 1.45 (dd,  $J = 12.8, 2.7$  Hz, 1H);  $^{13}\text{C}$  NMR (125 MHz,  $\text{C}_6\text{D}_6$ , 60 °C)  $\delta$  167.2, 153.9, 140.6, 136.5, 136.3, 136.0, 132.3, 128.7, 122.50, 122.48, 121.9, 116.0, 91.7, 56.7, 53.3, 52.6, 51.8, 51.5, 37.9, 30.7, 28.5, 13.7; IR (neat) 1705  $\text{cm}^{-1}$ ; HRMS (ESI) calcd for  $\text{C}_{22}\text{H}_{24}\text{O}_4\text{N}_2\text{H}$  [ $\text{M} + \text{H}$ ]: 381.1814. Found: 381.1820.

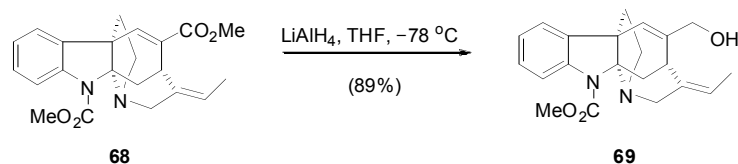

**Alcohol 69.** A solution of enoate **68** (100 mg, 0.26 mmol) in THF (2 mL) was added dropwise to a stirring suspension of  $\text{LiAlH}_4$  (100 mg, 2.60 mmol) in THF (10 mL) at  $-20$  °C. After 10 min the reaction was quenched with water (0.1 ml), followed by 1 N  $\text{NaOH}$  (0.1 ml), and finally  $\text{H}_2\text{O}$  (0.3 ml). The resulting mixture was stirred for 10 min and then  $\text{MgSO}_4$  was added. The solid materials were removed by filtration and the filtrate was concentrated under reduced pressure. Purification of the crude residue by column chromatography (50% to 75%  $\text{EtOAc}$ /hexanes) gave alcohol **69** (82 mg, 0.23 mmol, 89%) as a clear, colorless oil:  $[\alpha]_{589} +15.9$ ,  $[\alpha]_{577} +16.5$ ,  $[\alpha]_{546} +19.8$ ,  $[\alpha]_{435} +46.1$ ,  $[\alpha]_{405} +63.6$  ( $c$  0.90,  $\text{CHCl}_3$ );  $^1\text{H}$  NMR (500 MHz,  $\text{C}_6\text{D}_6$ , 60 °C)  $\delta$  8.08 (br s, 1H), 7.14 (m, 1H), 6.94 (s, 1H), 7.06 (d,  $J = 7.4$  Hz, 1H), 6.89 (m, 1H), 5.67 (s, 1H), 5.16 (q,  $J = 6.8$  Hz, 1H), 4.22 (br s, 1H), 3.92 (q,  $J = 13.5$  Hz, 2 H), 3.57 (s, 3H), 3.23 (br s, 1H), 2.94–2.99 (m, 2H), 2.51–2.56 (m, 2H), 1.87 (ddd,  $J = 12.4, 7.1, 7.1$  Hz, 1H), 1.59–1.61 (m, 4H), 1.52 (dd,  $J = 12.1, 5.6$  Hz, 1H);  $^{13}\text{C}$  NMR (125 MHz,  $\text{C}_6\text{D}_6$ , 60 °C)  $\delta$  154.2, 144.6, 140.7, 137.7, 134.0, 128.4, 122.6, 122.4, 121.2, 119.5, 116.0, 92.1, 65.5, 56.2, 53.0, 52.9, 51.8, 38.5, 31.1, 28.1, 14.3; IR (neat) 3394, 1697  $\text{cm}^{-1}$ ; HRMS (ESI) calcd for  $\text{C}_{21}\text{H}_{24}\text{O}_3\text{N}_2\text{H}$  [ $\text{M} + \text{H}$ ]: 353.1865. Found: 353.1854.

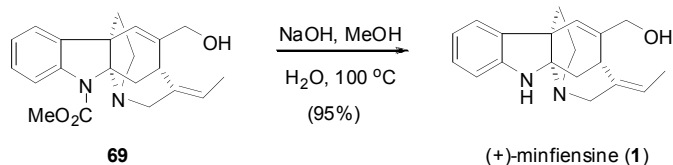

**Minfiensine (1).** 3 N NaOH (3.2 ml, 9.7 mmol) was added to a stirring solution of carbamate **69** (68 mg, 0.19 mmol) in 1:1 MeOH/H<sub>2</sub>O (12 ml). The resultant solution was heated to 100 °C for 2.5 h and subsequently cooled to rt. The reaction was diluted with saturated aqueous NaHCO<sub>3</sub>, extracted with EtOAc, dried (Na<sub>2</sub>SO<sub>4</sub>), filtered, and concentrated under reduced pressure. Purification of the crude residue by column chromatography (100% EtOAc then 99% MeCN/1% NH<sub>4</sub>OH) gave (+)-minfiensine (**1**) (54 mg, 0.18 mmol, 95%) as a colorless foam. The <sup>1</sup>H and <sup>13</sup>C NMR spectra of the synthetic material were identical to reported literature values.<sup>13</sup> Synthetic minfiensine displayed [ $\alpha$ ]<sub>D</sub><sup>23</sup> +125 (c 0.82, CHCl<sub>3</sub>), whereas [ $\alpha$ ]<sub>D</sub><sup>23</sup> +134 (c 0.82, CHCl<sub>3</sub>) is reported for natural minfiensine.<sup>13</sup>

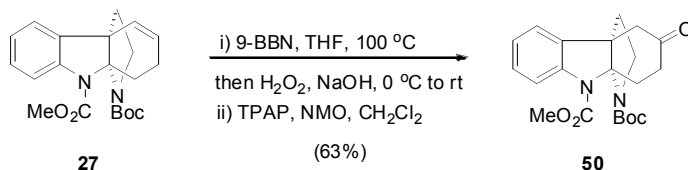

**Ketone 50.** Olefin **27** (305 mg, 0.82 mmol) and 9-BBN (0.5 M in THF, 5.0 mL, 2.50 mmol) were added to an 8 mL microwave reaction vial and capped. The reaction mixture was microwave-heated (CEM Discover System, 60 Hz and 300 W instrument) at 100 °C for 1 h. After cooling to rt, TLC analysis showed incomplete conversion. Additional 9-BBN (0.5 M in THF, 0.83 mL, 0.41 mmol) was added, and heating was continued at 100 °C for 20 min. The reaction mixture was cooled to 0 °C, and 3 N NaOH and 30% H<sub>2</sub>O<sub>2</sub> (2 mL each) were added sequentially, and the mixture was stirred at 0 °C for 10 min and at rt for an additional 30 min. The mixture was partitioned between Et<sub>2</sub>O and brine, and the separated organic phase was dried (Na<sub>2</sub>SO<sub>4</sub>), filtered, and concentrated under reduced pressure to afford a clear, colorless oil that was filtered through a plug of silica gel (50% EtOAc/hexanes). After concentration, this residue (0.82 mmol theoretical) in CH<sub>2</sub>Cl<sub>2</sub> (10 mL) was charged sequentially with crushed 4 Å molecular sieves (~1 g), TPAP (29 mg, 0.082 mmol), and NMO (985 mg, 8.2 mmol). The reaction

mixture was maintained at rt for 20 min, then concentrated to ~1 mL under reduced pressure. Purification of the crude residue by column chromatography (10% to 25% EtOAc/hexanes) gave **50** (200 mg, 0.52 mmol, 63%) as a colorless foam (**49** was isolated in 25% yield; see above for optimized procedure): **50**  $[\alpha]_{589} -157$ ,  $[\alpha]_{577} -159$ ,  $[\alpha]_{546} -183$ , (*c* 0.52, CHCl<sub>3</sub>); <sup>1</sup>H NMR (600 MHz, C<sub>6</sub>D<sub>6</sub>, 60 °C)  $\delta$  8.05 (d, *J* = 8.2 Hz, 1H), 7.05 (dt, *J* = 1.1, 8.2 Hz, 1H), 6.79 (t, *J* = 7.5 Hz, 1H), 6.69 (d, *J* = 7.2 Hz, 1H), 3.58–3.61 (m, 4H), 3.12 (ddd, *J* = 4.4, 8.0, 14.5 Hz, 1H), 2.78 (ddd, *J* = 6.1, 11.4, 17.5 Hz, 1H), 2.57 (ddd, *J* = 4.5, 9.0, 13.9 Hz, 1H), 2.35 (q, *J* = 15.2 Hz, 2H), 2.16 (ddd, *J* = 4.4, 9.0, 18.6 Hz, 1H), 1.98 (ddd, *J* = 4.5, 8.1, 18.6 Hz, 1H), 1.48 (dd, *J* = 4.9, 11.3 Hz, 1H), 1.43 (dd, *J* = 7.9, 11.3 Hz, 1H), 1.40 (s, 9H); <sup>13</sup>C NMR (150 MHz, C<sub>6</sub>D<sub>6</sub>, 60 °C)  $\delta$  206.3, 153.2, 152.3, 142.3, 133.5, 128.6, 123.2, 122.3, 115.3, 88.7, 79.3, 57.1, 51.6, 47.9, 45.3, 38.6, 34.7, 29.0, 28.0; IR (neat) 1684, 1719 cm<sup>-1</sup>; HRMS (ESI) calcd for C<sub>21</sub>H<sub>26</sub>N<sub>2</sub>O<sub>5</sub>Na [M + Na]: 409.1740. Found: 409.1732.

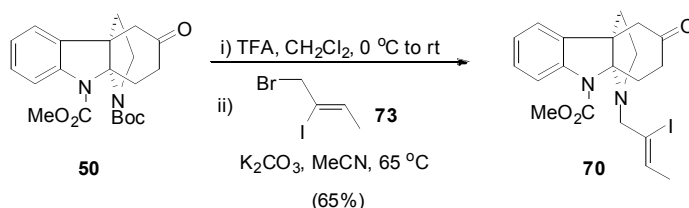

**Ketone 70.** Using procedures described above (**52** → **53** and **46** → **48**), **50** (104 mg, 0.27 mmol) was *N*-Boc deprotected (trifluoroacetic acid) to give the NH aminal: <sup>1</sup>H NMR (500 MHz, C<sub>6</sub>D<sub>6</sub>, 60 °C)  $\delta$  7.15 (br s, 1H), 7.05 (t, *J* = 7.3 Hz, 1H), 6.81 (dt, *J* = 7.6, 0.9 Hz, 1H), 6.73 (dd, *J* = 7.3, 1.3 Hz, 1H), 4.32 (s, 1H), 3.44 (br s, 3H), 2.55–2.51 (m, 2H), 2.43–2.29 (m, 3H), 2.02–1.85 (m, 3H), 1.66–1.60 (m, 1H), 1.57 (dd, *J* = 12.2, 5.4 Hz, 1H).

Subsequent alkylation with (*Z*)-1-bromo-2-iodo-2-butene (**73**)<sup>14</sup> and purification of the crude residue by column chromatography (25% EtOAc/hexanes) gave ketone **70** (81 mg, 0.17 mmol, 65% over two steps) as a clear, colorless oil:  $[\alpha]_{589} +79.4$ ,  $[\alpha]_{577} +82.8$ ,  $[\alpha]_{546} +95.0$ ,  $[\alpha]_{435} +187$ ,  $[\alpha]_{405} +246$  (*c* 0.66, CHCl<sub>3</sub>); <sup>1</sup>H NMR (500 MHz, C<sub>6</sub>D<sub>6</sub>, 60 °C)  $\delta$  7.83 (br d, *J* = 8.0 Hz, 1H), 7.03 (dt, *J* = 1.4, 7.4 Hz, 1H), 6.79 (dt, *J* = 0.9, 7.5 Hz, 1H), 6.66 (dd, *J* = 1.1, 7.5 Hz, 1H), 5.31 (q, *J* = 6.4 Hz, 1H), 4.26 (br d, *J* = 14.1 Hz, 1H), 3.43 (s, 3H), 3.13 (d, *J* = 14.3 Hz, 1H), 2.88 (dt, *J* = 4.6, 12.1 Hz, 1H), 2.65 (ddd, *J*



= 4.5, 12.1, 18.9 Hz, 1H), 2.49–2.53 (m, 2H), 2.25 (d,  $J$  = 15.6 Hz, 1H), 2.04 (dt,  $J$  = 4.1, 19.0 Hz, 1H), 1.95–2.00 (m, 1H), 1.82–1.88 (m, 1H), 1.51–1.58 (m, 2H), 1.49 (dd,  $J$  = 1.8, 6.4 Hz, 3H);  $^{13}\text{C}$  NMR (150 MHz,  $\text{C}_6\text{D}_6$ , 60 °C)  $\delta$  207.0, 154.0, 142.7, 135.0, 130.6, 128.0, 123.2, 122.5, 115.7, 111.1, 90.8, 59.7, 56.5, 51.4, 48.2, 46.7, 38.4, 35.1, 29.0, 21.1; IR (neat) 1702, 1717  $\text{cm}^{-1}$ ; HRMS (ESI) calcd for  $\text{C}_{20}\text{H}_{23}\text{IN}_2\text{O}_3\text{Na}$  [ $\text{M} + \text{Na}$ ]: 489.0651. Found: 489.0654.

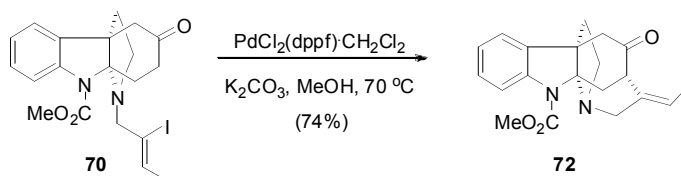

### Palladium-Catalyzed Intramolecular Enolate/Vinyl Iodide Coupling.

**Preparation of Pentacycle 72:** To a 1 dram vial was added ketone **70** (20 mg, 0.043 mmol),  $\text{PdCl}_2(\text{dppf})\cdot\text{CH}_2\text{Cl}_2$  (3.5 mg, 0.0043 mmol),  $\text{K}_2\text{CO}_3$  (24 mg, 0.17 mmol), and MeOH (1.5 ml). The vial was sealed with a Teflon septum cap, and the solution was degassed with argon for 10 min. The sealed vial was heated to 70 °C, and at this temperature, the solid  $\text{K}_2\text{CO}_3$  completely dissolved. After 1 h the reaction was cooled to rt and partitioned between  $\text{Et}_2\text{O}$  and brine. The organic phase was dried ( $\text{Na}_2\text{SO}_4$ ), filtered and concentrated under reduced pressure. Purification of the crude residue by preparative TLC (75%  $\text{EtOAc}$ /hexanes) gave pentacycle **72** (10.7 mg, 0.032 mmol, 74%) as a clear, colorless oil.  $[\alpha]_{589} +98.7$ ,  $[\alpha]_{577} +105$ ,  $[\alpha]_{546} +125$ ,  $[\alpha]_{435} +301$ ,  $[\alpha]_{405} +431$  ( $c$  1.13,  $\text{CHCl}_3$ );  $^1\text{H}$  NMR (500 MHz,  $\text{C}_6\text{D}_6$ , 60 °C)  $\delta$  7.83 (br s, 1H), 7.07 (dt,  $J$  = 1.4, 7.4 Hz, 1H), 6.79 (dt,  $J$  = 1.0, 7.4 Hz, 1H), 6.68 (dd,  $J$  = 1.3, 7.4 Hz, 1H), 5.27 (q,  $J$  = 6.8 Hz, 1H), 4.27 (br s, 1H), 3.49 (s, 3H), 3.05 (br s, 1H), 2.93 (d,  $J$  = 16.2 Hz, 1H), 2.77 (ddd,  $J$  = 2.4, 7.5, 9.8 Hz, 1H), 2.54–2.60 (m, 2H), 2.48 (s, 2H), 1.79 (dd,  $J$  = 1.8, 6.4 Hz, 3H), 1.66–1.73 (m, 2H), 1.50 (ddd,  $J$  = 2.4, 6.1, 12.6 Hz, 1H);  $^{13}\text{C}$  NMR (125 MHz,  $\text{C}_6\text{D}_6$ , 60 °C)  $\delta$  207.7, 153.6, 135.6, 134.7, 128.5, 127.4, 122.8, 122.7, 122.1, 115.5, 91.4, 56.1, 53.3, 52.8, 51.5, 47.7, 44.3, 40.6, 26.9, 14.3; IR (neat) 1694  $\text{cm}^{-1}$ ; HRMS (ESI) calcd for  $\text{C}_{20}\text{H}_{22}\text{N}_2\text{O}_3\text{Na}$  [ $\text{M} + \text{Na}$ ]: 361.1528. Found: 361.1531.

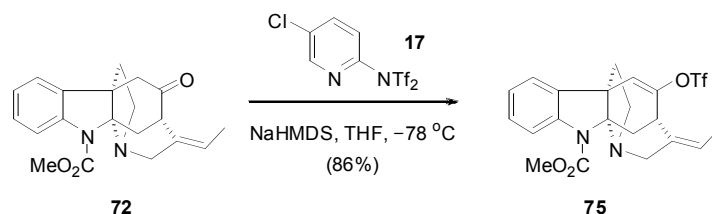

**Triflate 62.** A THF solution of NaHMDS (90  $\mu\text{L}$  of a 2.0 M solution, 0.18 mmol) was added dropwise to a solution of **72** (30 mg, 0.089 mmol), 2-[*N,N*-bis(trifluoromethylsulfonyl)amino]-5-chloropyridine (70 mg, 0.18 mmol), and THF (2 mL) at  $-78\text{ }^{\circ}\text{C}$  under Ar. After 15 min, TLC analysis indicated incomplete conversion. Additional 2-[*N,N*-bis(trifluoromethylsulfonyl)amino]-5-chloropyridine (18 mg, 0.045 mmol) and NaHMDS (25  $\mu\text{L}$  of a 2.0 M solution, 0.045 mmol) were added, and the reaction was stirred at  $-78\text{ }^{\circ}\text{C}$  for 20 min. At this time, TLC indicated complete conversion, and the reaction was then quenched with saturated aqueous  $\text{NH}_4\text{Cl}$  and warmed to rt. The separated aqueous phase was washed with  $\text{Et}_2\text{O}$ , and the combined organic phases were dried ( $\text{Na}_2\text{SO}_4$ ), filtered, and concentrated under reduced pressure. Purification of the crude residue by preparative TLC (50%  $\text{EtOAc}$ /hexanes) gave **75** (36 mg, 0.077 mmol, 86%) as a clear, colorless oil:  $[\alpha]_{589} -14.0$ ,  $[\alpha]_{577} -15.2$ ,  $[\alpha]_{546} -17.2$ ,  $[\alpha]_{435} -23.6$ ,  $[\alpha]_{405} -26.3$  ( $c$  0.92,  $\text{CHCl}_3$ );  $^1\text{H}$  NMR (500 MHz,  $\text{C}_6\text{D}_6$ ,  $60\text{ }^{\circ}\text{C}$ )  $\delta$  7.92 (br s, 1H), 7.05 (dt,  $J = 1.4, 7.4\text{ Hz}$ , 1H), 6.81 (dd,  $J = 1.1, 7.2\text{ Hz}$ , 1H), 6.76 (t,  $J = 7.4\text{ Hz}$ , 1H), 5.68 (s, 1H), 5.15 (q,  $J = 6.9\text{ Hz}$ , 1H), 4.00 (br s, 1H), 3.47 (s, 3H), 3.13 (br s, 1H), 2.77–2.82 (m, 2H), 2.45 (ddd,  $J = 5.8, 8.7, 14.3\text{ Hz}$ , 1H), 2.34 (br s, 1H), 1.71 (ddd,  $J = 7.3, 12.6, 12.6\text{ Hz}$ , 1H), 1.58 (dd,  $J = 2.1, 6.9\text{ Hz}$ , 3H), 1.55 (dd,  $J = 2.9, 13.2\text{ Hz}$ , 1H), 1.38 (dd,  $J = 5.7, 12.5\text{ Hz}$ , 1H);  $^{13}\text{C}$  NMR (125 MHz,  $\text{C}_6\text{D}_6$ ,  $60\text{ }^{\circ}\text{C}$ )  $\delta$  153.5, 153.0, 140.1, 133.4, 131.4, 128.8, 122.8, 122.6, 122.1, 119.0 (q,  $J_{\text{C,F}} = 319\text{ Hz}$ ), 115.7, 115.3, 90.6, 56.3, 52.2, 51.64, 51.60, 37.9, 34.9, 27.7, 13.7; IR (neat)  $1698\text{ cm}^{-1}$ ; HRMS (ESI) calcd for  $\text{C}_{21}\text{H}_{22}\text{F}_3\text{N}_2\text{O}_5\text{S}$  [ $\text{M} + \text{H}$ ]: 471.1201. Found: 471.1193.

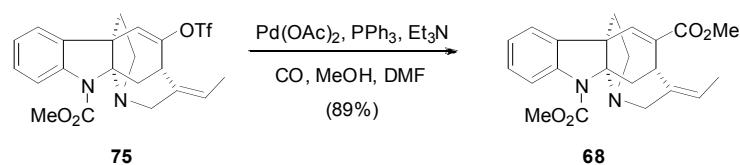

**Enoate 56.** To a 1 dram vial was added triflate **75** (34 mg, 0.072 mmol), Pd(OAc)<sub>2</sub> (5 mg, 0.022 mmol), PPh<sub>3</sub> (11 mg, 0.43 mmol), Et<sub>3</sub>N (30 μl, 0.22 mmol), MeOH (1 ml), and DMF (1 ml). The vial was sealed with a Teflon septum cap, and the solution was degassed with a balloon of CO for 5 min. The sealed vial was then heated to 50 °C under a balloon of CO. After 3.5 h the reaction was cooled to rt and partitioned between Et<sub>2</sub>O and brine. The organic phase was washed an additional time with brine, dried (Na<sub>2</sub>SO<sub>4</sub>), filtered and concentrated under reduced pressure. Purification of the crude residue by preparative TLC (50% EtOAc/hexanes) gave methyl ester **68** (24 mg, 0.064 mmol, 89%) as a colorless oil. The <sup>1</sup>H and <sup>13</sup>C NMR of **68** were identical to the spectral values reported above.

## References.

1. Kondo, Y.; Kojima, S.; Sakamoto, T. *J. Org. Chem.* **1997**, *62*, 6507–6511.
2. Ohashi, M.; Takahashi, T.; Inoue, S.; Sato, K. *Bull. Chem. Soc. Jpn.* **1975**, *48*, 1892–1896.
3. Because of carbamate rotomers, most  $^1\text{H}$  and  $^{13}\text{C}$  NMR spectra in Supporting Information were conducted in  $d_6$ -benzene at 60 °C.
4. Hart, R. *Bull. Soc. Chim. Belg.* **1956**, *65*, 291–296.
5. Cesium carbonate and cesium fluoride were dried in a vacuum oven set to 120 °C for 24 h.
6. Loiseleur, O.; Meier, P.; Pfaltz, A. *Angew. Chem. Int. Ed.* **1996**, *35*, 200–202.
7. For X-ray crystallographic analysis data, see accompanying cif file.
8. Sharpless, K.B.; Lauer, R.F. *J. Am. Chem. Soc.* **1973**, *95*, 2697–2699.
9. Rawal, V.H.; Michoud, C. *Tetrahedron Lett.* **1991**, *32*, 1695–1698.
10. Nicolaou, K.C.; Zhong, Y.-L.; Baran, P.S. *J. Am. Chem. Soc.* **2000**, *122*, 7596–7597.
11. Copies of  $^1\text{H}$  and  $^{13}\text{C}$  NMR data for **63** are presented as a mixture with **48** in Supporting Information, see page S81.
12. Brown, L.; Koreeda, M. *J. Org. Chem.* **1984**, *49*, 3875–3880.
13. Massiot, G.; Thépenier, P.; Jacquier, M.; Le Men-Olivier, L.; Delaude, C. *Heterocycles* **1989**, *29*, 1435–1438.
14. Rawal, V.H.; Michoud, C.; Monestel, R.F. *J. Am. Chem. Soc.* **1993**, *115*, 3030–3031.

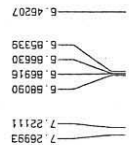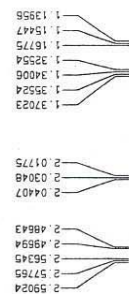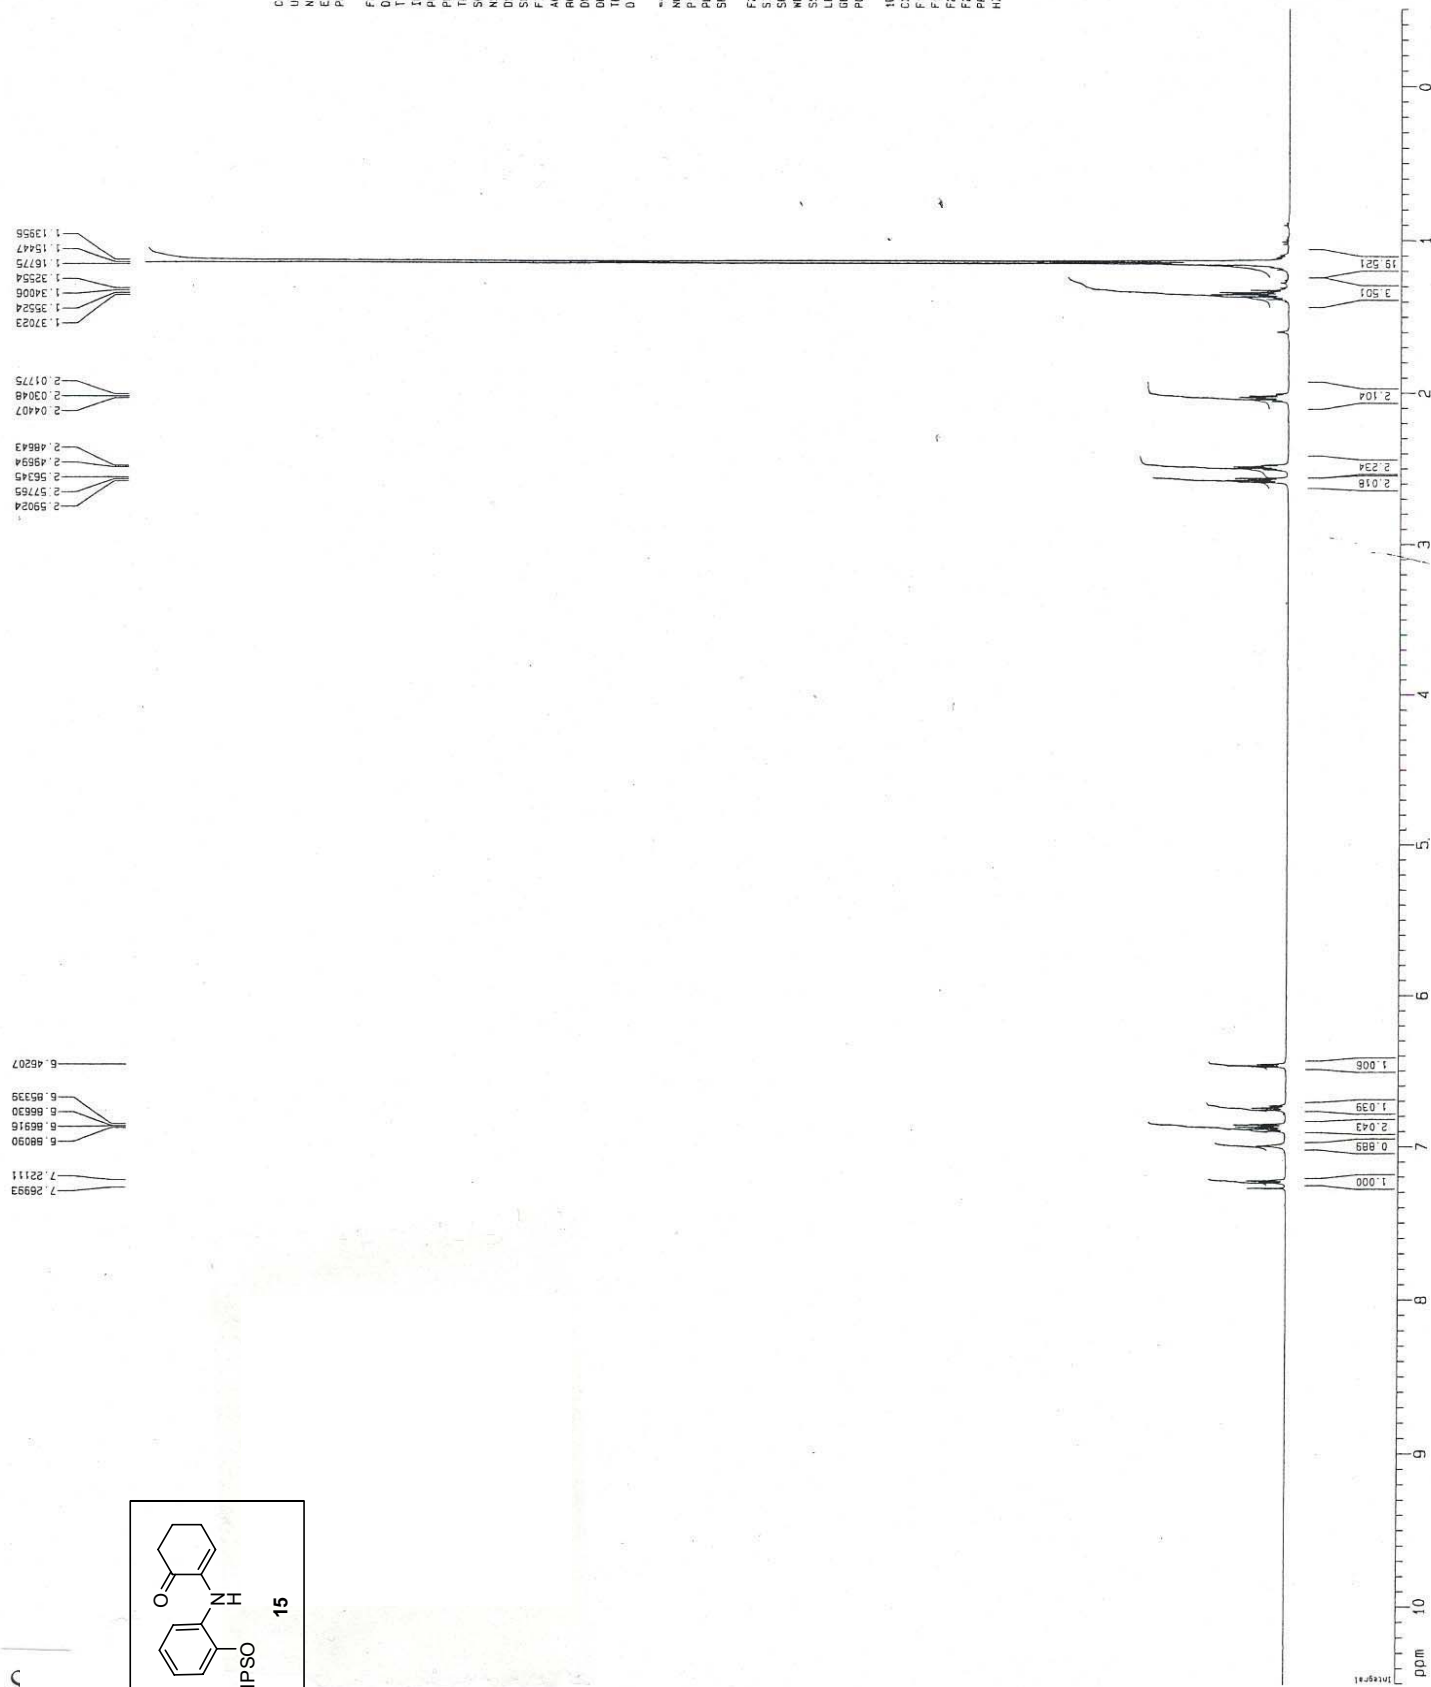

<sup>13</sup>C spectrum with <sup>1</sup>H decoupling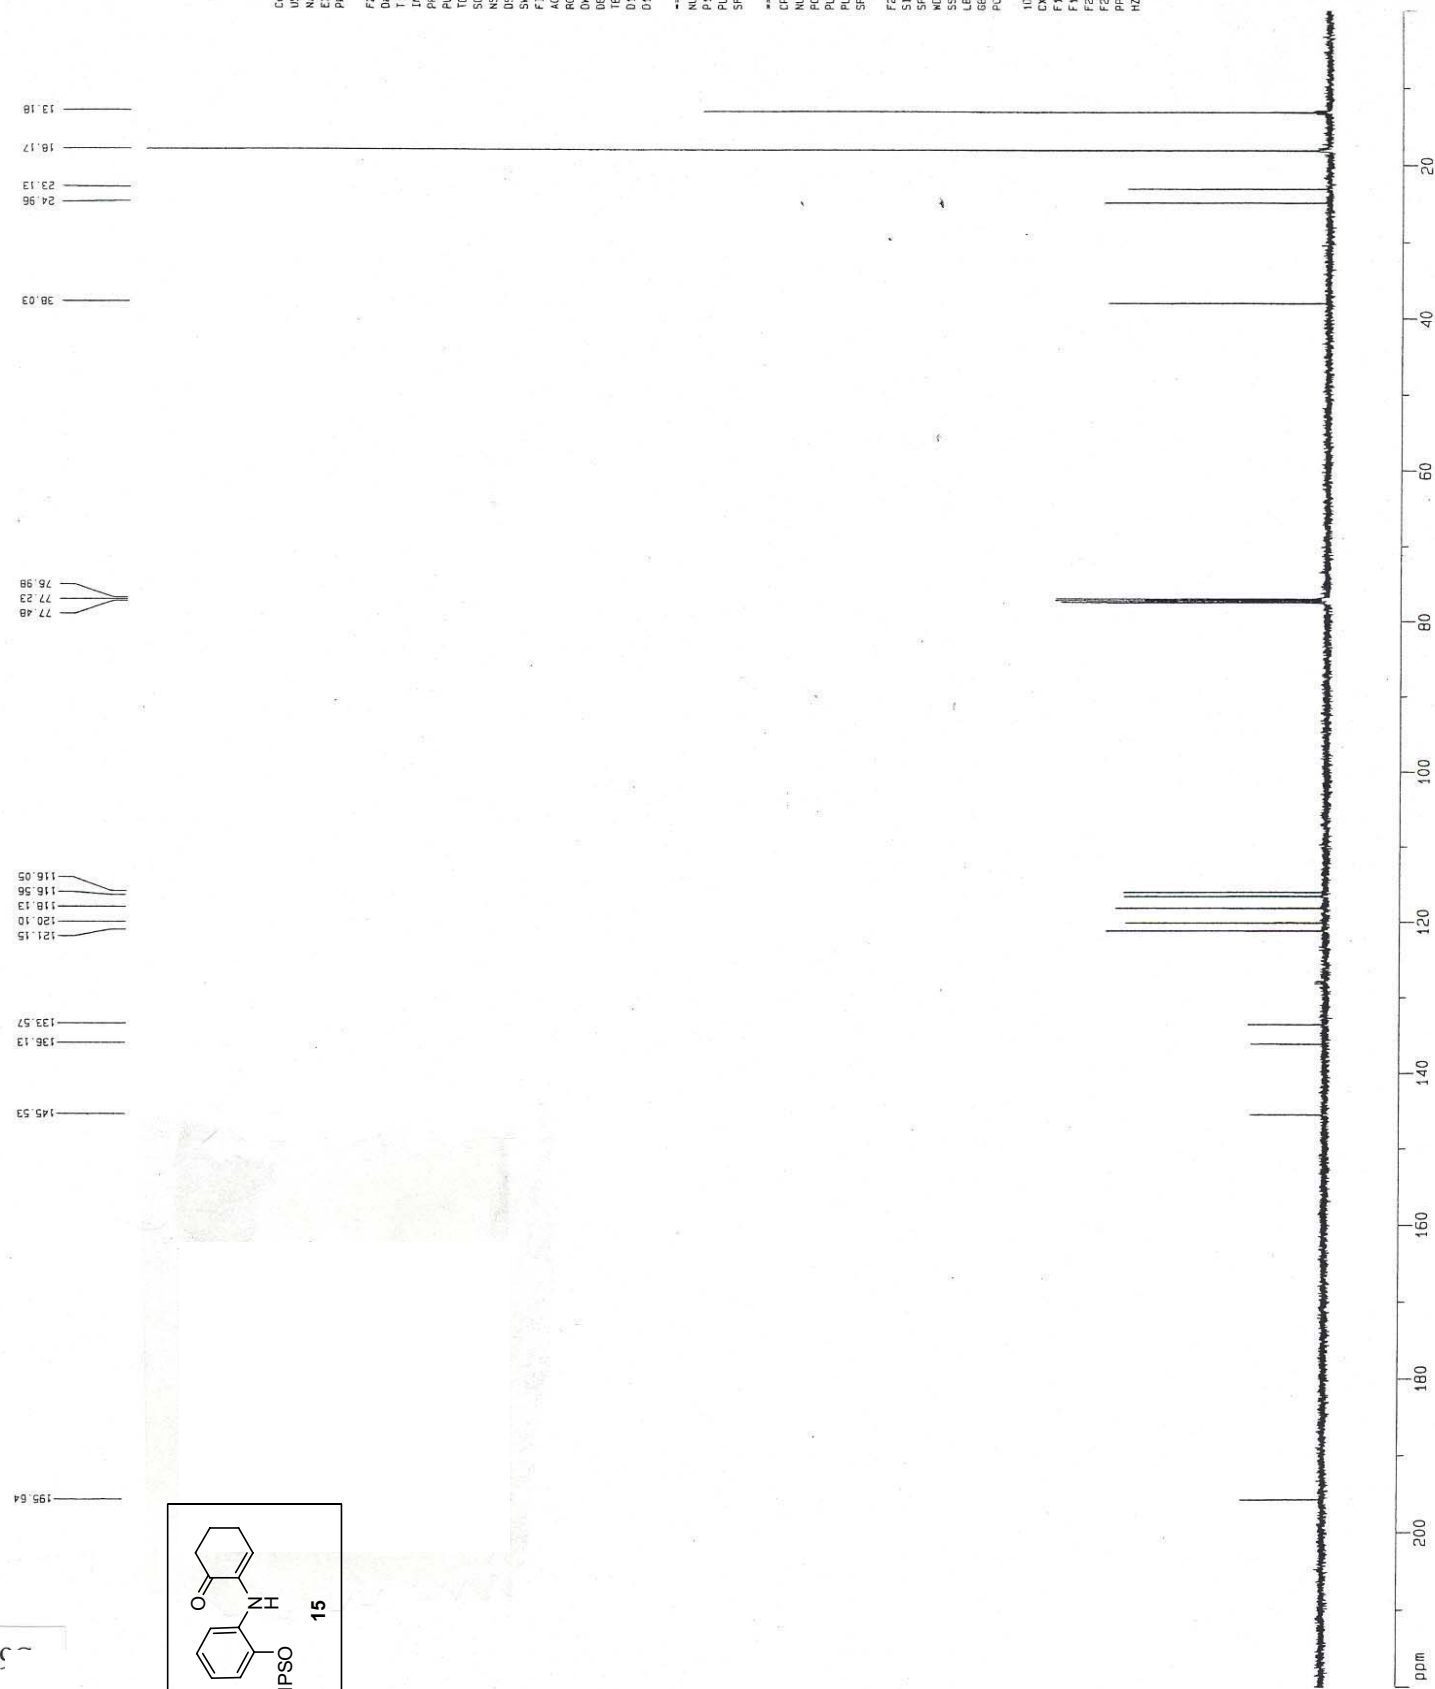

1.31065  
1.29587  
1.28056  
1.26641  
1.15604  
1.14138

3.48342

7.16001  
6.96861  
6.96674  
6.93537  
6.73669

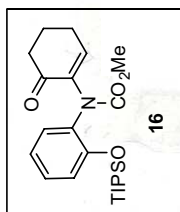

Current Data Parameters  
 USER dounay  
 NAME 800-1V-57  
 EXPNO 1  
 PROCNO 1

F2 - Acquisition Parameters  
 Date\_ 20040218  
 Time 14.37  
 INSTRUM omega500  
 PROBHD 5 mm D700000  
 PULPROG zg30  
 TD 65536  
 SOLVENT CDCl3  
 NS 1  
 DS 2  
 SFO1 801.282000 MHz  
 FIDRES 0.122266 Hz  
 AQ 4.0854956 sec  
 RG 256  
 DM 62.400 usec  
 DE 6.00 usec  
 TE 303.0 K  
 D1 0.1000000 sec

\*\*\*\*\* CHANNEL f1 \*\*\*\*\*  
 NUC1 1H  
 P1 13.00 usec  
 PL1 -1.00 dB  
 SFO1 500.2235015 MHz

F2 - Processing parameters  
 SI 65536  
 SF 500.2199990 MHz  
 EQ C4  
 SSF 0.00 Hz  
 LB 0.30 Hz  
 GB 0  
 PC 4.00

1D NMR plot parameters  
 CX 22.80 cm  
 FIP 10.500 ppm  
 F1 6252.31 Hz  
 F2p -0.500 ppm  
 F2 -250.11 Hz  
 PPMCM 0.48246 ppm/cm  
 HZCM 241.33421 Hz/cm

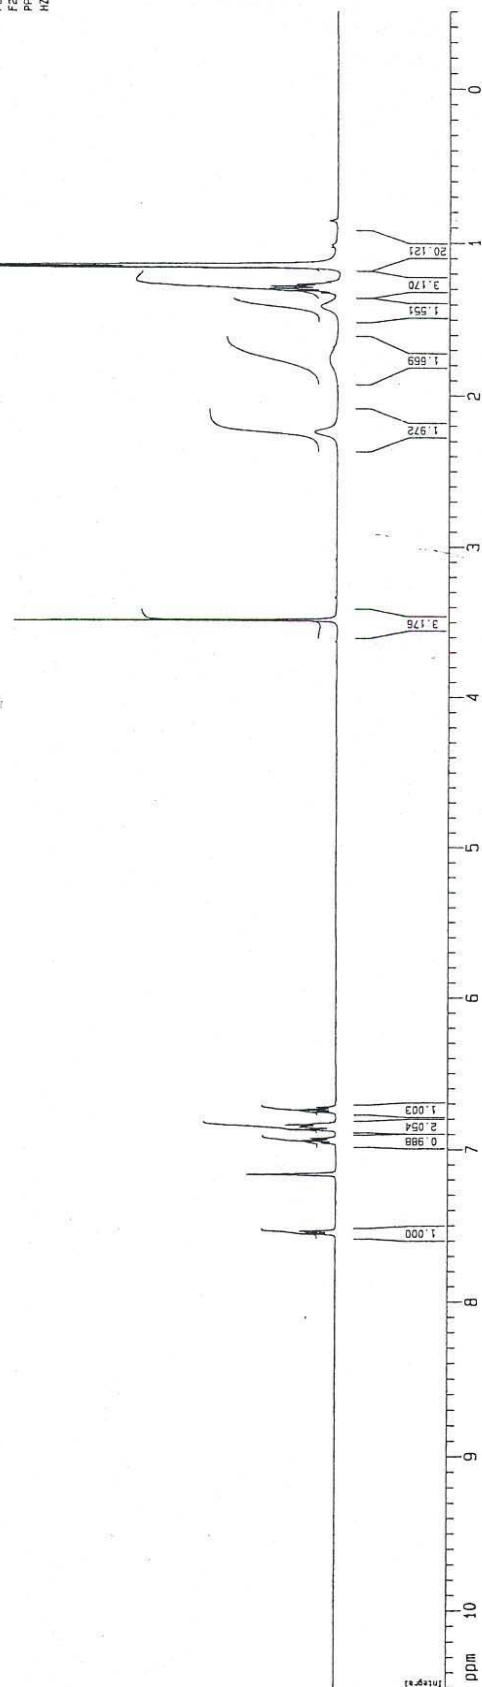

<sup>13</sup>C spectrum with <sup>1</sup>H decoupling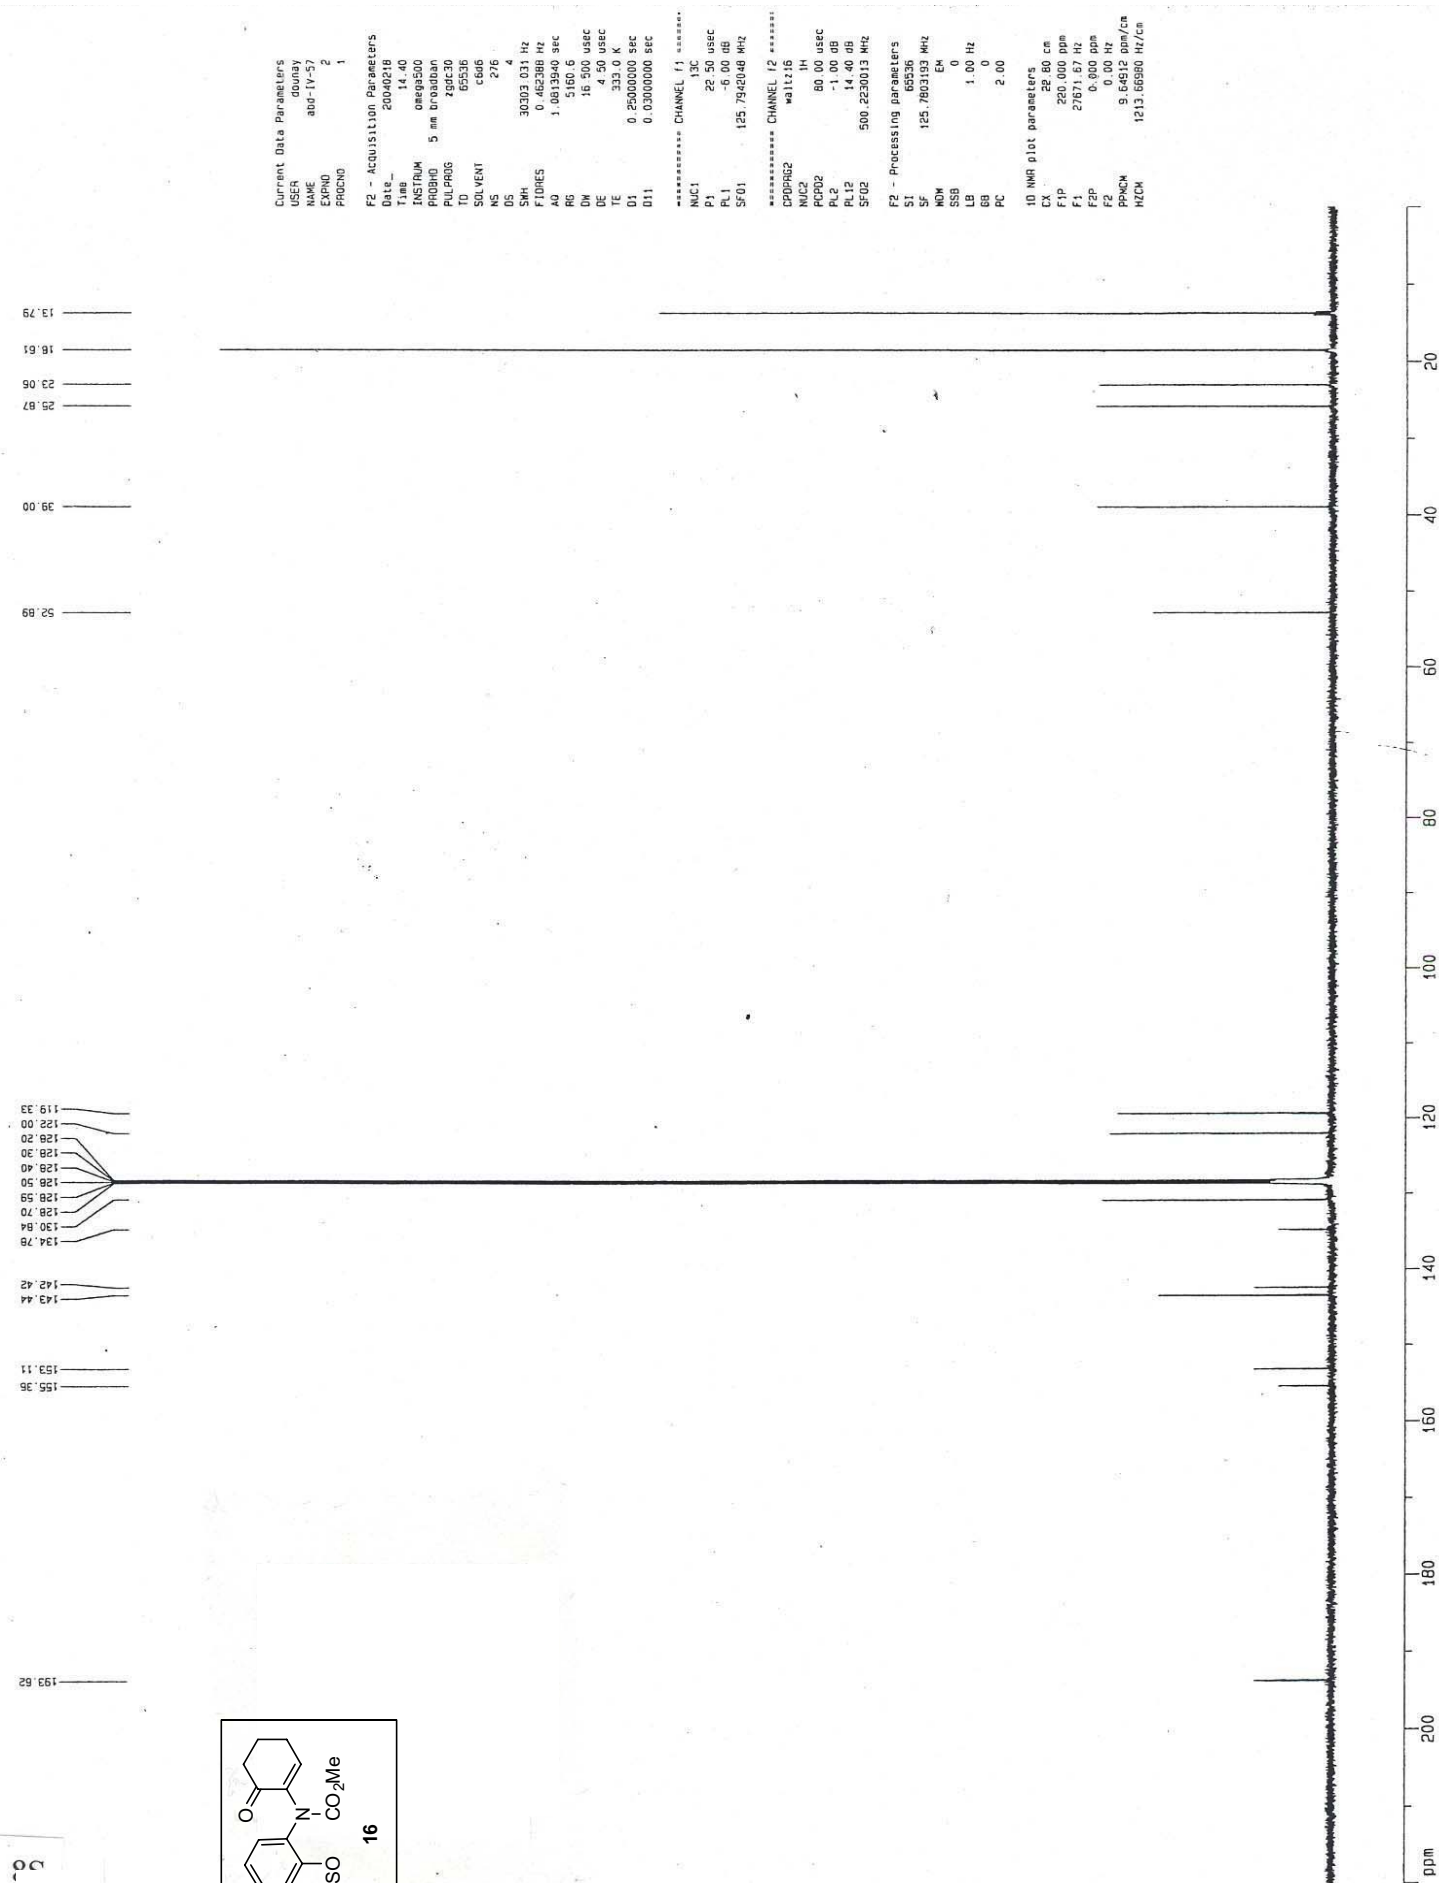



<sup>1</sup>H spectrum

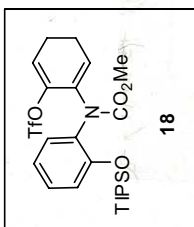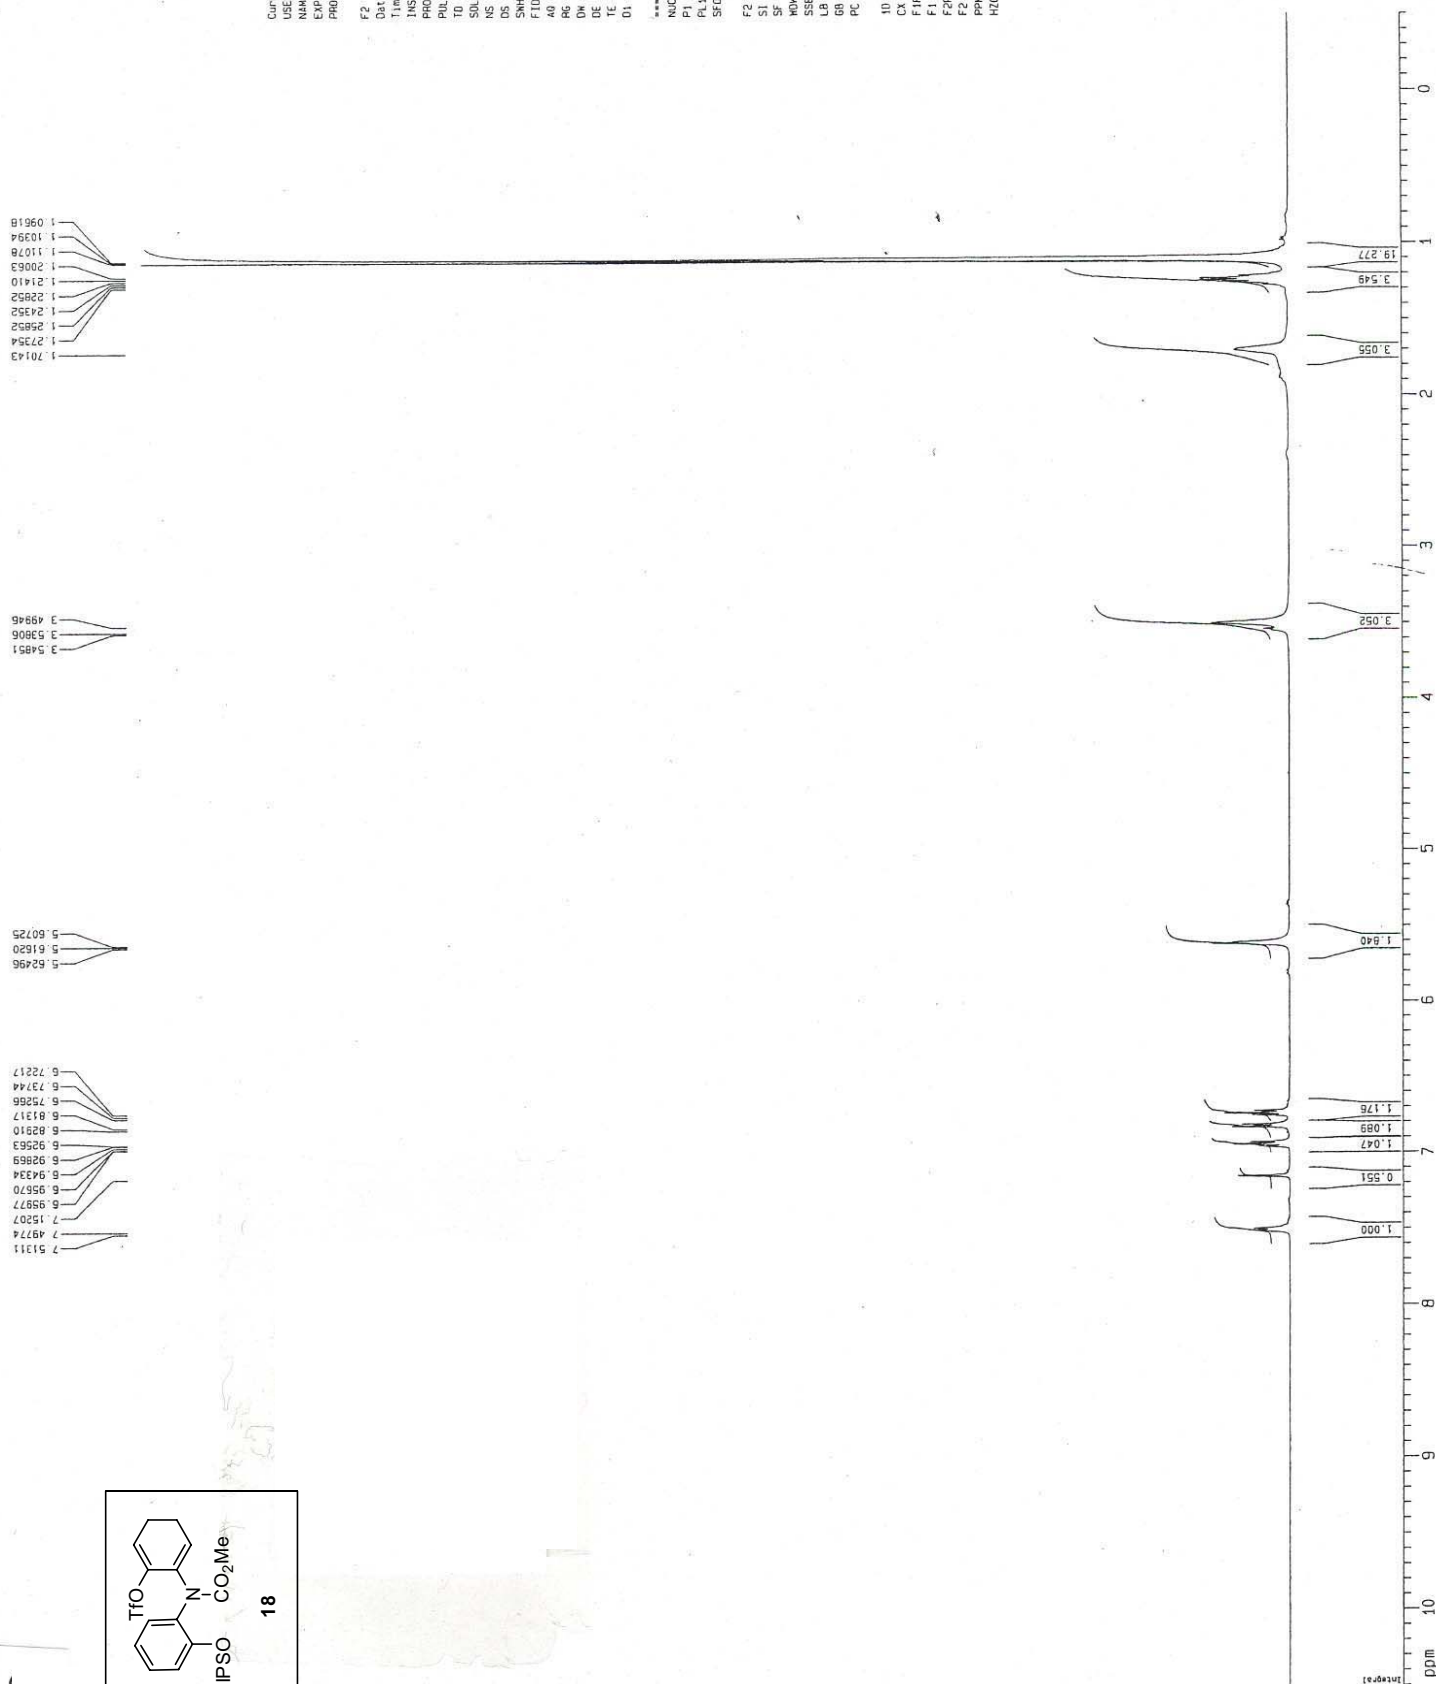

Current Data Parameters  
 USER dounay  
 NAME abd-111-256-3  
 EXPNO 1  
 PROCNO 1

F2 - Acquisition Parameters  
 Date\_ 20040114  
 Time 18.14  
 INSTRUM gn500  
 PROBHD 5 mm broadband  
 PULPROG zg30  
 TO 65535  
 SOLVENT CDCl3  
 DS 2  
 SWH 8012.820 Hz  
 FIDRES 0.122265 Hz  
 AQ 4.0894865 sec  
 RG 20.2  
 DM 62.400 usec  
 DE 6.00 usec  
 TE 300.0 K  
 D1 0.10000000 sec

\*\*\*\*\* CHANNEL f1 \*\*\*\*\*  
 NUC1 1H  
 P1 12.00 usec  
 PL1 -3.00 dB  
 SF01 500.1355010 MHz

F2 - Processing parameters  
 SI 65536  
 SF 500.1355010 MHz  
 DS 2  
 SSF 0  
 LB 0.30 Hz  
 GB 0  
 PC 4.00

1D NMR plot parameters  
 CX 22.80 cm  
 FIP 10.500 gpa  
 F1 5251.57 Hz  
 F2P -0.500 gpa  
 F2 -250.07 Hz  
 PPHCM 0.48246 gpa/cm  
 HZCM 241.30045 Hz/cm

<sup>13</sup>C spectrum with <sup>1</sup>H decoupling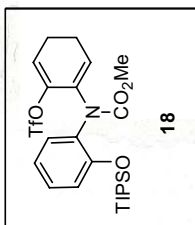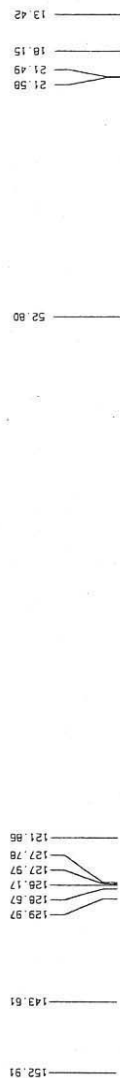

Current Data Parameters  
 USER dounay  
 NAME abd-III-258XX  
 EXPNO 2  
 PROCNO 1

F2 - Acquisition Parameters  
 Date\_ 20040116  
 Time 13.23  
 INSTRUM omega500  
 PROBHD 5 mm broadband  
 PULPROG zgpg30  
 TD 65536  
 SOLVENT CDCl3  
 NS 400  
 DS 4  
 SWH 30303.051 Hz  
 FIDRES 0.062388 Hz  
 AQ 1.0913600 sec  
 RG 2560.3  
 DW 16.500 usec  
 DE 4.50 usec  
 TE 300.0 K  
 D1 0.25000000 sec  
 D11 0.03000000 sec

===== CHANNEL f1 =====  
 NUC1 <sup>13</sup>C  
 P1 22.50 usec  
 PL1 -6.00 dB  
 SF01 125.7942048 MHz

===== CHANNEL f2 =====  
 CPDPRG2 waltz16  
 NUC2 <sup>1</sup>H  
 PCPD2 80.00 usec  
 PL2 -1.00 dB  
 PL12 14.40 dB  
 SF02 500.2250013 MHz

F2 - Processing parameters  
 SI 65536  
 SF 125.780350 MHz  
 MDW 64  
 EN 0  
 SSB 0  
 LB 1.00 Hz  
 GB 0  
 PC 2.00

1D NMR plot parameters  
 CX 22.80 cm  
 FIP 220.000 pps  
 F1 27571.68 Hz  
 F2P 0.000 pps  
 F2 0.00 Hz  
 PPMCM 9.64912 pps/cm  
 HZCM 1213.67059 Hz/cm

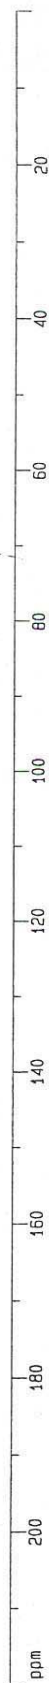

<sup>1</sup>H spectrum

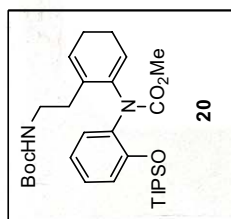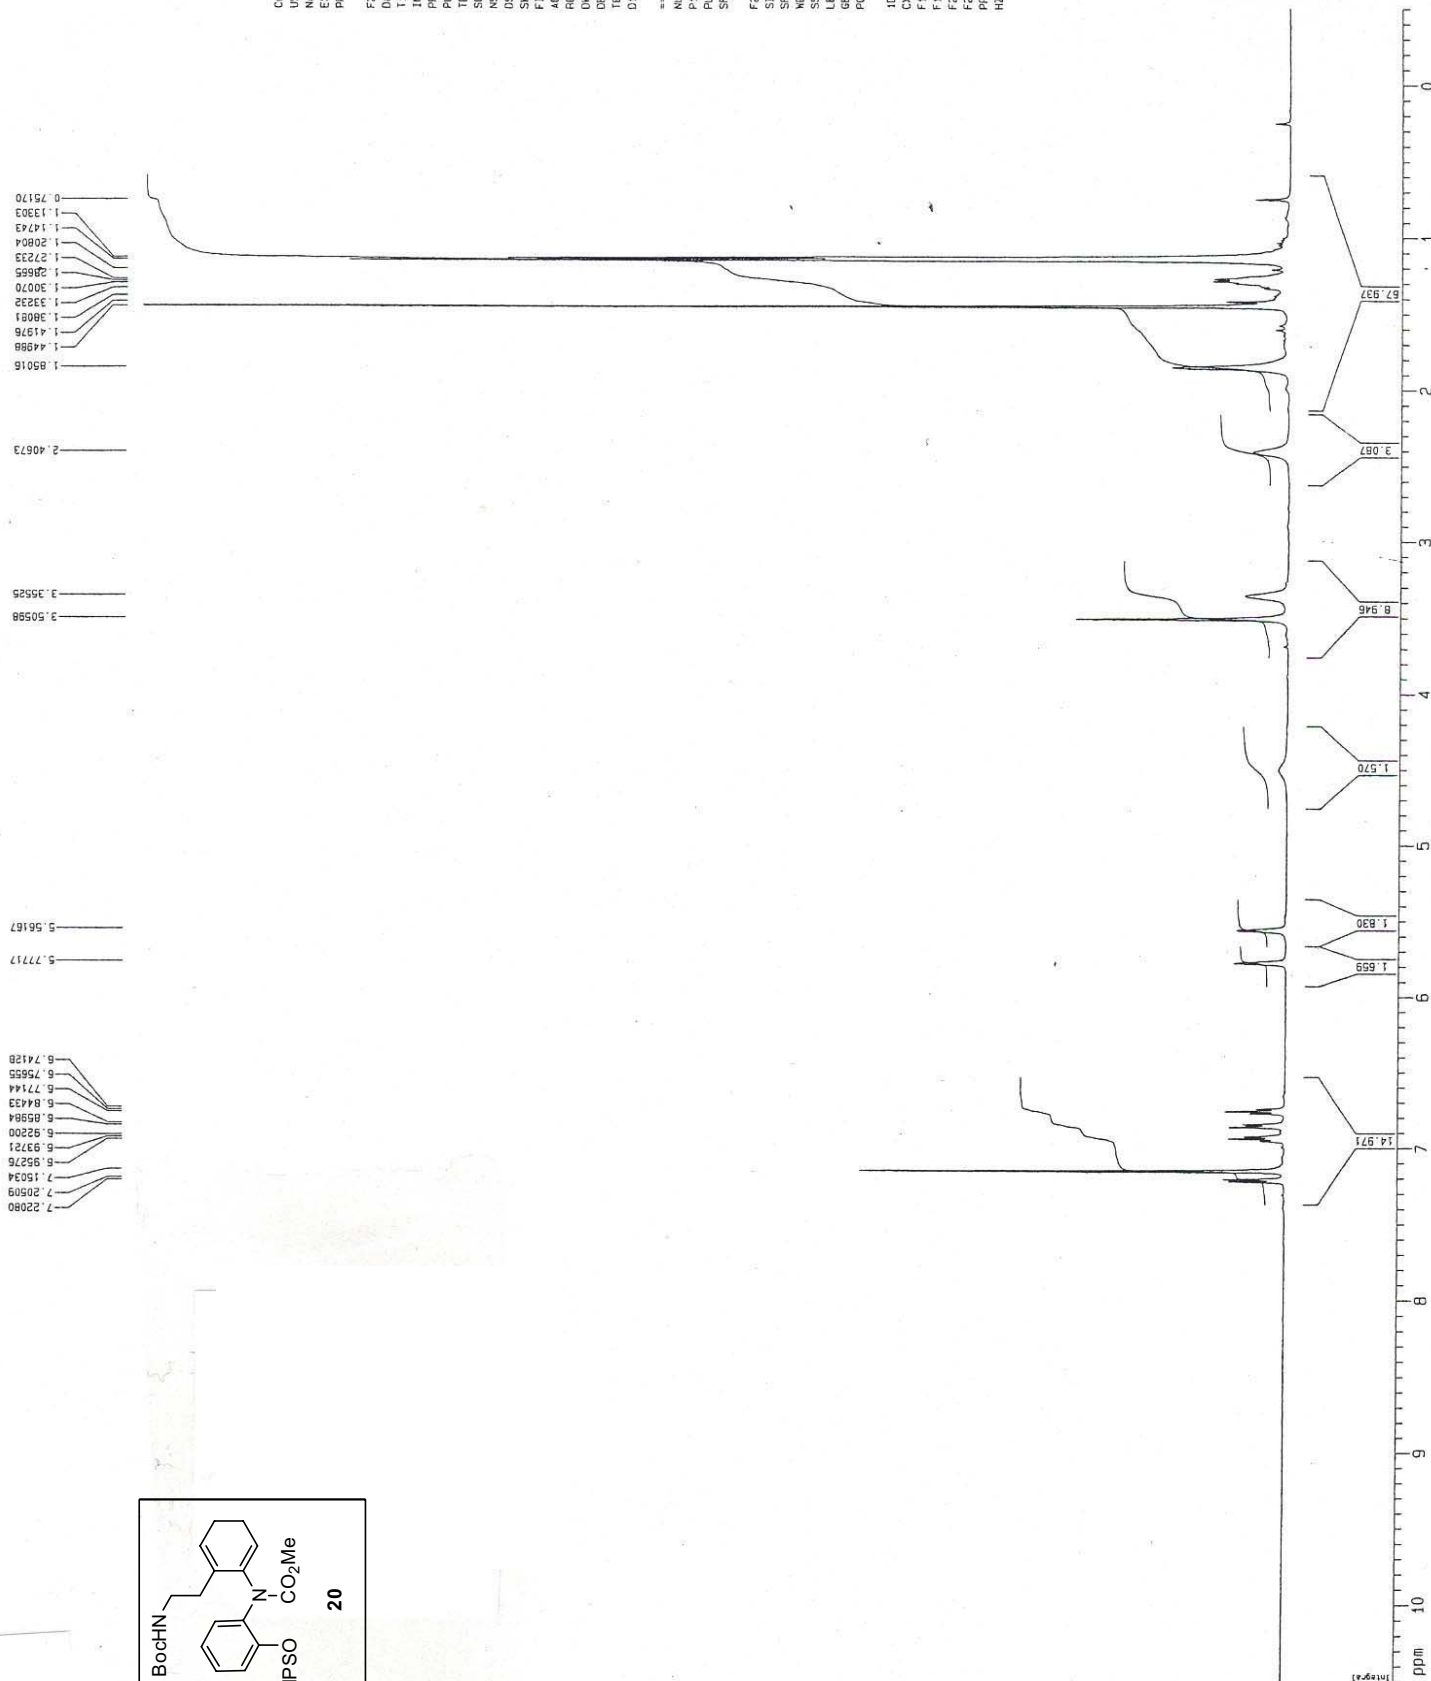

Current Data Parameters  
 USER dounay  
 NAME abd-11-200-1  
 EXPNO 1  
 PROCNO 1

F2 - Acquisition Parameters  
 Date\_ 20030724  
 Time 13:22  
 INSTRUM spect  
 PROBHD 5 mm broadband  
 PULPROG zgpg30  
 TO 65935  
 SOLVENT CDCl3  
 NS 1  
 DS 2  
 SWH 8012.620 Hz  
 FIDRES 0.122266 Hz  
 AQ 4.0894966 sec  
 RG 181  
 DW 62.400 usec  
 DE 6.00 usec  
 TE 300.2 K  
 D1 0.10000000 sec

===== CHANNEL f1 =====  
 NUC1 1H  
 P1 12.00 usec  
 PL1 -3.00 dB  
 SF01 499.834698 MHz

F2 - Processing parameters  
 SI 32768  
 SF 499.830000 MHz  
 WDW EM  
 SSF 0  
 LB 0.30 Hz  
 GB 0  
 PC 4.00

1D NMR plot parameters  
 CX 22.80 cm  
 F1P 10.500 ppm  
 F1 5248.21 Hz  
 F2P -0.500 ppm  
 F2 -249.51 Hz  
 PPH0H 0.48246 ppm/cm  
 HZ0H 241.14606 Hz/cm

<sup>13</sup>C spectrum with <sup>1</sup>H decoupling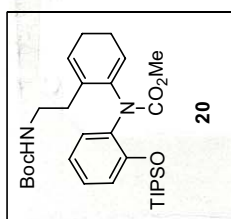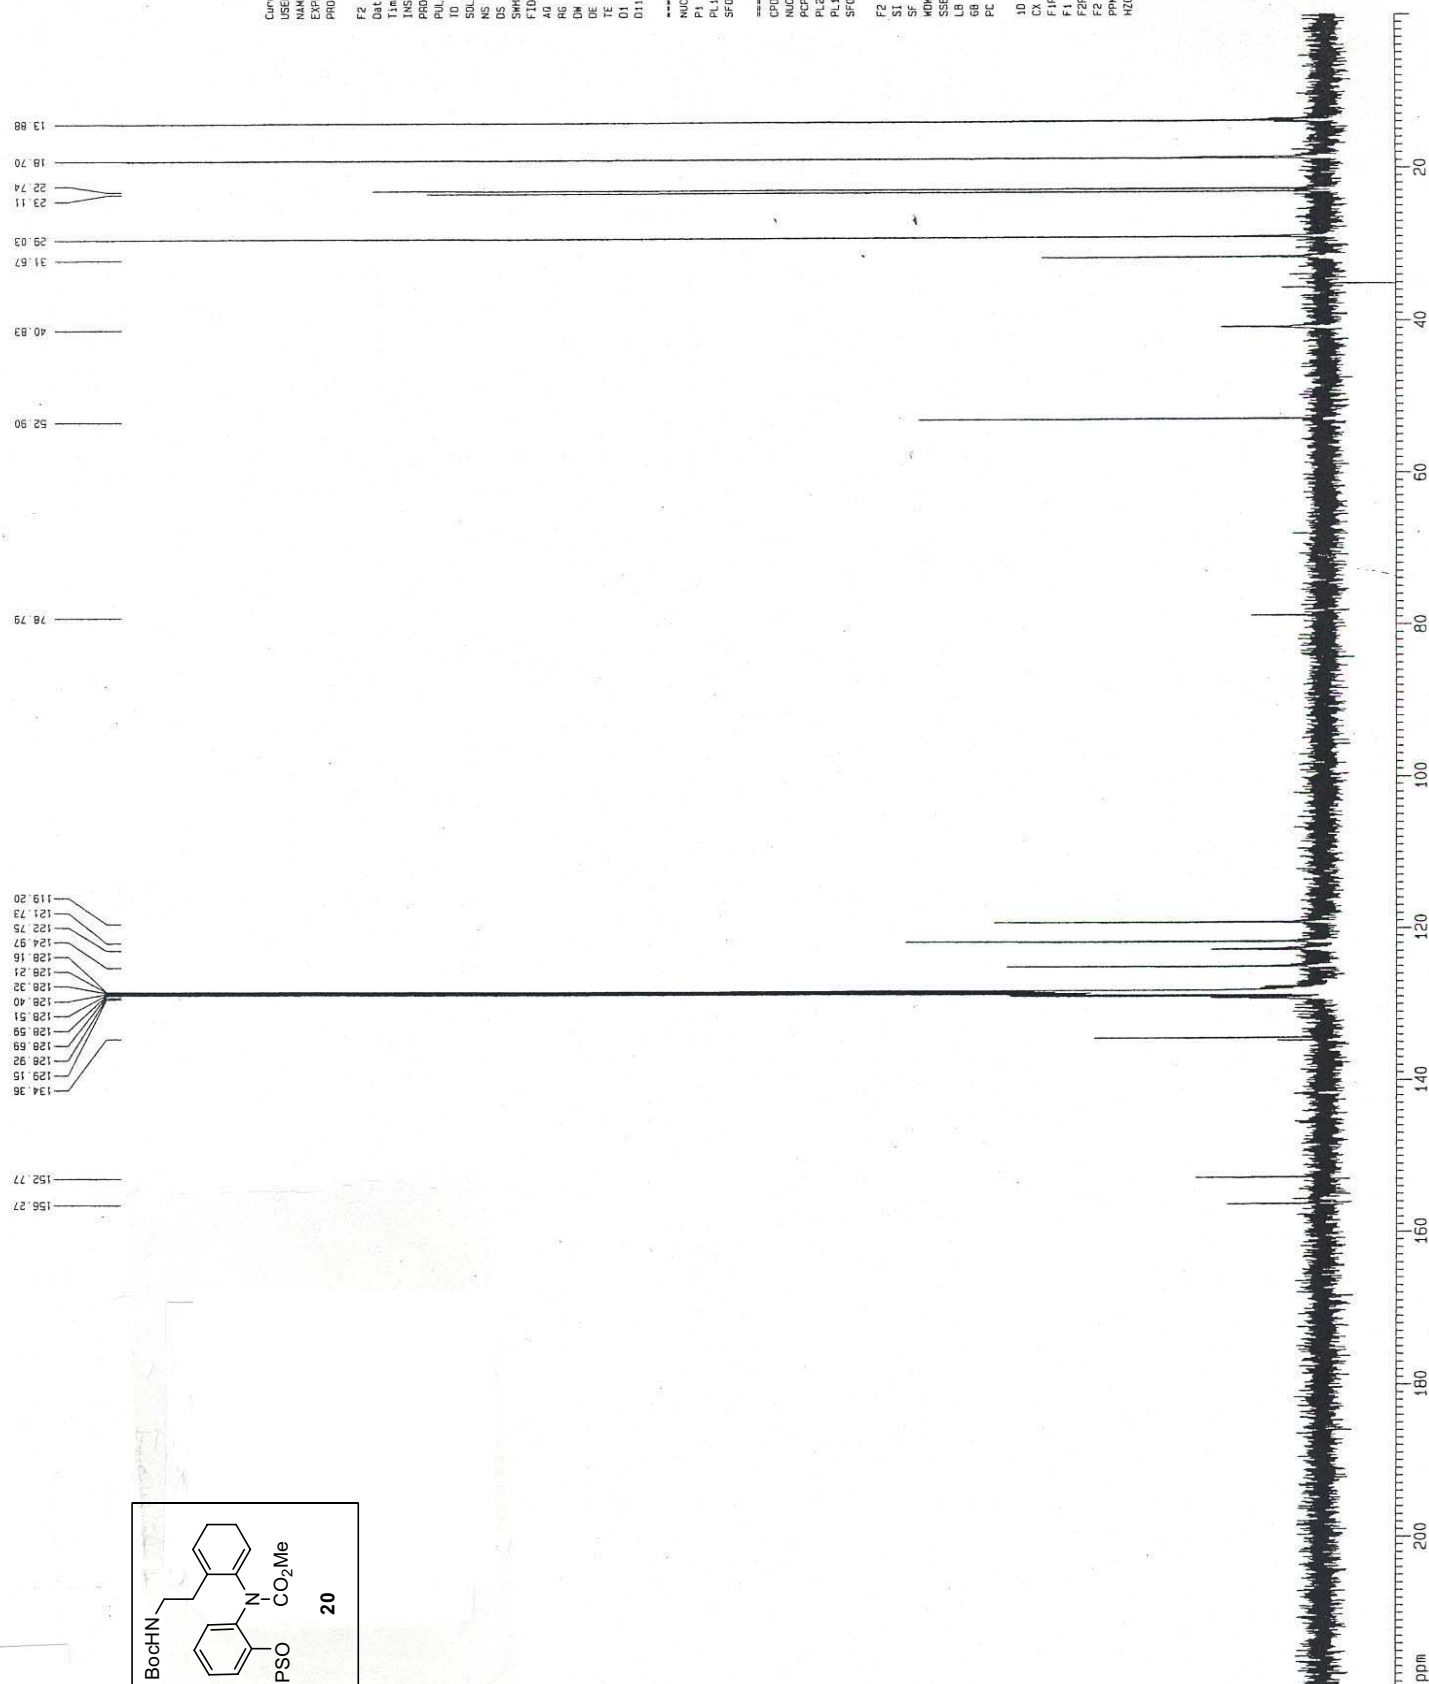

<sup>1</sup>H spectrum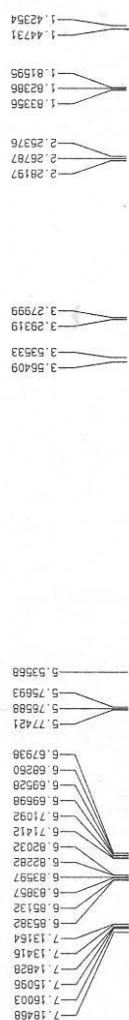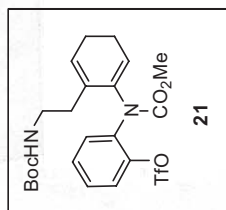

Current Data Parameters  
 USER aaronw  
 NAME abd-111-270-2  
 EXPNO 1  
 PROCNO 1

F2 - Acquisition Parameters  
 Date\_ 20031229  
 Time 15.10  
 INSTRUM omega500  
 PROBHD 5 mm broadband  
 PULPROG zgpg30  
 TD 65536  
 SOLVENT CDCl<sub>3</sub>  
 NS 2  
 DS 2  
 SWH 8012.820 Hz  
 FIDRES 0.122266 Hz  
 AQ 4.0894866 sec  
 RG 128  
 DW 62.400 usec  
 DE 6.00 usec  
 TE 300.0 K  
 D1 0.1000000 sec

===== CHANNEL f1 =====  
 NUC1 <sup>1</sup>H  
 P1 13.00 usec  
 PL1 -1.00 dB  
 SF01 500.2235015 MHz

F2 - Processing parameters  
 SI 65536  
 SF 500.2199972 MHz  
 WMW EN  
 SSB 0  
 LB 0.30 Hz  
 GB 0  
 PC 4.00

1D NMR plot parameters  
 CX 32.80 cm  
 CY 45.20 cm  
 F1 10.000 ppm  
 F2 5002.20 Hz  
 F3 -1.000 ppm  
 F4 -500.22 Hz  
 PRNOM 0.48246 ppm/cm  
 HZCM 241.33421 Hz/cm

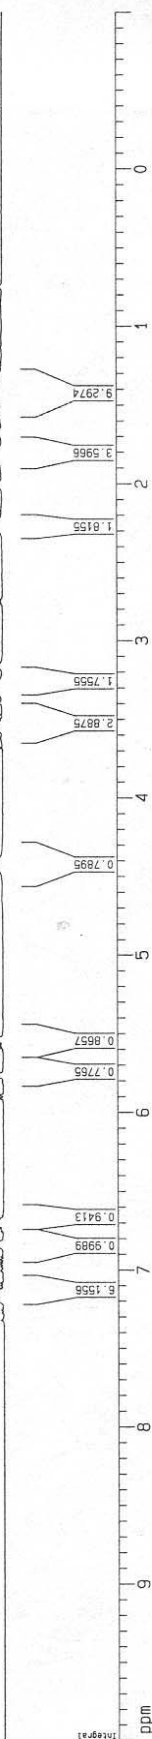

<sup>13</sup>C spectrum with <sup>1</sup>H decoupling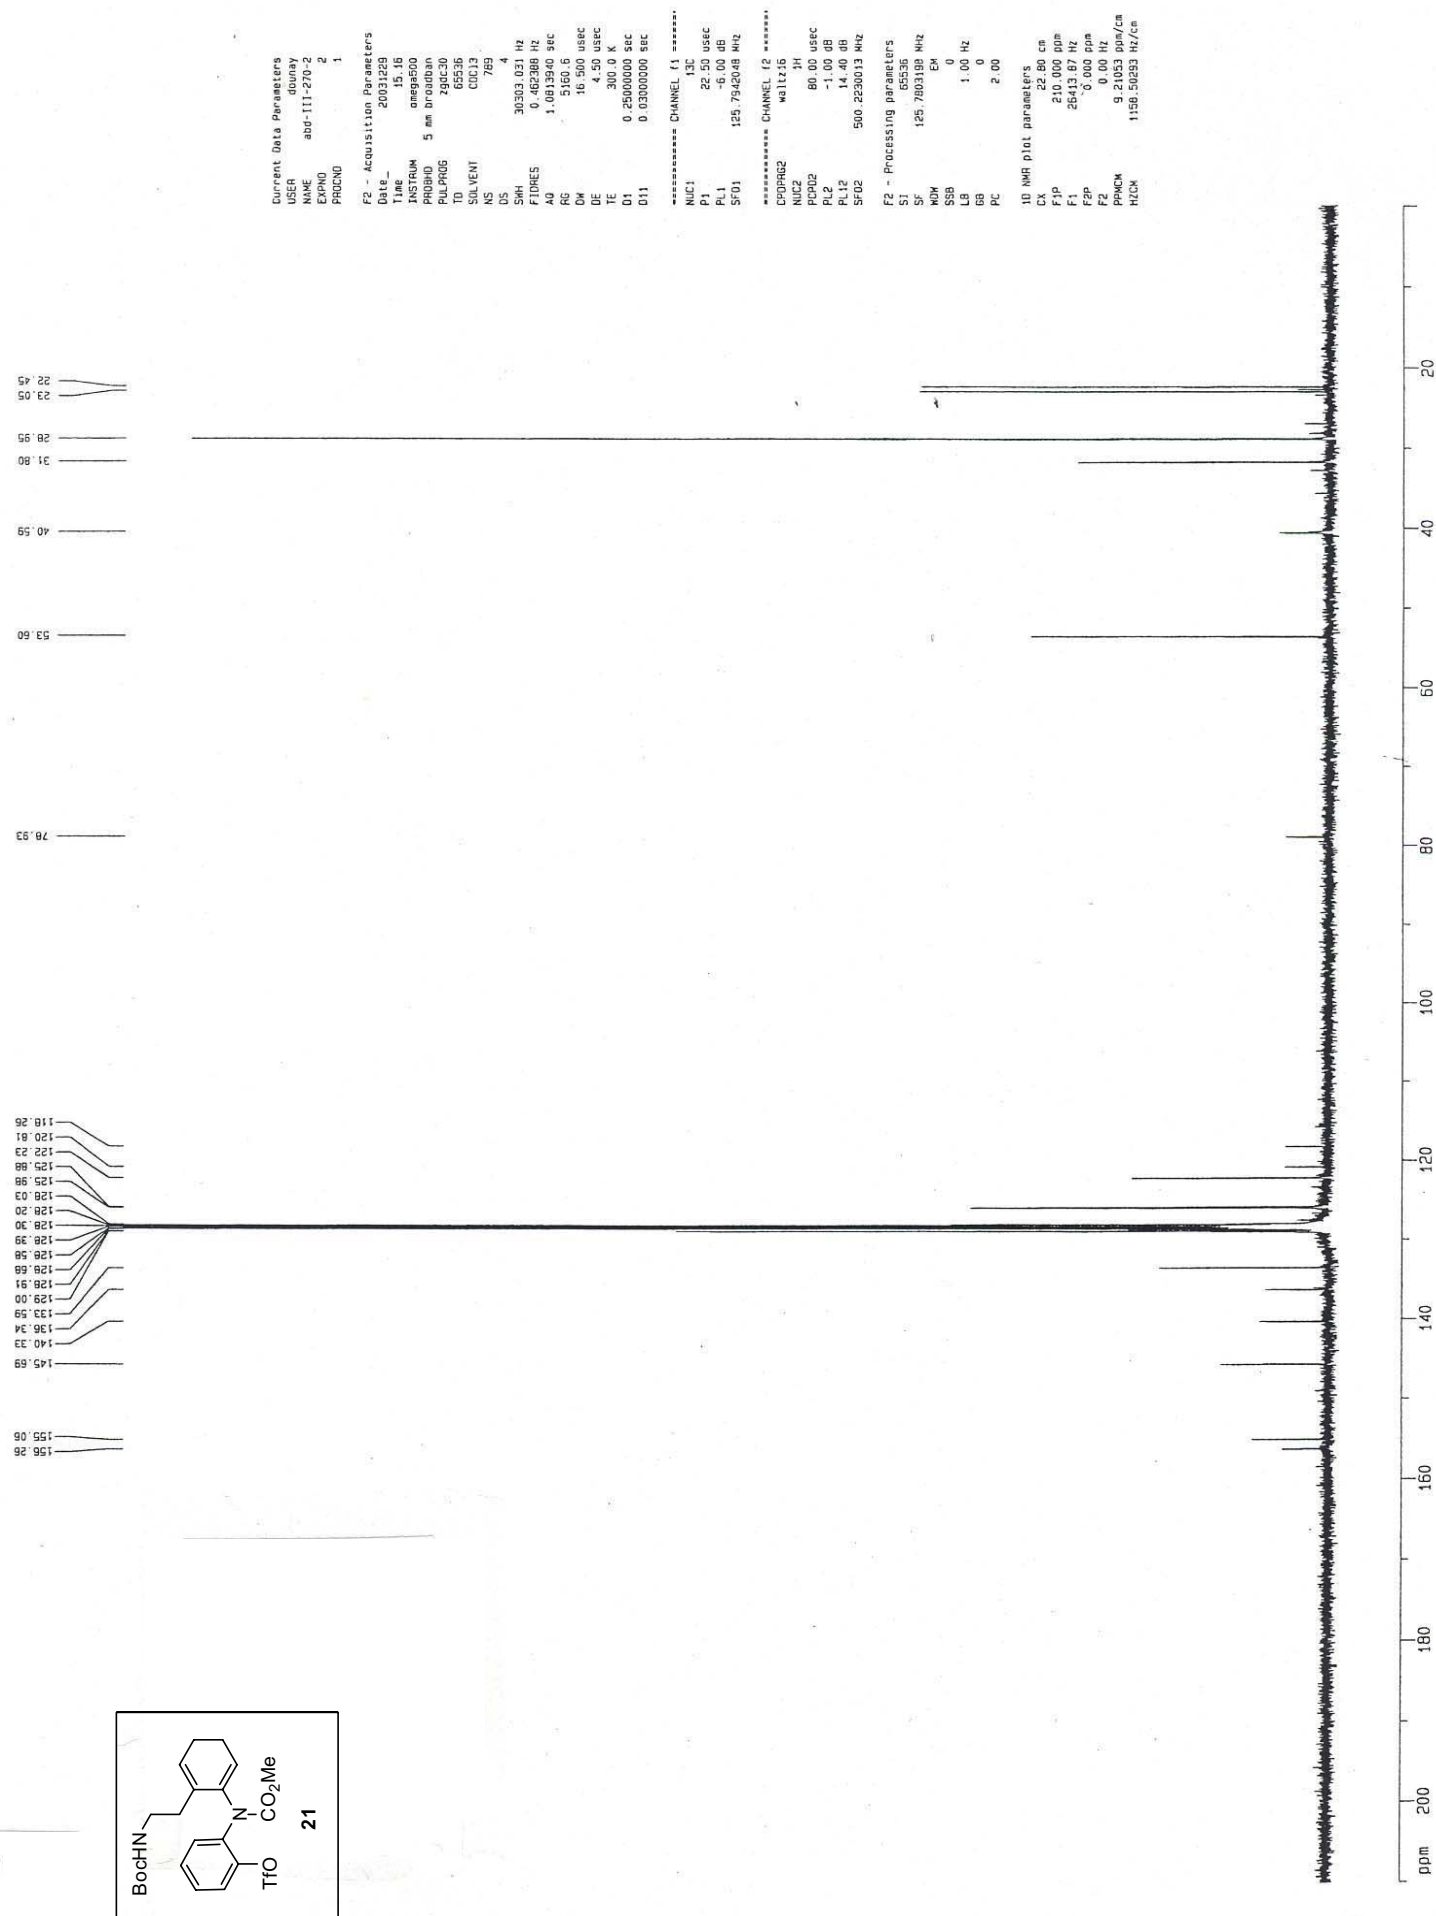



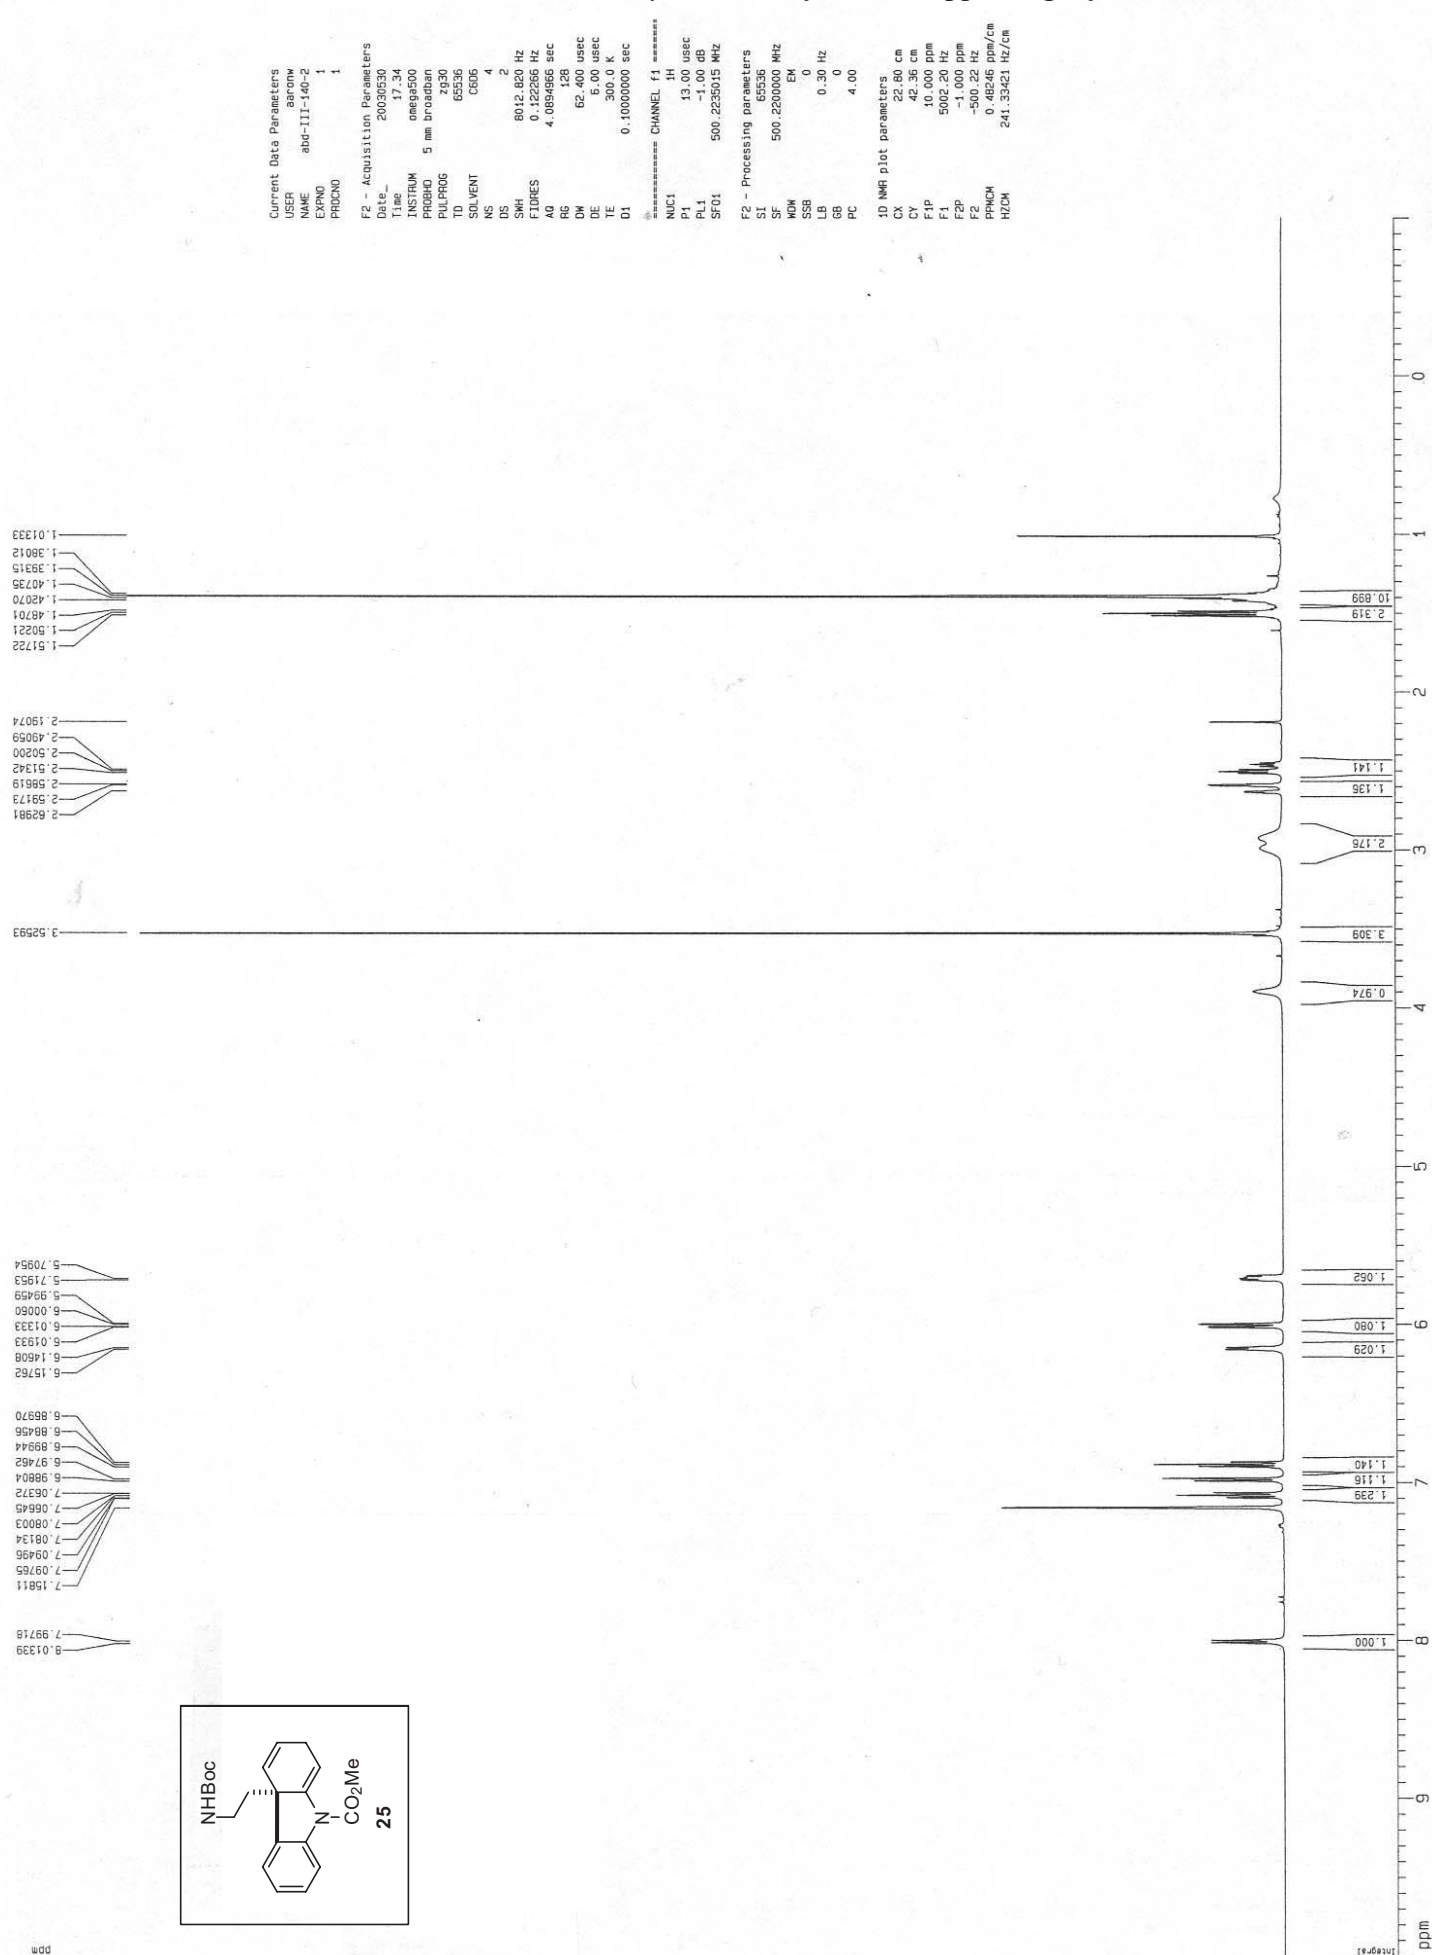

13C spectrum with 1H decoupling

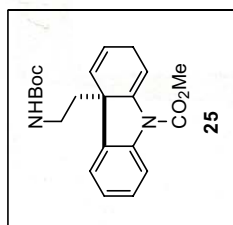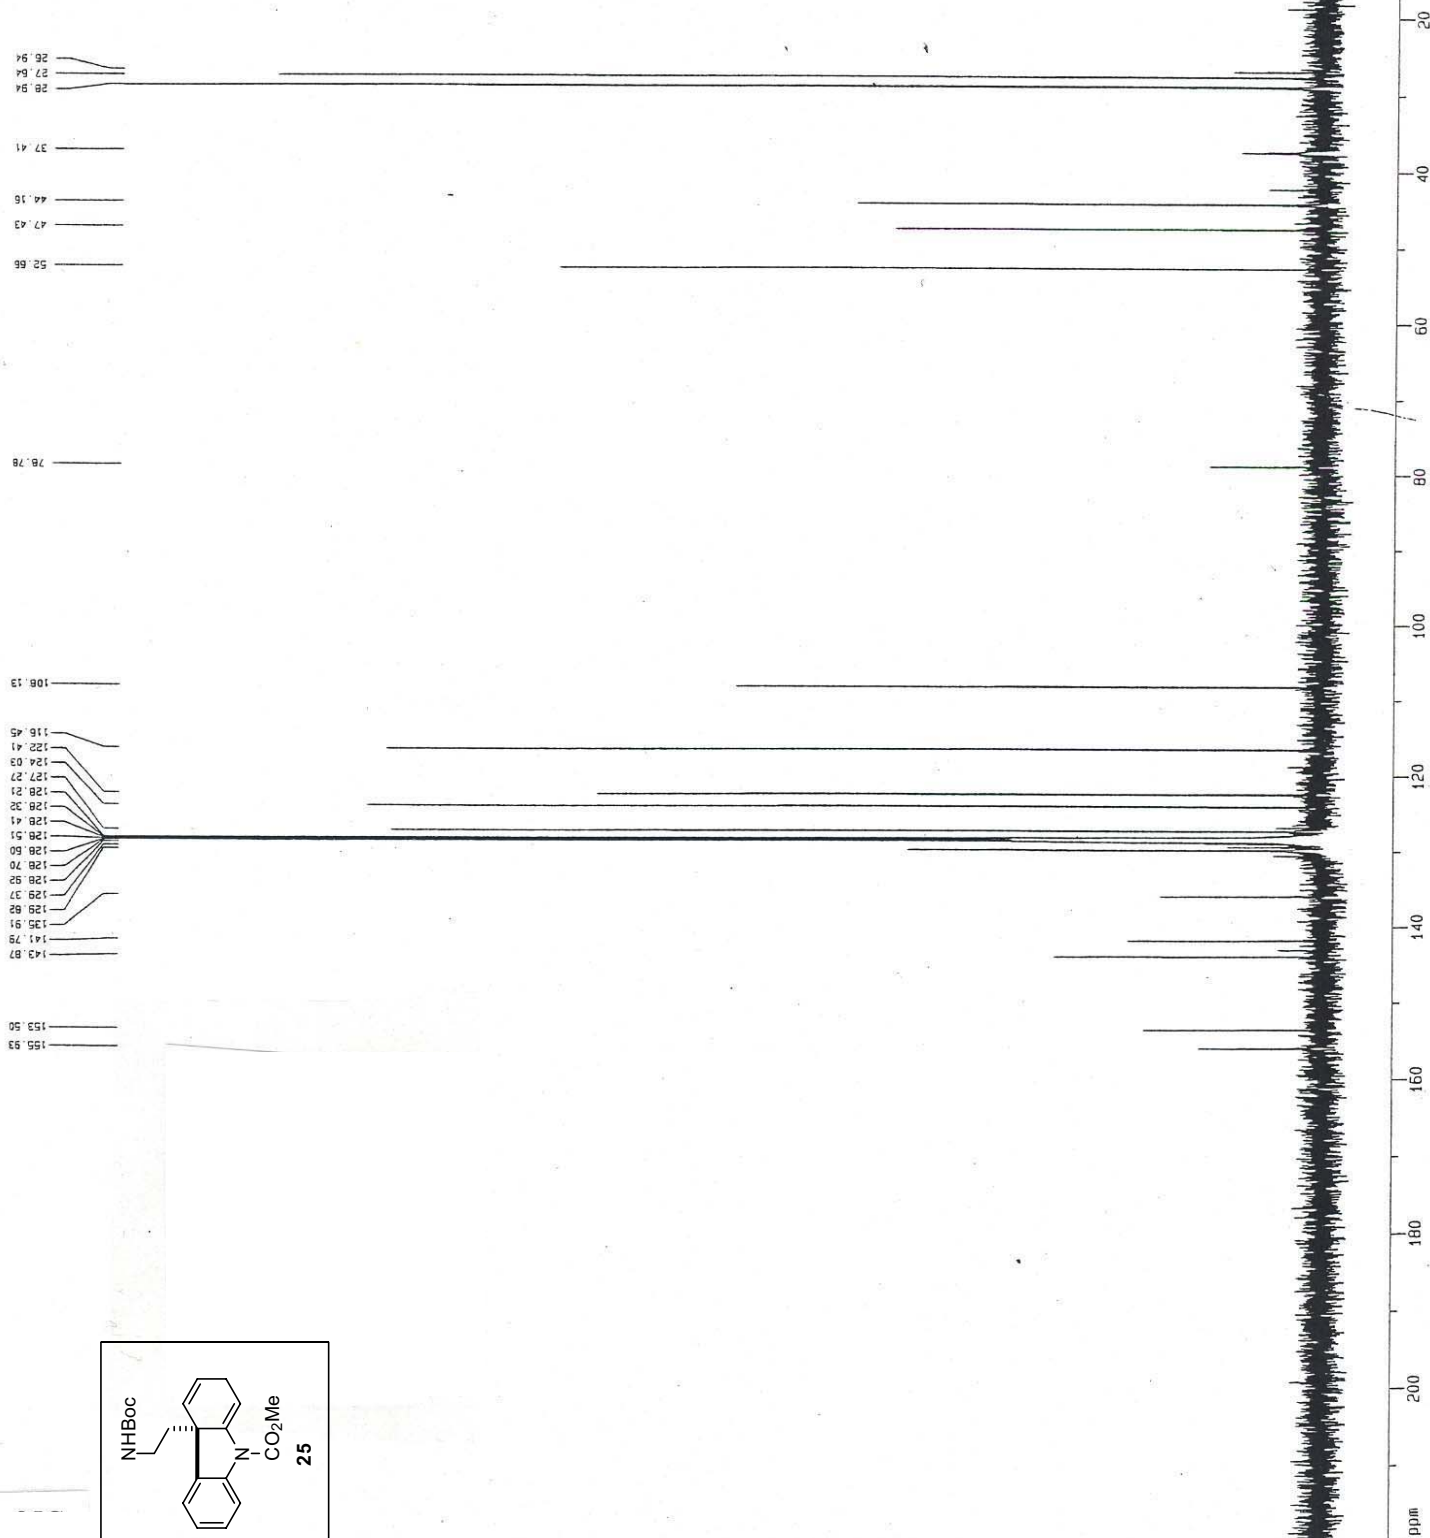

Current Data Parameters  
 USER dounay  
 NAME 803-111-140-2  
 EXPNO 3  
 PROCNO 1

F2 - Acquisition Parameters  
 Date\_ 20030505  
 Time 17 05  
 INSTRUM 0000500  
 PROBNM 5 mm DRAGON  
 PULPROG zgpg30  
 TO 65536  
 SOLVENT CDCl3  
 NS 688  
 DS 4  
 SWH 30303.031 Hz  
 FIDRES 0.462388 Hz  
 AQ 1.0813940 sec  
 RG 5160.6  
 DM 16.500 usec  
 DE 4.50 usec  
 TE 300.0 K  
 D1 0.25000000 sec  
 D11 0.03000000 sec

\*\*\*\*\* CHANNEL f1 \*\*\*\*\*  
 NUC1 13C  
 P1 22.50 usec  
 PL1 -6.00 dB  
 SF01 125.7942046 MHz

\*\*\*\*\* CHANNEL f2 \*\*\*\*\*  
 CPDPRG2 waltz16  
 NUC2 1H  
 P2 80.00 usec  
 PL2 -1.00 dB  
 PL12 14.40 dB  
 SF02 500.230013 MHz

F2 - Processing parameters  
 S1 65536  
 SF 125.7803180 MHz  
 MDH EM  
 SSB 0  
 LB 1.00 Hz  
 GB 0  
 PC 2.00

10 NMR pilot parameters  
 CX 22.80 cm  
 FIP 220.000 ppa  
 F1 27577.57 Hz  
 F2P 0.000 ppa  
 F2 0.00 Hz  
 PPMCN 9.64912 ppa/cm  
 NCCN 1213.60580 Hz/cm



<sup>1</sup>H spectrum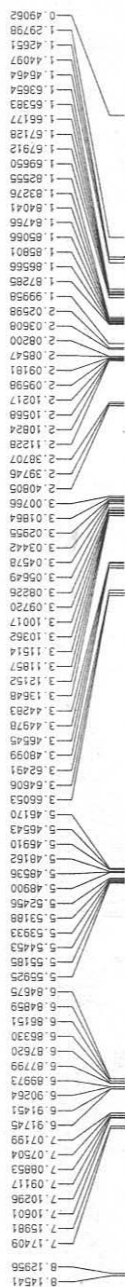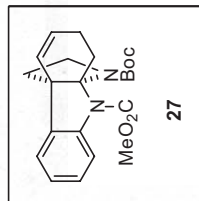

Current Data Parameters  
 USER aarcw  
 NAME abd-III-157-X  
 EXPNO 1  
 PROCNO 1

F2 - Acquisition Parameters  
 Date\_ 20060313  
 Time 11:13  
 INSTRUM spect  
 PROBRW 5 mm broadband  
 PULPROG zgpg30  
 TD 65536  
 SOLVENT CDCl<sub>3</sub>  
 NS 8  
 DS 2  
 SWH 8012.620 Hz  
 FIDRES 0.122266 Hz  
 AQ 4.0894566 sec  
 RG 287.4  
 DM 62.400 usec  
 DE 6.00 usec  
 TE 333.0 K  
 D1 0.1000000 sec

\*\*\*\*\* CHANNEL f1 \*\*\*\*\*  
 NUC1 <sup>1</sup>H  
 P1 12.00 usec  
 PL1 -3.50 dB  
 SF01 499.834985 MHz

F2 - Processing parameters  
 SI 65535  
 SF 499.829942 MHz  
 WDW EM  
 SSF 0  
 SSB 0  
 LB 0.30 Hz  
 GB 0  
 PC 4.00

1D NMR plot parameters  
 CX 22.80 cm  
 CY 49.85 cm  
 FIP 10.000 ppm  
 F1 4999.30 Hz  
 F2P -1.000 ppm  
 F2 -499.83 Hz  
 PPMCH 0.48246 ppm/cm  
 HZCM 241.14606 Hz/cm

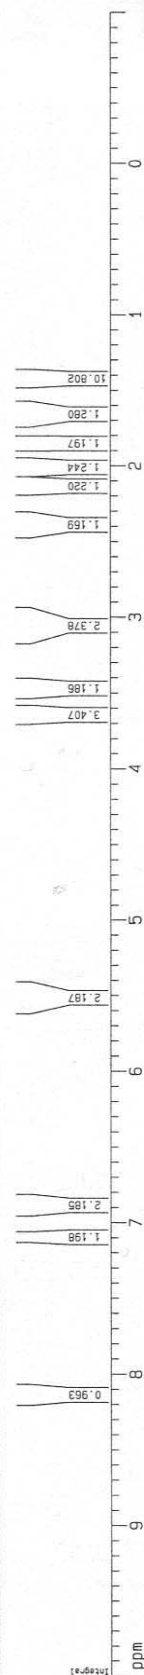

<sup>13</sup>C spectrum with <sup>1</sup>H decoupling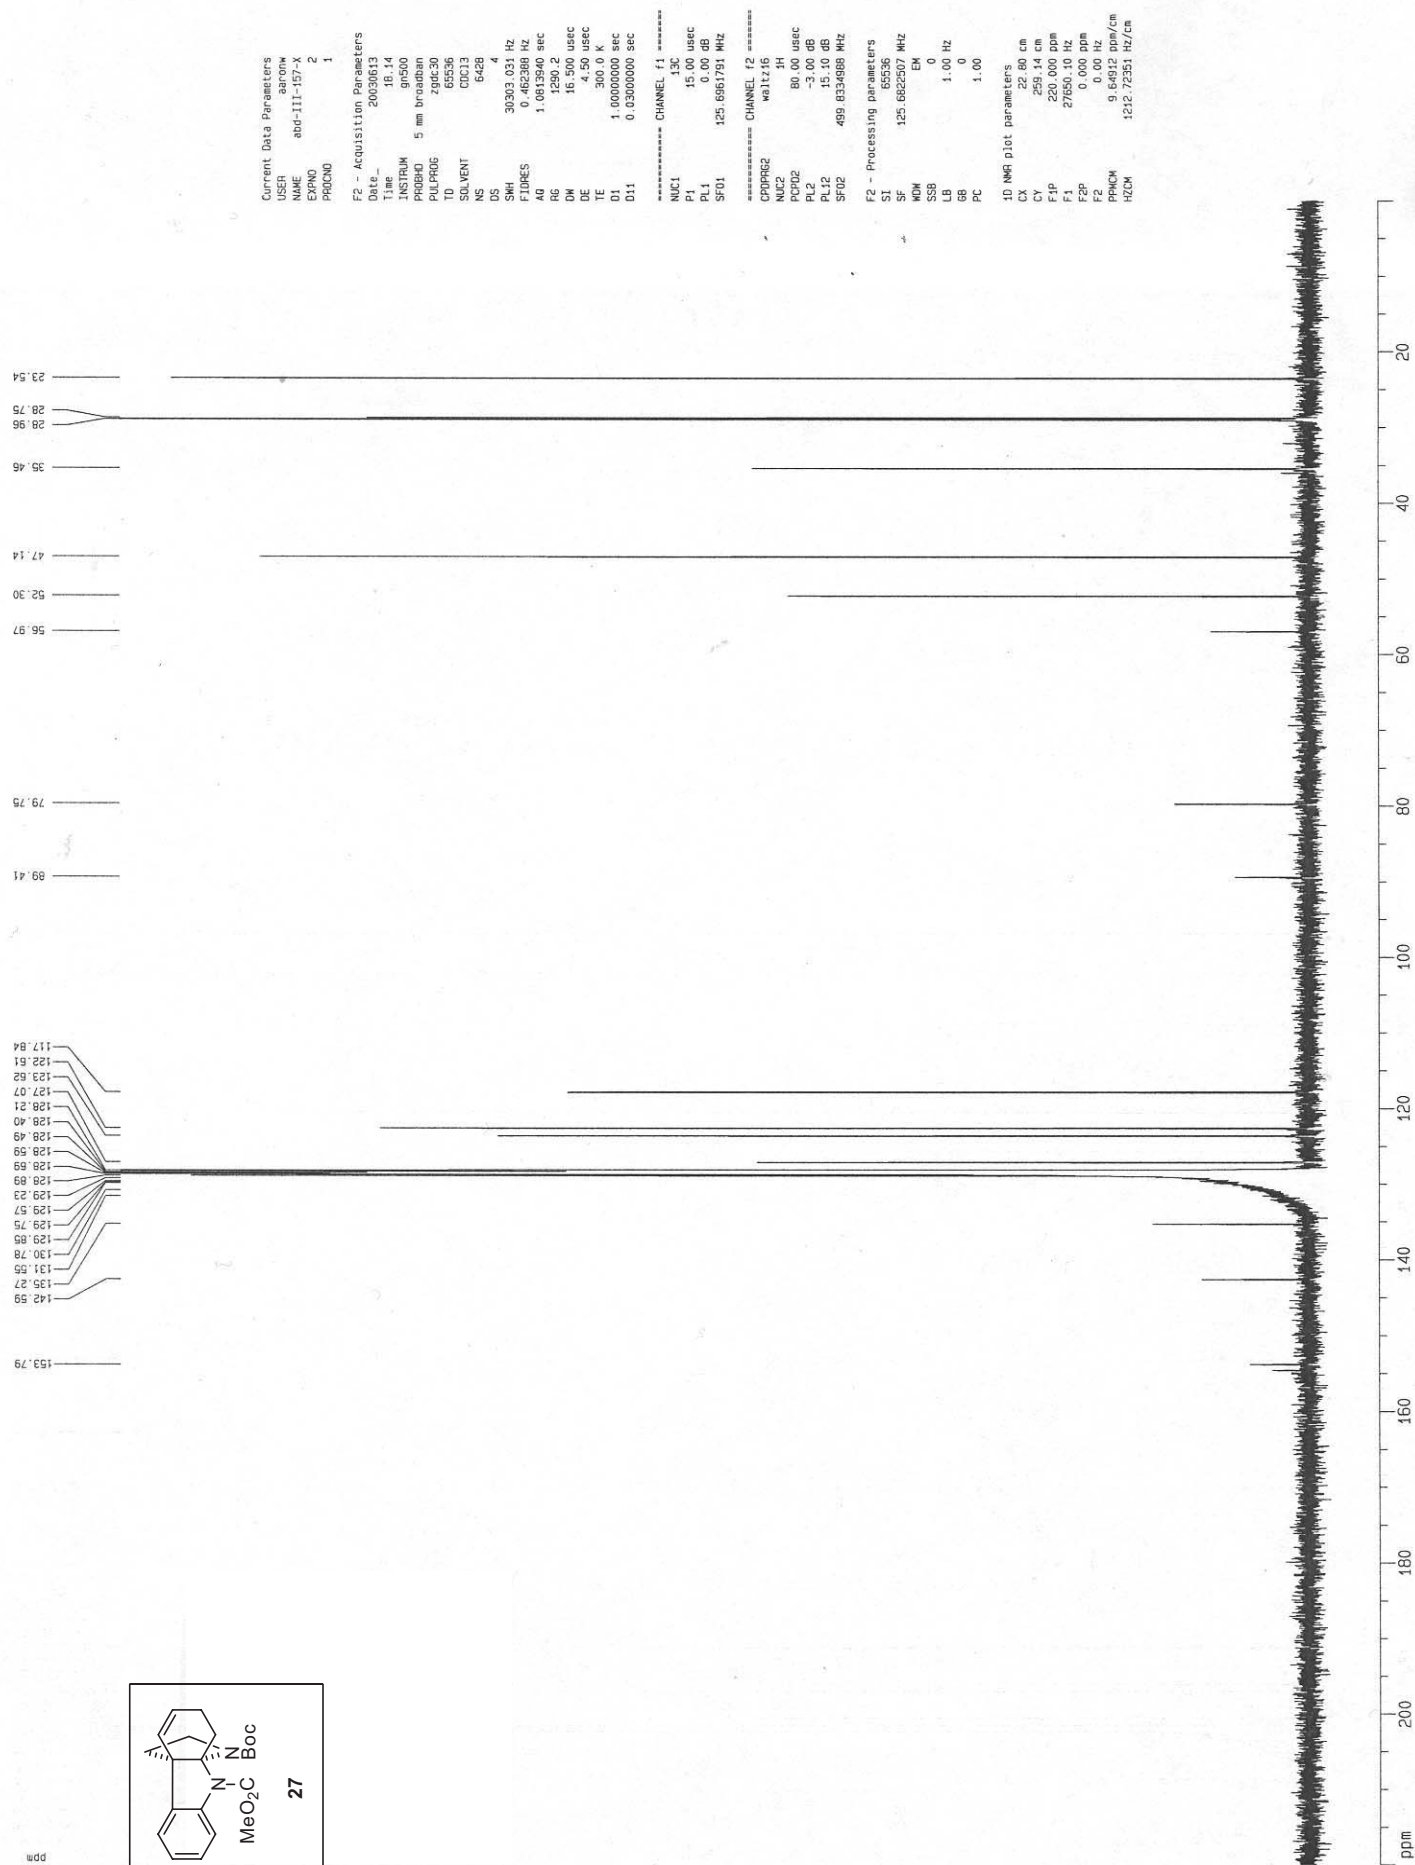

Data File C:\HPCHEM\1\DATA\ABD1\10020301.D

Sample Name: abd-iii-157

rac-aminal

Injection Date : 10/2/03 6:47:16 PM

Seq. Line : 1

Sample Name : abd-iii-157

Location : Vial 1

Acq. Operator : abd

Inj : 1

Inj Volume : 5 µl

Sequence

Method

Last ch

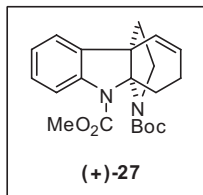

1\SEQUENCE\DEF\_LC.S

\ABD1.M

07:35 PM by abd

(after loading)

(ABD1\10020301.D)

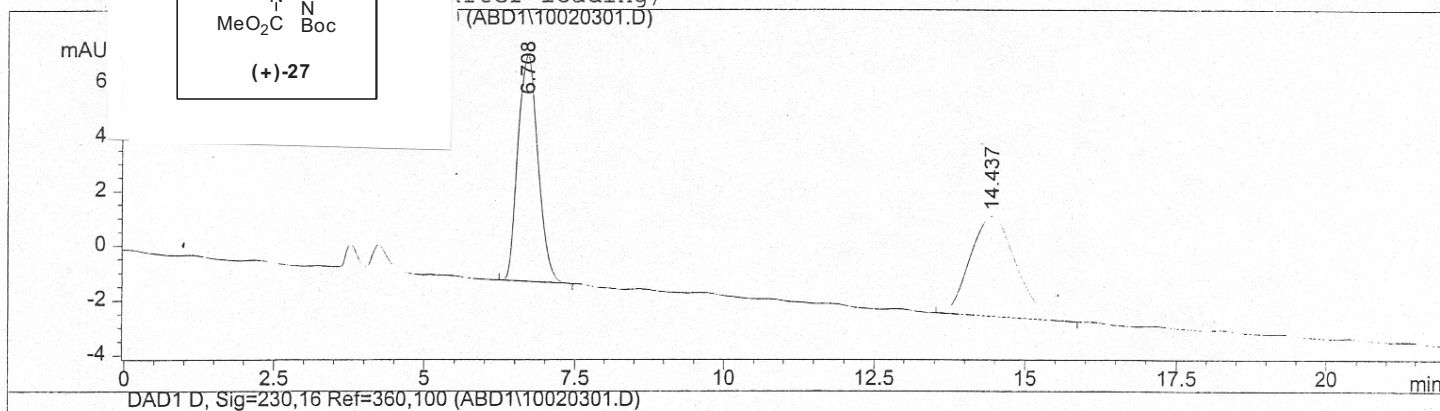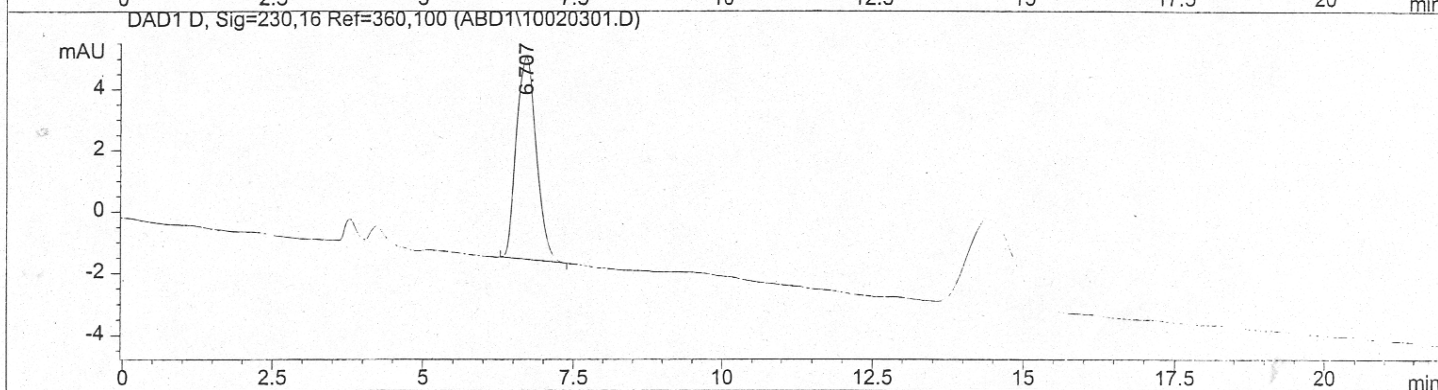

## Area Percent Report

Sorted By : Signal  
Multiplier : 1.0000  
Dilution : 1.0000  
Use Multiplier & Dilution Factor with ISTDs

Signal 1: DAD1 B, Sig=254,100 Ref=360,100

| Peak # | RetTime [min] | Type | Width [min] | Area [mAU*s] | Height [mAU] | Area %  |
|--------|---------------|------|-------------|--------------|--------------|---------|
| 1      | 6.708         | BB   | 0.3724      | 193.30757    | 8.28051      | 50.1980 |
| 2      | 14.437        | PP   | 0.7832      | 191.78249    | 3.66048      | 49.8020 |

Totals : 385.09006 11.94099

Results obtained with enhanced integrator!

Signal 2: DAD1 D, Sig=230,16 Ref=360,100



abd-III-270  
 t-bu Pfaltz ligand  
 98:2 Hex/IPA, OD-H Column, 1.0 ml/min

Injection Date : 10/2/03 7:10:29 PM  
 Sample Name : abd-III-270  
 Acq. Operator : abd

Seq. Line : 2  
 Location : Vial 2  
 Inj : 1  
 Inj Volume : 5 µl

Acq. Method : D:\METHODS\ABD1.M  
 Last changed : 10/2/03 7:09:28 PM by abd  
 (modified after loading)  
 Analysis Method : C:\HPCHEM\1\METHODS\SK1.M  
 Last changed : 2/26/04 4:35:08 PM by AMY  
 (modified after loading)

15% IPA in Hexanes, OJ column

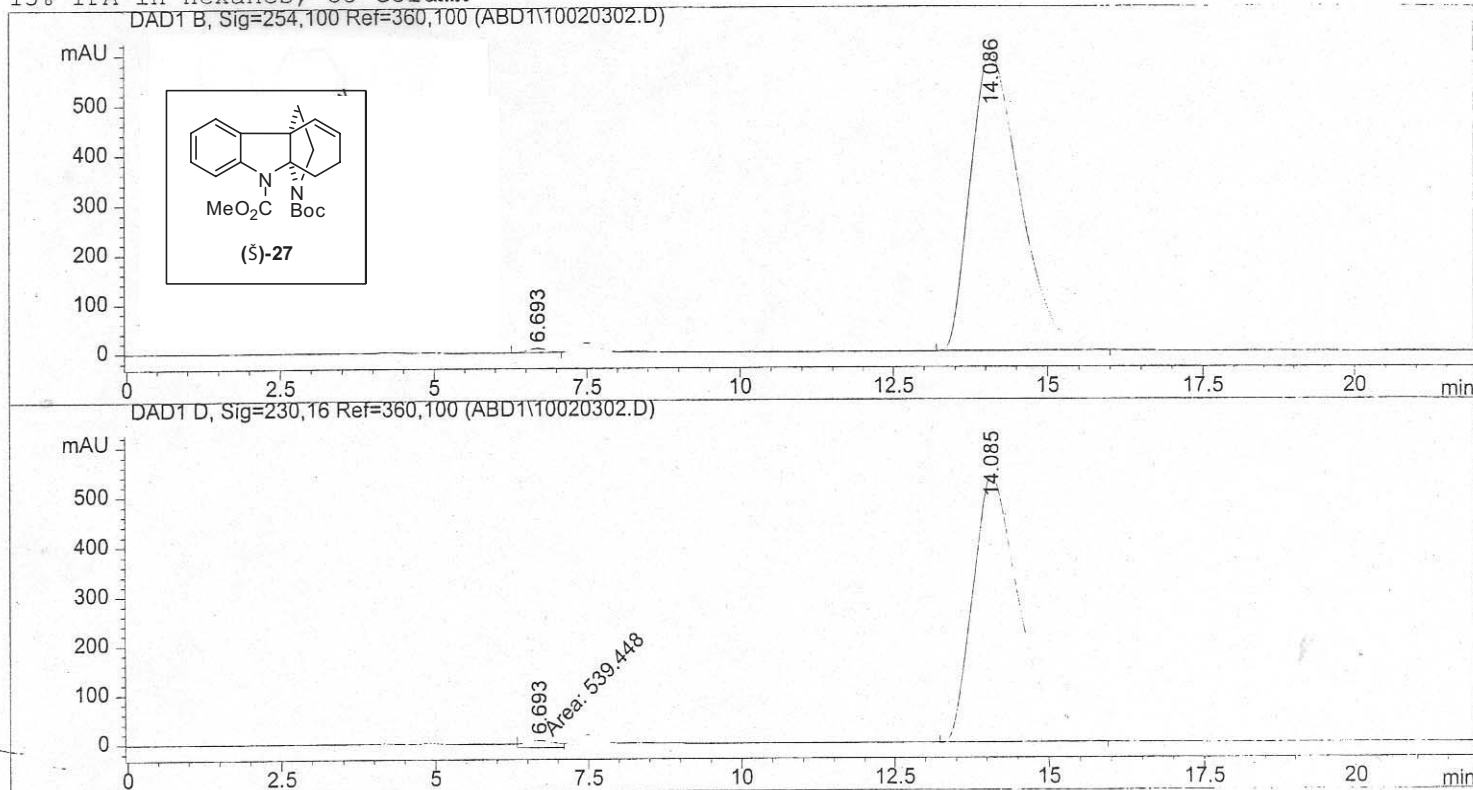

# Area Percent Report

Sorted By : Signal  
 Multiplier : 1.0000  
 Dilution : 1.0000  
 Use Multiplier & Dilution Factor with ISTDs

Signal 1: DAD1 B, Sig=254,100 Ref=360,100

| Peak # | RetTime [min] | Type | Width [min] | Area [mAU*s] | Height [mAU] | Area %  |
|--------|---------------|------|-------------|--------------|--------------|---------|
| 1      | 6.693         | PV   | 0.3618      | 180.33255    | 8.09739      | 0.5394  |
| 2      | 14.086        | BB   | 0.8746      | 3.32488e4    | 598.03790    | 99.4606 |

Totals : 3.34291e4 606.13529

Results obtained with enhanced integrator!

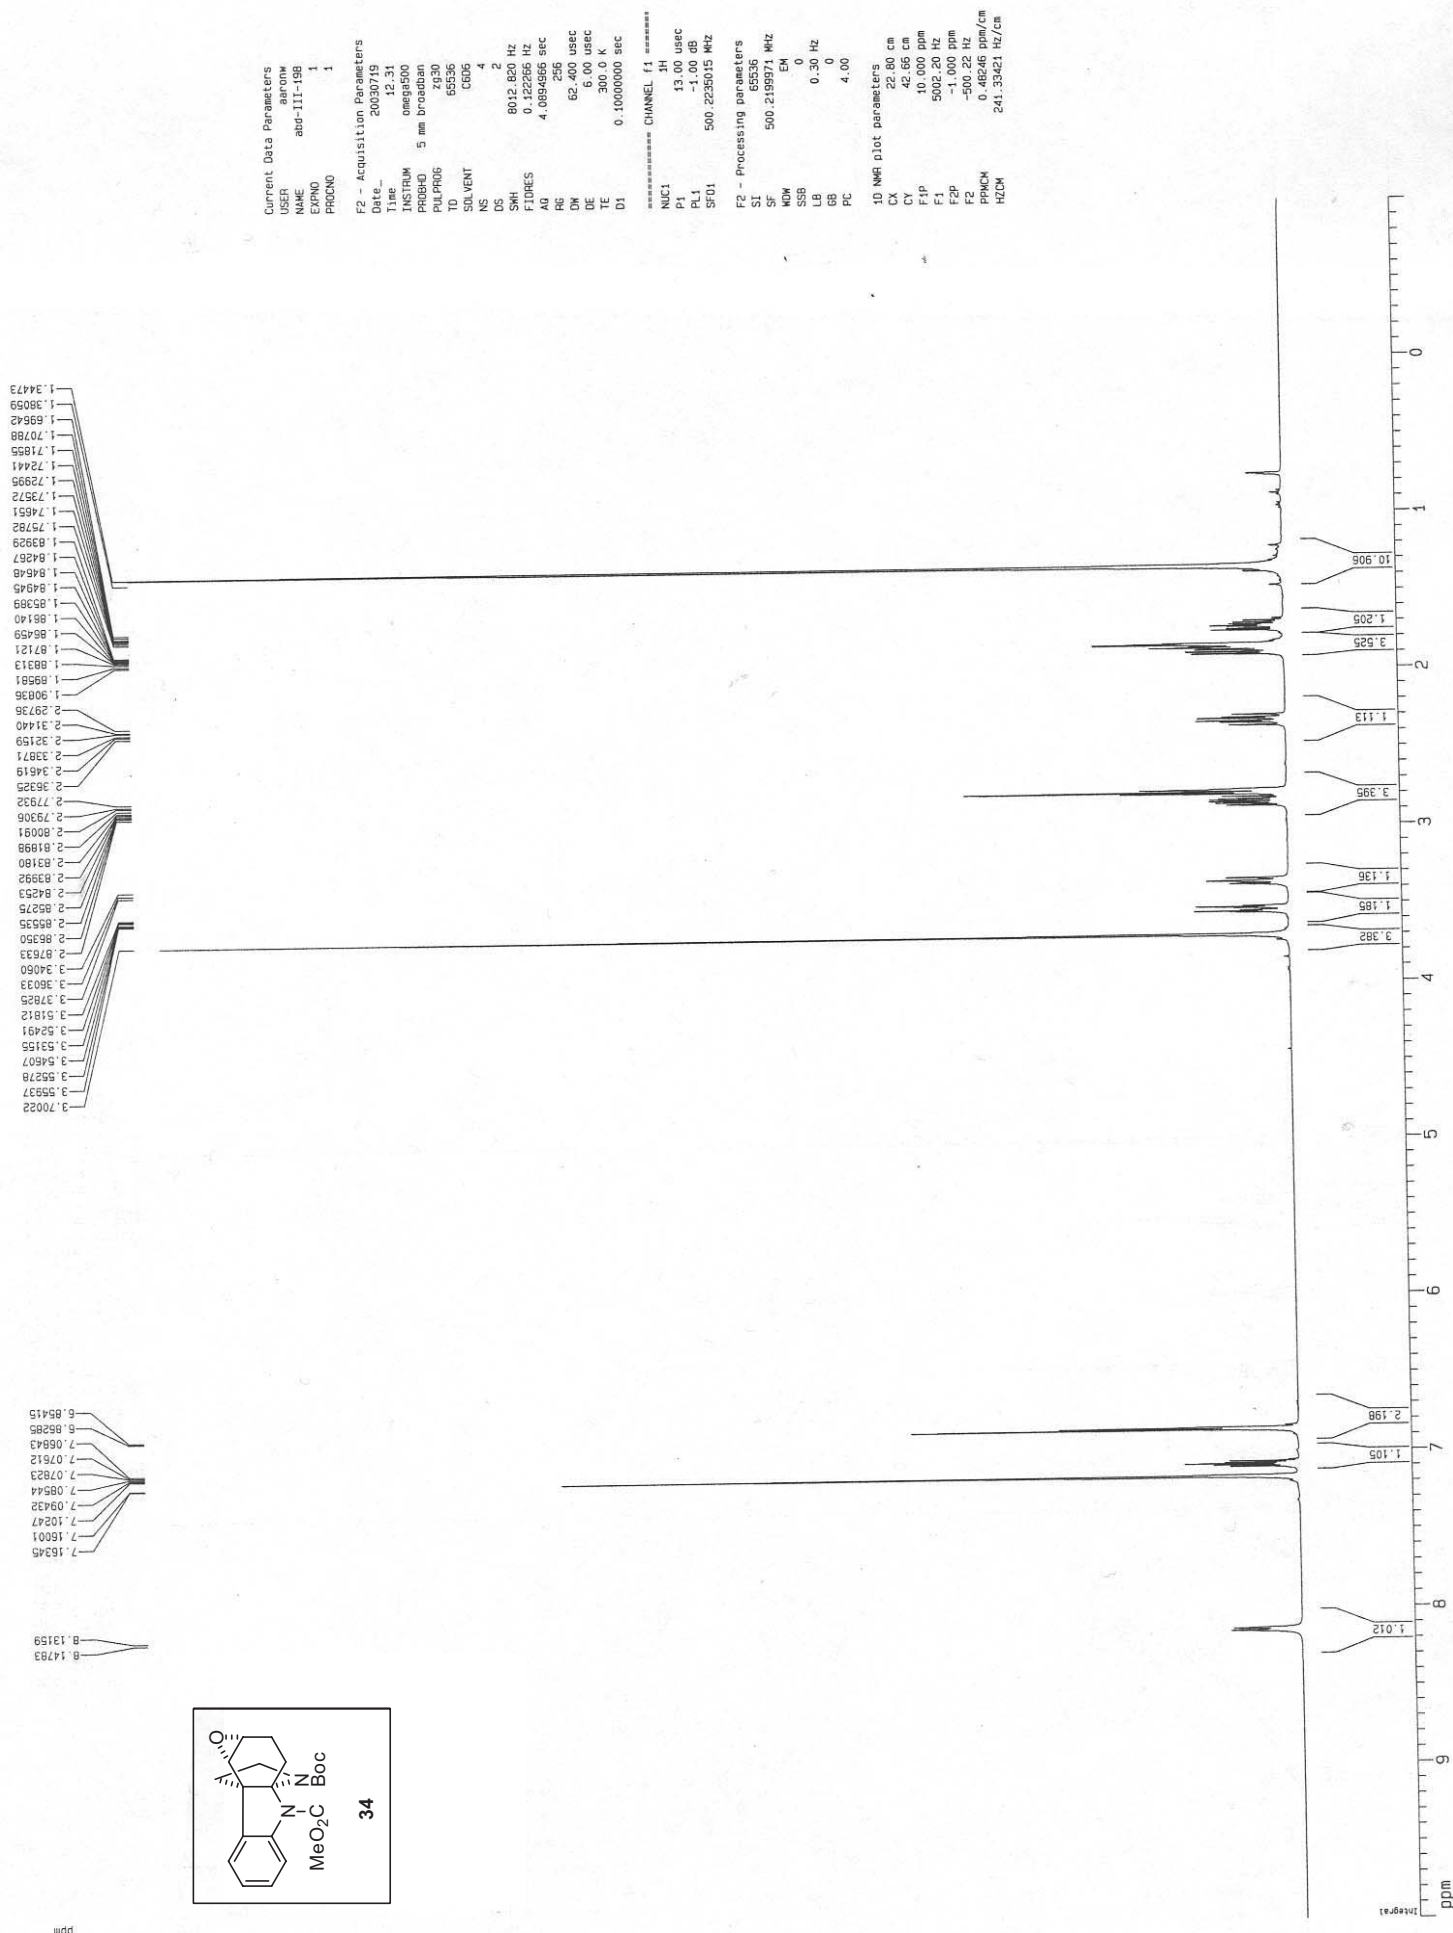

<sup>13</sup>C spectrum with <sup>1</sup>H decoupling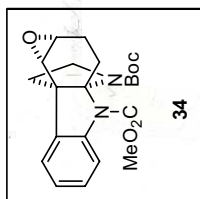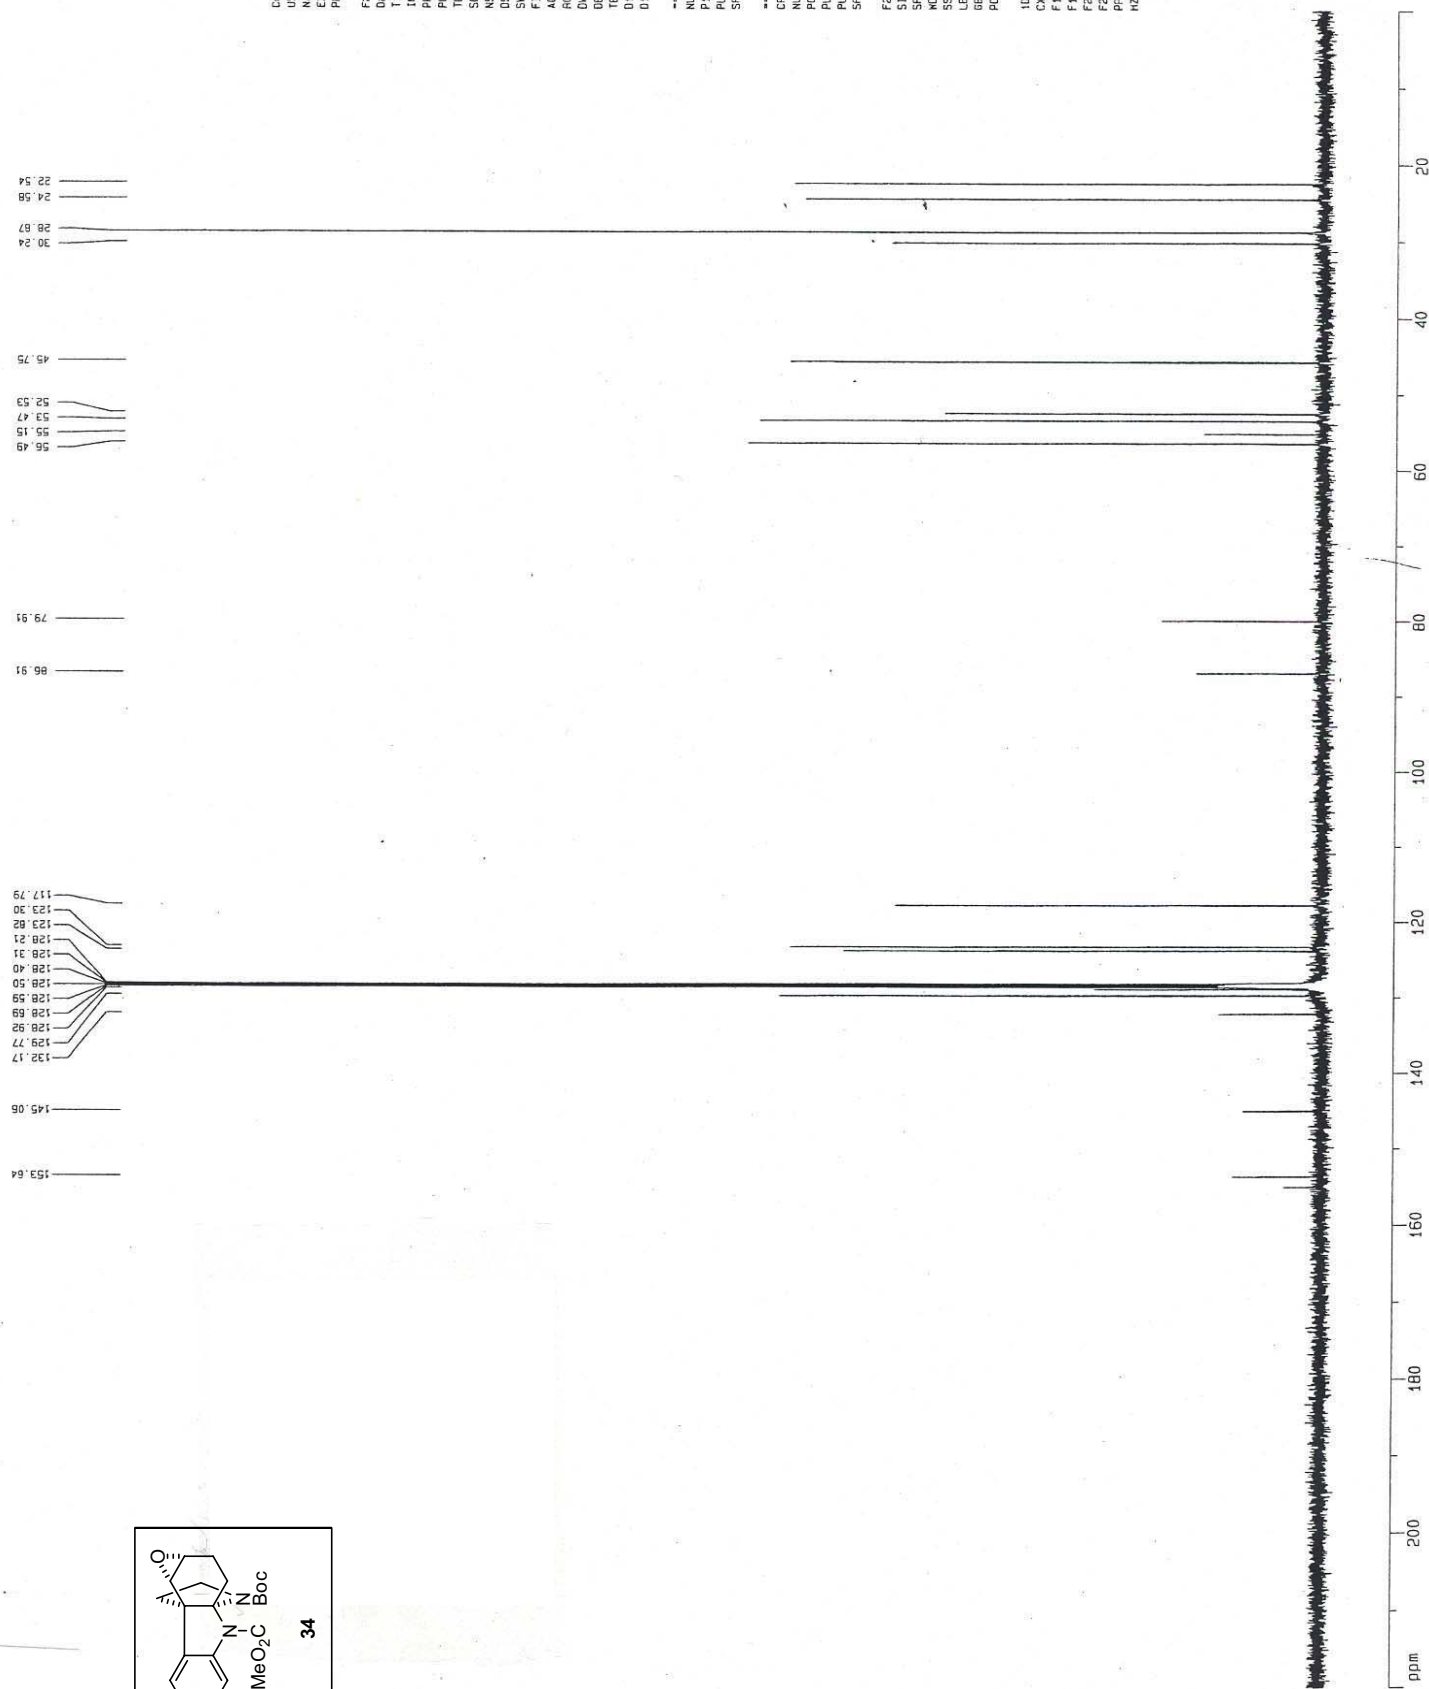

Current Data Parameters  
 USER dounay  
 NAME abd-111-198  
 EXPNO 2  
 PROCNO 1

F2 - Acquisition Parameters  
 Date\_ 20030719  
 Time 12:35  
 INSTRUM oneg500  
 PROBRD 5 mm oneg500  
 PULPROG zgpg30  
 TD 65536  
 SOLVENT CDCl3  
 NS 402  
 DS 4  
 SMH 30303.031 Hz  
 FIDRES 0.462388 Hz  
 AQ 1.0613940 sec  
 RG 5160.6  
 DW 16.500 usec  
 DE 4.50 usec  
 TE 333.0 K  
 D1 0.25000000 sec  
 D11 0.03000000 sec

\*\*\*\*\* CHANNEL f1 \*\*\*\*\*  
 NUC1 13C  
 P1 22.50 usec  
 PL1 -6.00 dB  
 SF01 125.7942048 MHz

\*\*\*\*\* CHANNEL f2 \*\*\*\*\*  
 CPDPRG2 waltz16  
 NUC2 1H  
 P2 80.00 usec  
 PL2 -1.00 dB  
 PL12 14.40 dB  
 SF02 500.223013 MHz

F2 - Processing parameters  
 SI 65536  
 SF 125.7603194 MHz  
 EN EN  
 MD4 0  
 LB 1.00 Hz  
 GB 0  
 PC 2.00

1D NMR plot parameters  
 CX 22.00 cm  
 F1P 220.000 ppm  
 F1 27671.67 Hz  
 F2P 0.000 ppm  
 F2 0.00 Hz  
 PPMCH 9.64912 ppm/cm  
 NUCN 1213.66960 Hz/cm

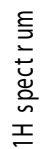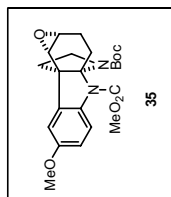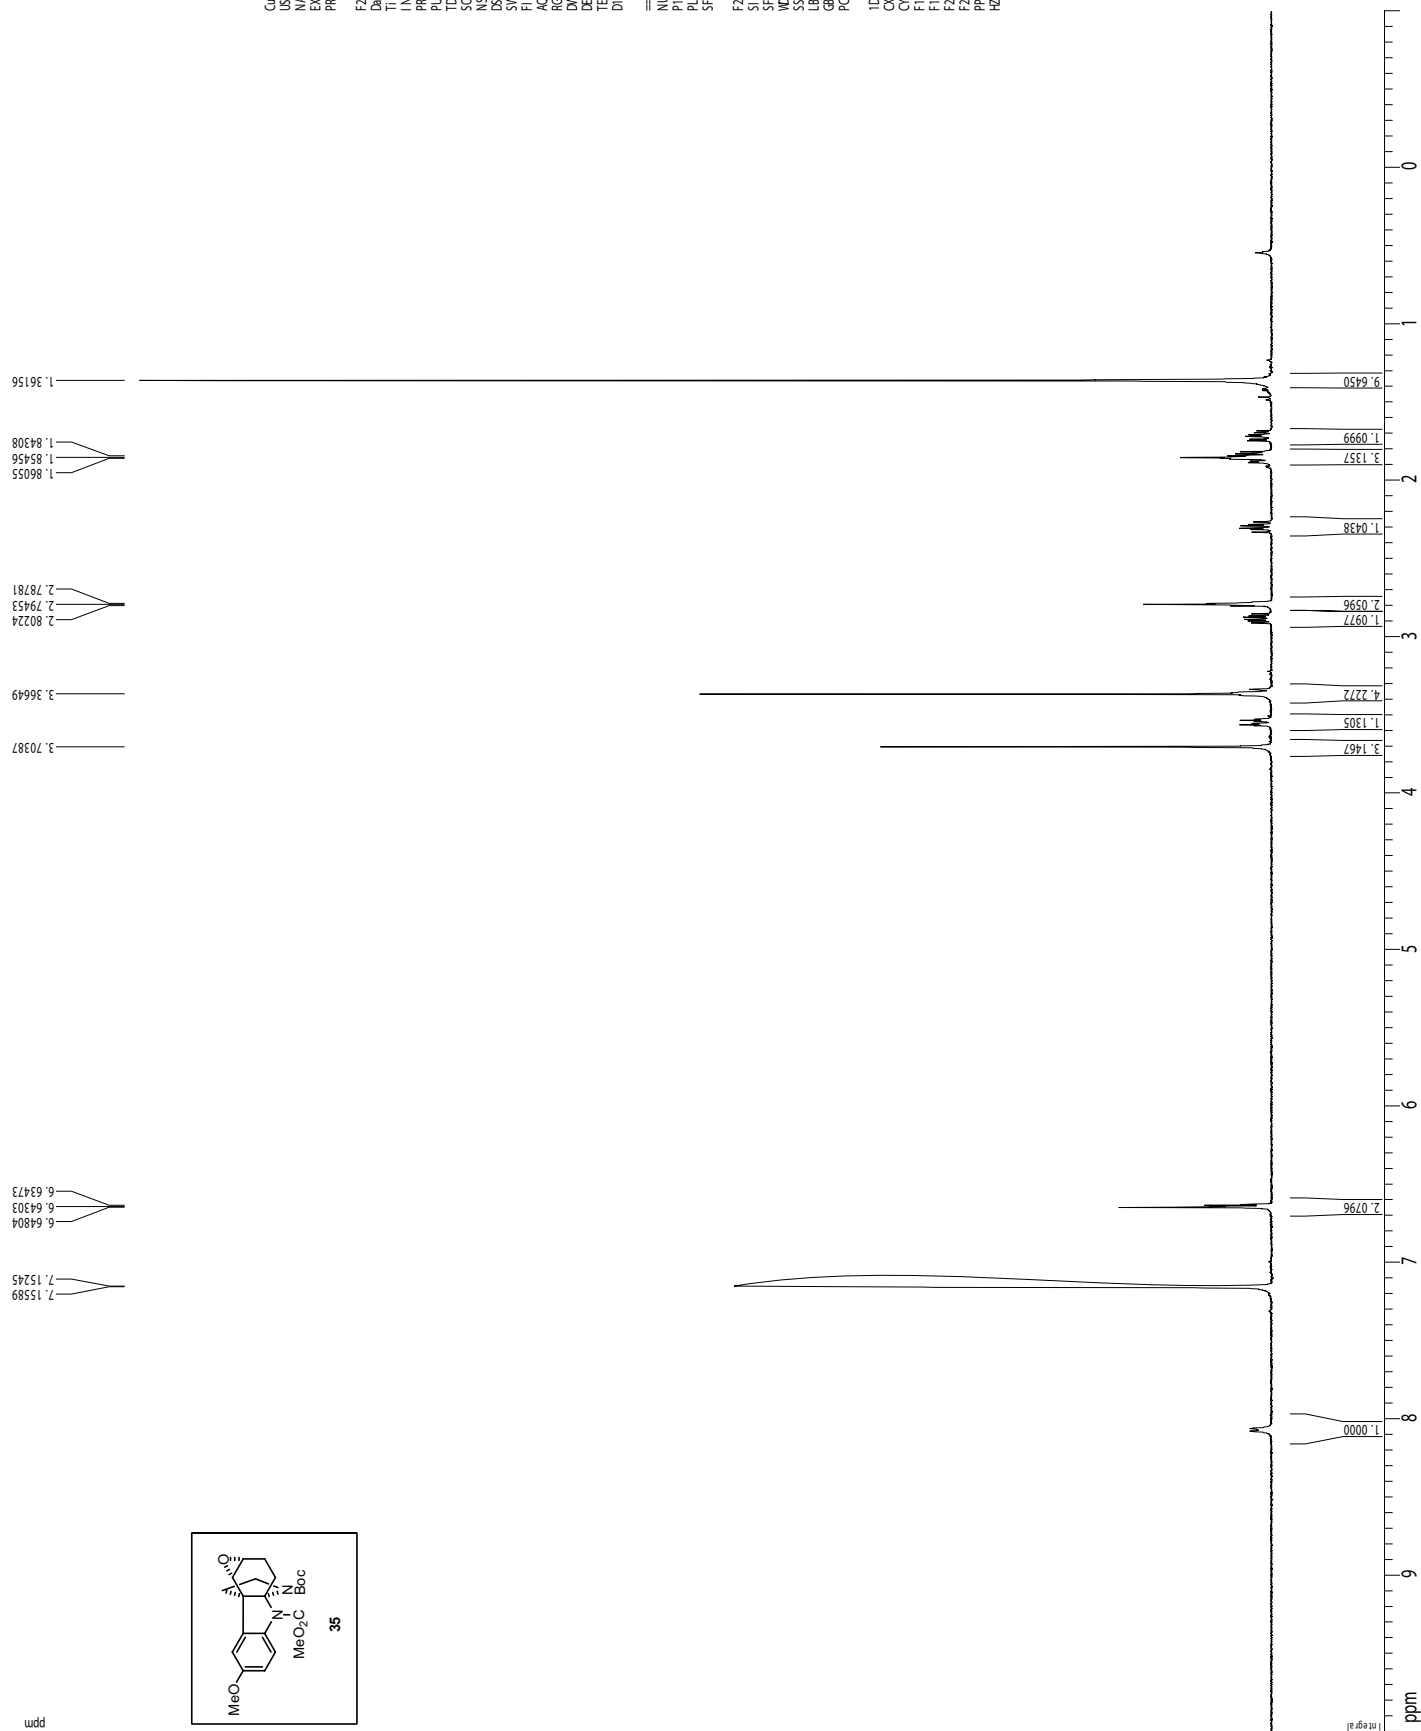





<sup>1</sup>H spectrum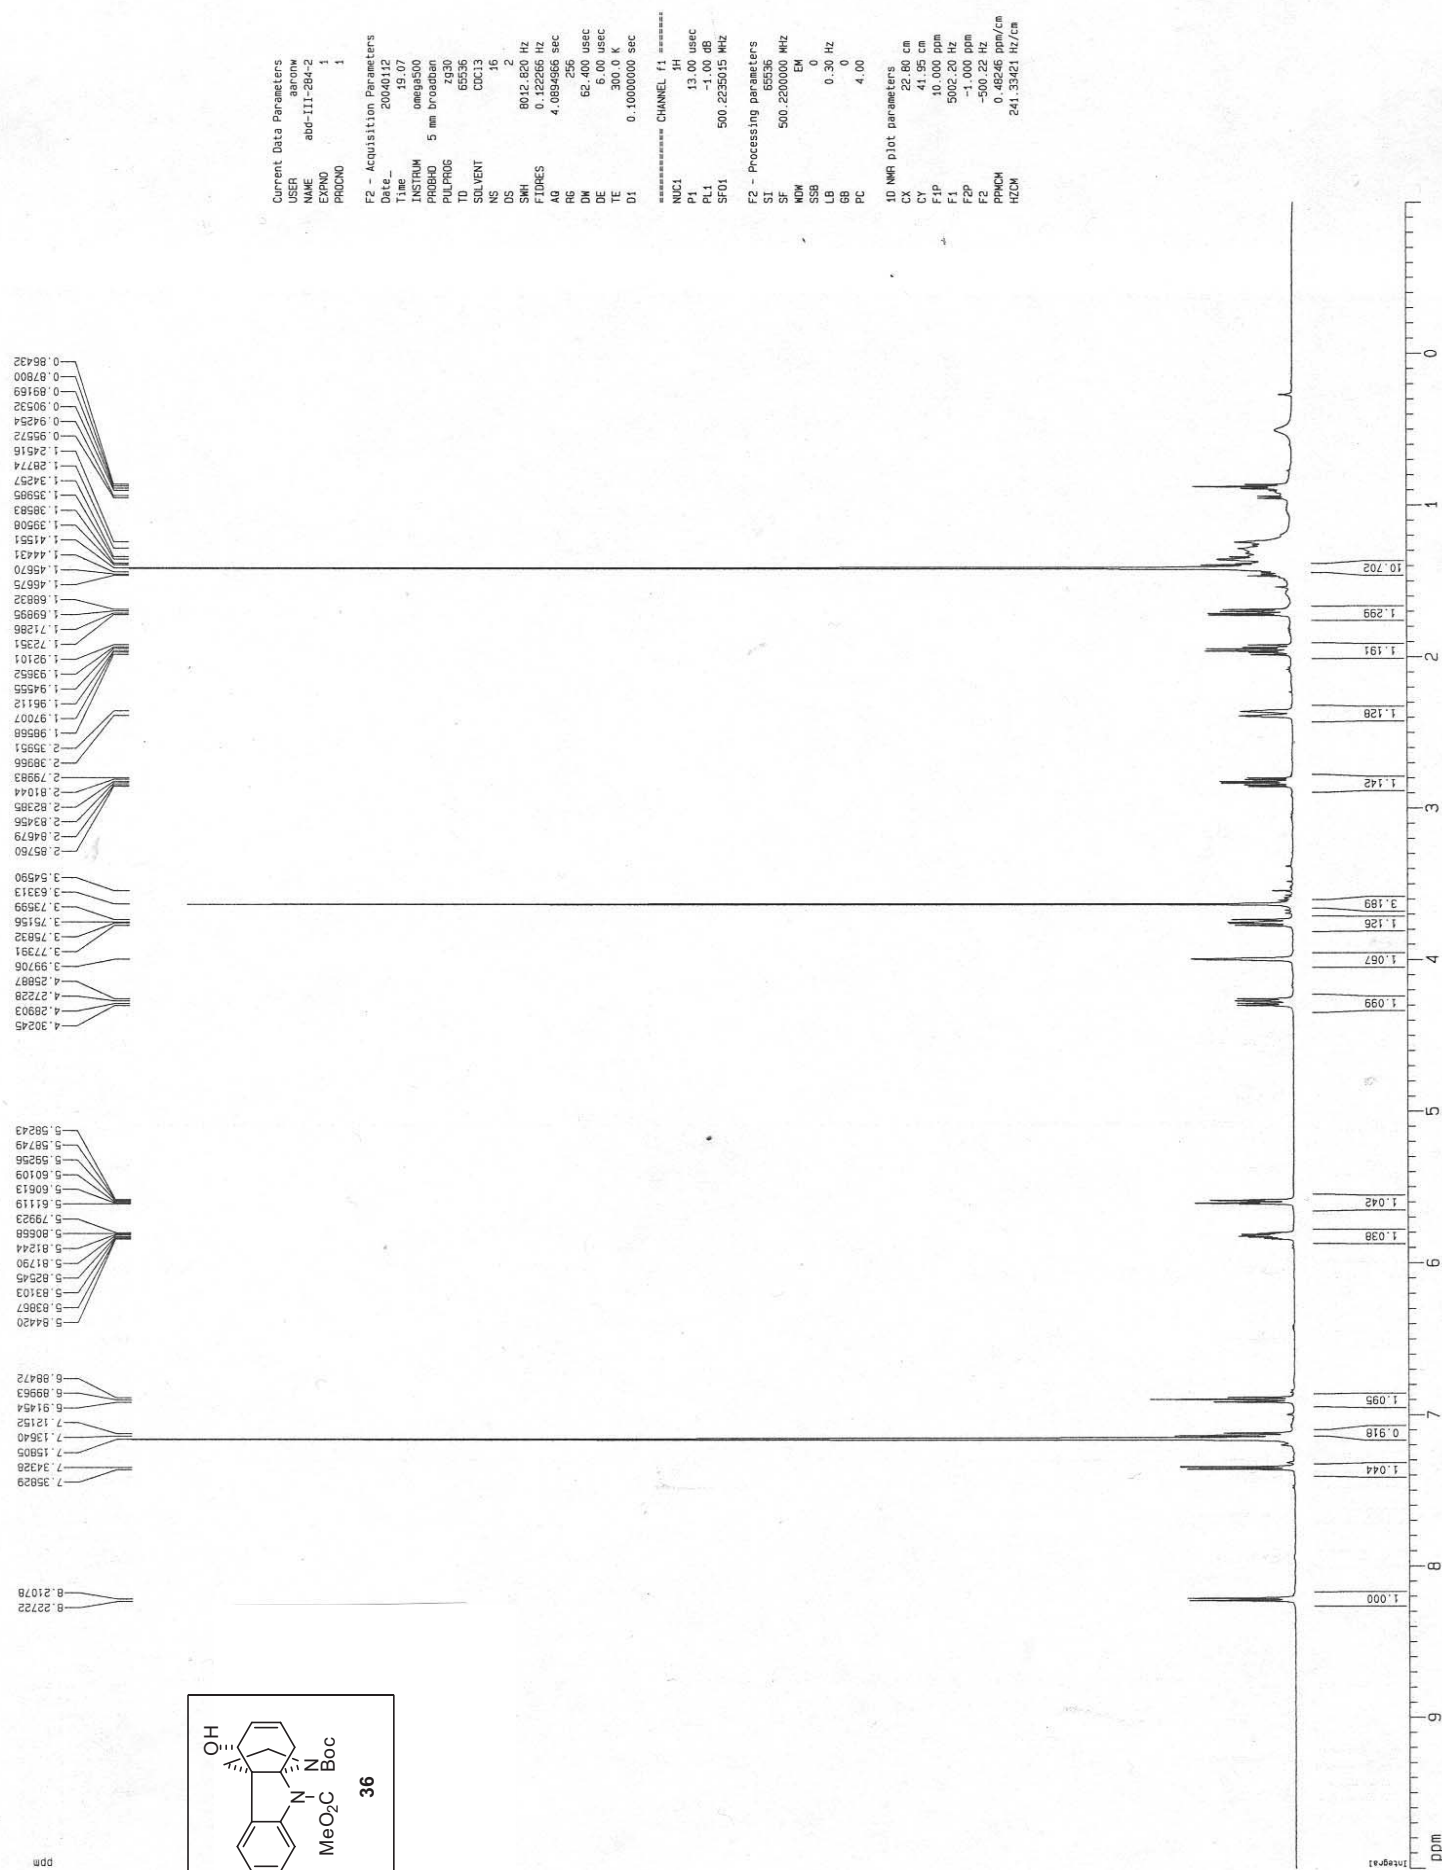

## 13C spectrum with 1H decoupling

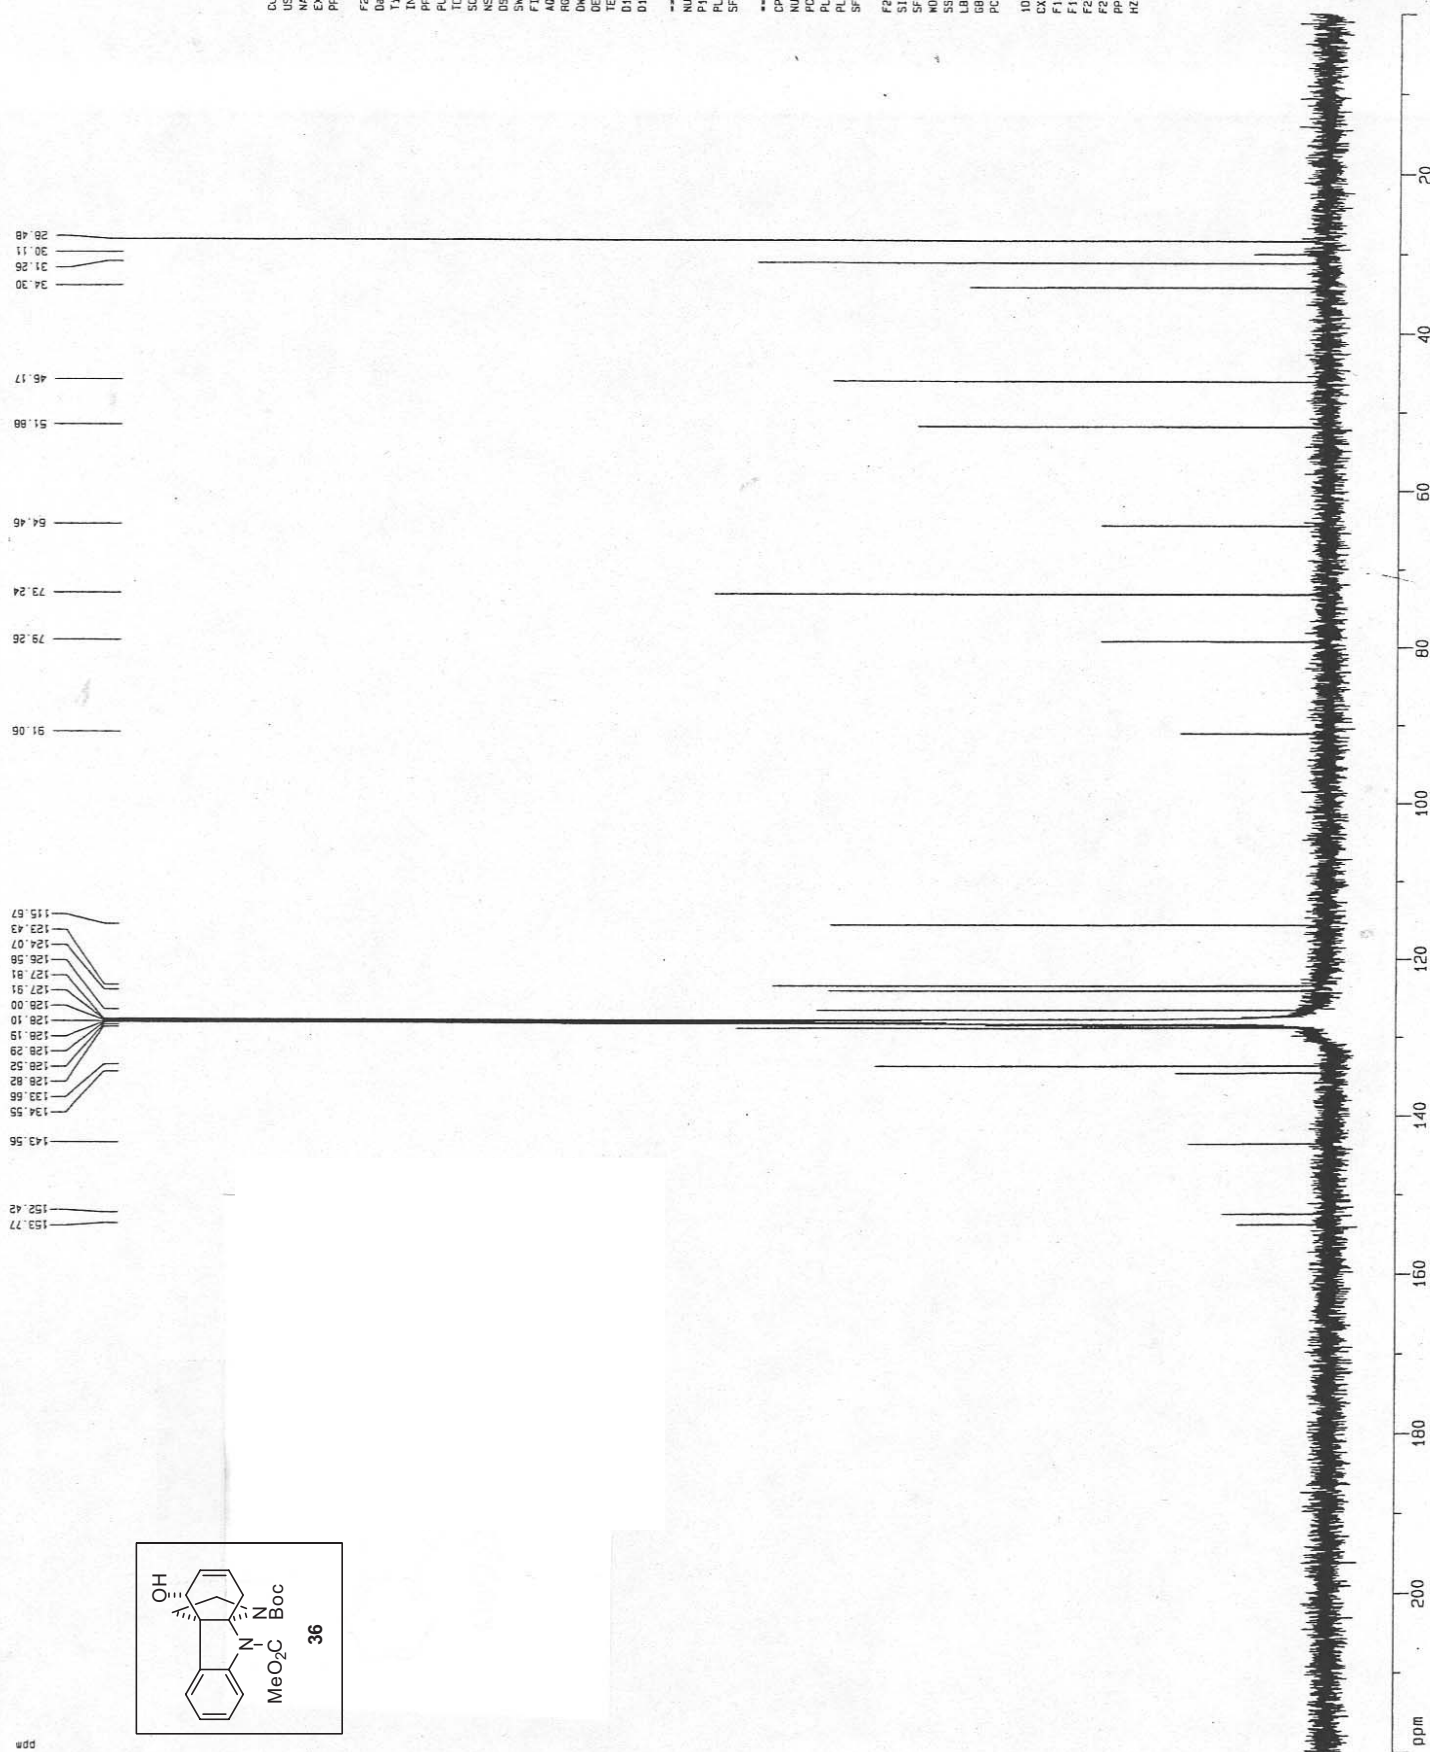

<sup>1</sup>H spectrum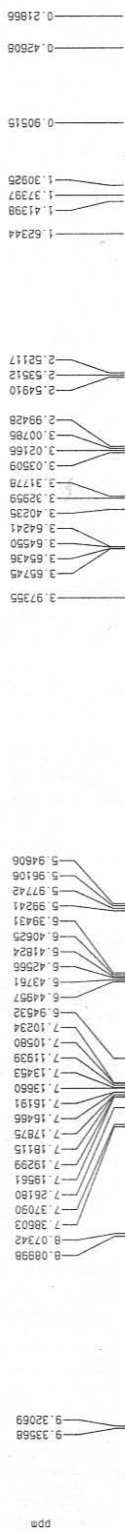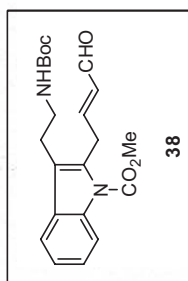

Current Data Parameters  
 USER aaronw  
 NAME indole  
 EXPNO 1  
 PROCNO 1

F2 - Acquisition Parameters  
 Date\_ 20080113  
 Time 11.35  
 INSTRUM gnuco  
 PROBHD 5 mm broadband  
 PULPROG zgpg30  
 TO 81728  
 SOLVENT CDCl<sub>3</sub>  
 NS 8  
 DS 2  
 SWH 8012.620 Hz  
 FIDRES 0.090043 Hz  
 AQ 5.0599398 sec  
 RG 382  
 DM 62.400 usec  
 DE 6.00 usec  
 TE 333.0 K  
 D1 0.1000000 sec  
 ACQRES 0.0000000 sec  
 MCHRG 0.0150000 sec

===== CHANNEL f1 =====  
 NUC1 <sup>1</sup>H  
 P1 11.50 usec  
 PL1 -3.00 dB  
 SFO1 500.0435003 MHz

F2 - Processing parameters  
 SI 65536  
 SF 500.0400270 MHz  
 WDW EM  
 SSB 0  
 LB 0.30 Hz  
 GB 0  
 PC 4.00

1D NMR plot parameters  
 CX 22.80 cm  
 CT 13.00 cm  
 FID 10.000 cm  
 F1 5000.40 Hz  
 F2 -1.000 ppm  
 F3 -500.04 Hz  
 FWHM 0.48246 ppm/cm  
 HZCM 241.24739 Hz/cm

<sup>13</sup>C spectrum with <sup>1</sup>H decoupling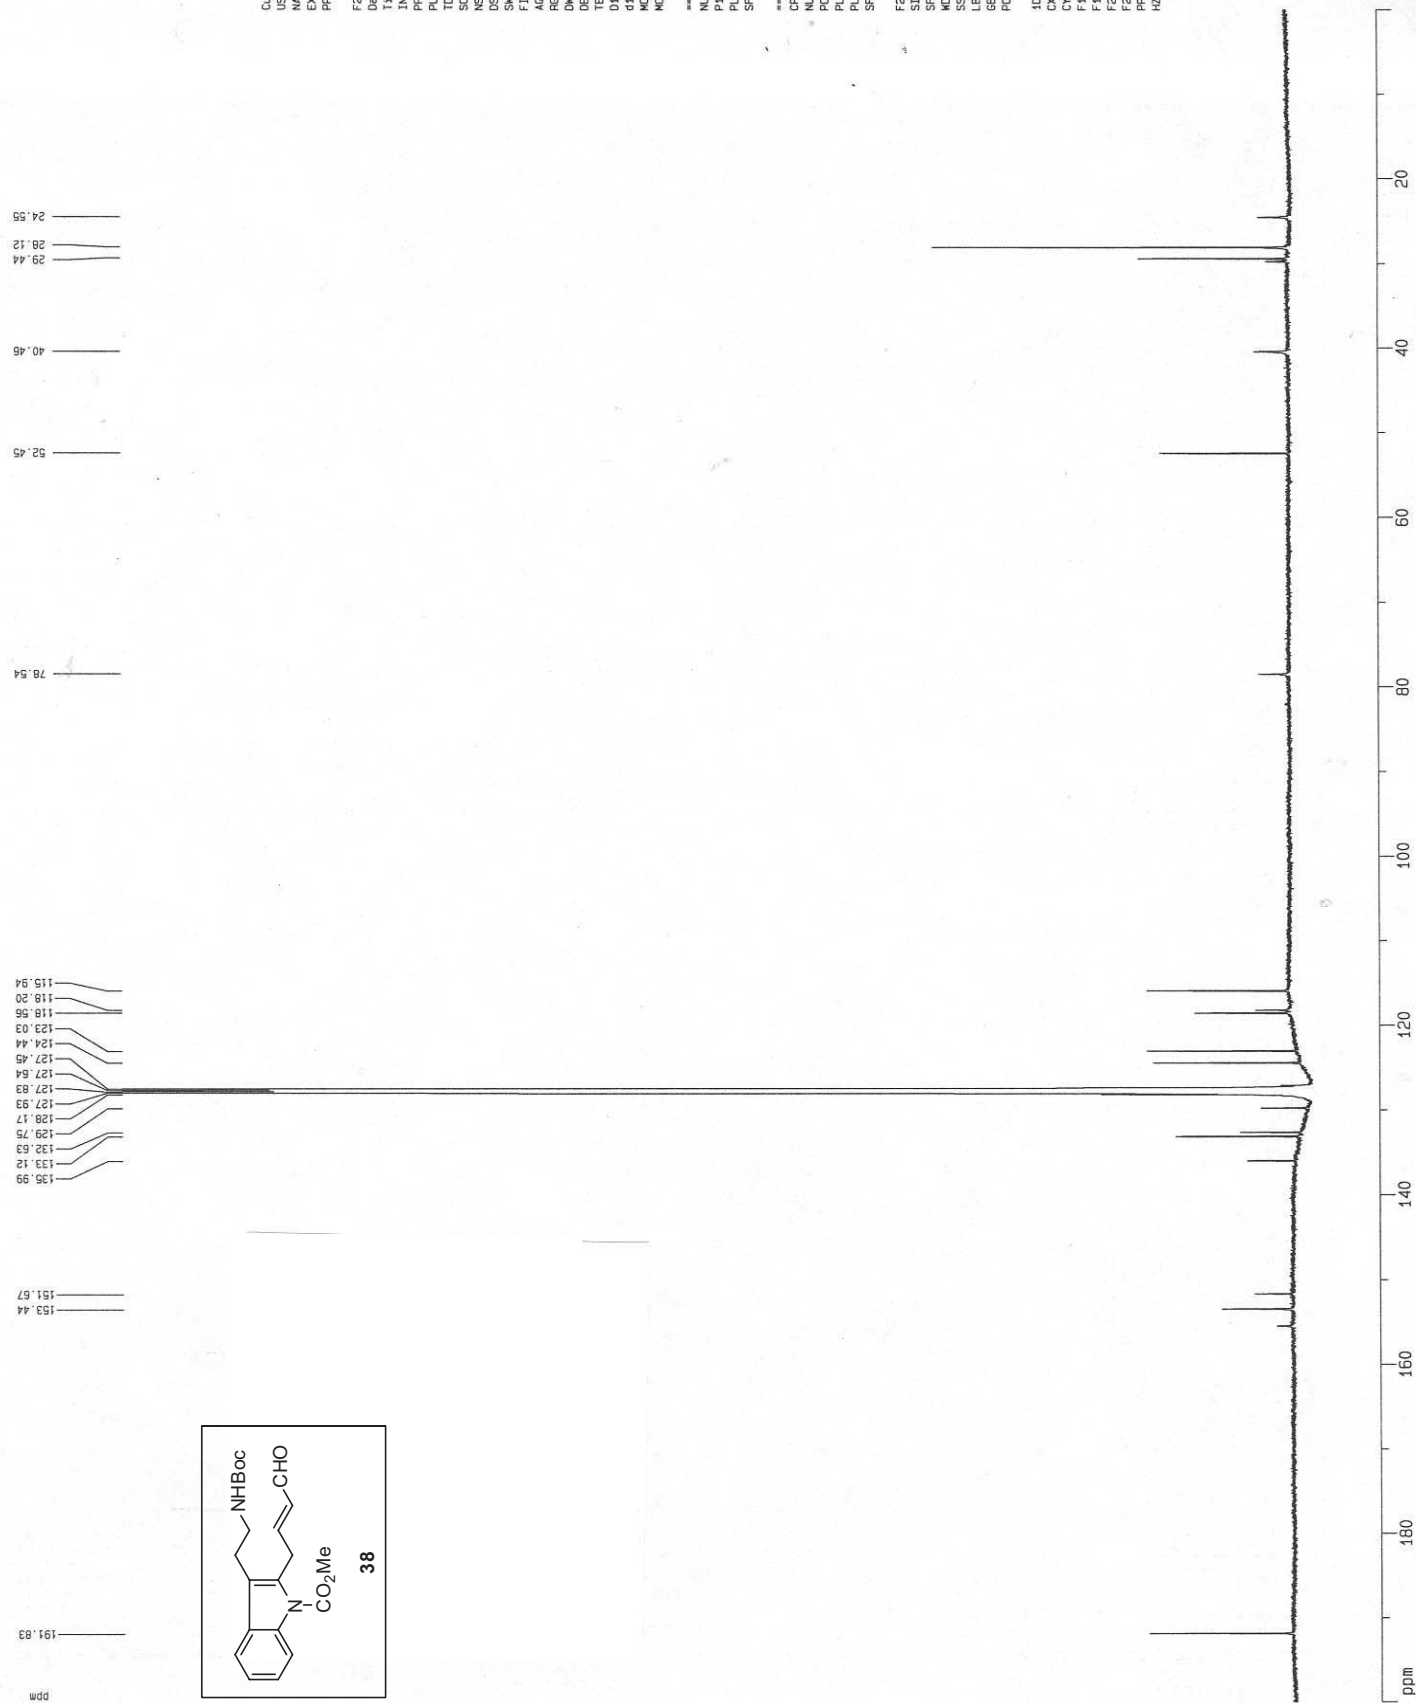



<sup>1</sup>H spectrum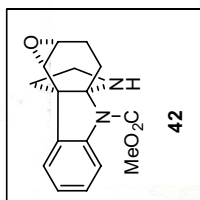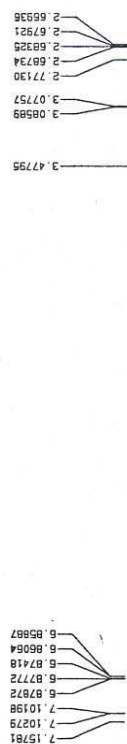

Current Data Parameters

USER dounay

NAME abd-1v-46-x

EXPNO 1

PROCNO 1

F2 - Acquisition Parameters

Date\_ 20040212

Time 3.08

INSTRUM 00093000

PROBHD 5 mm inverse

PULPROG zgpg30

TD 65536

TO 61728

SOLVENT CSO6

NS 4

DS 2

SWH 6012.620 Hz

FIDRES 0.098043 Hz

AQ 5.0398774 sec

RG 256

DN 62.400 usec

DE 6.00 usec

TE 333.0 K

D1 0.10000000 sec

\*\*\*\*\* CHANNEL f1 \*\*\*\*\*

NUC1 <sup>1</sup>H

P1 13.00 usec

PL1 -1.00 dB

SFO1 500.235015 MHz

F2 - Processing parameters

SF 500.235015 MHz

WDW EM

SSB 0

LB 0.30 Hz

GB 0

PC 4.00

40 NMR plot parameters

CX 22.80 cm

FIP 10.500 ppm

F1 5252.31 Hz

F2 -250.11 Hz

PPMCH 0.48246 ppm/cm

HZCM 241.33421 Hz/cm

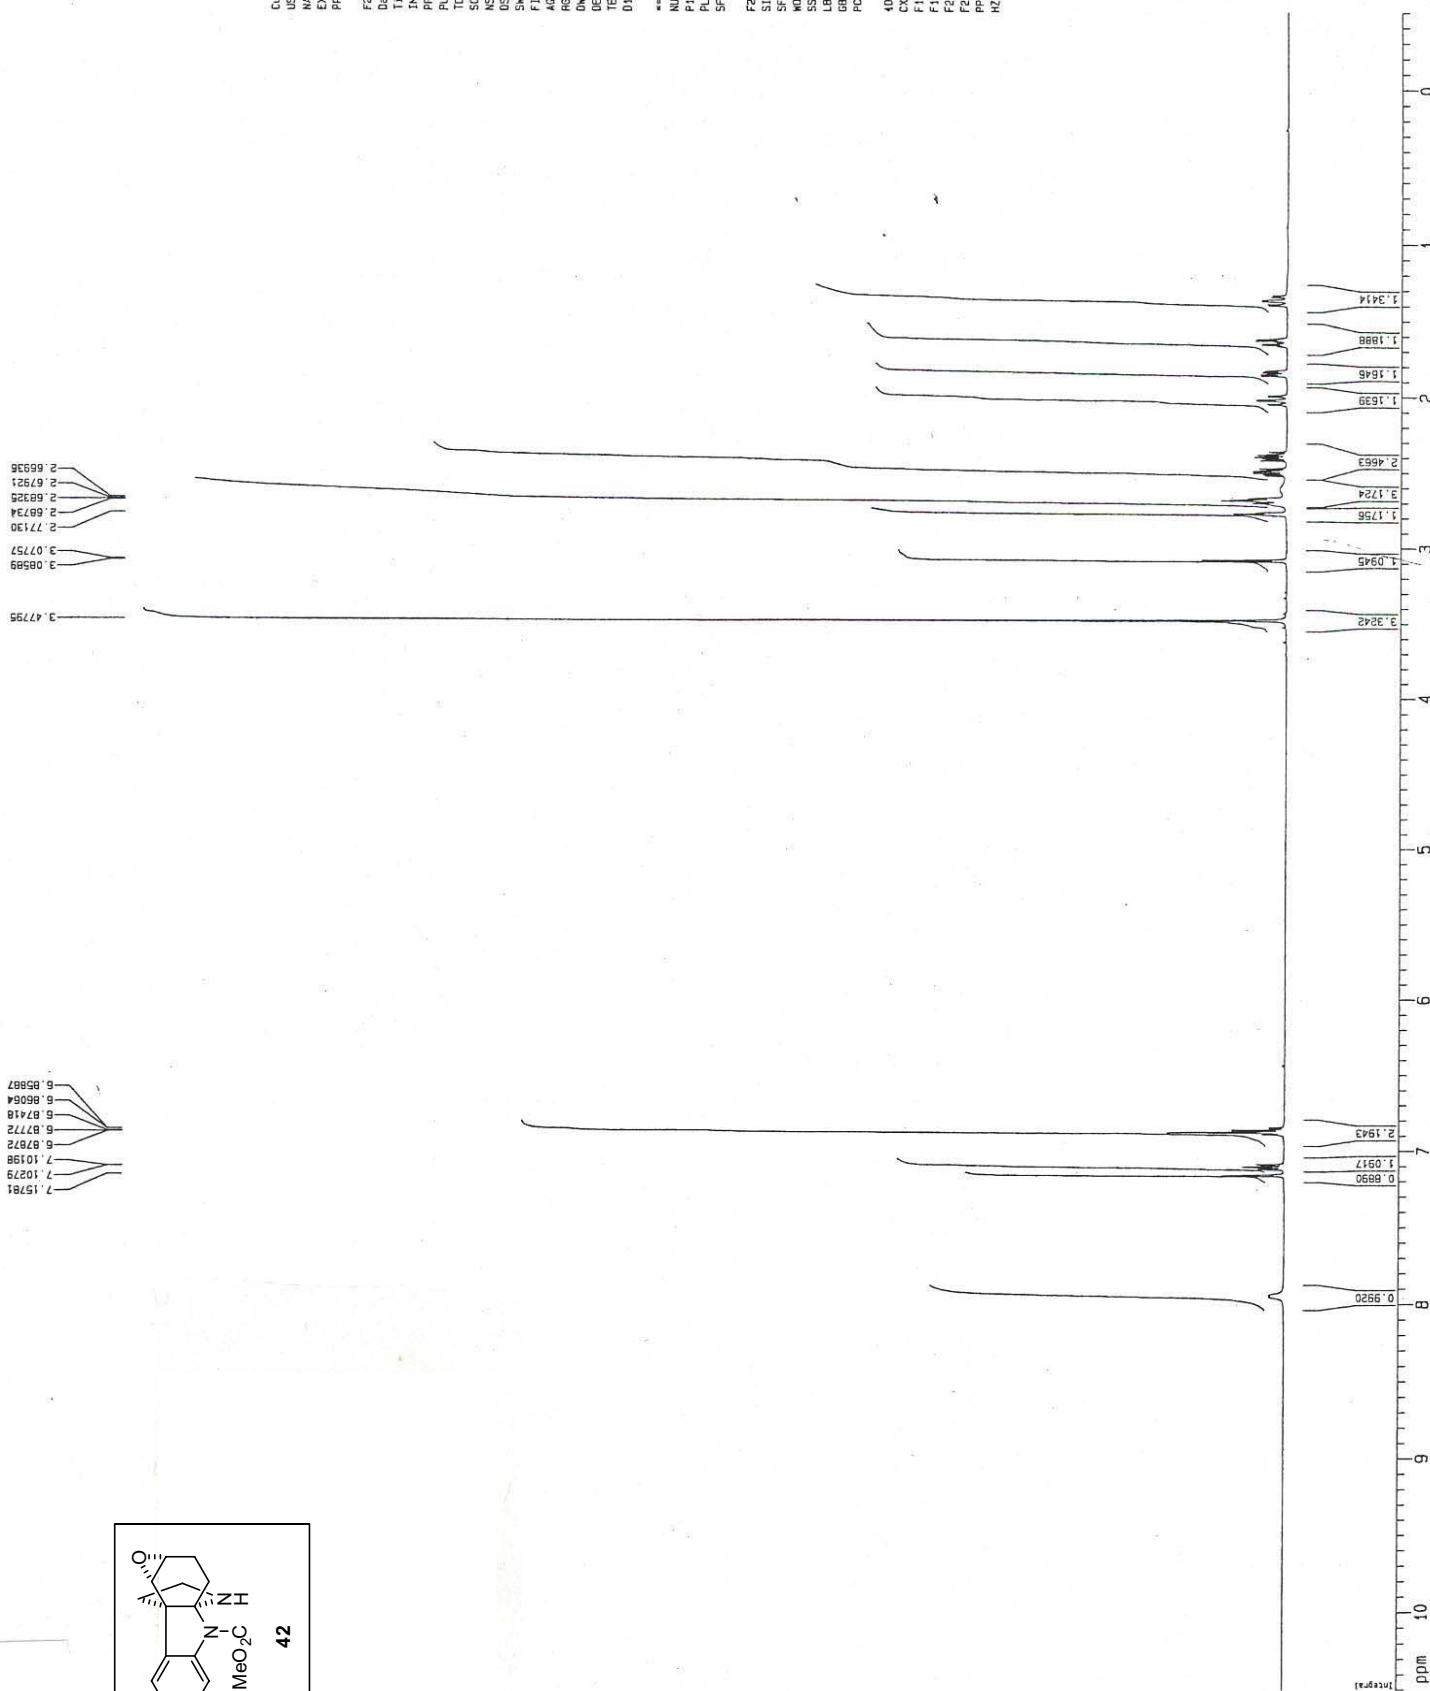

<sup>13</sup>C spectrum with <sup>1</sup>H decoupling

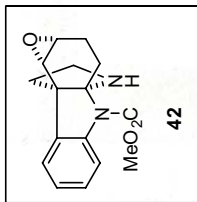

154.20  
144.25  
133.72  
129.17  
128.68  
128.58  
128.39  
128.30  
126.20  
124.20  
123.58  
115.76  
86.79  
57.55  
54.37  
53.19  
52.19  
43.34  
38.01  
27.76  
21.44

Current Data Parameters  
USER dounay  
NAME abd-1V-46-x  
EXPNO 2  
PROCNO 1

F2 - Acquisition Parameters  
Date\_ 20040212  
Time 9.13  
INSTRUM oregon500  
PROBHD 5 mm broadband  
PULPROG zgpg30  
TD 65536  
SOLVENT dms  
NS 356  
DS 4  
SWH 30303.031 Hz  
FIDRES 0.462388 Hz  
AQ 1.0813940 sec  
RG 5160.6  
DM 16.500 usec  
DE 4.50 usec  
TE 300.2 K  
D1 0.25000000 sec  
D11 0.03000000 sec

\*\*\*\*\* CHANNEL f1 \*\*\*\*\*  
NUC1 <sup>13</sup>C  
P1 22.50 usec  
PL1 -6.00 dB  
SFO1 125.7942048 MHz

\*\*\*\*\* CHANNEL f2 \*\*\*\*\*  
CPDPRG2 waltz16  
NUC2 <sup>1</sup>H  
PCPD2 80.00 usec  
PL2 -1.00 dB  
PL12 14.40 dB  
SFO2 500.230013 MHz

F2 - Processing parameters  
SI 65536  
SF 125.7803207 MHz  
WDW EM  
SSB 0  
LB 1.00 Hz  
GB 0  
PC 2.00

10 NMR plot parameters  
CX 22.80 cm  
F1P 220.000 dps  
F1 27671.57 Hz  
F2P 0.000 dps  
F2 0.000 Hz  
FREQM 9.64582600e+08 Hz/cm  
HZCM 1213.66980 Hz/cm

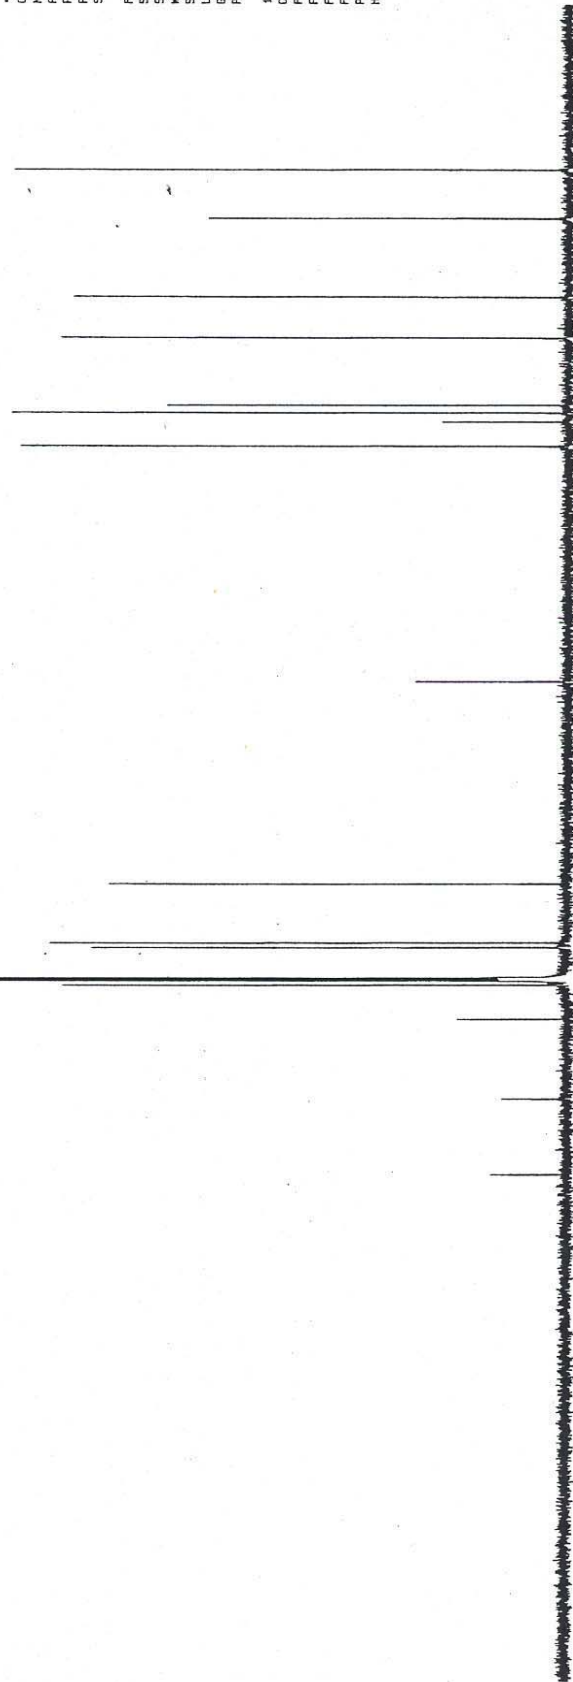

200 180 160 140 120 100 80 60 40 20 ppm

<sup>1</sup>H spectrum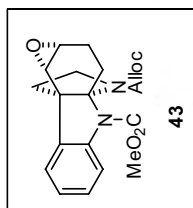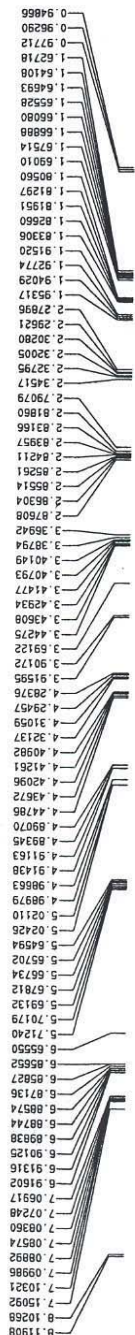

Current Data Parameters  
 USER aaronw  
 NAME adw-11-074  
 EXPNO 1  
 PROCNO 1

F2 - Acquisition Parameters  
 Date\_ 20040913  
 Time 14.09  
 INSTRUM spect  
 PULPROG zgpg30  
 PROBHD 5 mm broadband  
 T1 1930  
 T1 81728  
 SOLVENT CDCl3  
 NS 2  
 DS 2  
 SWH 8012.620 Hz  
 FIDRES 0.098043 Hz  
 AQ 5.0988774 sec  
 RG 20.2  
 DM 62.400 usec  
 DE 6.00 usec  
 TE 300.0 K  
 D1 0.10000000 sec

===== CHANNEL f1 =====  
 NUC1 1H  
 P1 11.50 usec  
 PL1 -3.00 dB  
 SFO1 500.1353010 MHz

F2 - Processing parameters  
 SI 65536  
 SF 500.1500000 MHz  
 WDW EM  
 SSB 0  
 LB 0.30 Hz  
 GB 0  
 PC 4.00

1D NMR plot parameters  
 CX 22.80 cm  
 FIP 10.000 ppm  
 F1 5001.50 Hz  
 F2 -1.000 ppm  
 F2 -500.15 Hz  
 PPMCM 0.48246 ppm/cm  
 HZCM 241.30045 Hz/cm

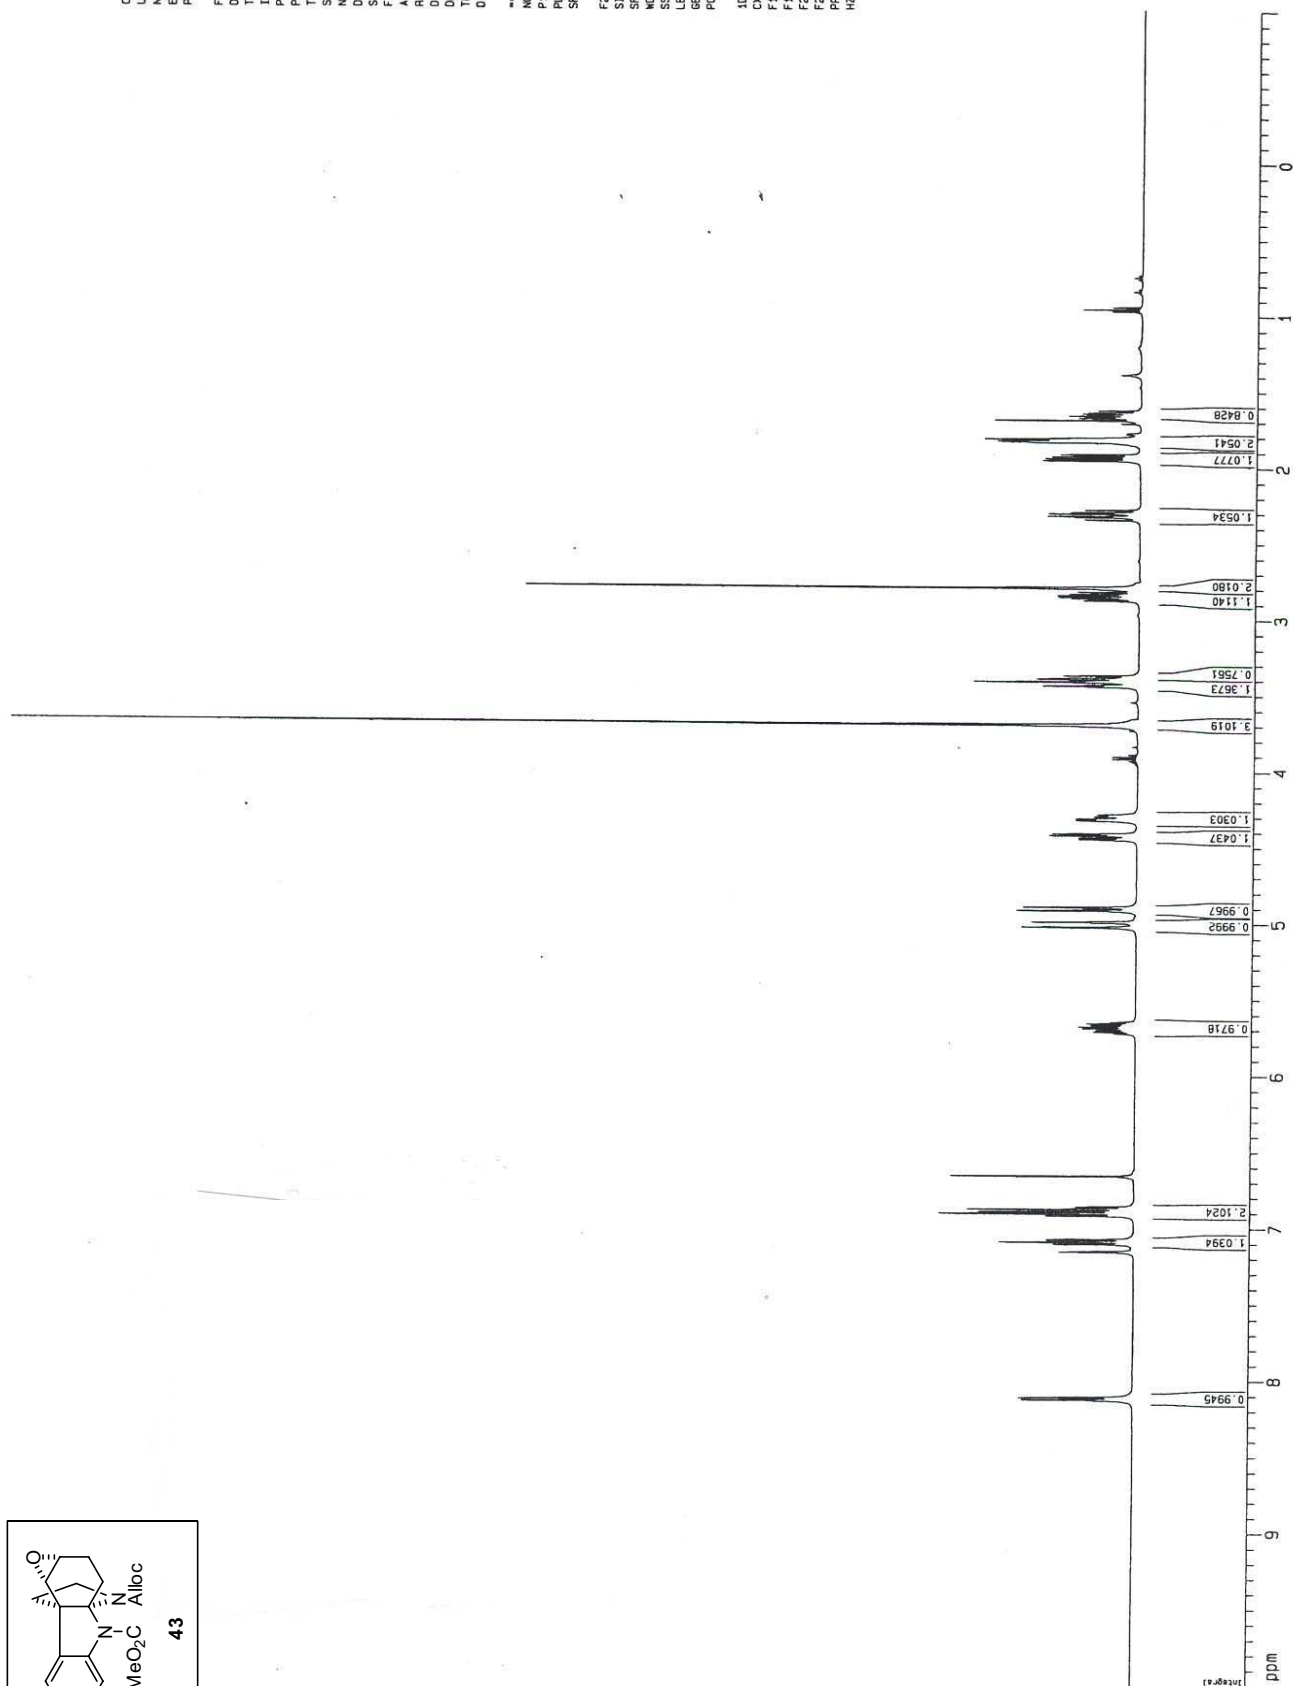

<sup>13</sup>C spectrum with <sup>1</sup>H decoupling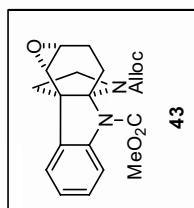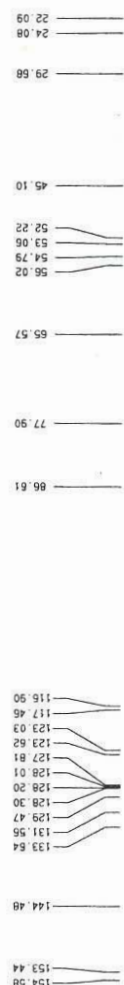

Current Data Parameters  
 USER aeromw  
 NUC1 13C  
 EXPNO 2  
 PROCNO 1

F2 - Acquisition Parameters  
 Date\_ 20040913  
 Time 14.16  
 INSTRUM gpc500  
 PROBHD 5 mm broadband  
 PULPROG zgpg30  
 TO 65536  
 SOLVENT CDCl3  
 NS 565  
 DS 4  
 SMH 30303.031 Hz  
 FIDRES 0.462388 Hz  
 AQ 1.0813940 sec  
 RG 5792.6  
 DM 16.500 usec  
 DE 4.50 usec  
 TE 300.0 K  
 D1 0.25000000 sec  
 D11 0.03000000 sec

===== CHANNEL f1 =====  
 NUC1 13C  
 P1 6.80 usec  
 PL1 0.00 dB  
 SF01 125.7768019 MHz

===== CHANNEL f2 =====  
 CPDPRG2 waltz16  
 NUC2 1H  
 P2 80.00 usec  
 PL2 -3.00 dB  
 PL12 15.40 dB  
 SF02 500.1355010 MHz

F2 - Processing parameters  
 SI 65536  
 SF 125.7627660 MHz  
 EQ 0  
 SSF 0  
 LB 1.00 Hz  
 GB 0  
 PC 2.00

10 NMR plot parameters  
 CX 22.80 cm  
 FIP 220.000 ppa  
 F1 27667.81 Hz  
 F2P -10.000 ppa  
 F2 -1257.63 Hz  
 PPRCN 10.08772 ppa/cm  
 RECN 1286.65955 Hz/cm

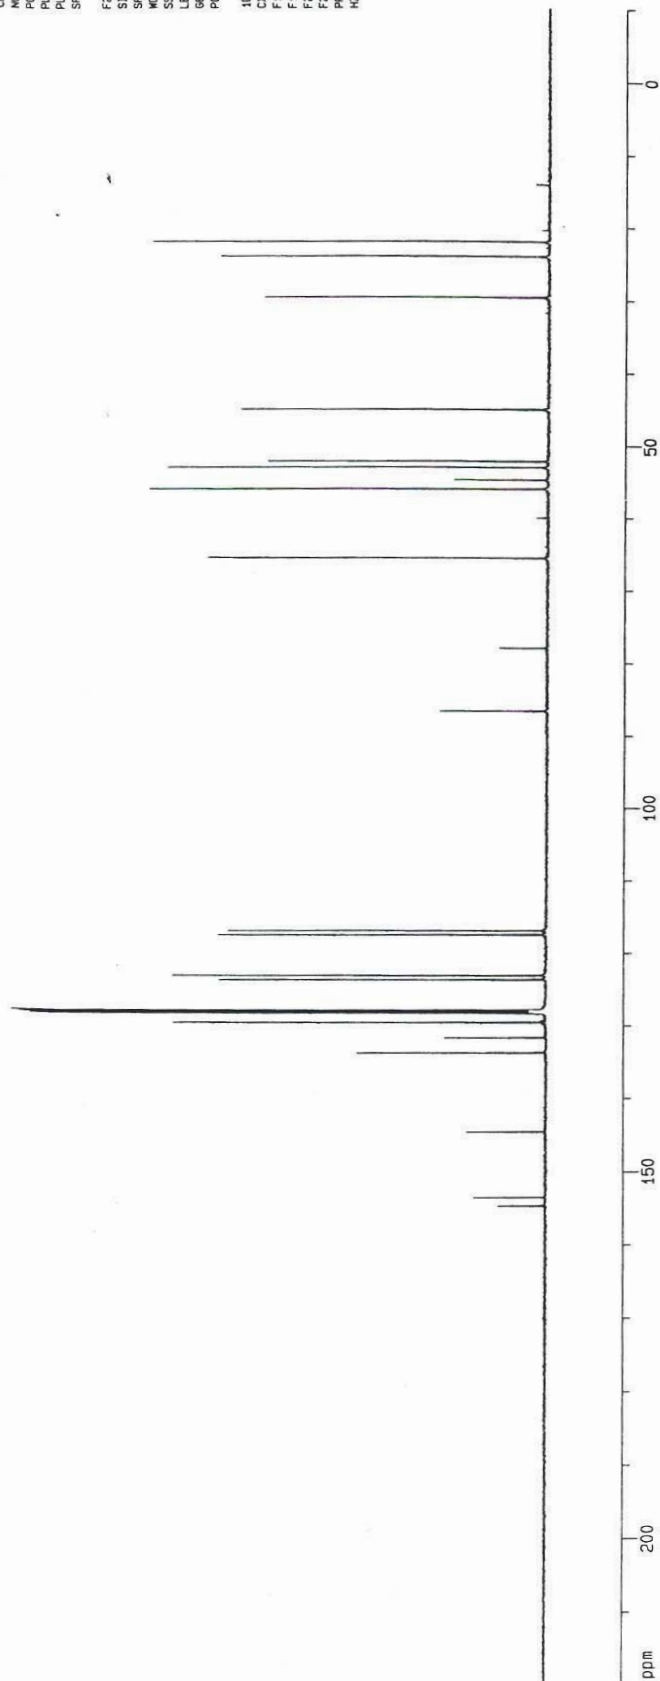



<sup>1</sup>H spectrum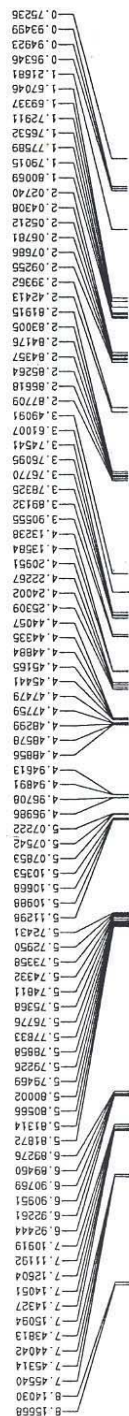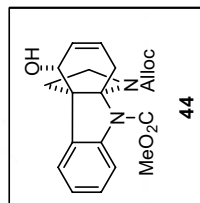

Current Data Parameters  
 USER admin  
 NAME adm-II-087  
 EXPNO 1  
 PROCNO 1

F2 - Acquisition Parameters  
 Date\_ 20040915  
 Time 13.15  
 INSTRUM spect  
 PROGRAM g300  
 PULPROG zg30  
 TD 81728  
 SOLVENT CDCl<sub>3</sub>  
 NS 8  
 DS 2  
 SWH 8012.820 Hz  
 FIDRES 0.058043 Hz  
 AQ 5.0398774 sec  
 RG 40.3  
 DM 62.400 usec  
 DE 6.00 usec  
 TE 300.0 K  
 D1 0.1000000 sec

===== CHANNEL f1 =====  
 NUC1 <sup>1</sup>H  
 P1 11.50 usec  
 PL1 -3.00 dB  
 SF01 500.1355010 MHz

F2 - Processing parameters  
 SI 65536  
 SF 500.1350000 MHz  
 WDW EM  
 SSB 0  
 LB 0.30 Hz  
 GB 0  
 PC 4.00

1D NMR plot parameters  
 CX 22.80 cm  
 FIP 10.000 ppm  
 F1 5001.50 Hz  
 F2 -1.000 ppm  
 F2 -500.15 Hz  
 PPMCM 0.48246 ppm/cm  
 HZCM 241.30045 Hz/cm

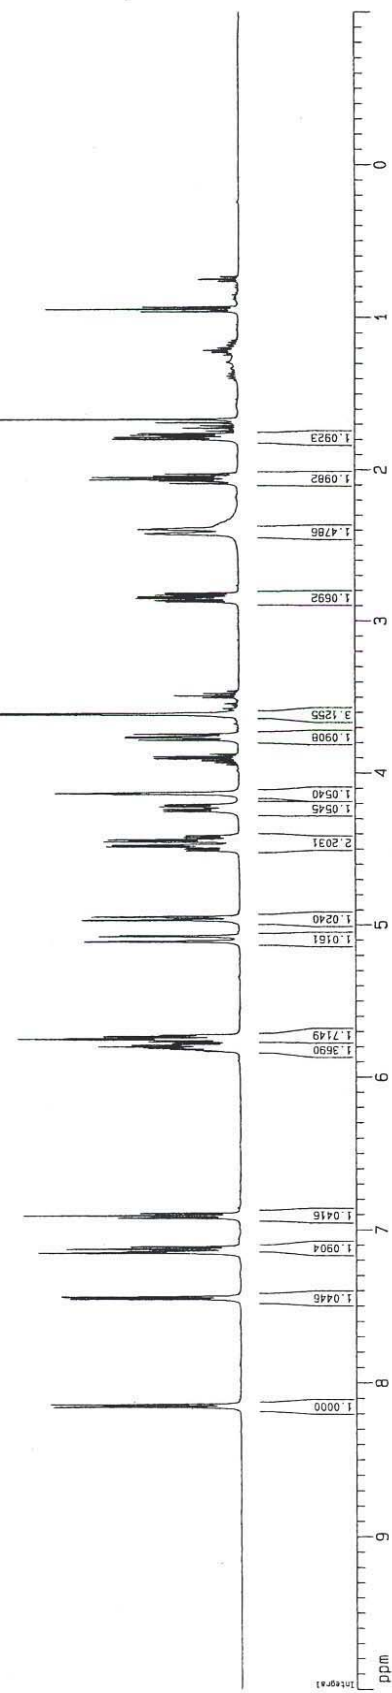

<sup>13</sup>C spectrum with <sup>1</sup>H decoupling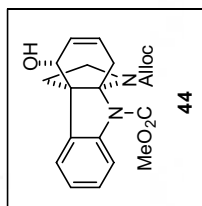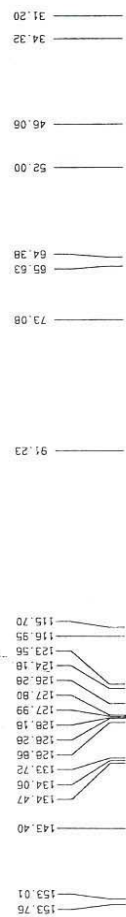

Current Data Parameters  
 USER aaronw  
 NAME abw-11-031  
 EXPNO 2  
 PROCNO 1

F2 - Acquisition Parameters  
 Date\_ 20040821  
 Time 17:50  
 INSTRUM spect  
 PROBHD 5 mm broadband  
 PULPROG zgpg30  
 TO 65536  
 SOLVENT CDCl<sub>3</sub>  
 NS 719  
 DS 4  
 SWH 30303.031 Hz  
 FIDRES 0.462388 Hz  
 AQ 1.0813940 sec  
 RG 4096  
 DW 16.500 usec  
 DE 4.50 usec  
 TE 300.0 K  
 D1 0.25000000 sec  
 D11 0.03000000 sec

\*\*\*\*\* CHANNEL f1 \*\*\*\*\*  
 NUC1 <sup>13</sup>C  
 P1 6.80 usec  
 PL1 0.00 dB  
 SF01 125.7766019 MHz

\*\*\*\*\* CHANNEL f2 \*\*\*\*\*  
 CDP062 waltz16  
 NUC2 <sup>1</sup>H  
 P2 80.00 usec  
 PL2 -3.00 dB  
 SF02 500.1355010 MHz

F2 - Processing parameters  
 SI 65536  
 SF 125.7627680 MHz  
 WDW EM  
 SSB 0  
 LB 1.00 Hz  
 GB 0  
 PC 2.00

1D NMR plot parameters  
 CX 22.80 cm  
 F1P 220.000 ppm  
 F1 27667.81 Hz  
 F2P -10.000 ppm  
 F2 -1257.63 Hz  
 FREQM 10.08772 ppm/cm  
 HZCM 1269.65955 Hz/cm

ppm 200 150 100 50 0

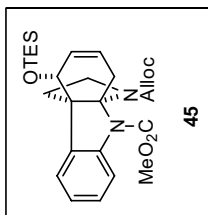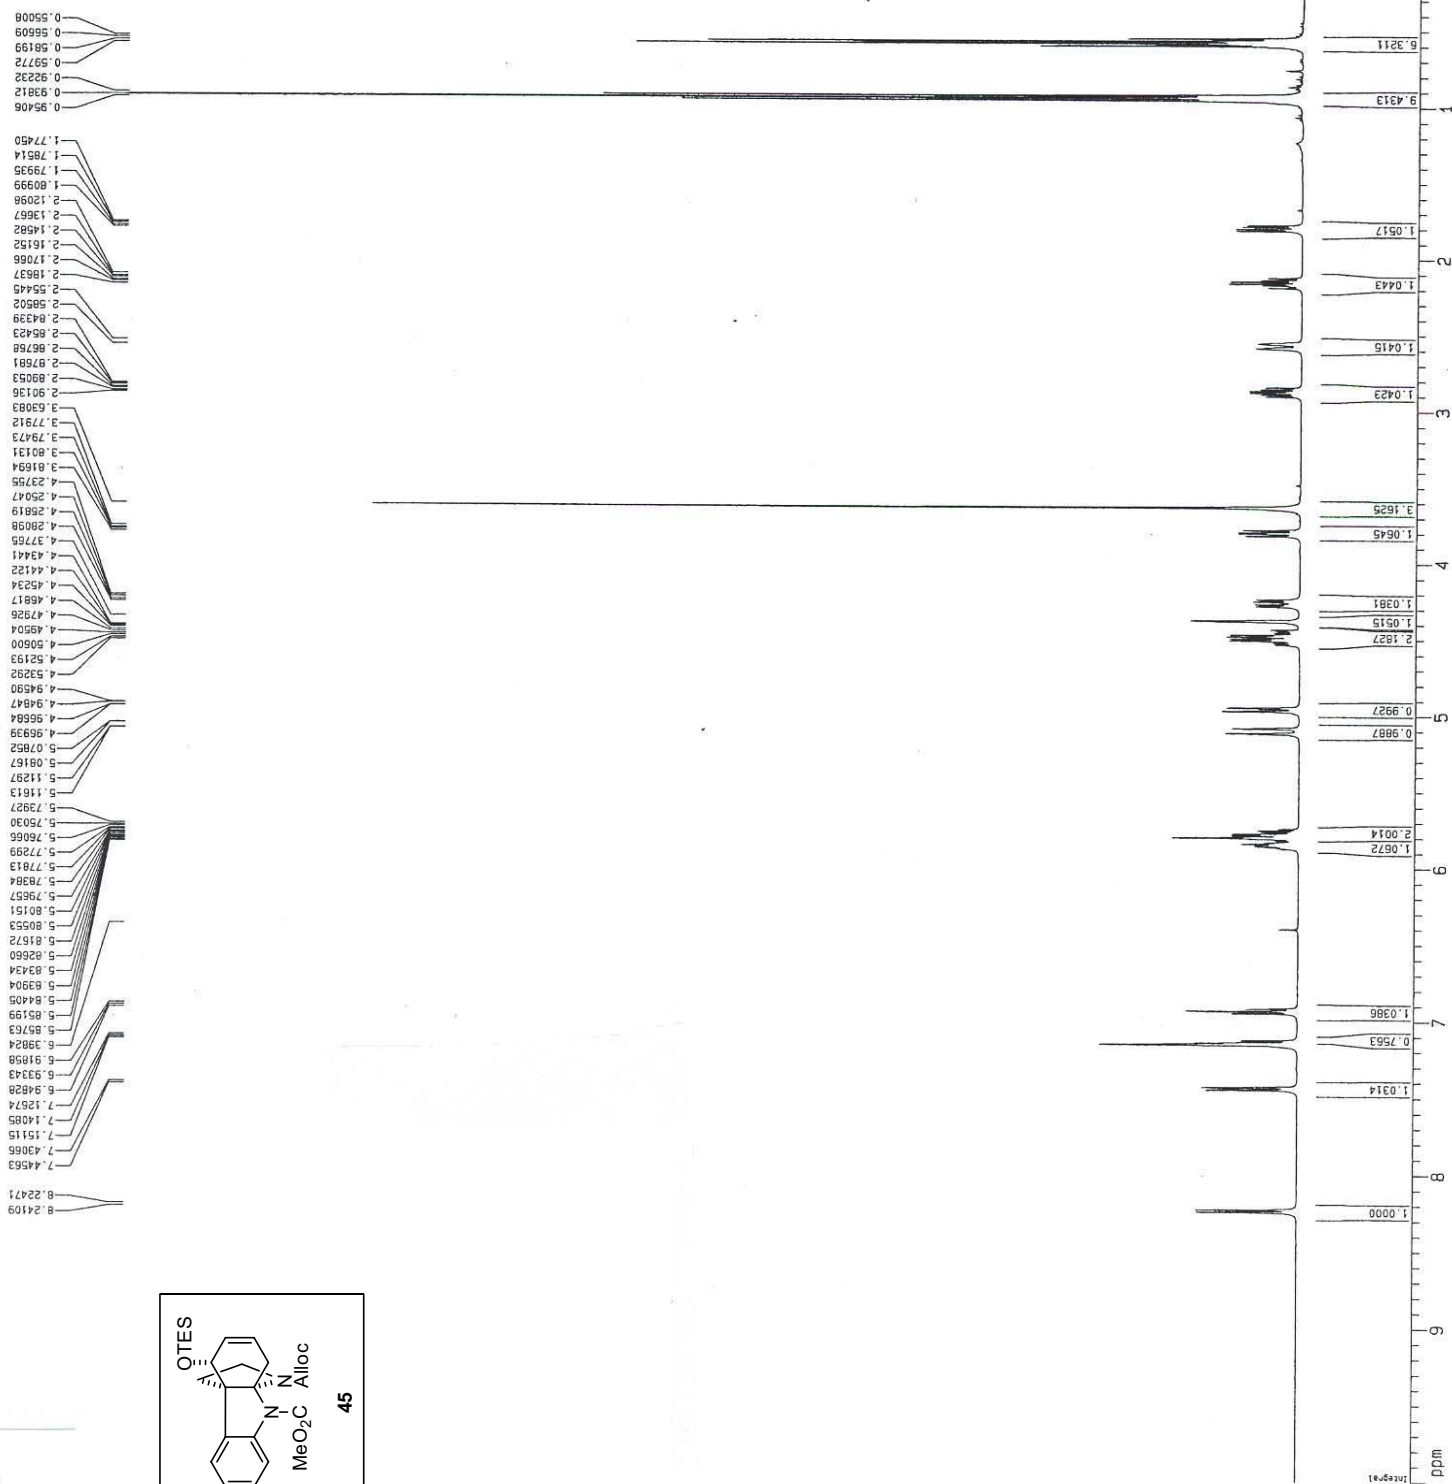

| Current Data Parameters |            | F2 - Acquisition Parameters |                | F2 - Processing parameters |                 | 1D NMR plot parameters |                 |
|-------------------------|------------|-----------------------------|----------------|----------------------------|-----------------|------------------------|-----------------|
| USER                    | adm-11-092 | Date                        | 200-09-22      | NUC1                       | 1H              | CH                     | 1X              |
| NAME                    | adm-11-092 | Time                        | 13.07          | P1                         | 11.50 usec      |                        | 22.60 cm        |
| EXPNO                   | 1          | PROBHD                      | g1500          | PL1                        | -3.00 dB        |                        | 10.00 ppm       |
| PROCNO                  | 1          | PULPROG                     | 5 mm zgpg30    | SFO1                       | 500.1555010 MHz |                        | 5001.50 Hz      |
|                         |            | TD                          | 32768          |                            |                 |                        | -1.000 ppm      |
|                         |            | SOLVENT                     | DMSO           |                            |                 |                        | -500.15 Hz      |
|                         |            | NS                          | 16             |                            |                 |                        | 0.48246 ppm/cm  |
|                         |            | DS                          | 4              |                            |                 |                        | 241.30000 Hz/cm |
|                         |            | SWH                         | 8012.820 KHz   |                            |                 |                        |                 |
|                         |            | F2 - F1                     | 0.038043 Hz    |                            |                 |                        |                 |
|                         |            | TD0ES                       | 5.0398774 sec  |                            |                 |                        |                 |
|                         |            | RG                          | 407.3          |                            |                 |                        |                 |
|                         |            | DE                          | 62.400 usec    |                            |                 |                        |                 |
|                         |            | DM                          | 6.00 usec      |                            |                 |                        |                 |
|                         |            | TE                          | 300.0 K        |                            |                 |                        |                 |
|                         |            | DO                          | 0.10000000 sec |                            |                 |                        |                 |

<sup>13</sup>C spectrum with <sup>1</sup>H decoupling

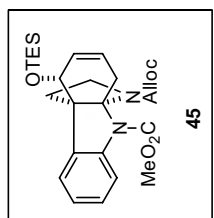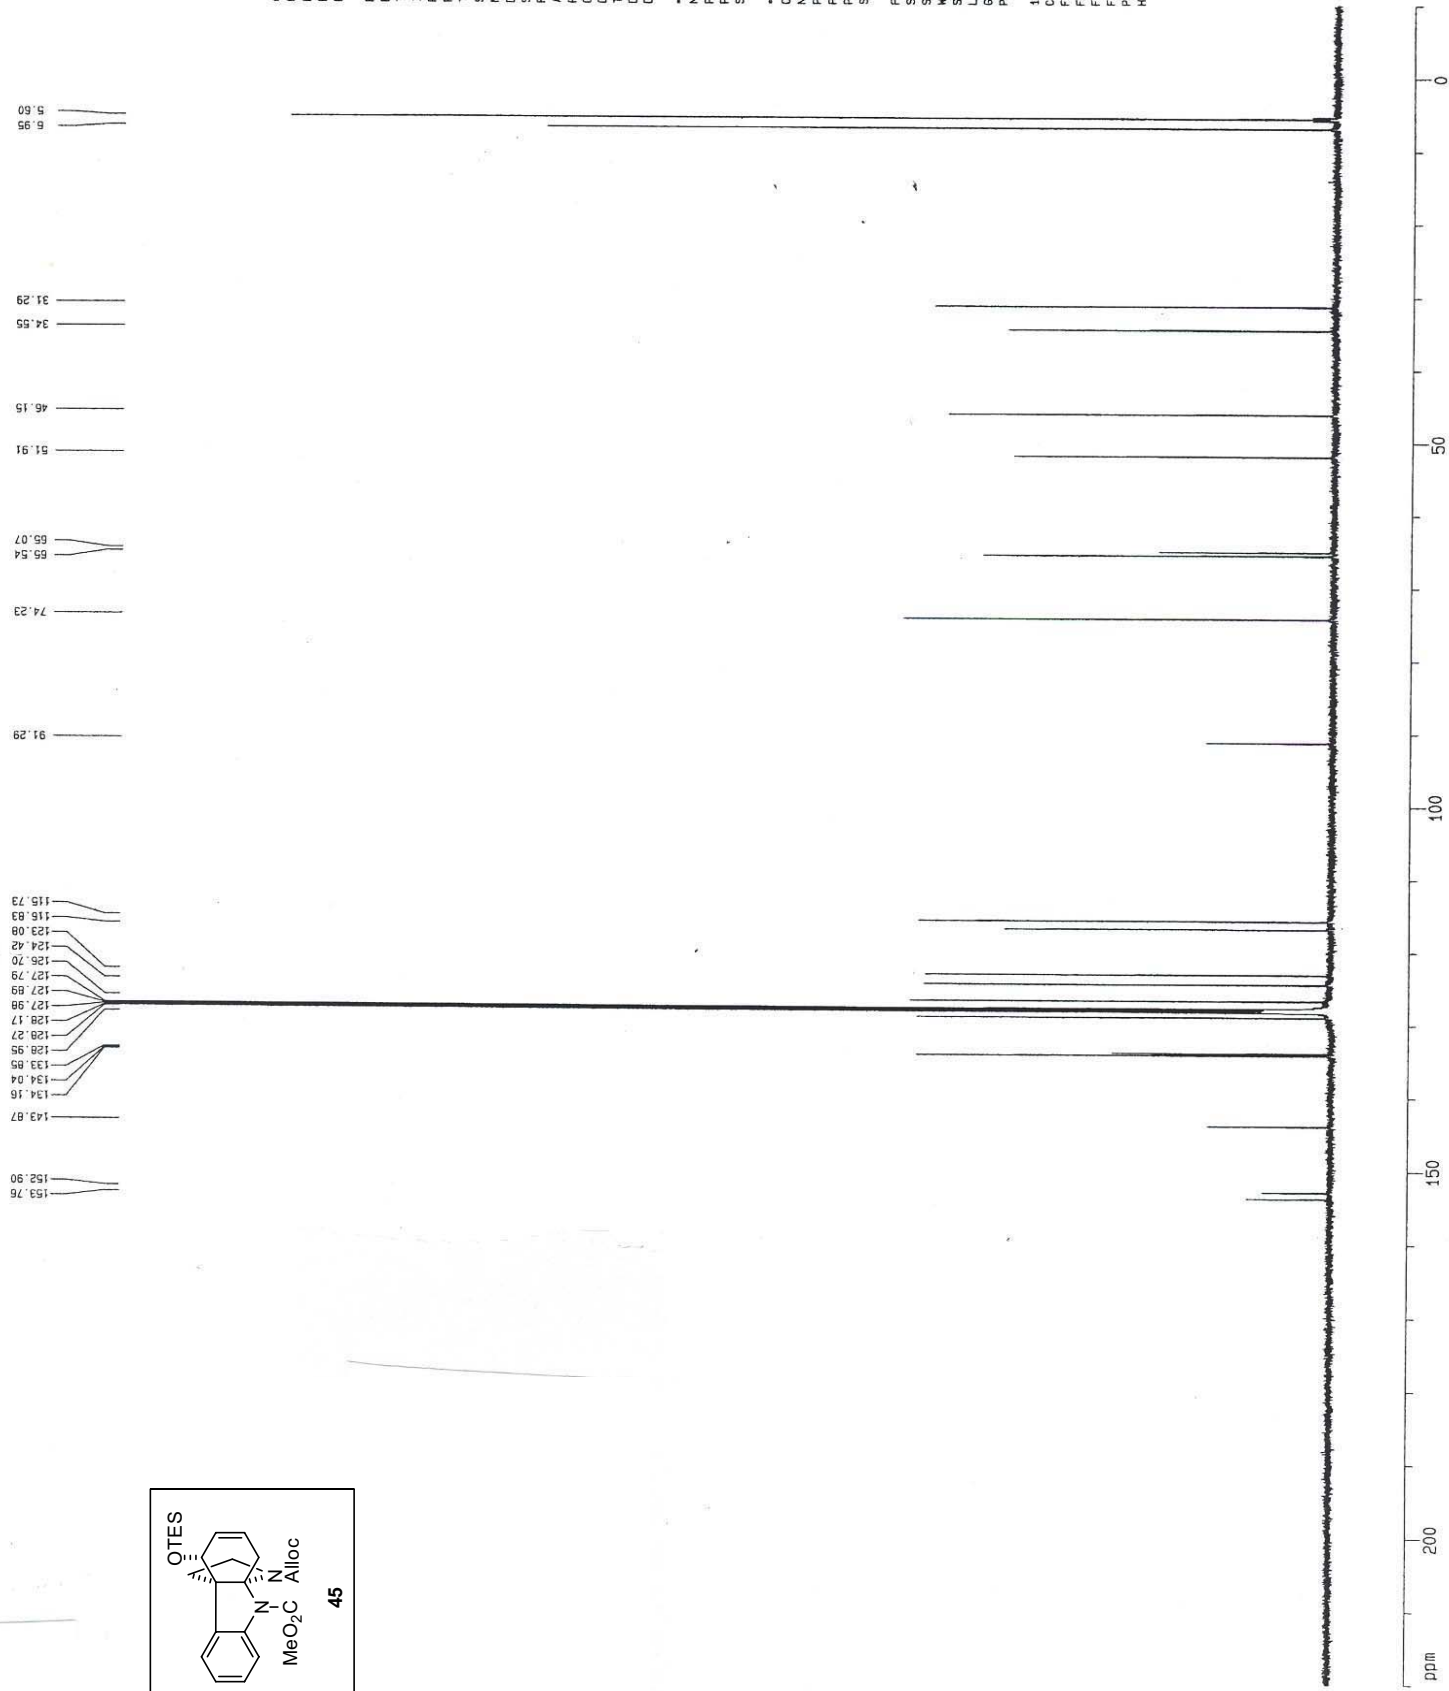

<sup>1</sup>H spectrum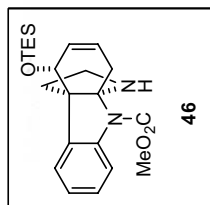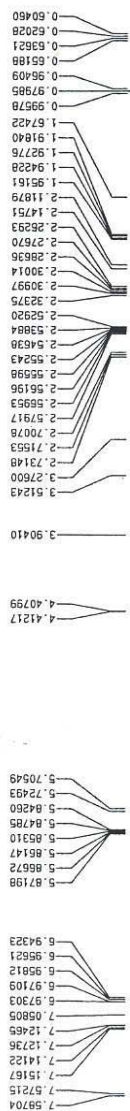

<sup>13</sup>C spectrum with <sup>1</sup>H decoupling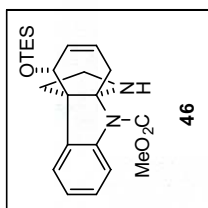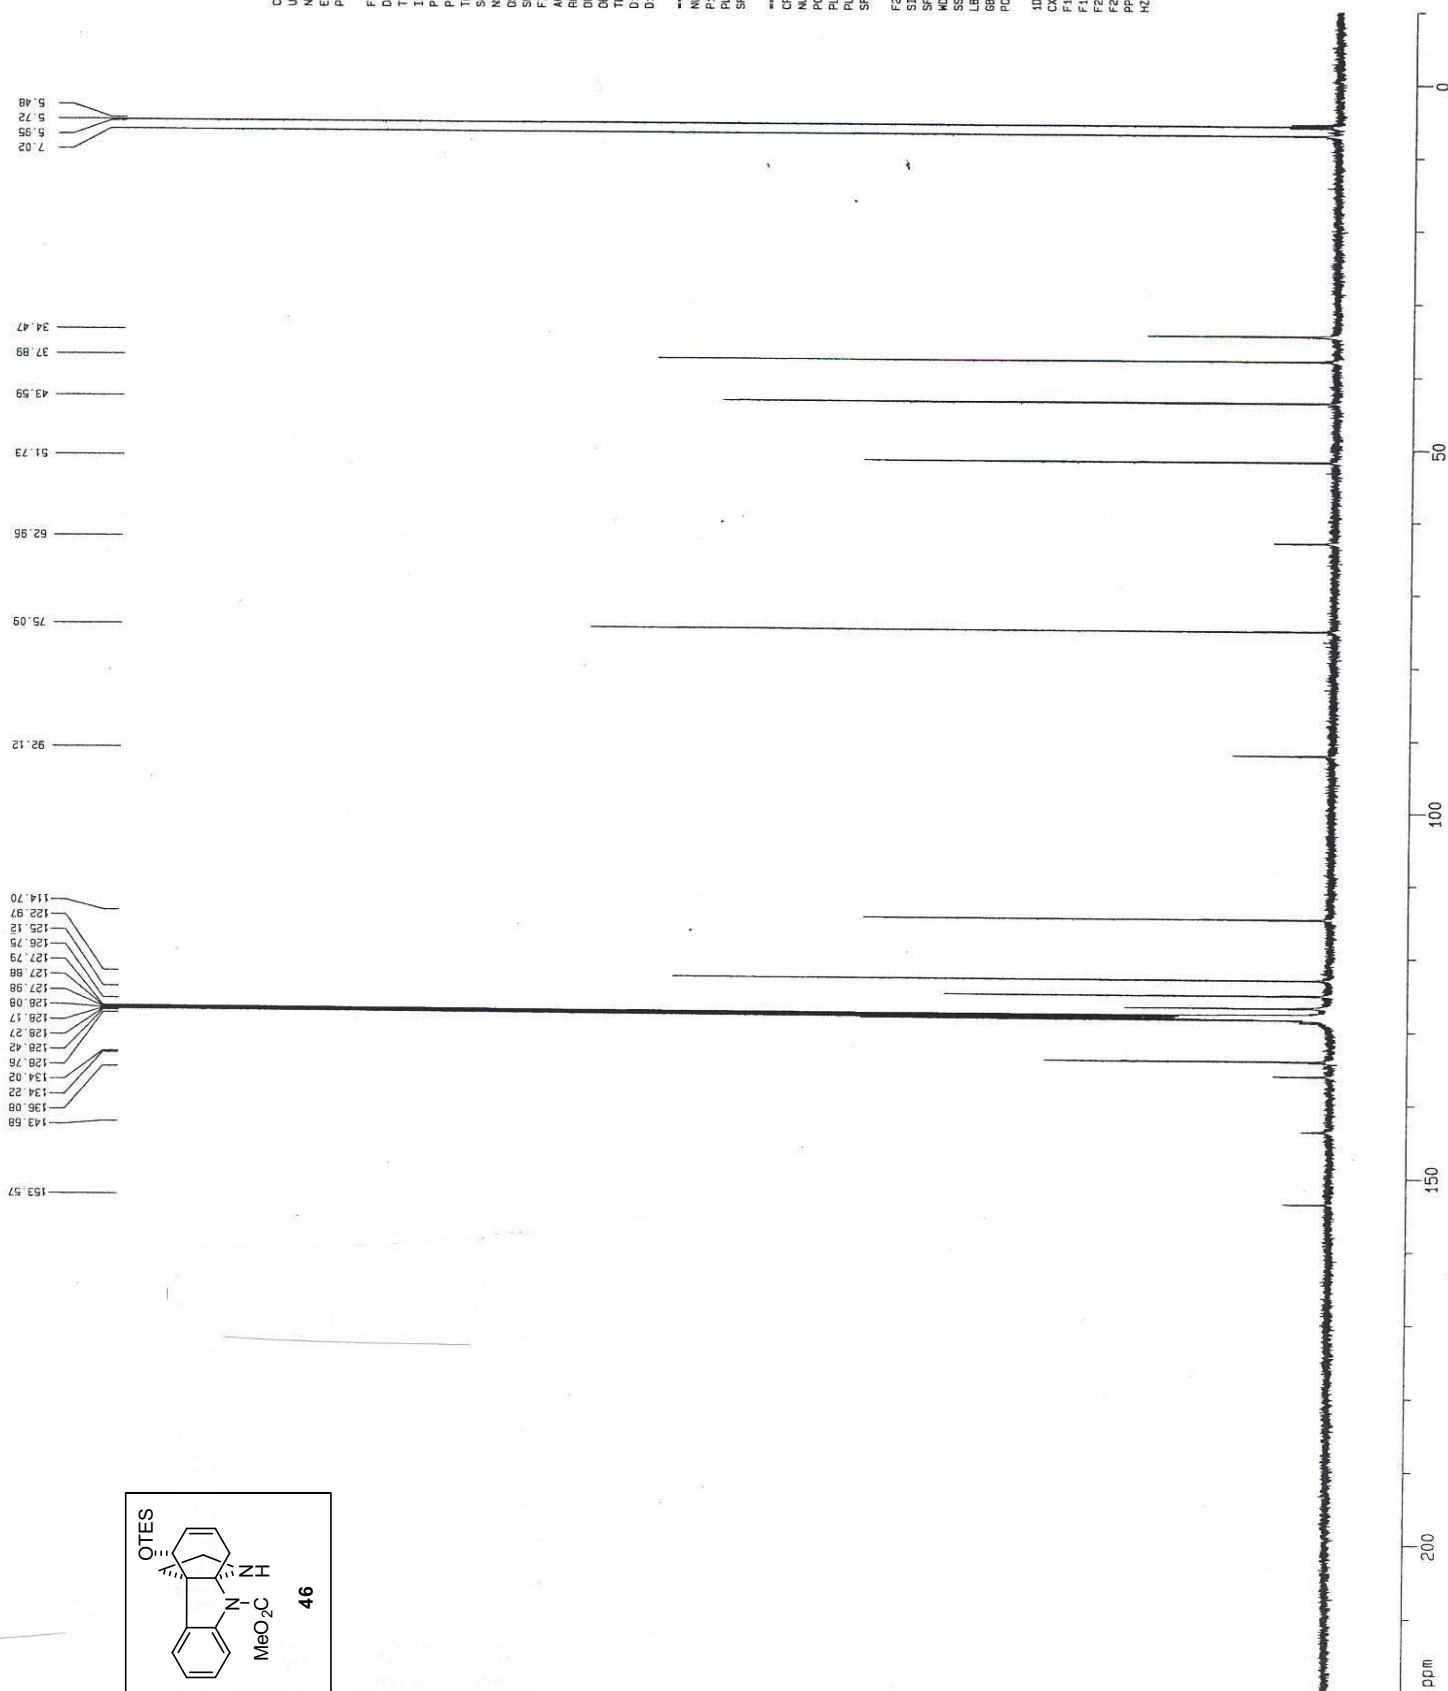



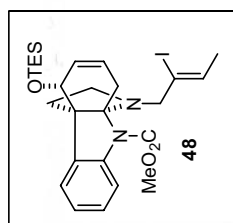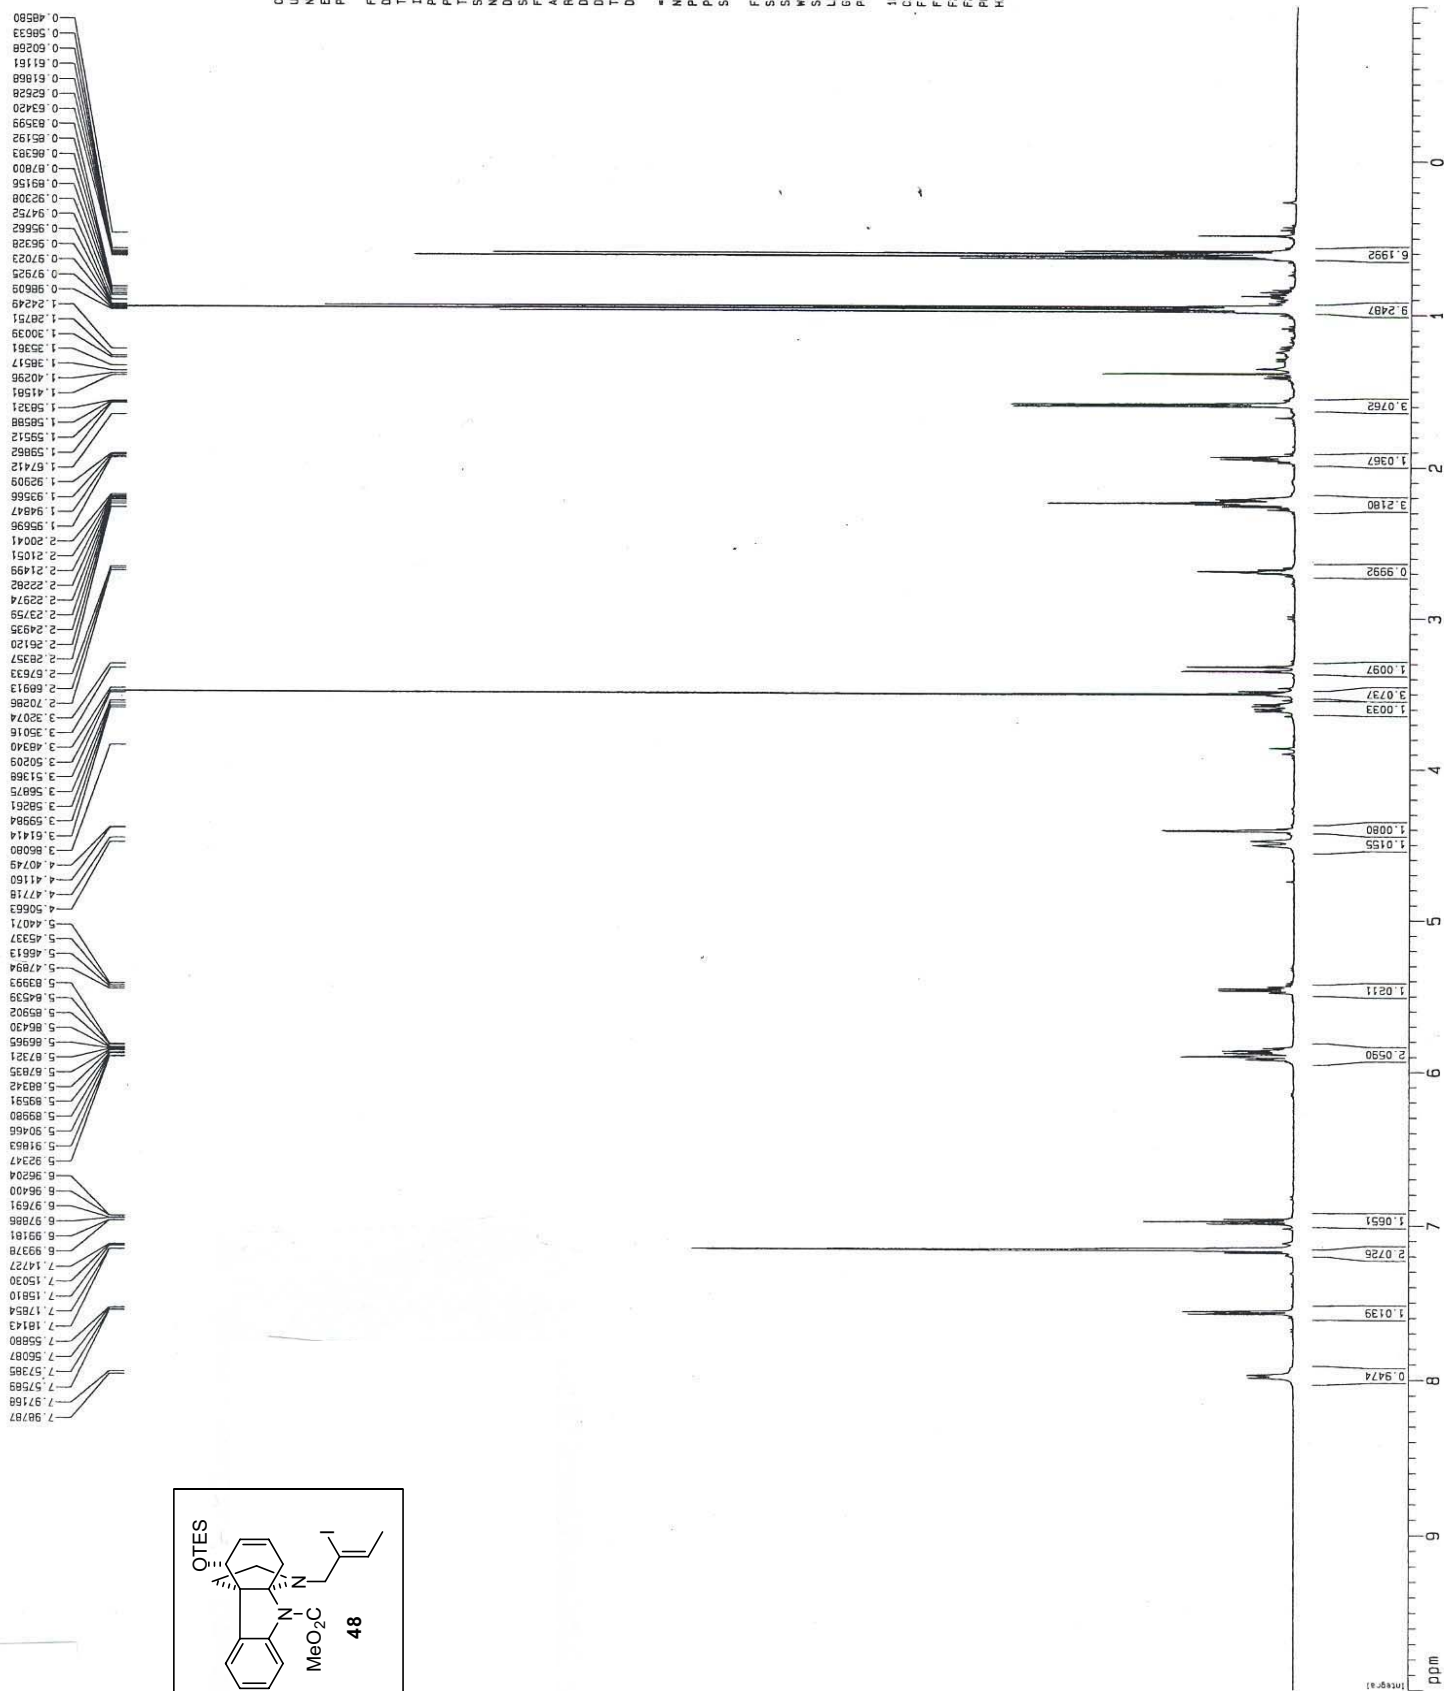

13C spectrum with 1H decoupling

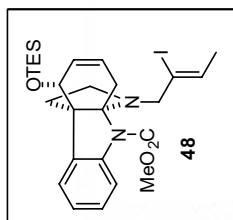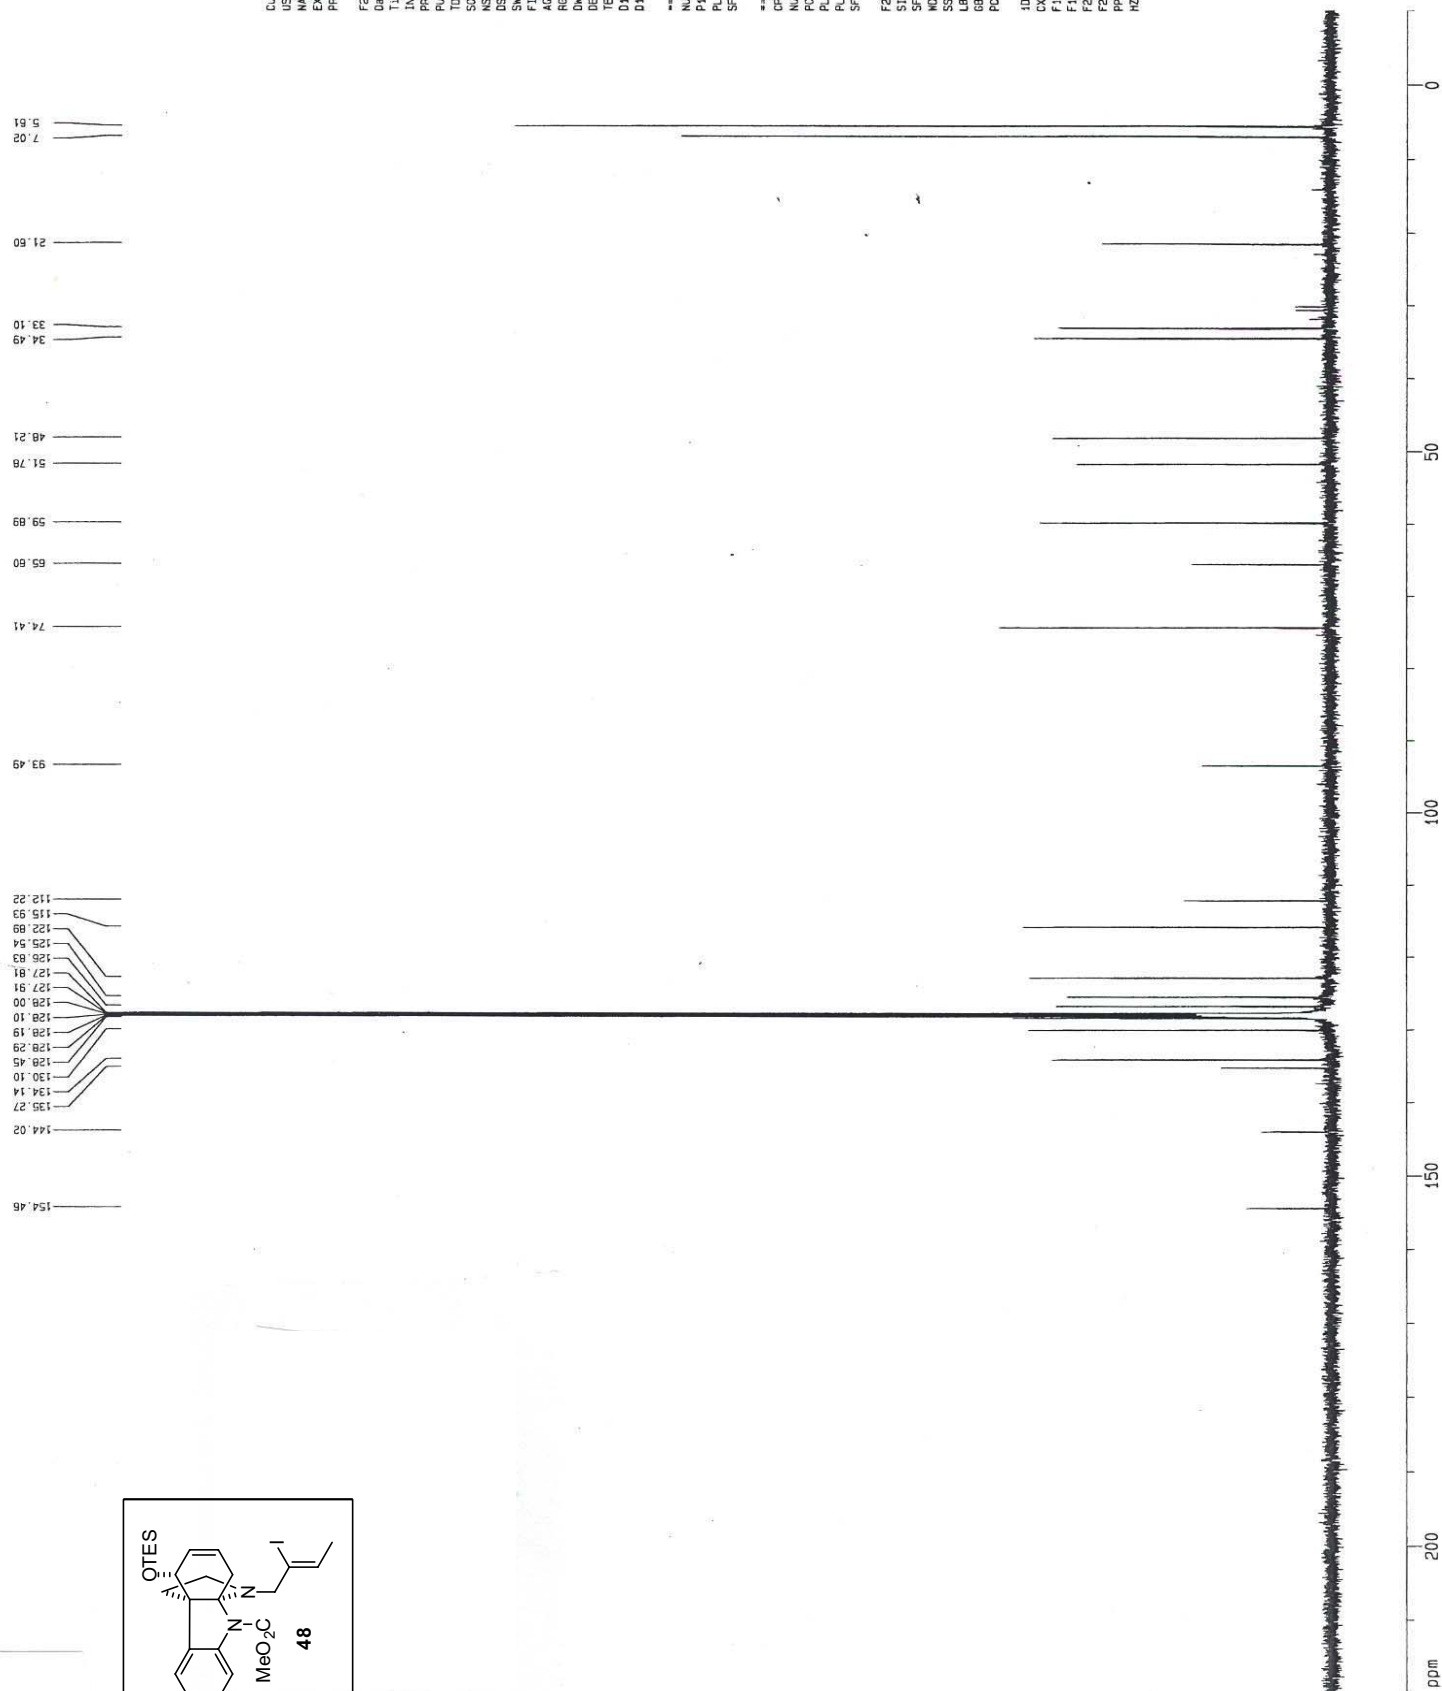



<sup>1</sup>H spectrum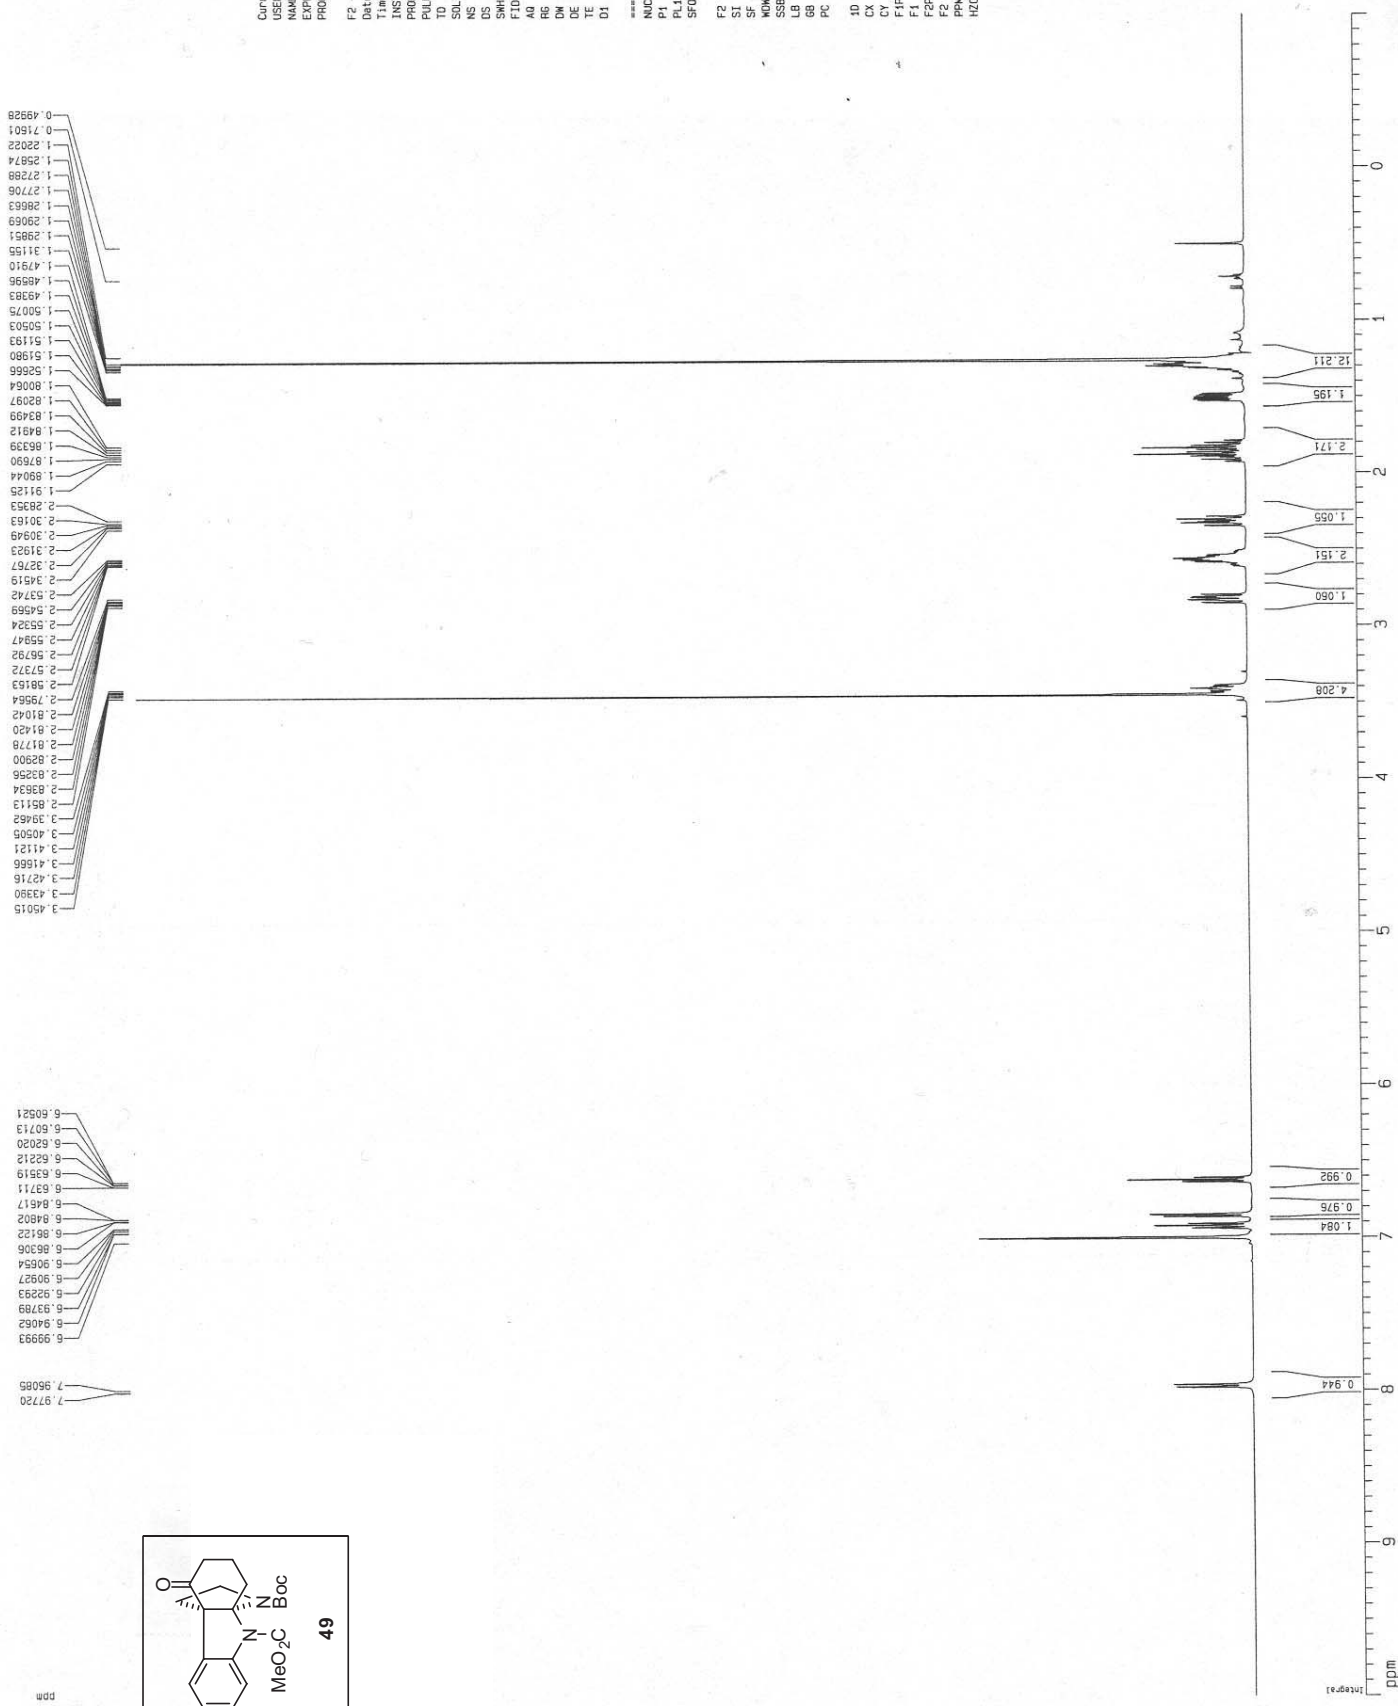

Current Data Parameters  
 USER aaronw  
 NAME abd-111-143  
 EXPNO 1  
 PROCNO 1

F2 - Acquisition Parameters  
 Date\_ 20080516  
 Time 12:30  
 INSTRUM spect  
 PROBHD 5 mm broadband  
 PULPROG zg30  
 TO 65536  
 SOLVENT CDCl<sub>3</sub>  
 NS 4  
 DS 2  
 SMH 6012.820 Hz  
 FIDRES 0.122266 Hz  
 AQ 4.0884866 sec  
 RG 90.5  
 DM 62.400 usec  
 DE 3.000 usec  
 TE 300.0 K  
 D1 0.1000000 sec

\*\*\*\*\* CHANNEL f1 \*\*\*\*\*  
 NUC1 <sup>1</sup>H  
 P1 12.00 usec  
 PL1 -3.00 dB  
 SF01 499.8334988 MHz

F2 - Processing parameters  
 SI 65536  
 SF 499.8334988 MHz  
 WDW EM  
 SSB 0  
 LB 0.30 Hz  
 GB 0  
 PC 4.00

1D NMR plot parameters  
 CX 22.80 cm  
 CY 43.32 cm  
 F1P 10.000 ppm  
 F1 499.830 Hz  
 F2P -1.000 ppm  
 F2 -499.83 Hz  
 PPM0 0.46846 ppm/cm  
 MZ0 241.14610 Hz/cm

13C spectrum with 1H decoupling

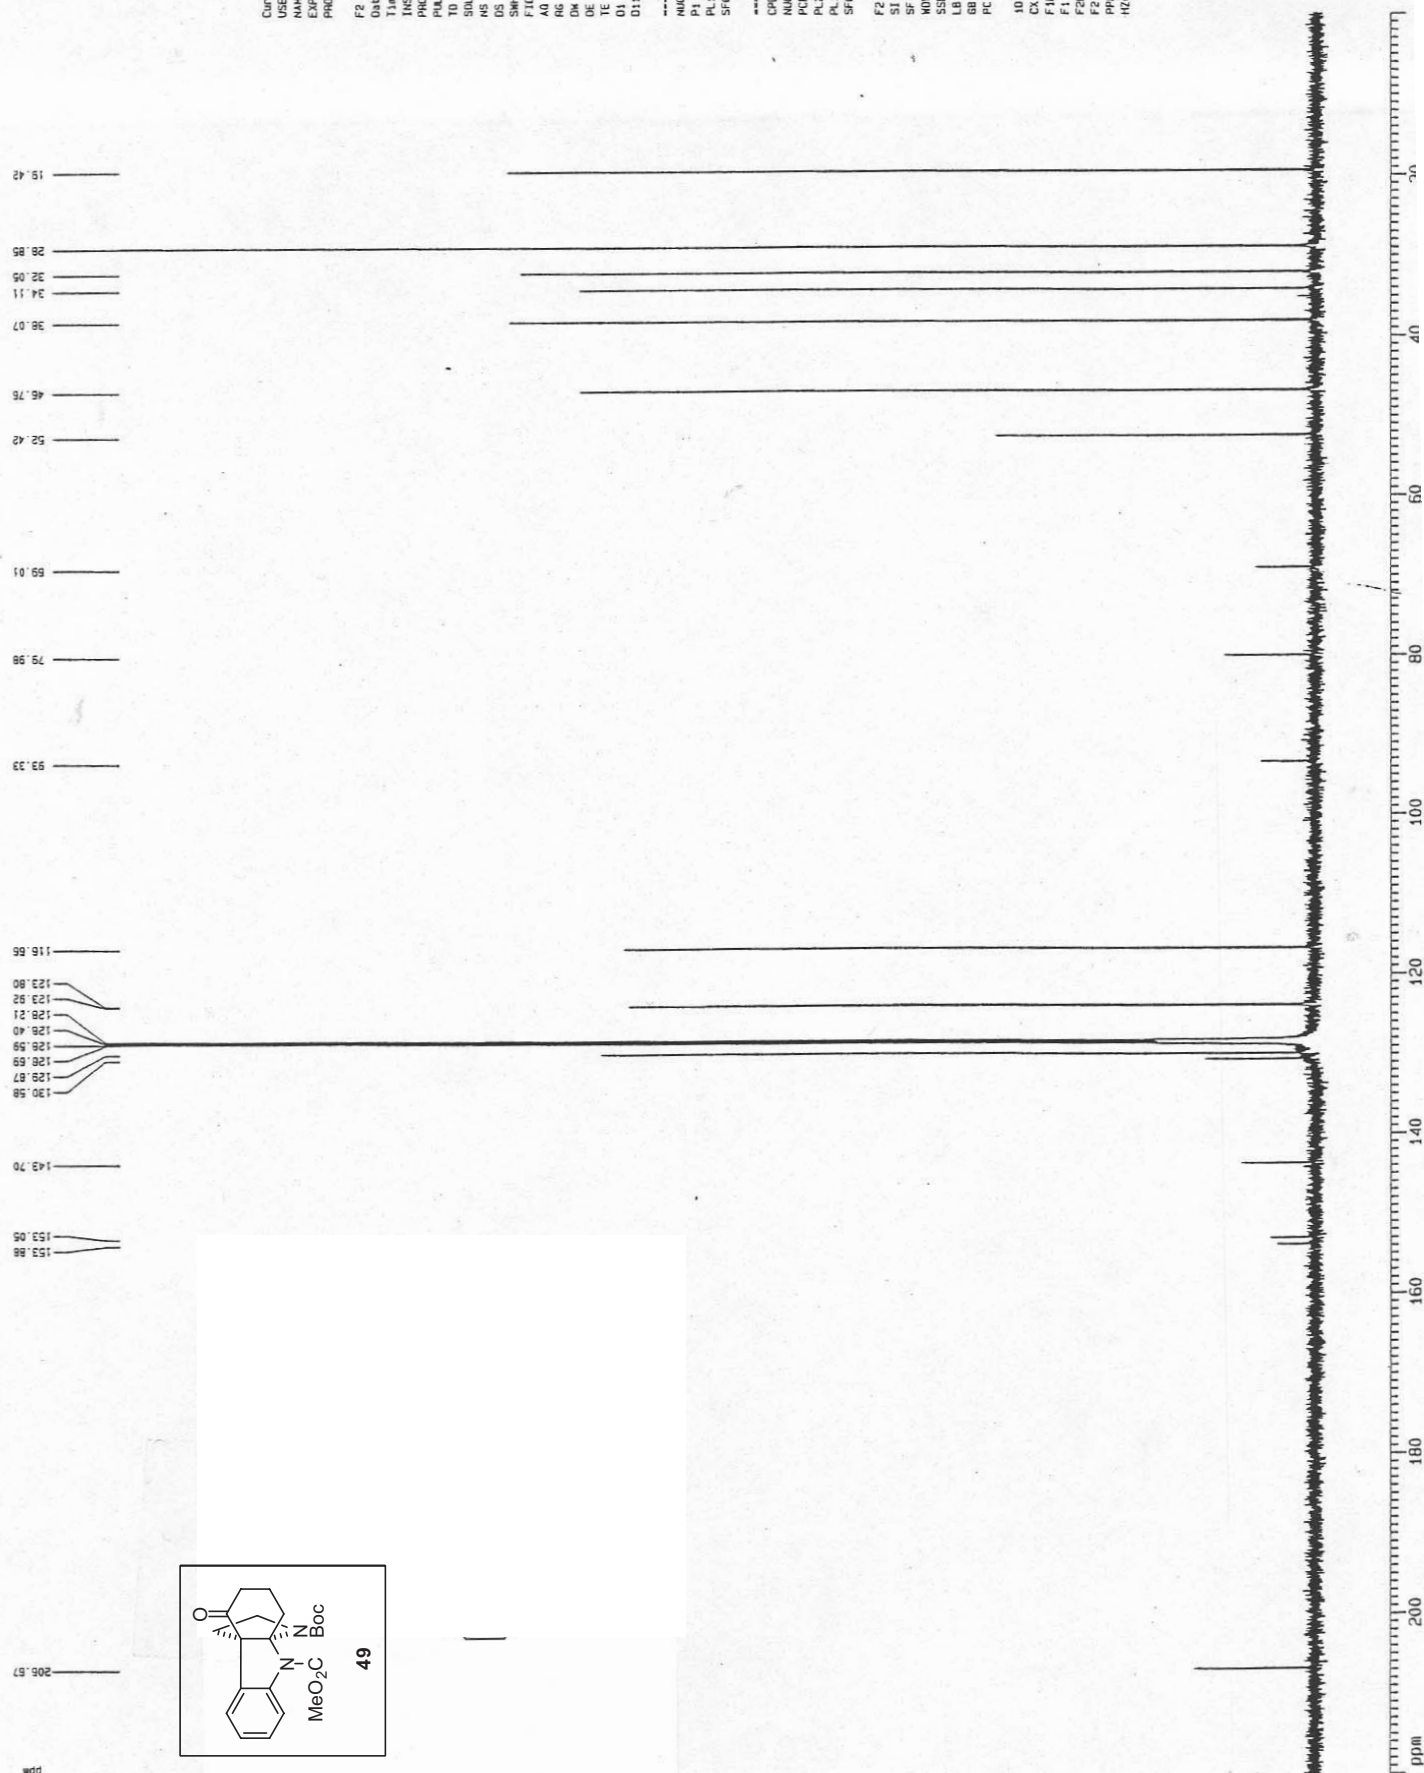

Current Data Parameters  
 USER dounay  
 NAME abd-11-143  
 EXPNO 2  
 PROCNO 1

F2 - Acquisition Parameters  
 Date\_ 20030530  
 Time 5:47  
 INSTRUM spect  
 PULPROG zgpg30  
 TO 65536  
 SOLVENT CDCl3  
 NS 735  
 DS 4  
 SWH 30303.031 Hz  
 FIDRES 0.462388 Hz  
 AQ 1.0013940 sec  
 RG 1280.2  
 DM 16.500 usec  
 DE 4.50 usec  
 TE 300.0 K  
 O1 0.25000000 sec  
 D11 0.03000000 sec

----- CHANNEL f1 -----  
 NUC1 13C  
 P1 15.00 usec  
 PL1 0.00 dB  
 SF01 125.0981791 MHz

----- CHANNEL f2 -----  
 CPMPRG2 waltz16  
 NUC2 1H  
 P2 10.00 usec  
 PL2 -3.00 dB  
 PL12 15.10 dB  
 SF02 499.8334988 MHz

F2 - Processing parameters  
 SI 65536  
 SF 125.6822507 MHz  
 EN 0  
 NDW 1.00 Hz  
 LB 0  
 GB 0  
 PC 2.00

10 MHz plot parameters  
 CX 22.80 cm  
 FIP 220.000 ppm  
 F1 27650.10 Hz  
 F2P 0.000 ppm  
 F3 1.00 Hz  
 FRQM 9.6403 Hz/cm  
 HZCN 1212.7351 Hz/cm

<sup>1</sup>H spectrum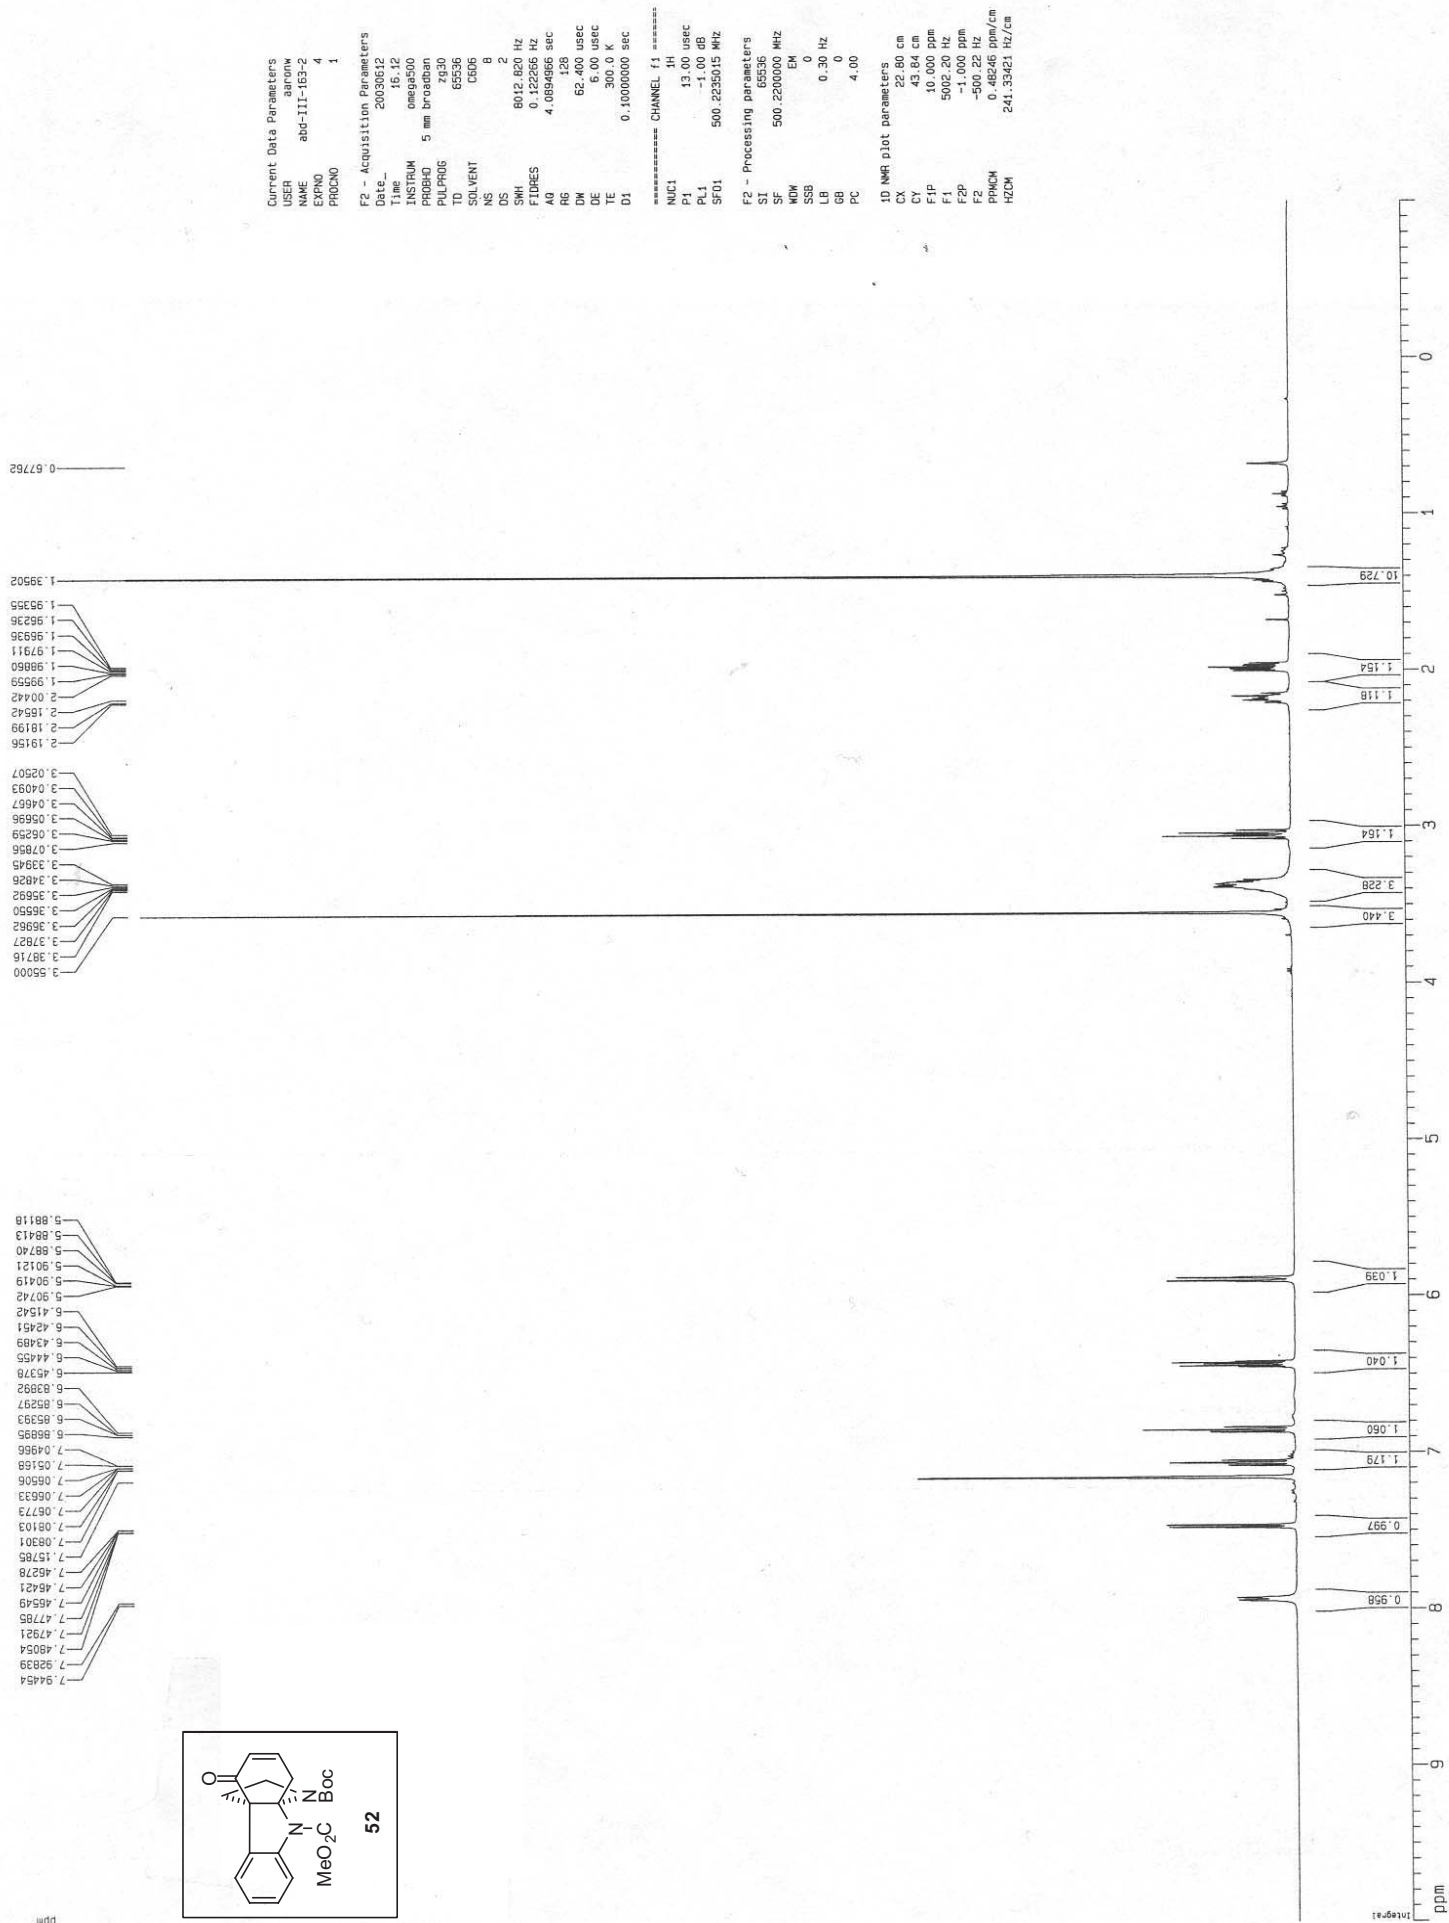



<sup>13</sup>C spectrum with <sup>1</sup>H decoupling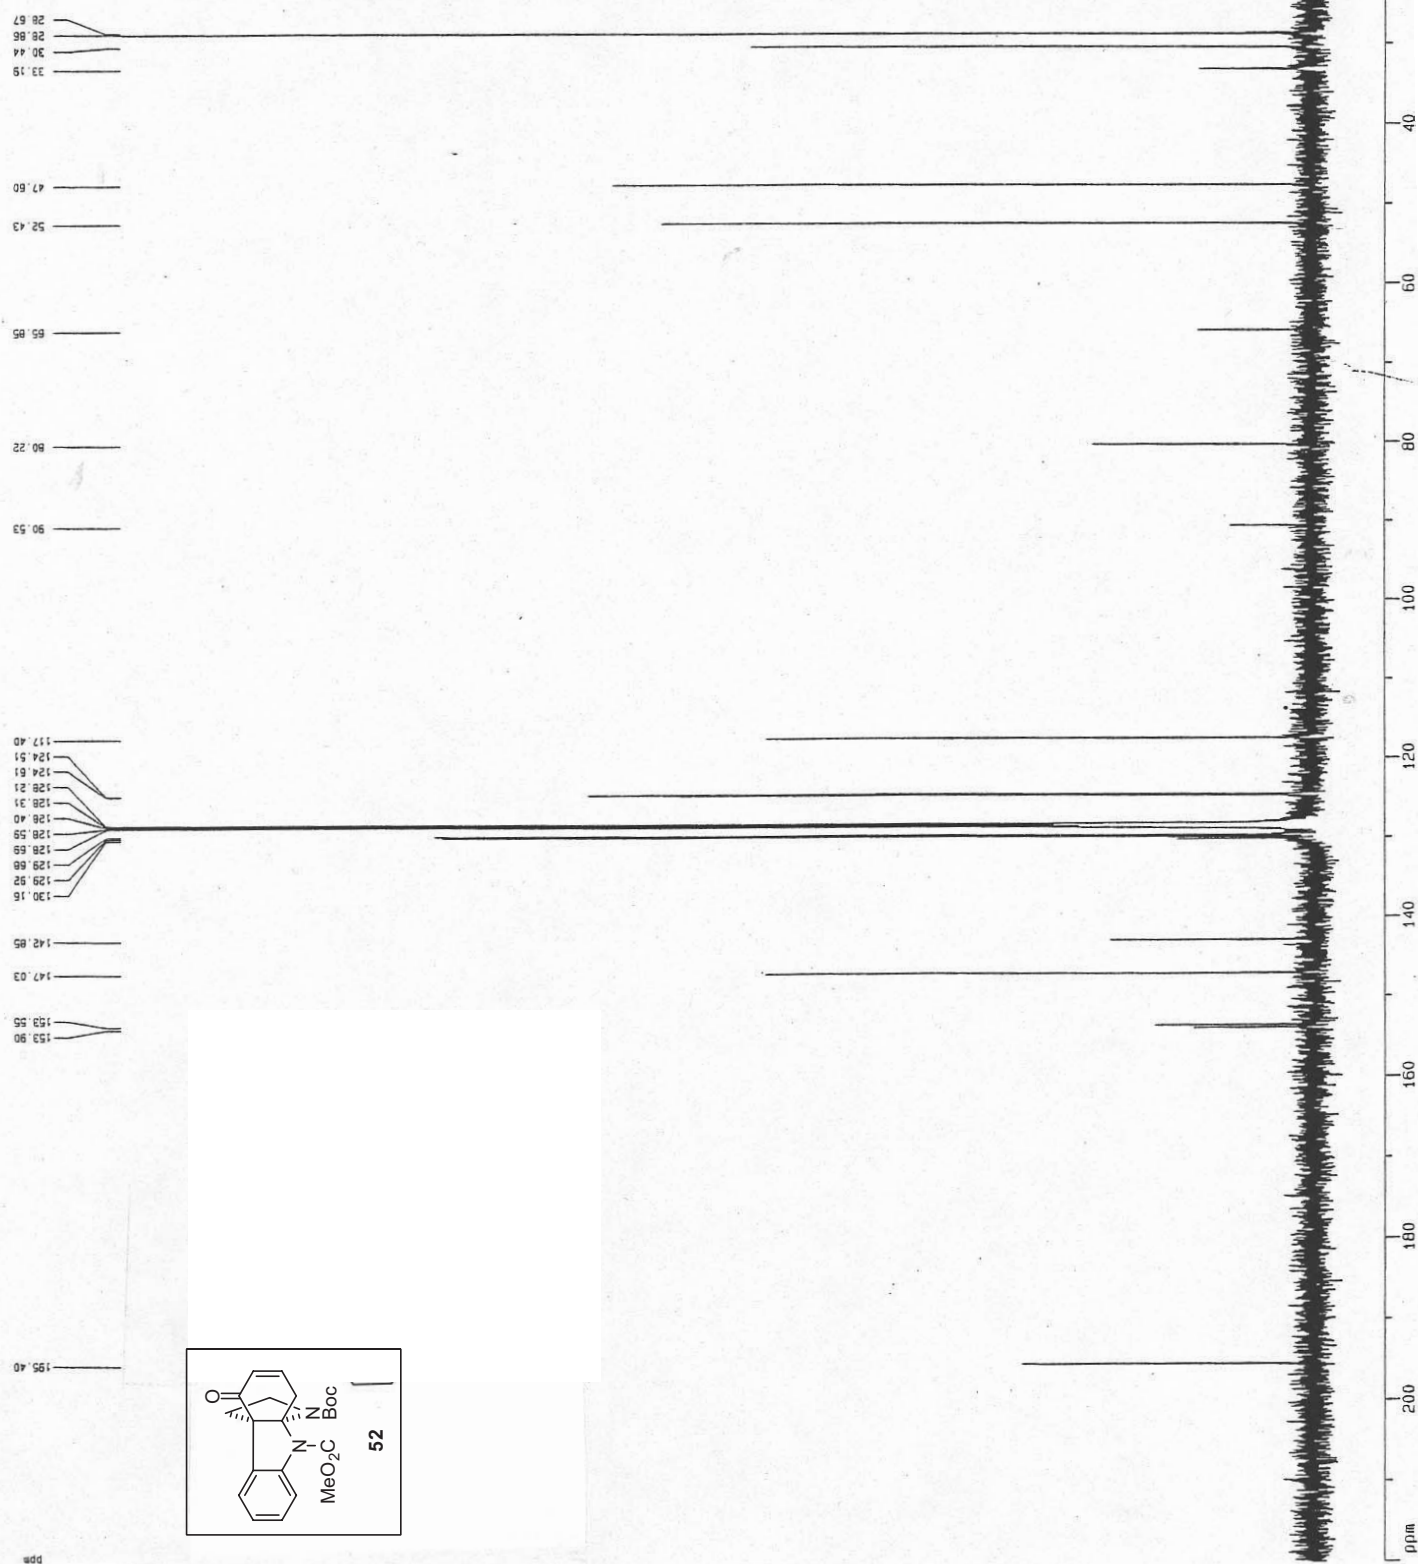

Current Data Parameters  
 USER dounay  
 NAME add-111-163-2  
 EXPNO 5  
 PROCNO 1

F2 - Acquisition Parameters  
 Date\_ 20030616  
 Time 11:19  
 INSTRUM spect  
 PROBHD 5 mm broadband  
 PULPROG zgpg30  
 TO 195536  
 SOLVENT CDCl3  
 NS 657  
 DS 4  
 SWH 30303.031 Hz  
 FIDRES 0.462388 Hz  
 AQ 1.0813940 sec  
 RG 5160.6  
 DW 16.500 usec  
 DE 4.50 usec  
 TE 300.0 K  
 D1 0.25000000 sec  
 D11 0.03000000 sec

===== CHANNEL f1 =====  
 NUC1 <sup>13</sup>C  
 P1 32.50 usec  
 PL1 -5.00 dB  
 SF01 125.7942048 MHz

===== CHANNEL f2 =====  
 CPDPRG2 waltz16  
 NUC2 <sup>1</sup>H  
 PCPD2 80.00 usec  
 PL2 -1.00 dB  
 PL12 14.40 dB  
 SF02 500.2230013 MHz

F2 - Processing parameters  
 SI 65536  
 SF 125.7803190 MHz  
 EN 0  
 MDW 0  
 SSB 0  
 LB 1.00 Hz  
 GB 0  
 PC 2.00

1D NMR plot parameters  
 CX 32.80 Ca  
 FIP 220.000 ppm  
 F1 27671.67 Hz  
 F2P 0.000 ppm  
 F2 0.00 Hz  
 PPMCN 9.64912 ppm/Ca  
 HZCN 1213.66980 Hz/Ca

1.57937  
1.98345  
1.99271  
1.99667  
2.00469  
2.00867  
2.01804  
2.02187  
2.35670  
2.40244  
2.41845  
2.42289  
2.42776  
2.44369  
2.52102  
2.52501  
2.53840  
2.54473  
2.55349  
2.59736  
2.61002  
2.61367  
2.73447

5.92675  
5.92907  
5.94423  
5.94719  
5.94950  
5.95243  
6.04178  
6.04779  
6.05289  
6.05896  
6.06456  
6.06743  
6.06953  
6.06244  
6.07556  
6.07752  
7.05982  
7.06158  
7.07533  
7.09014  
7.09281  
7.15811  
7.71499  
7.72368  
7.76670  
7.78886

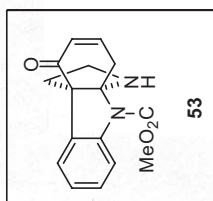

Current Data Parameters  
USER dounay  
NAME abd-[1]-166-2  
EXPNO 1  
PROCNO 1

F2 - Acquisition Parameters  
Date\_ 20030613  
Time 14.06  
INSTRUM spect  
PROBHD 5 mm Bruker  
PULPROG zgpg30  
TD 65536  
SOLVENT CDCl3  
NS 4  
DS 2  
SWH 8012.820 Hz  
FIDRES 0.122266 Hz  
AQ 4.0854965 sec  
RG 128  
DM 62.400 usec  
DE 6.00 usec  
TE 333.0 K  
D1 0.10000000 sec

\*\*\*\*\* CHANNEL f1 \*\*\*\*\*  
NUC1 1H  
P1 13.00 usec  
PL1 -1.00 dB  
SF01 500.2235015 MHz

F2 - Processing parameters  
SI 65536  
SF 500.2200000 MHz  
WDW EM  
SSB 0  
LB 0.30 Hz  
GB 0  
PC 4.00

10 NMR plot parameters  
CX 22.80 cm  
F1P 10.500 ppm  
F1 5252.31 Hz  
F2P -0.500 ppm  
F2 -250.11 Hz  
PPHCH 0.48246 ppm/cm  
HZCH 241.33421 Hz/cm

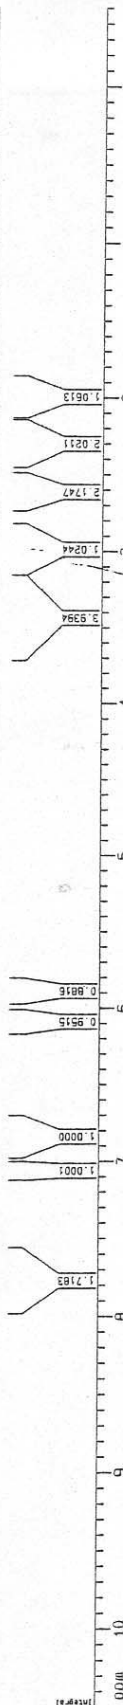

## 13C spectrum with 1H decoupling

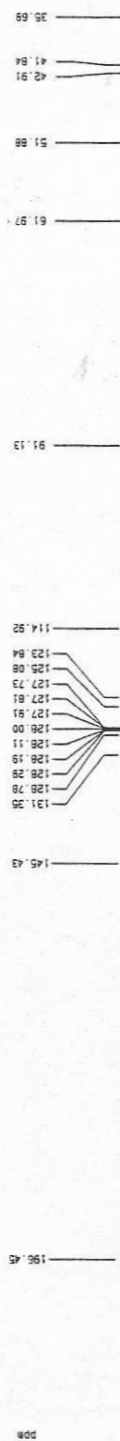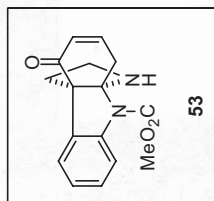

Current Data Parameters  
 USER dounay  
 NAME abd-111-166X  
 EXPNO 3  
 PROCNO 1

F2 - Acquisition Parameters  
 Date\_ 20030614  
 Time 15.31  
 INSTRUM 90500  
 PULPROG 5 um broadband  
 TO 65536  
 SOLVENT CDCl3  
 DS 2555  
 SWH 30303.031 Hz  
 FIDRES 0.462388 Hz  
 AQ 1.0013940 sec  
 RG 1290.2  
 DM 16.500 usec  
 DE 4.50 usec  
 TE 333.0 K  
 D1 1.00000000 sec  
 D11 0.03000000 sec

===== CHANNEL f1 =====  
 NUC1 13C  
 P1 15.00 usec  
 PL1 0.00 dB  
 SF01 125.696791 MHz

===== CHANNEL f2 =====  
 CPMPRG2 waltz16  
 NUC2 1H  
 P2 80.00 usec  
 PL2 -3.00 dB  
 PL12 15.10 dB  
 SF02 499.833498 MHz

F2 - Processing parameters  
 SI 65536  
 SF 125.6823015 MHz  
 EN EN  
 MD 0  
 LB 1.00 Hz  
 GB 0  
 PC 2.00

1D NMR plot parameters  
 CA 22.80 cm  
 FIP 220.000 ppm  
 F1 27850.11 Hz  
 F2 0.000 ppm  
 F2 0.00 Hz  
 PPMAX 9.84912 ppm/cm  
 NUCN 1312.72400 Hz/cm

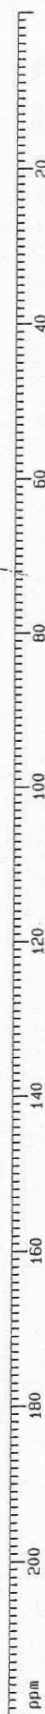



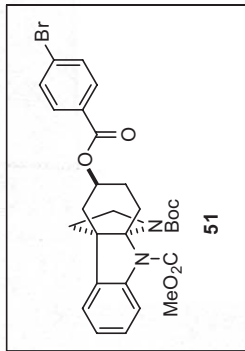

<sup>13</sup>C spectrum with <sup>1</sup>H decoupling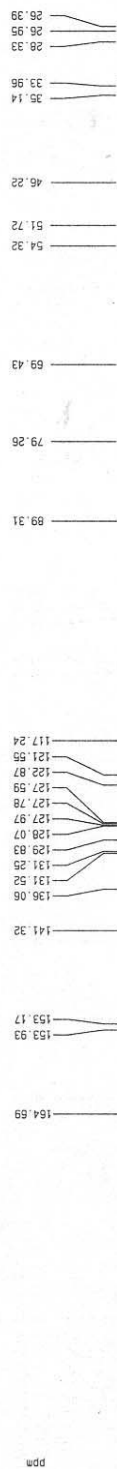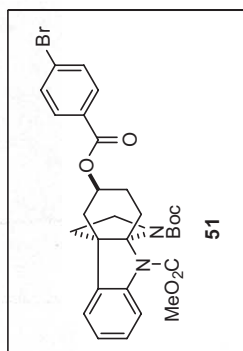

Current Data Parameters  
 USER admin  
 NAME adv-III-045-1  
 EXPNO 2  
 PROCNO 1

F2 - Acquisition Parameters  
 Date\_ 20051221  
 Time 10.53  
 INSTRUM gn500  
 PROBHD 5 mm broadband  
 PULPROG zgpg30  
 TD 65536  
 SOLVENT CDCl3  
 NS 2149  
 DS 4  
 SWH 30303.031 Hz  
 FIDRES 0.462388 Hz  
 AQ 1.0814105 sec  
 RG 4096  
 DM 16.500 usec  
 DE 4.50 usec  
 TE 333.0 K  
 D1 0.25000000 sec  
 d11 0.03000000 sec  
 MCREST 0.00000000 sec  
 MCORR 0.01500000 sec

===== CHANNEL f1 =====  
 NUC1 <sup>13</sup>C  
 P1 7.00 usec  
 PL1 0.00 dB  
 SF01 125.7485389 MHz

===== CHANNEL f2 =====  
 CPOPRG2 waltz16  
 NUC2 <sup>1</sup>H  
 PPD2 80.00 usec  
 PL2 -3.00 dB  
 PL12 15.00 dB  
 SF02 500.0425002 MHz

F2 - Processing parameters  
 SI 65536  
 SF 125.7351350 MHz  
 KW EM  
 SSB 0  
 LB 1.00 Hz  
 GB 0  
 PC 2.00

10 NMR plot parameters  
 CX 22.80 cm  
 CY 98.43 cm  
 F1P 210.000 ppm  
 F1 26404.38 Hz  
 F2P -1237.35 Hz  
 F2 -1237.35 Hz  
 PRACH 9.64812 ppm/cm  
 HZCM 1213.23389 Hz/cm

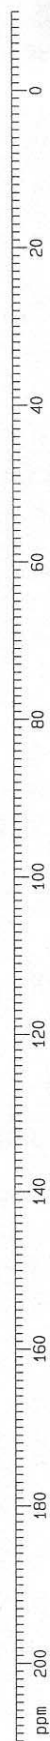



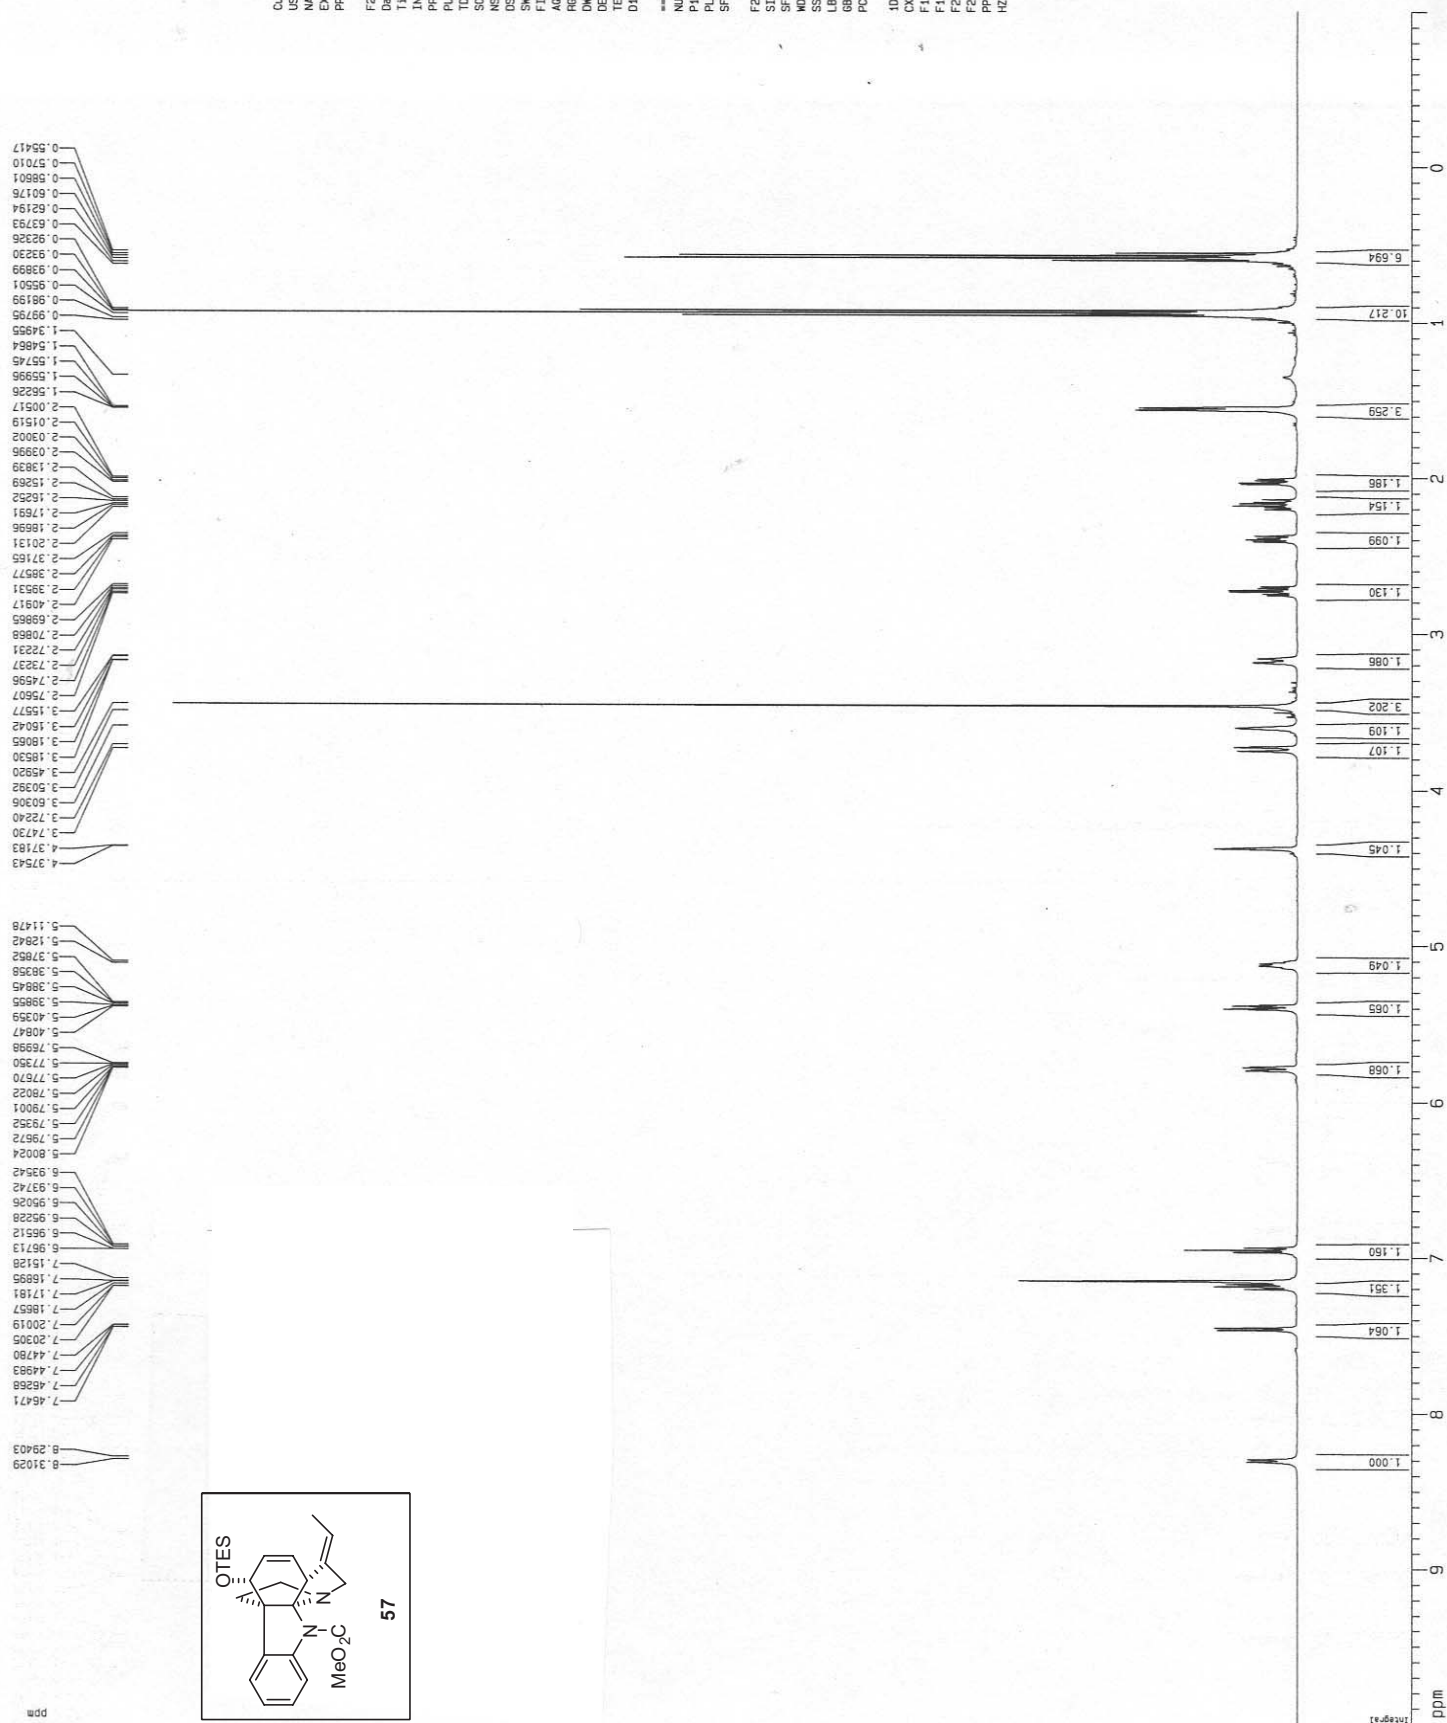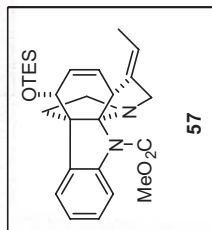

## 13C spectrum with 1H decoupling

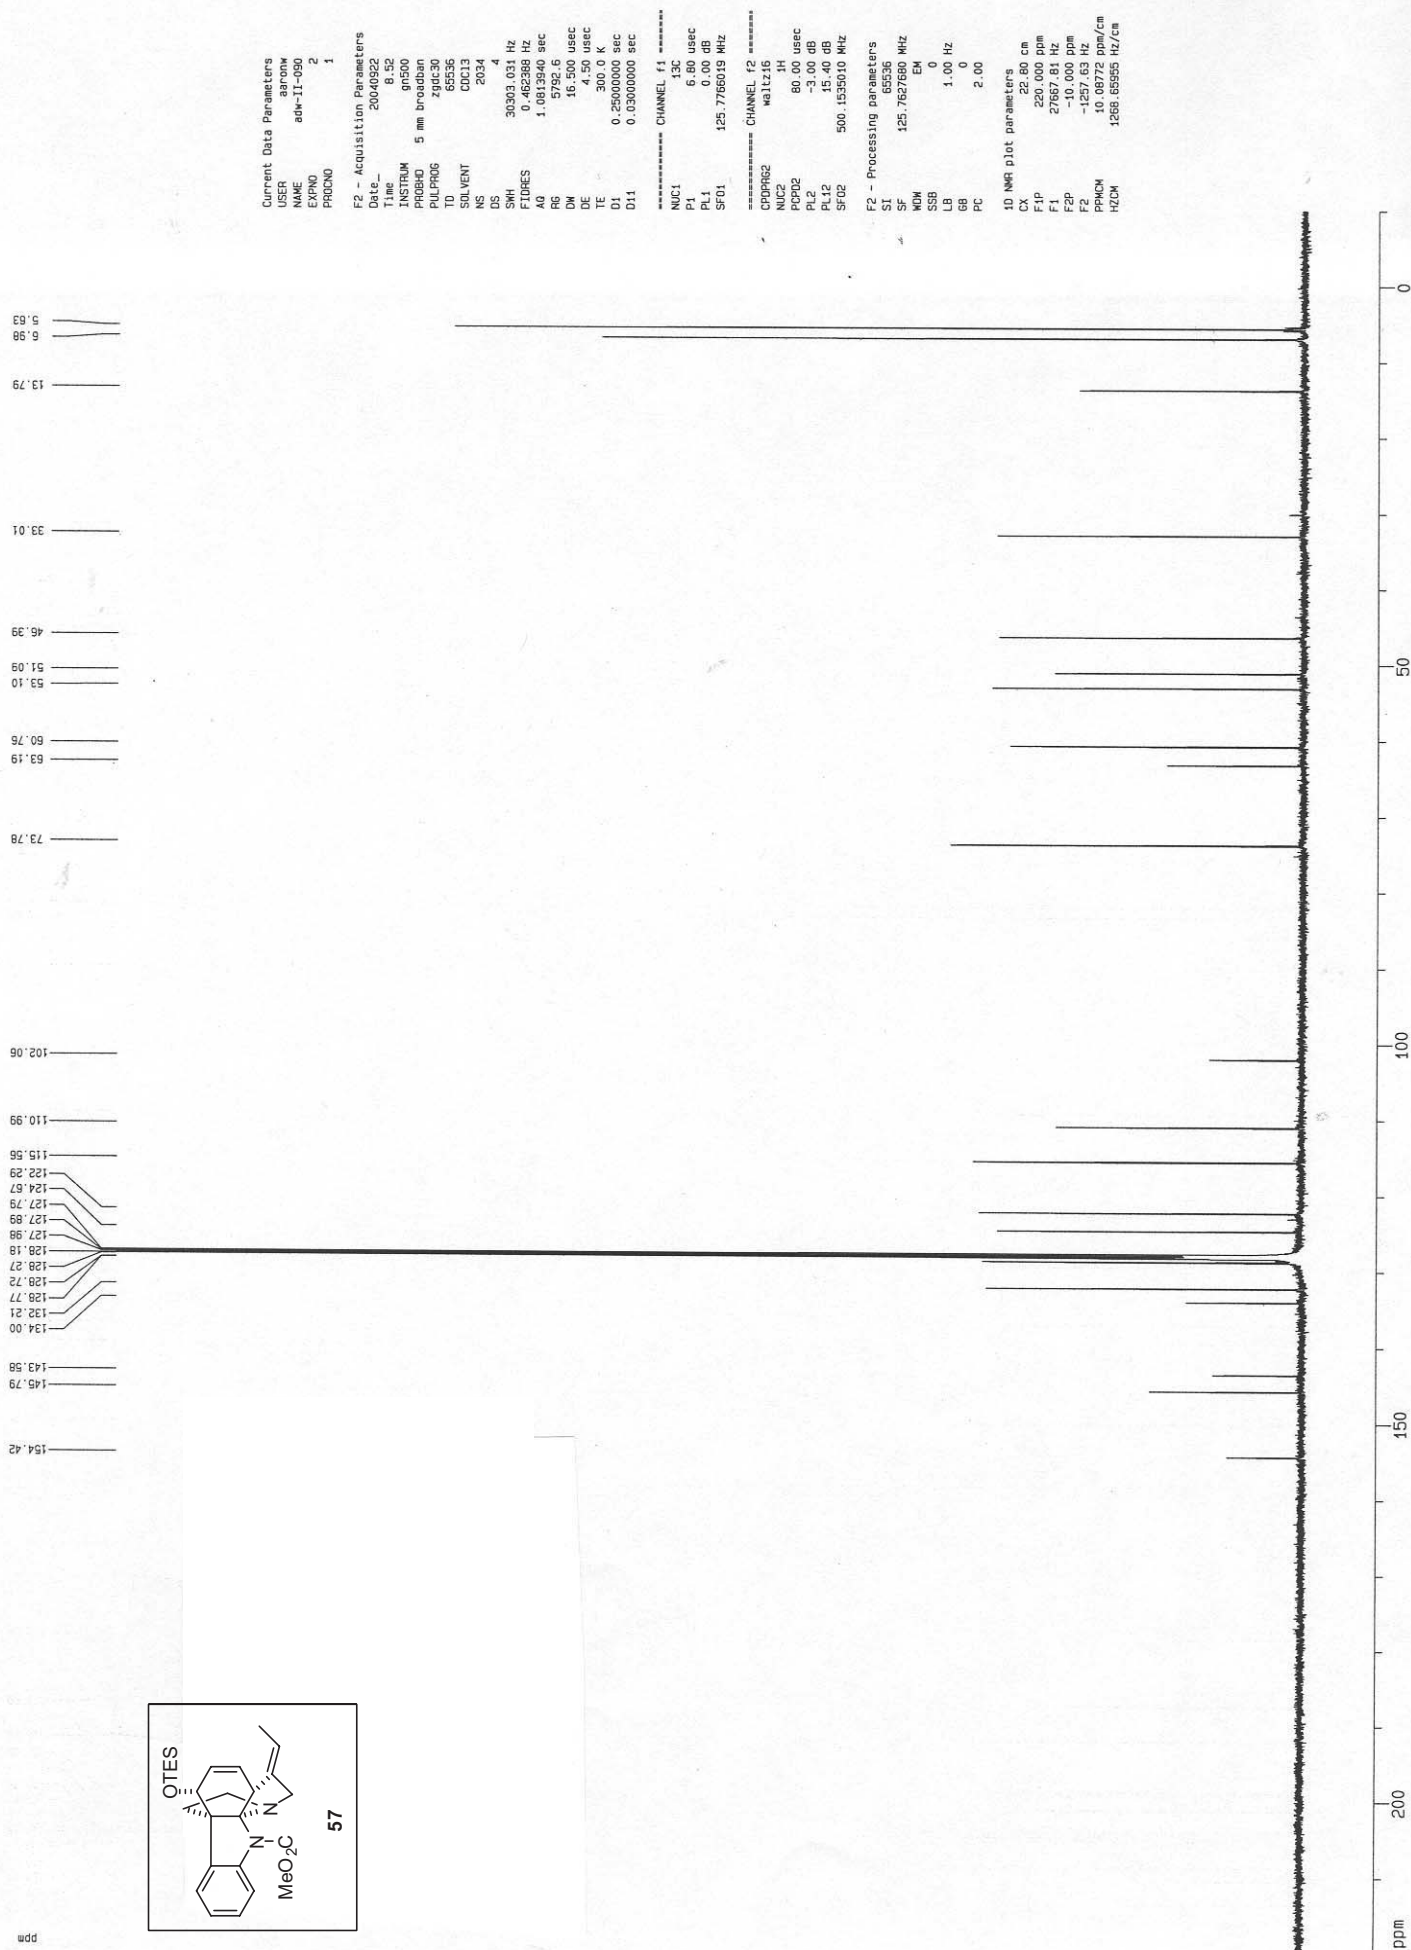

<sup>1</sup>H spectrum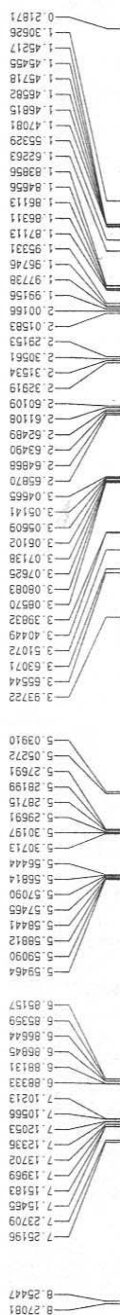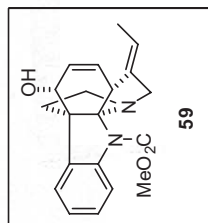

Current Data Parameters  
 USER aschm  
 NAME 80w-11-058-4  
 EXPNO 1  
 PROCNO 1

F2 - Acquisition Parameters  
 Date\_ 20060120  
 Time 13.37  
 INSTRUM gn500  
 PROBHD 5 mm broadband  
 PULPROG zgpg30  
 TO 84728  
 SOLVENT CDCl3  
 NS 16  
 DS 2  
 SH1 B012.620 Hz  
 FIDRES 0.090043 Hz  
 AQ 5.0993398 sec  
 RG 287.4  
 DM 62.400 usec  
 DE 3.00 usec  
 TE 300.2 K  
 D1 0.1000000 sec  
 MCREST 0.0000000 sec  
 MCMRK 0.0150000 sec

===== CHANNEL f1 =====  
 NUC1 1H  
 P1 11.50 usec  
 PL1 -3.00 dB  
 SF01 500.045003 MHz

F2 - Processing parameters  
 SI 65536  
 SF 500.0400270 MHz  
 WDW EM  
 SSB 0  
 LB 0.30 Hz  
 GB 0  
 PC 4.00

1D NMR plot parameters  
 CX 22.60 cm  
 CY 22.60 cm  
 FIP 10.000 cm  
 F1 5000.40 Hz  
 F2 -1.000 ppm  
 F2 0.48246 ppm/cm  
 PPMCM 241.24735 Hz/cm

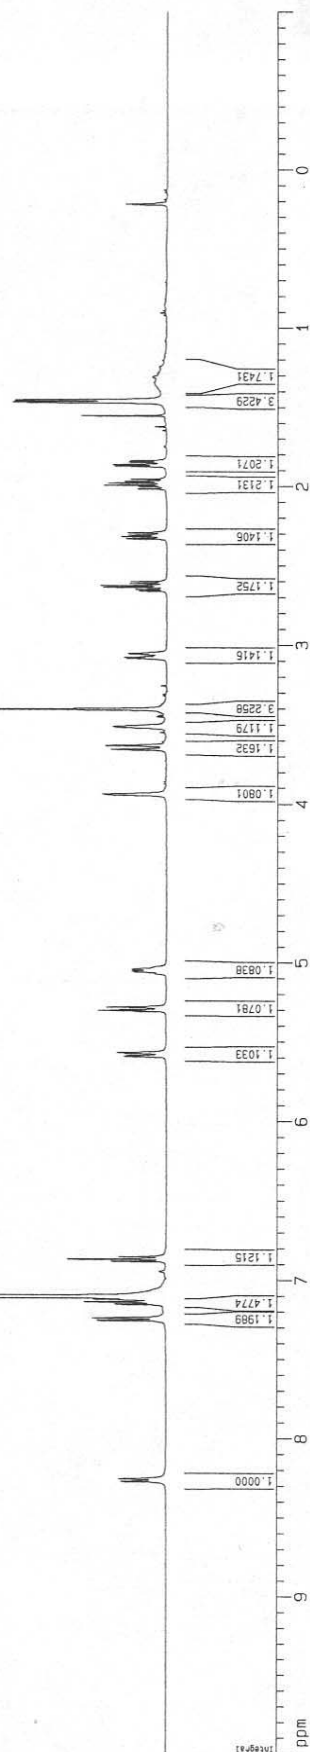

<sup>13</sup>C spectrum with <sup>1</sup>H decoupling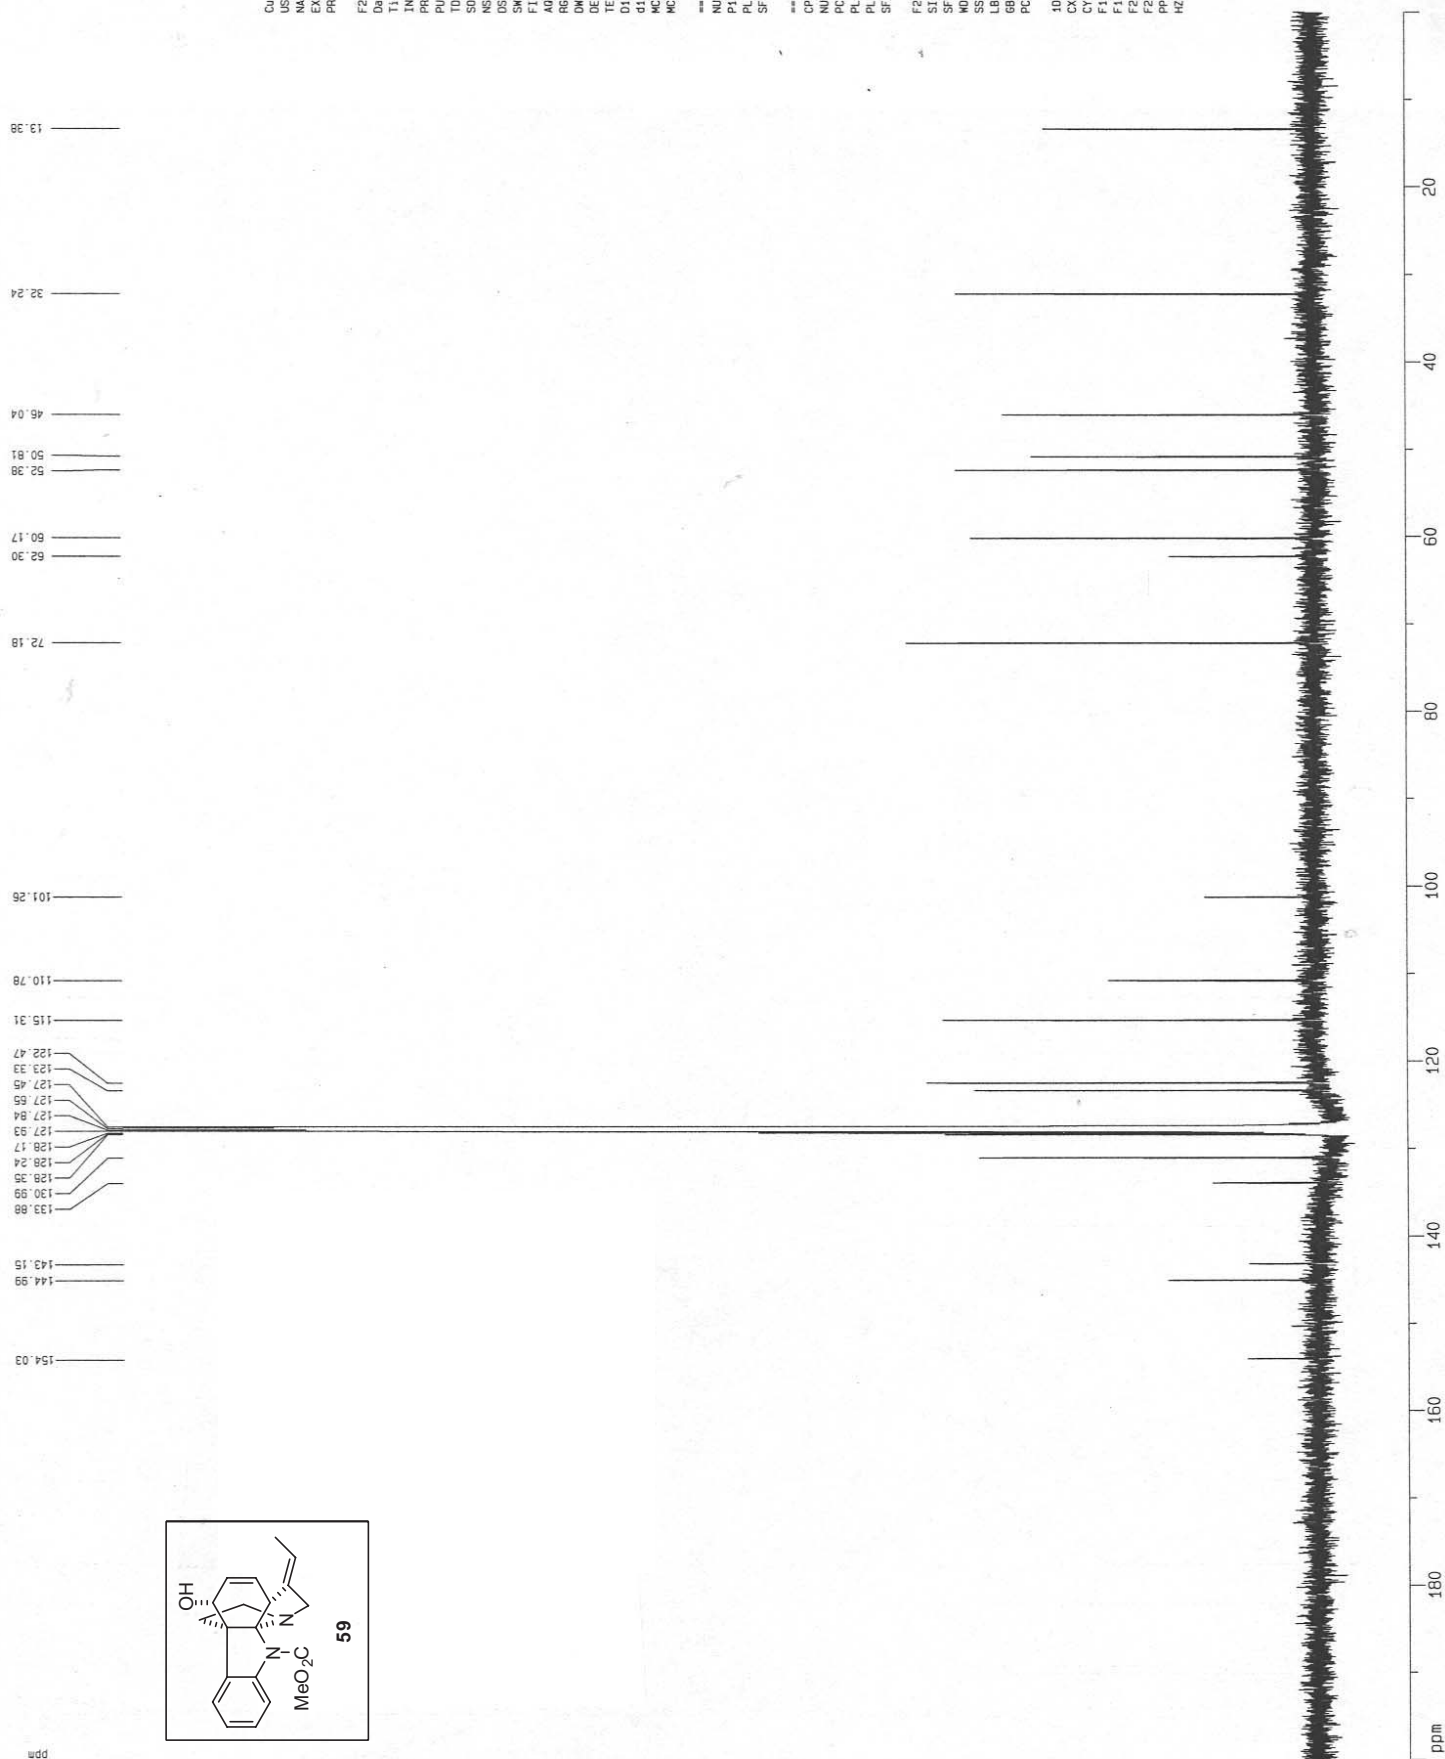



<sup>1</sup>H spectrum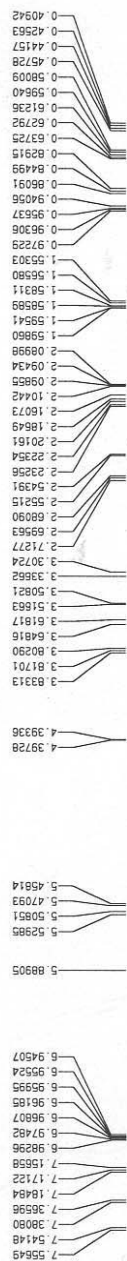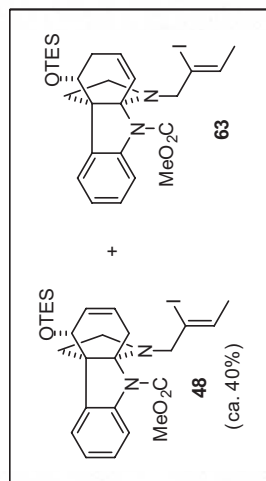

Current Data Parameters  
 USER anonw  
 NAME adw-11-095  
 EXPNO 1  
 PROCNO 1

F2 - Acquisition Parameters  
 Date\_ 20040924  
 Time 9.11  
 INSTRUM omegaf500  
 PROBHD 5 mm broadband  
 PULPROG zg30  
 TD 61728  
 SOLVENT CDCl<sub>3</sub>  
 NS 16  
 DS 2  
 SWH 8012.820 Hz  
 FIDRES 0.096821 Hz  
 AQ 4.000000 sec  
 RG 5.059071 Hz  
 B0 62.400 usec  
 DE 6.00 usec  
 TE 300.0 K  
 D1 0.1000000 sec

\*\*\*\*\* CHANNEL f1 \*\*\*\*\*  
 NUC1 1H  
 P1 13.00 usec  
 PL1 -1.00 dB  
 SF01 500.2235015 MHz

F2 - Processing parameters  
 SI 65536  
 SF 500.2200000 MHz  
 WDW EM  
 SSB 0  
 LB 0.30 Hz  
 GB 0  
 PC 4.00

1D NMR plot parameters  
 CX 22.80 cm  
 F1P 10.000 ppm  
 F1 5002.20 Hz  
 F2P -1.000 ppm  
 F2 -500.22 Hz  
 PPMCH 0.46546 ppm/cm  
 HZCM 241.33421 Hz/cm

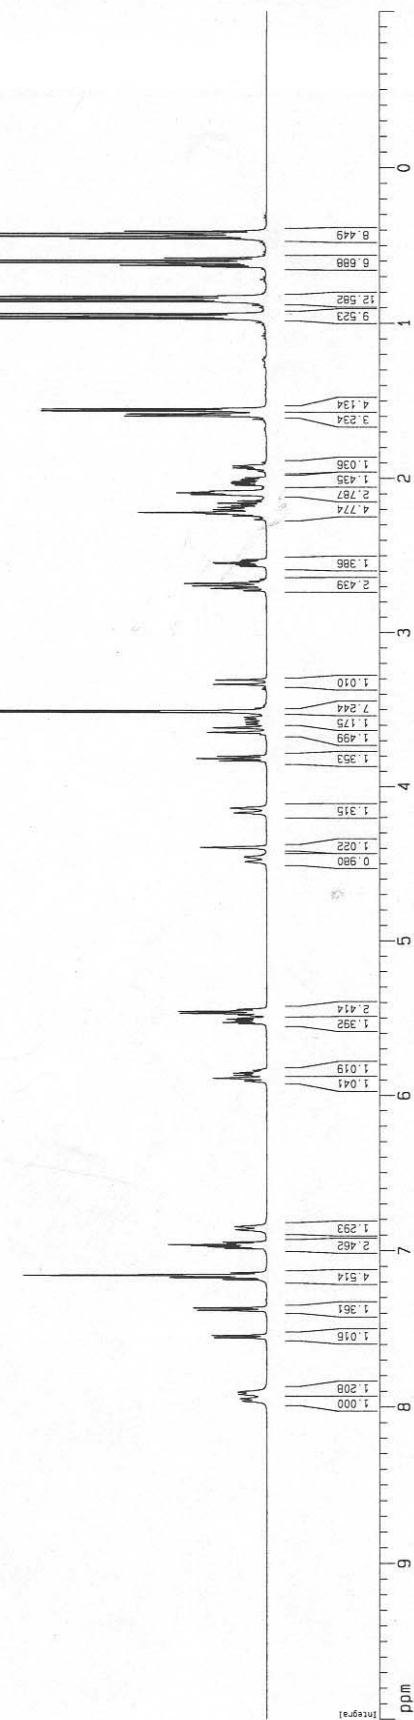

<sup>13</sup>C spectrum with <sup>1</sup>H decoupling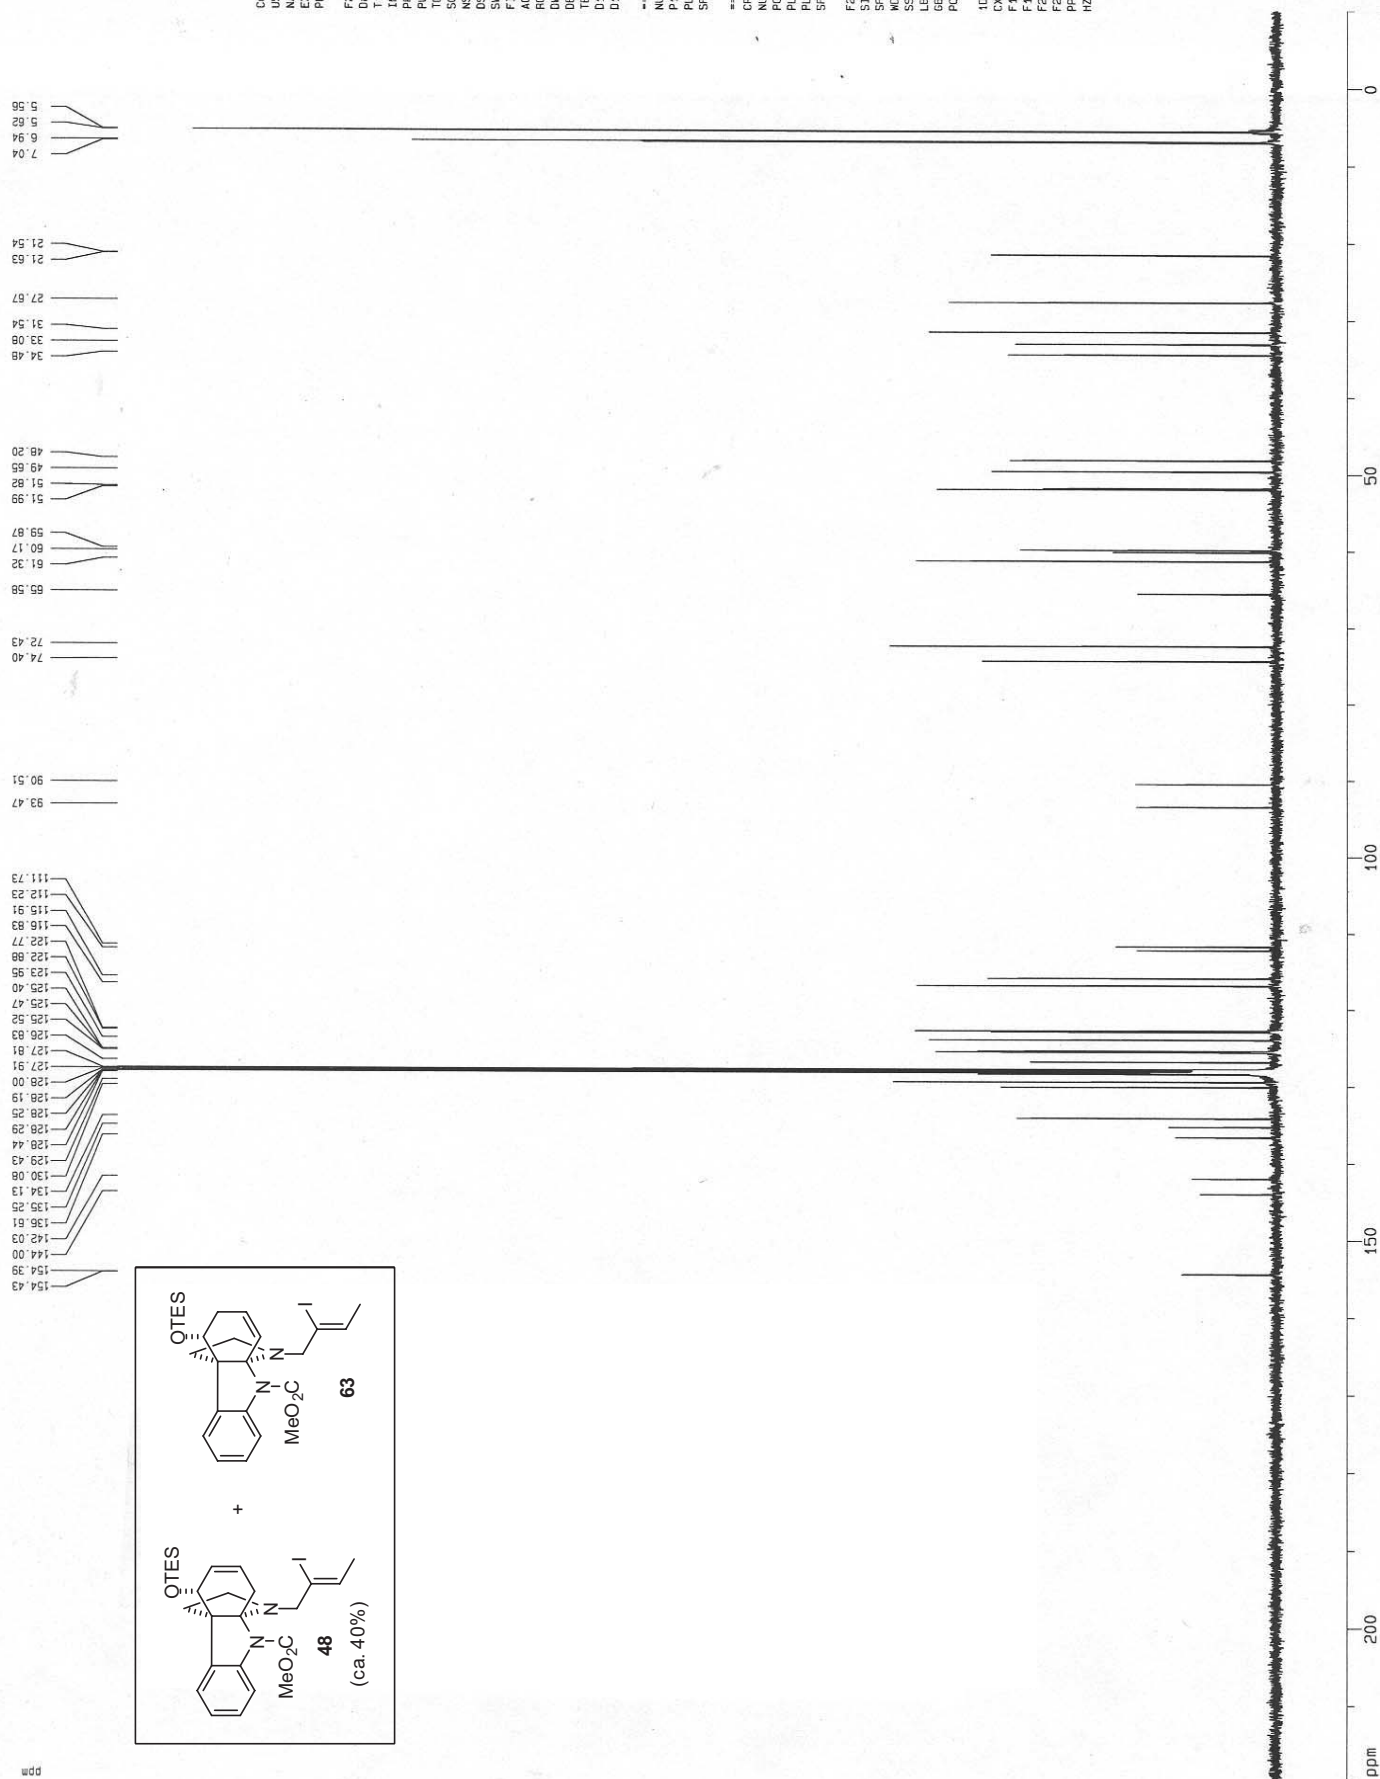

<sup>1</sup>H spectrum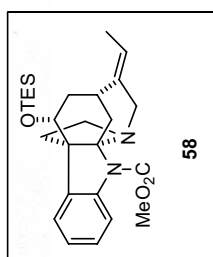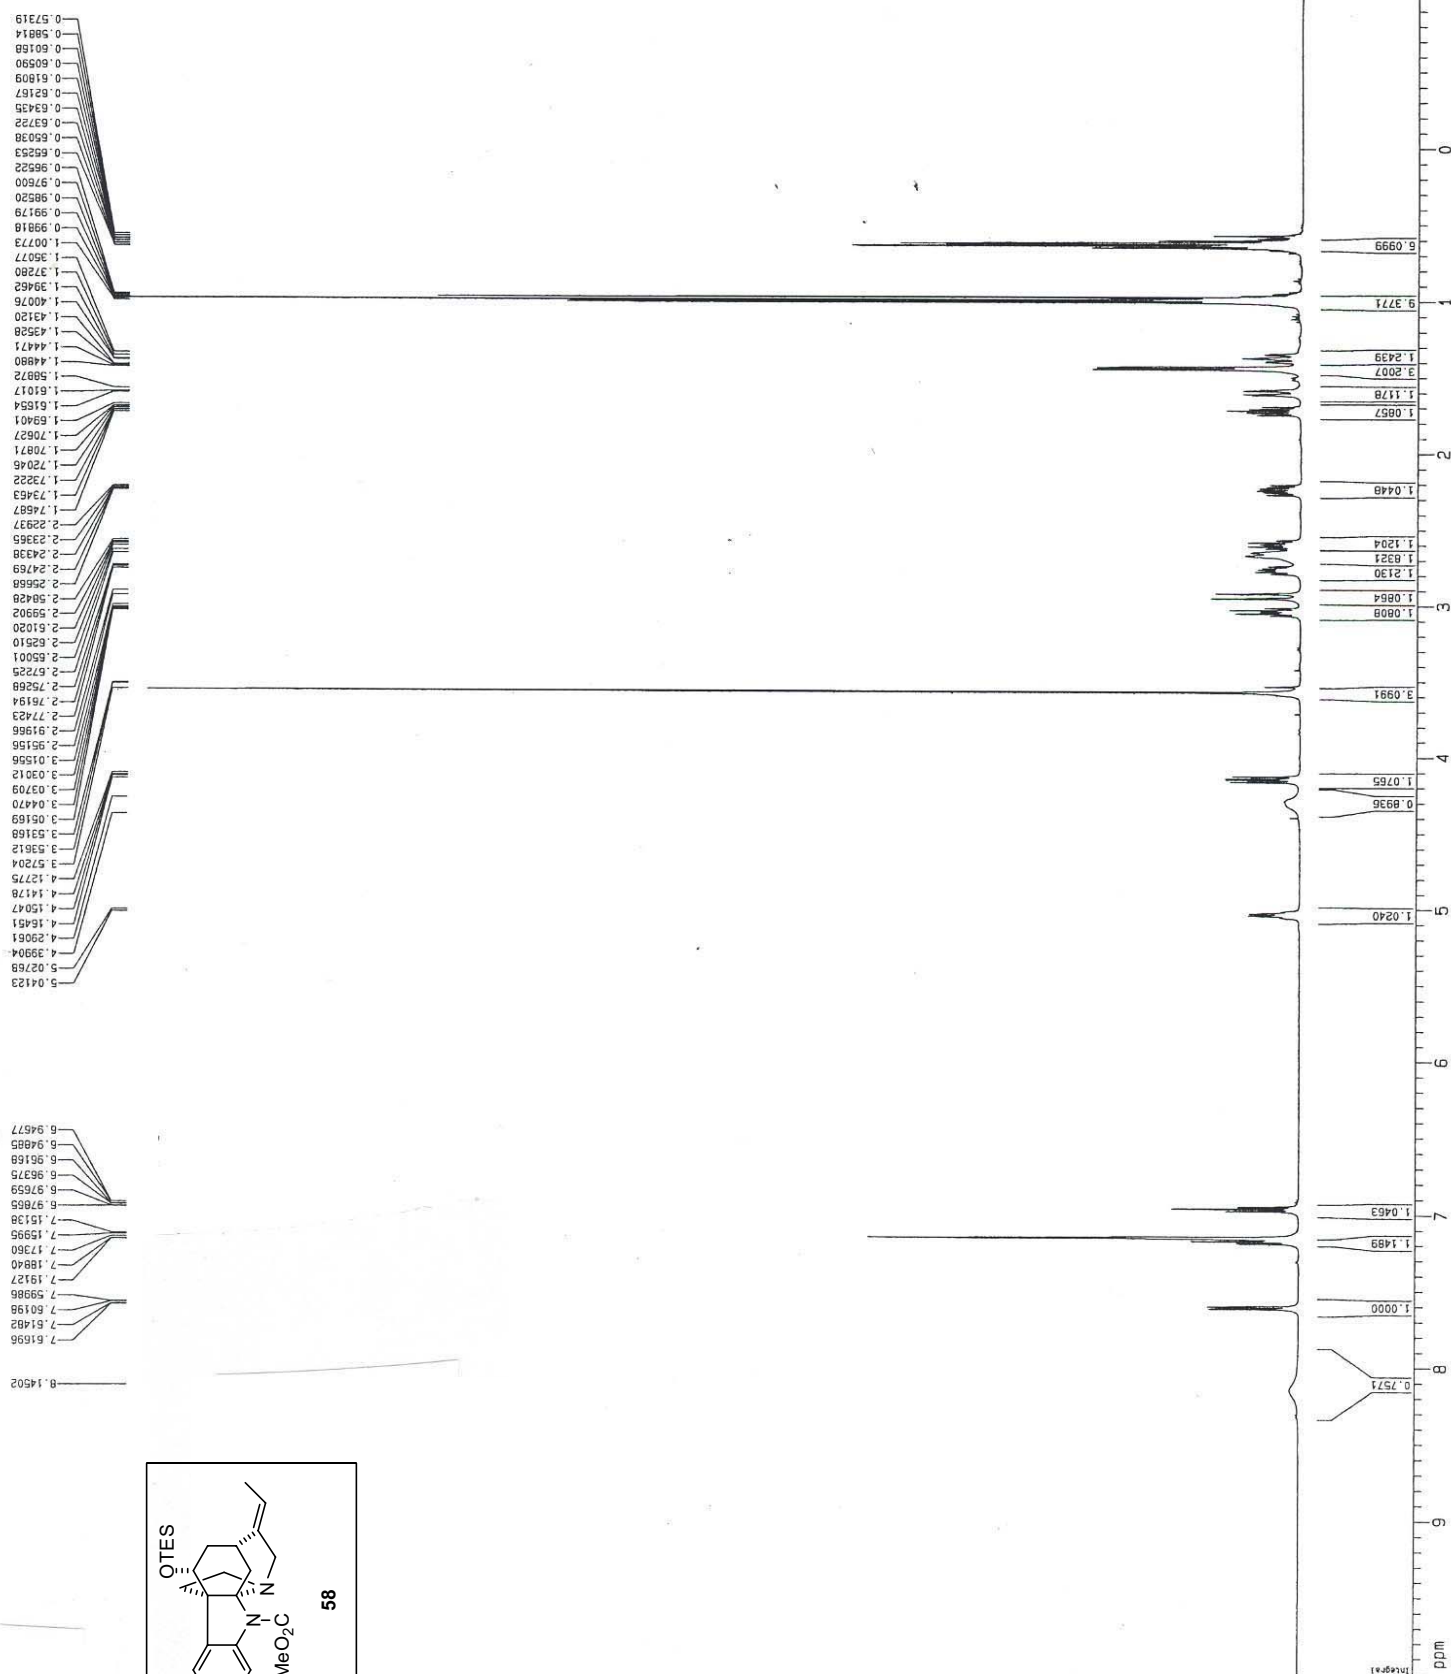

Current Data Parameters  
 USER admin  
 NAME adm-11-102  
 EXPNO 1  
 PROCNO 1

F2 - Acquisition Parameters  
 Date\_ 20040529  
 Time 17.09  
 INSTRUM 90500  
 PROBHD 5 mm broadband  
 PULPROG zgpg30  
 TO 9330  
 SOLVENT CDCl3  
 NS 16  
 DS 2  
 SWH 8012.820 Hz  
 FIDRES 0.098043 Hz  
 AQ 5.0988774 sec  
 RG 90.5  
 DM 62.400 usec  
 DE 6.00 usec  
 TE 300.0 K  
 D1 0.10000000 sec

===== CHANNEL f1 =====  
 NUC1 1H  
 P1 11.50 usec  
 PL1 -3.00 dB  
 SF01 500.1355010 MHz

F2 - Processing parameters  
 SI 65536  
 SF 500.1500000 MHz  
 WDW EN  
 SSB 0  
 LB 0.30 Hz  
 GB 0  
 PC 4.00

1D NMR plot parameters  
 CX 22.50 cm  
 FIP 10.000 ppm  
 F1 5001.50 Hz  
 F2P -1.000 ppm  
 F2 -500.15 Hz  
 PPMCM 0.48246 ppm/cm  
 HZCM 241.30045 Hz/cm

<sup>13</sup>C spectrum with <sup>1</sup>H decoupling

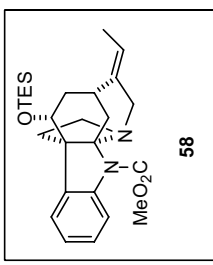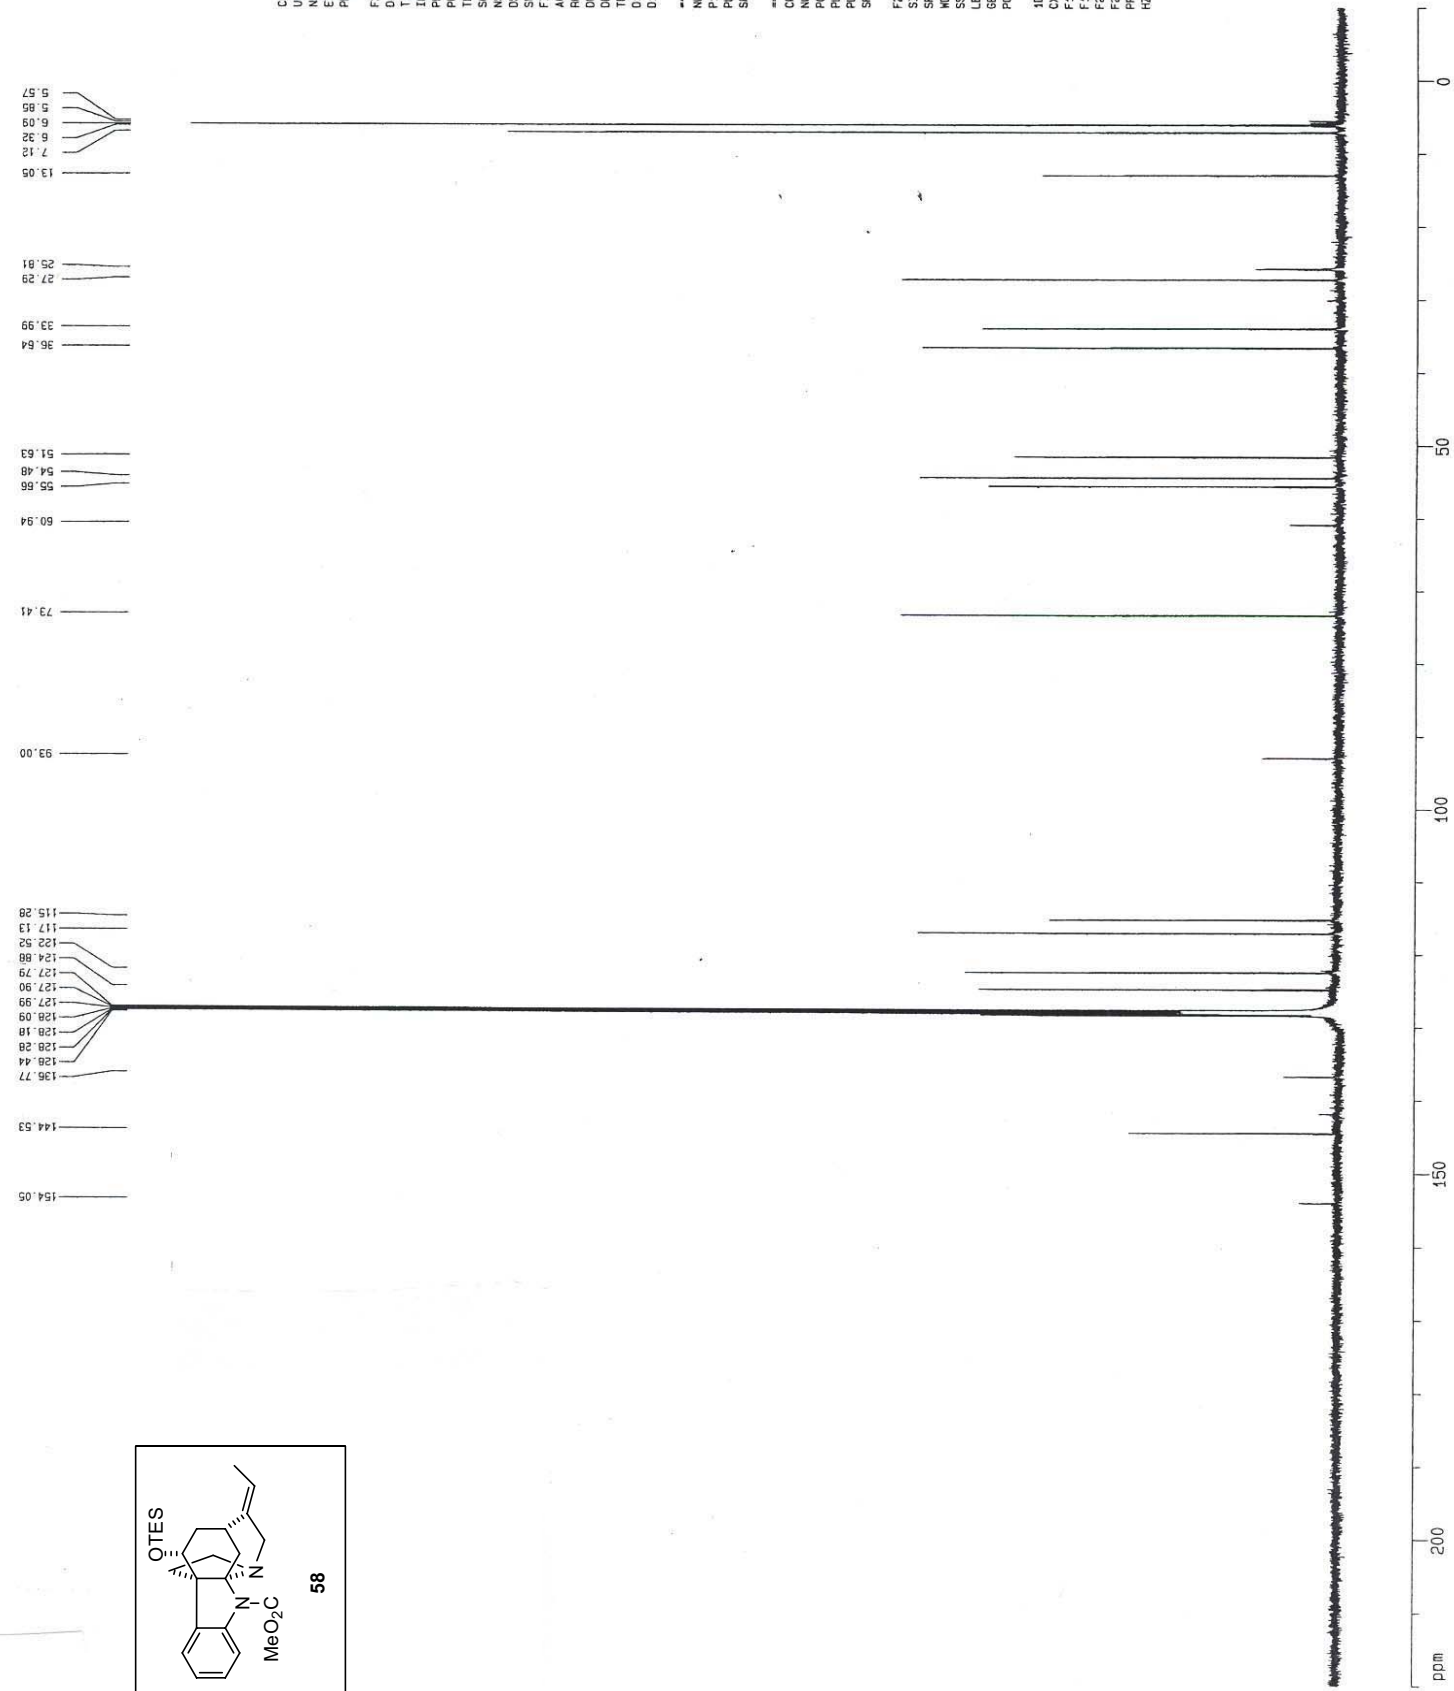

Current Data Parameters  
 USER anonm  
 NAME adm-11-102  
 EXPNO 2  
 PROCNO 1

F2 - Acquisition Parameters  
 Date\_ 20060929  
 Time 17.14  
 INSTRUM spect  
 PROBHD 5 mm broadband  
 PULPROG zgpg30  
 TO 65536  
 SOLVENT CDCl3  
 NS 2113  
 DS 4  
 SWH 30303.031 Hz  
 FIDRES 0.462388 Hz  
 AQ 1.0813940 sec  
 RG 4096  
 DW 16.500 usec  
 DE 4.50 usec  
 TE 300.0 K  
 D1 0.25000000 sec  
 D11 0.03000000 sec

===== CHANNEL f1 =====  
 NUC1 <sup>13</sup>C  
 P1 6.80 usec  
 PL1 0.00 dB  
 SF01 125.766019 MHz

===== CHANNEL f2 =====  
 CPDPRG2 waltz16  
 NUC2 <sup>1</sup>H  
 PCPD2 80.00 usec  
 PL2 -3.00 dB  
 PL12 15.40 dB  
 SF02 500.135010 MHz

F2 - Processing parameters  
 SI 65536  
 SF 125.7627680 MHz  
 MDW EM  
 SSB 0  
 LB 1.00 Hz  
 GB 0  
 PC 2.00

1D NMR plot parameters  
 CX 22.80 cm  
 FIP 220.000 ppm  
 F1 27667.81 Hz  
 F2 -10.000 ppm  
 F2 -1257.63 Hz  
 PPHCM 10.08772 ppm/cm  
 HZCM 1268.65955 Hz/cm



<sup>1</sup>H spectrum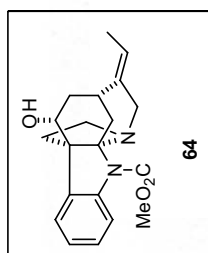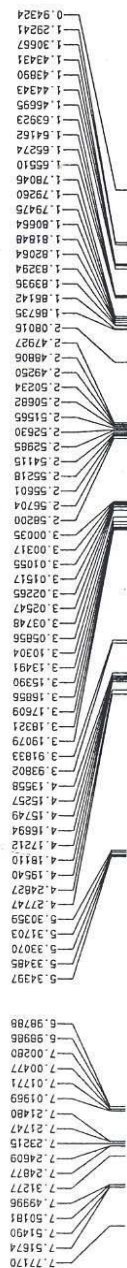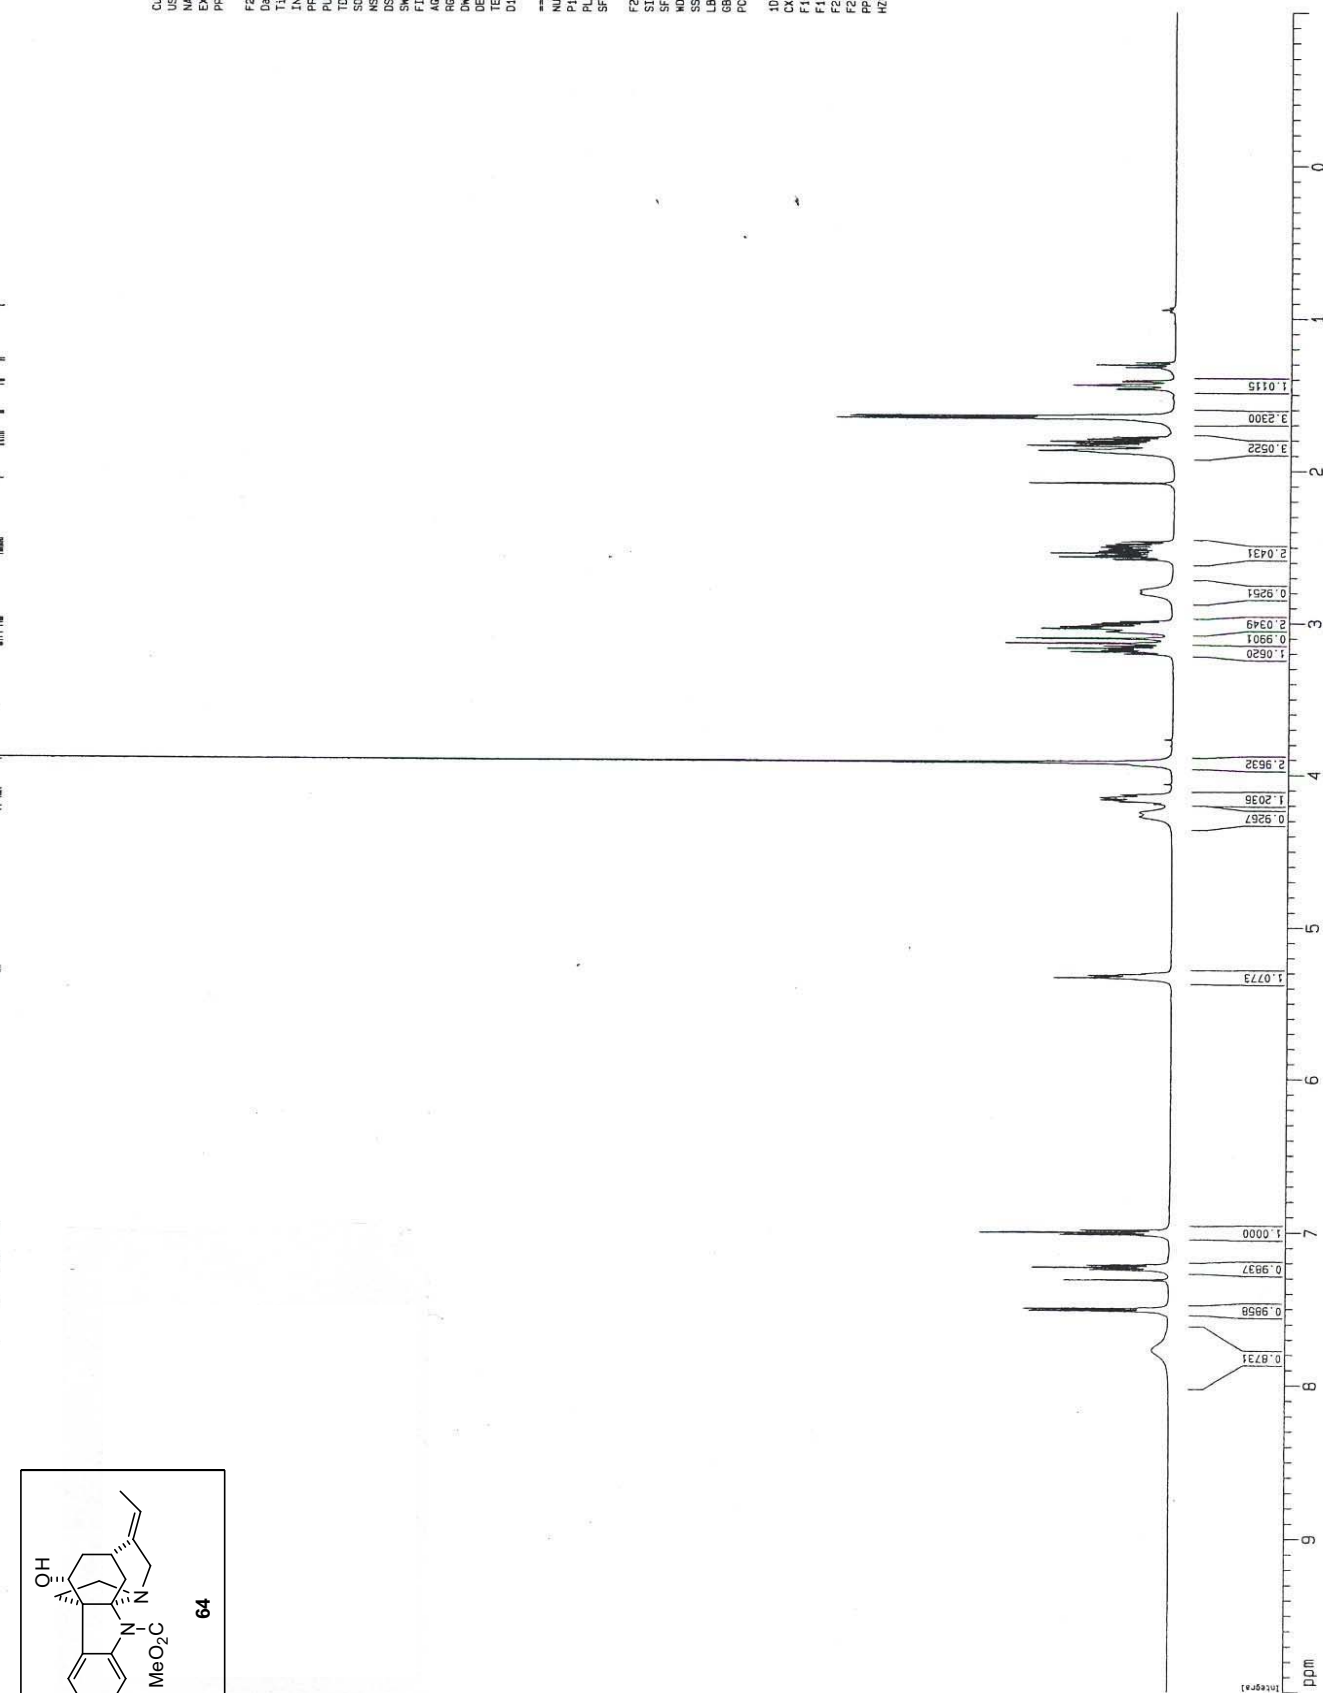

<sup>13</sup>C spectrum with <sup>1</sup>H decoupling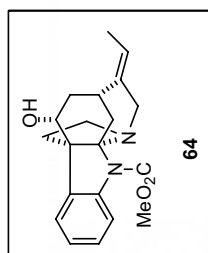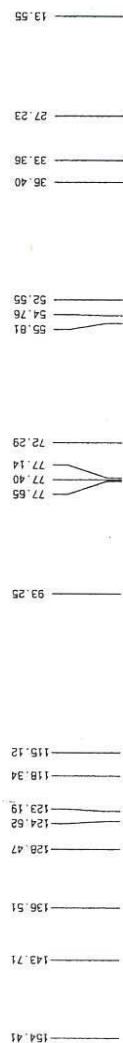

Current Data Parameters  
 USER aeronw  
 NAME adw-11-103  
 EXPNO 2  
 PROCNO 1

F2 - Acquisition Parameters  
 Date\_ 20041005  
 Time 10.40  
 INSTRUM gpc500  
 PROBHD 5 mm broadband  
 PULPROG zgpg30  
 TD 65536  
 SOLVENT CDCl<sub>3</sub>  
 NS 1557  
 DS 4  
 SWH 30303.031 Hz  
 FIDRES 0.462388 Hz  
 AQ 1.0815940 sec  
 RG 4096  
 DM 16.500 usec  
 DE 4.50 usec  
 TE 300.0 K  
 D1 0.25000000 sec  
 D11 0.03000000 sec

===== CHANNEL f1 =====  
 NUC1 <sup>13</sup>C  
 P1 6.80 usec  
 PL1 0.00 dB  
 SF01 125.7766019 MHz

===== CHANNEL f2 =====  
 CPDPRG2 waltz16  
 NUC2 <sup>1</sup>H  
 P2 18.00 usec  
 PL2 -3.00 dB  
 PL12 15.40 dB  
 SF02 500.1355010 MHz

F2 - Processing parameters  
 SI 32768  
 SF 125.7627680 MHz  
 WDM 0  
 SSF 0  
 LB 1.00 Hz  
 GB 0  
 PC 2.00

1D NMR plot parameters  
 CX 22.80 cm  
 FIP 220.000 ppm  
 F1 27667.81 Hz  
 F2P -10.000 ppm  
 F2 -1257.63 Hz  
 PPMQ 10.08772 ppm/cm  
 HZCM 1266.65955 Hz/cm

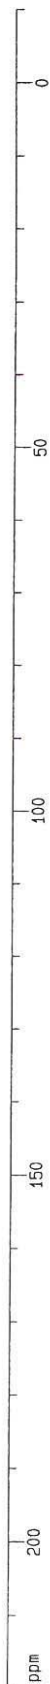

<sup>1</sup>H spectrum

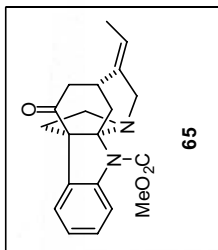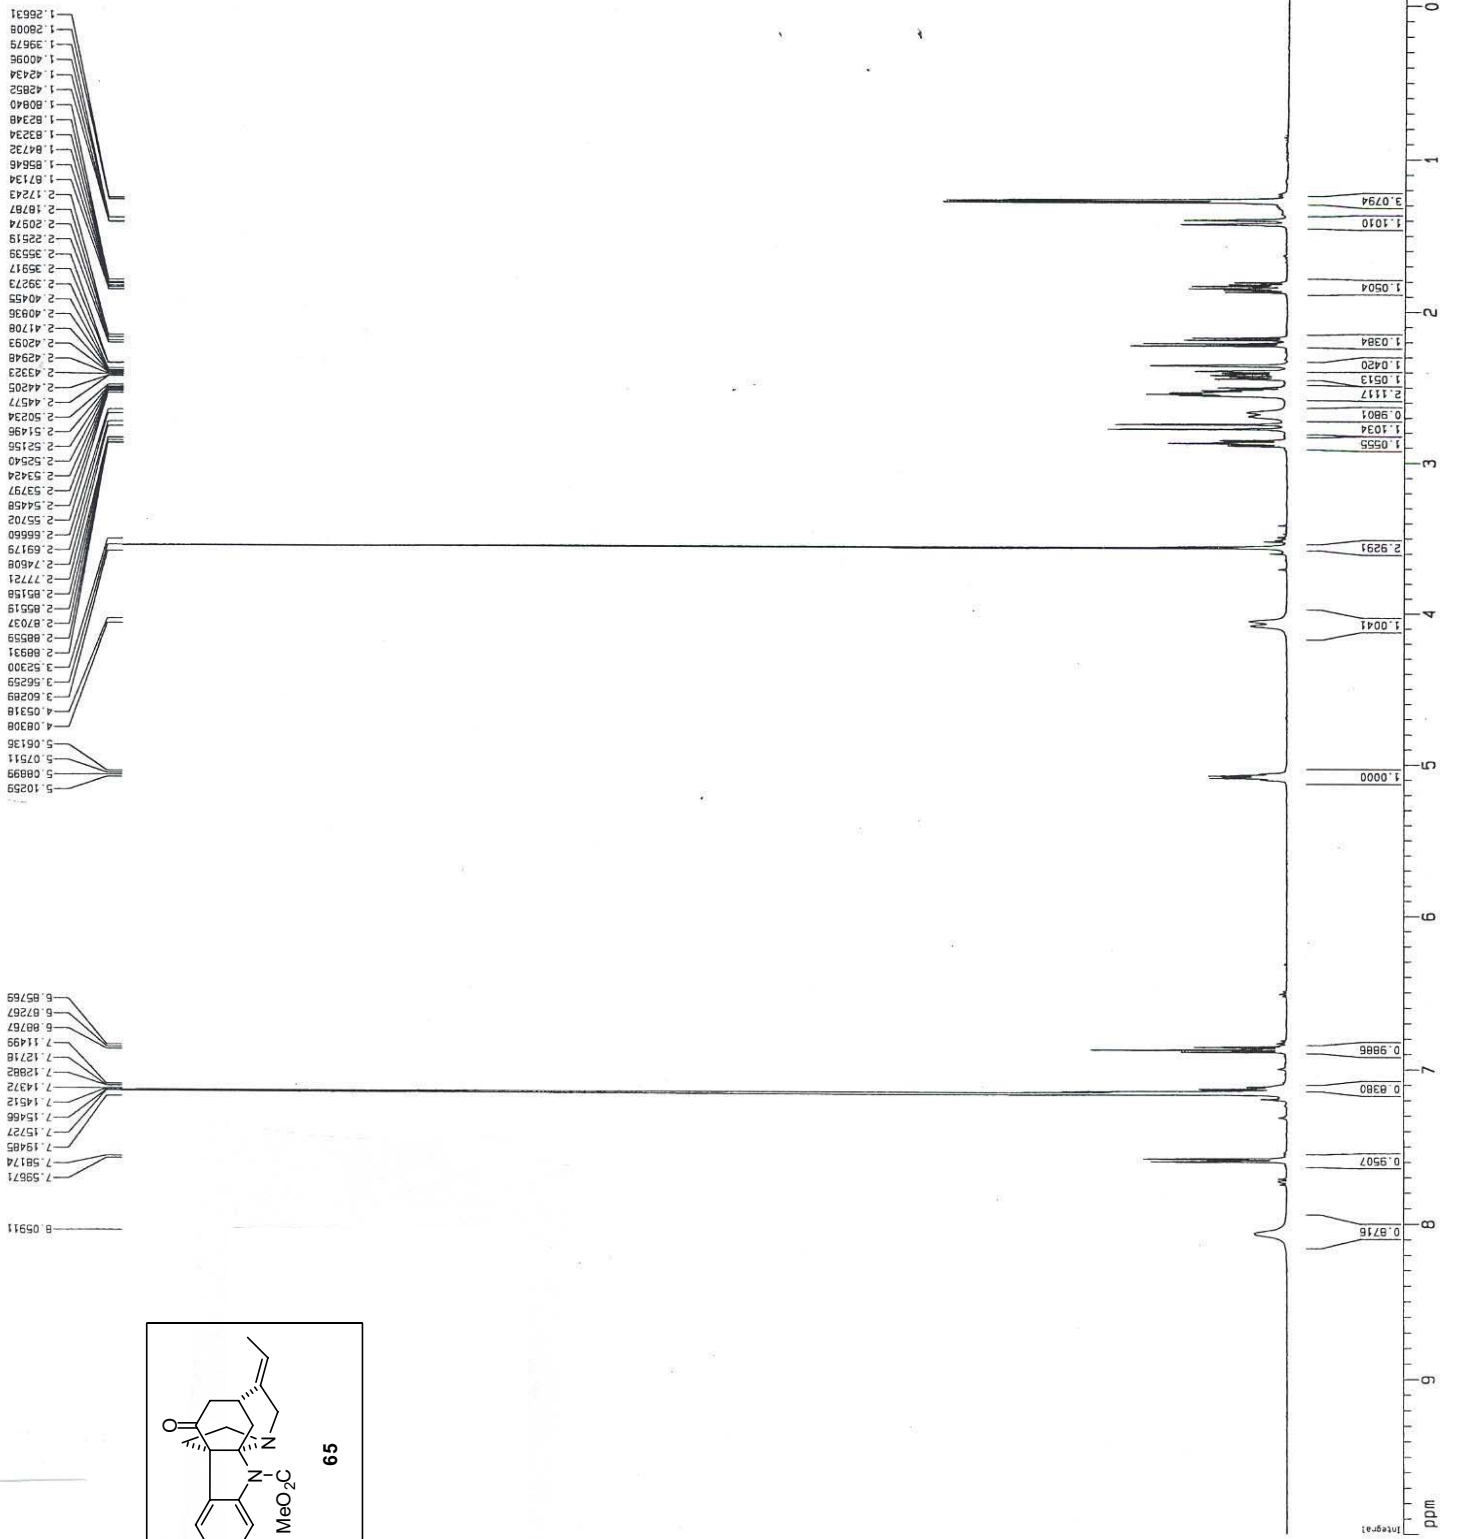

Current Data Parameters  
 USER aaronw  
 NAME adw-11-197-1  
 EXPNO 1  
 PROCNO 1

F2 - Acquisition Parameters  
 Date\_ 20041229  
 Time 10.37  
 INSTRUM omeg500  
 PROBHD 5 mm broadband  
 PULPROG zg30  
 TD 65536  
 SOLVENT CDCl3  
 NS 6  
 DS 2  
 SSN 8012.870 Hz  
 FIDRES 0.098504 Hz  
 AQ 5.098774 sec  
 RG 255  
 DM 62.400 usec  
 DE 6.00 usec  
 TE 300.2 K  
 D1 0.10000000 sec

===== CHANNEL f1 =====  
 NUC1 1H  
 P1 13.00 usec  
 PL1 -1.00 dB  
 SF01 500.2235015 MHz

F2 - Processing parameters  
 SI 65536  
 SF 500.2200000 MHz  
 WDW EM  
 SSF 0  
 LB 0.30 Hz  
 GB 0  
 PC 4.00

1D NMR plot parameters  
 CX 22.80 cm  
 FID 10.000 cm  
 F1 5002.20 Hz  
 F2 -1.000 cm  
 F3 -500.22 Hz  
 PPMCM 0.48245 ppm/cm  
 HZCM 241.33421 Hz/cm

<sup>13</sup>C<sub>s</sub> spectrum with <sup>1</sup>H decoupling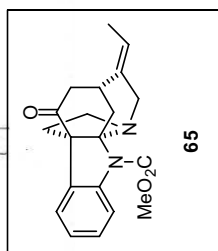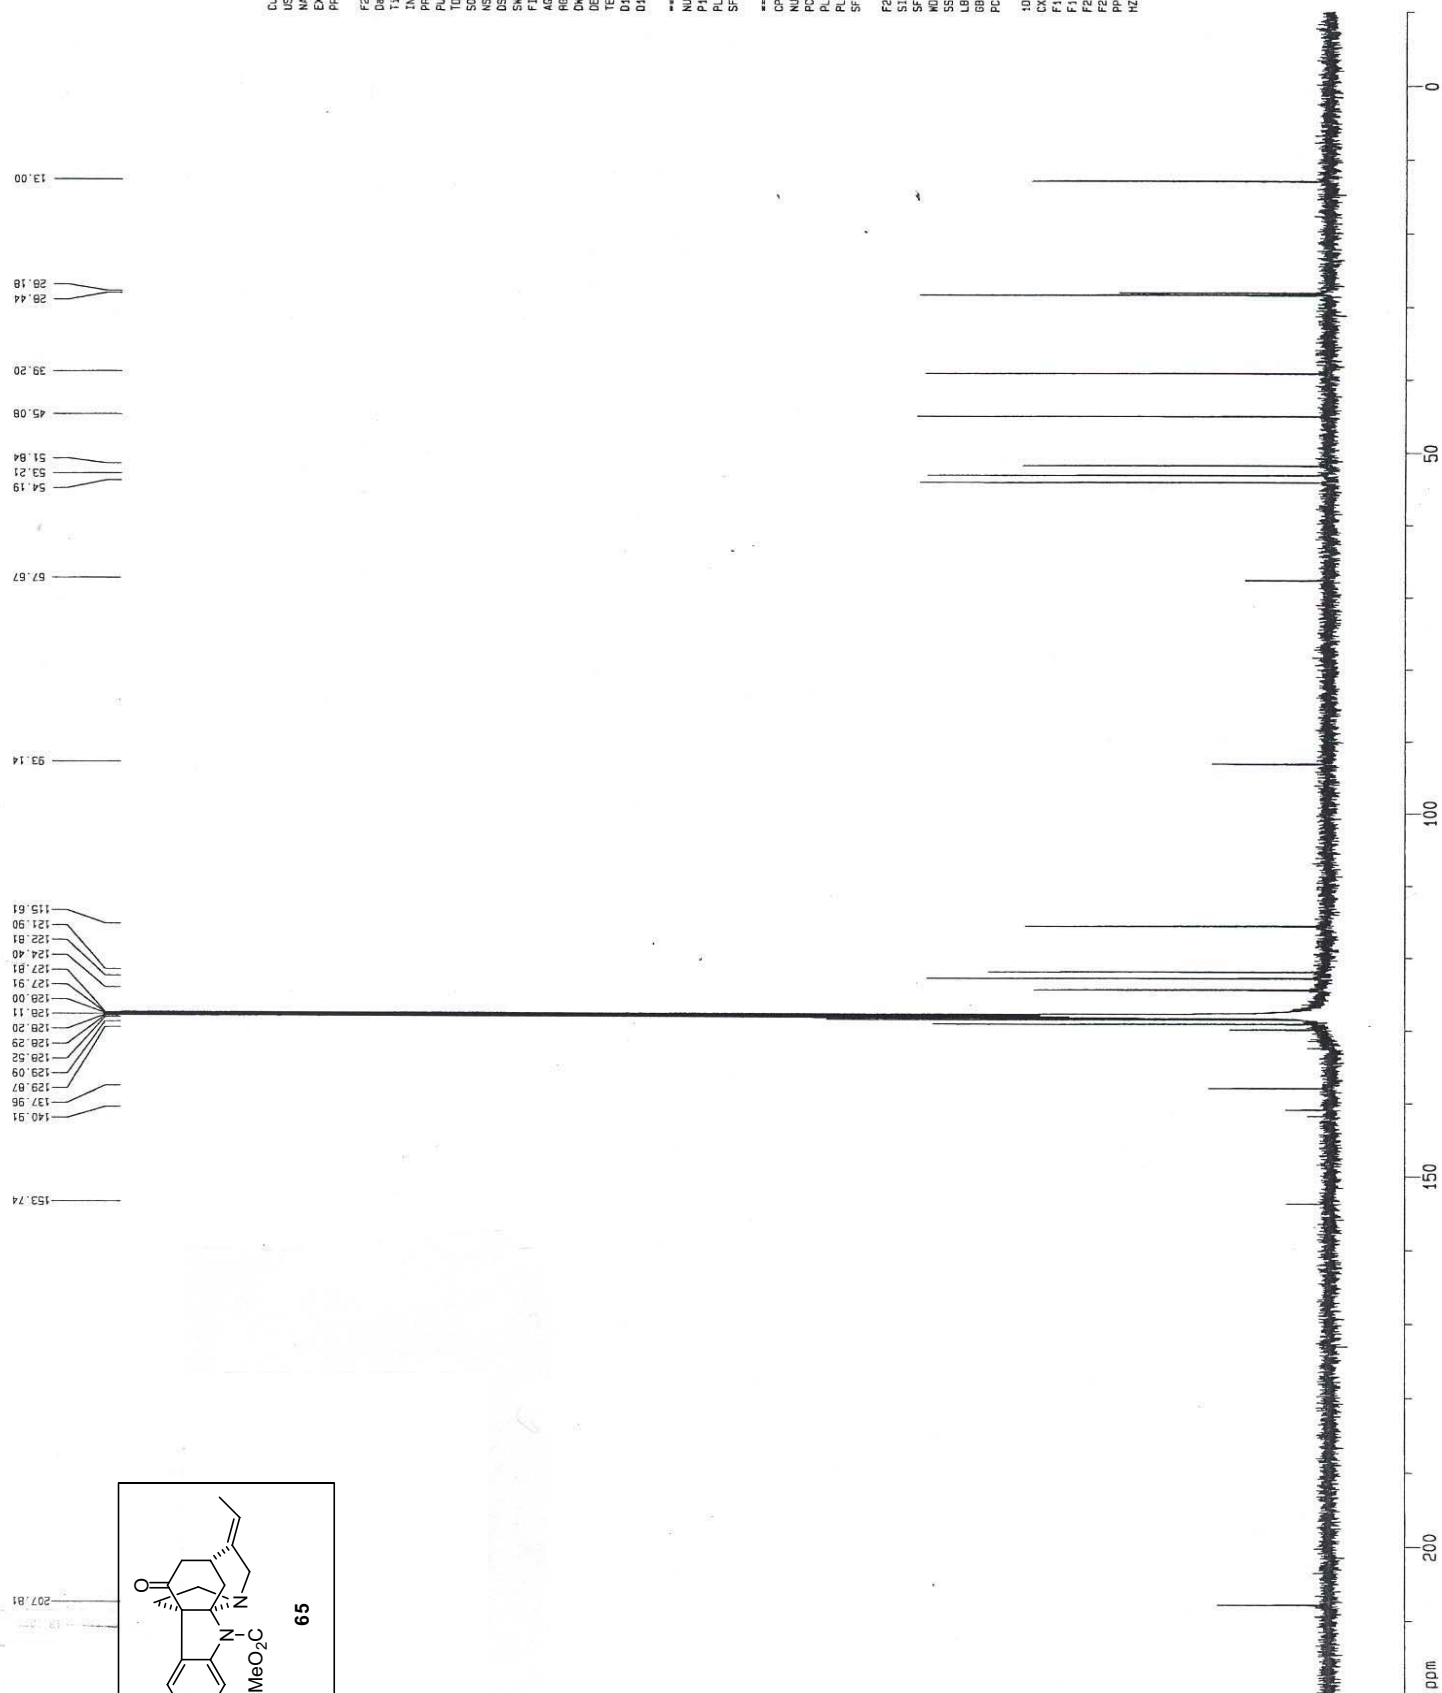

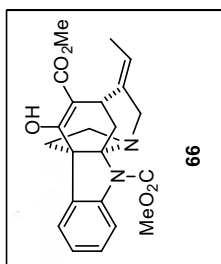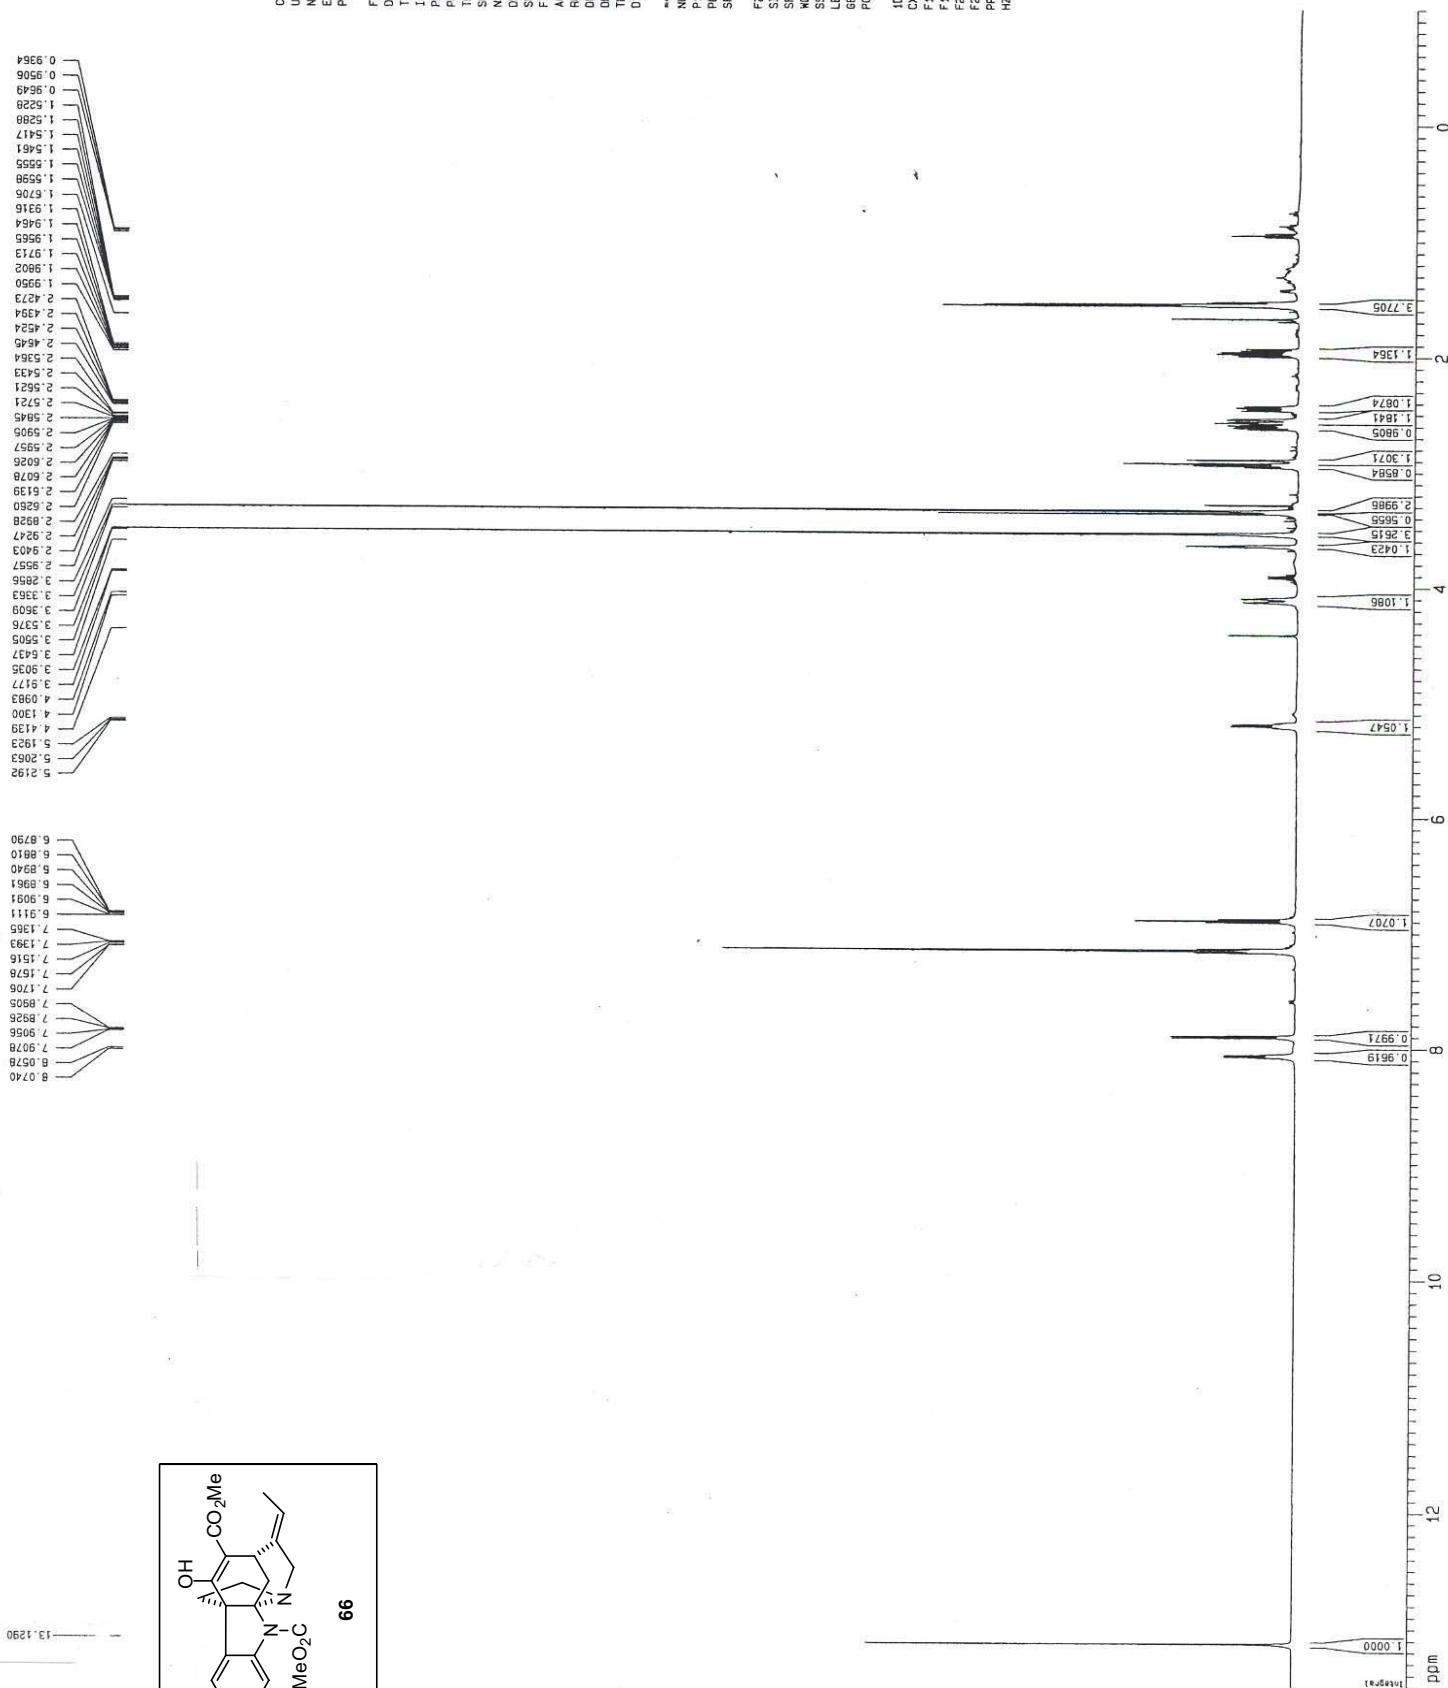

<sup>13</sup>C spectrum with <sup>1</sup>H decoupling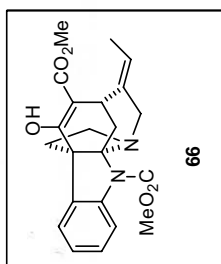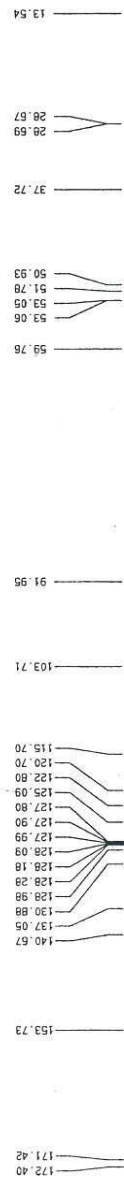

Current Data Parameters  
 USER admin  
 NAME adv-II-105  
 EXPNO 2  
 PROCNO 1

F2 - Acquisition Parameters  
 Date\_ 20041007  
 Time 6.19  
 INSTRUM spect  
 PROBHD 5 mm broadband  
 PULPROG zgpg30  
 TD 65536  
 SOLVENT CDCl3  
 NS 644  
 DS 4  
 SWH 30303.031 Hz  
 FIDRES 0.462368 Hz  
 AQ 1.0813940 sec  
 RG 2866.3  
 DM 16.500 usec  
 DE 4.50 usec  
 TE 300.2 K  
 D1 0.25000000 sec  
 D11 0.03000000 sec

===== CHANNEL f1 =====  
 NUC1 <sup>13</sup>C  
 P1 6.80 usec  
 PL1 0.00 dB  
 SFO1 125.776619 MHz

===== CHANNEL f2 =====  
 NUC2 <sup>1</sup>H  
 P2 80.00 usec  
 PL2 -3.00 dB  
 PL12 15.40 dB  
 SFO2 500.135010 MHz

F2 - Processing parameters  
 SI 65536  
 SF 125.7627600 MHz  
 MDW EN  
 SS 0  
 LB 1.00 Hz  
 GB 0  
 PC 2.00

1D NMR plot parameters  
 CA 22.80 cm  
 F1P 220.000 ppm  
 F1 2760.731 Hz  
 F2P -1.000 ppm  
 F2 -125.63 Hz  
 PRACH 10.0872 ppm/cm  
 HZCN 1268.65955 Hz/cm

ppm 200 150 100 50 0



<sup>1</sup>H spectrum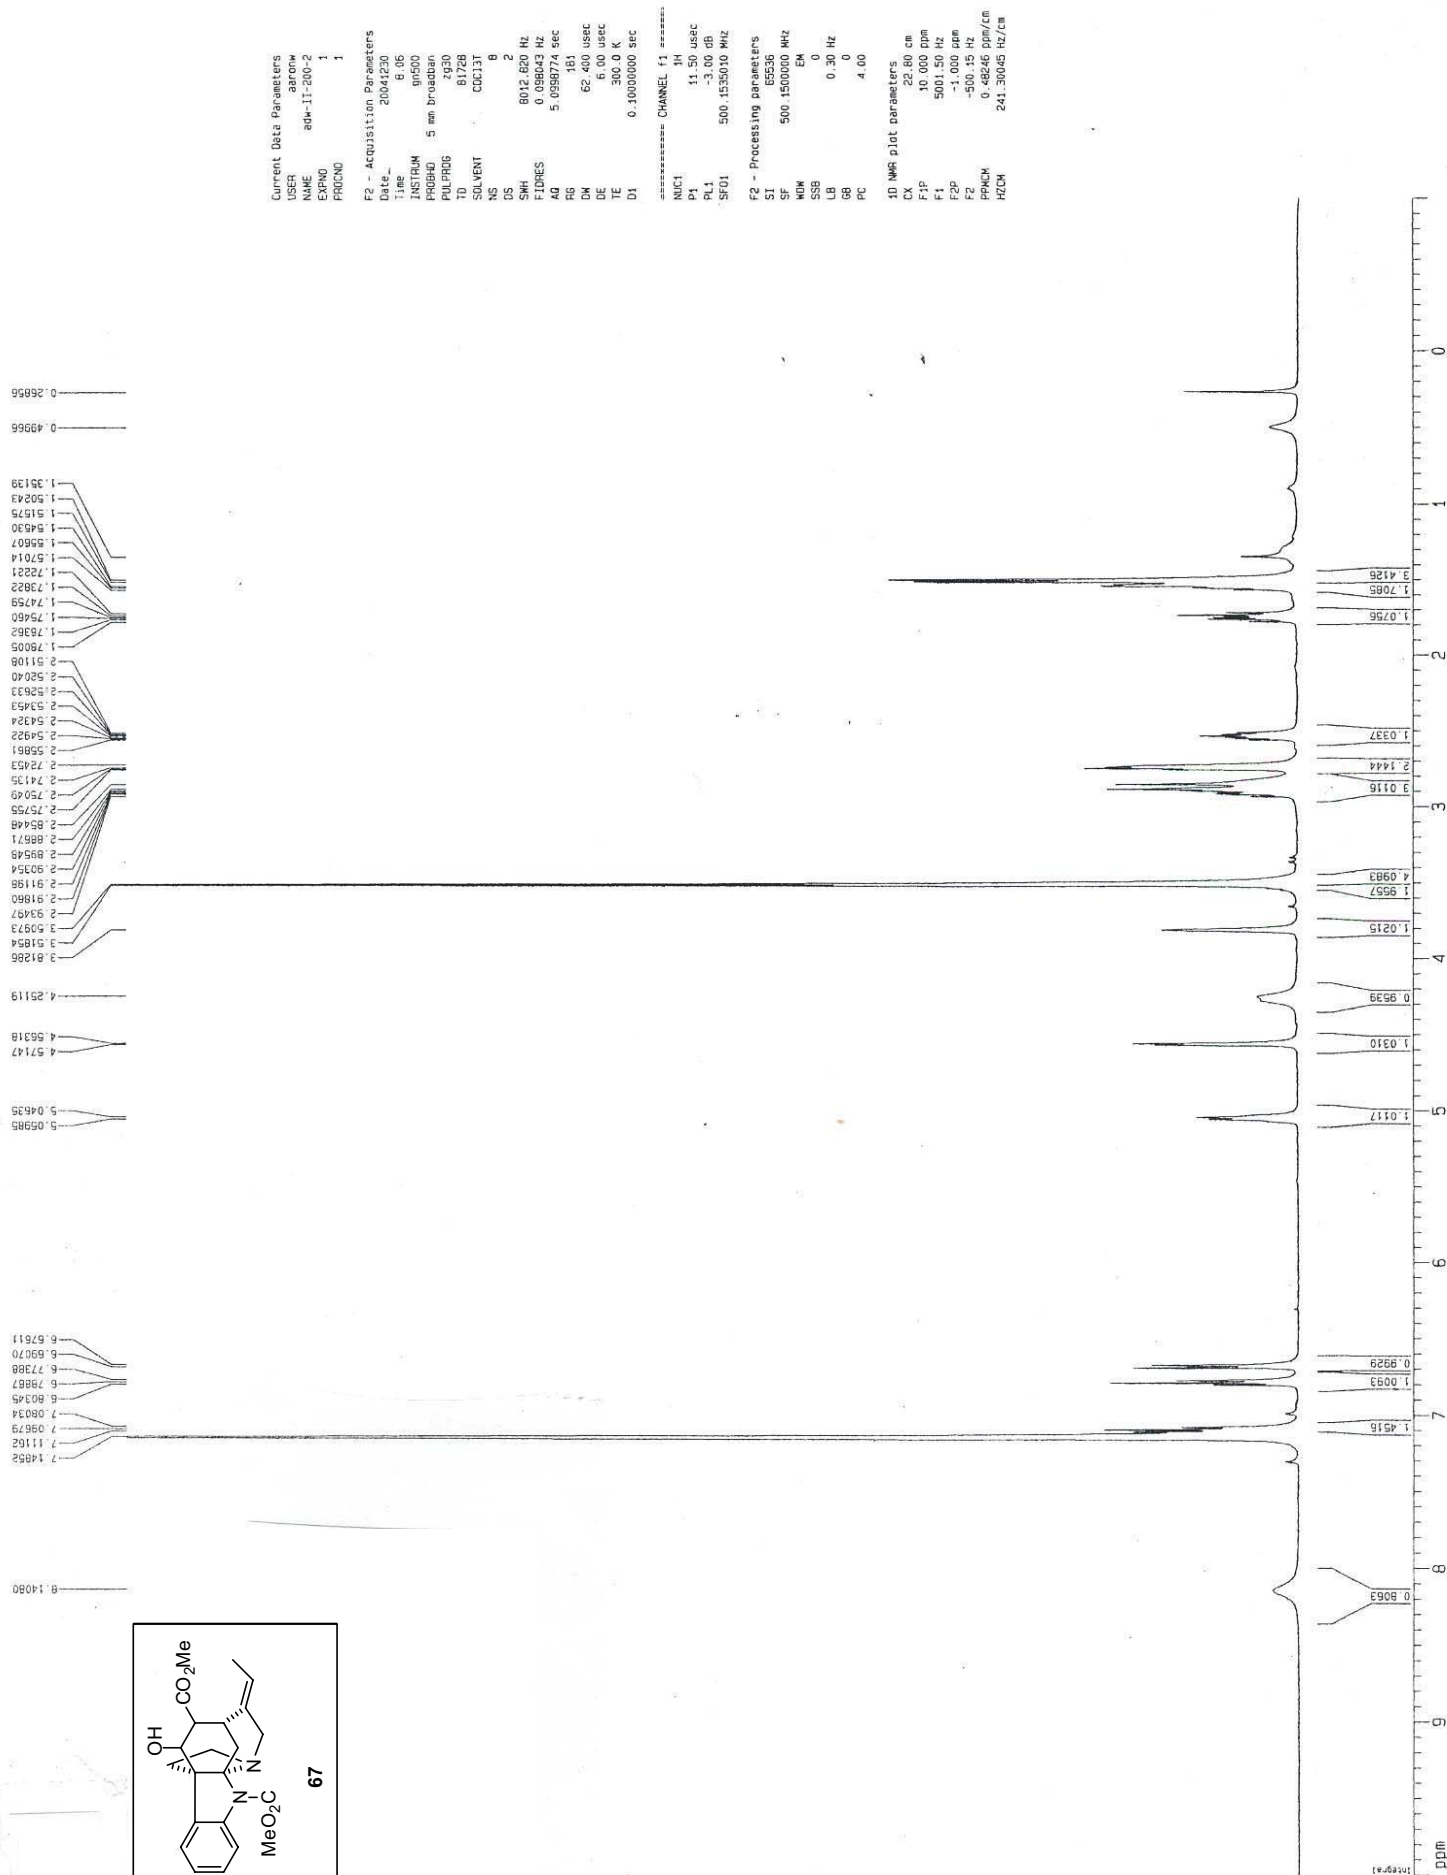

<sup>13</sup>C spectrum with <sup>1</sup>H decoupling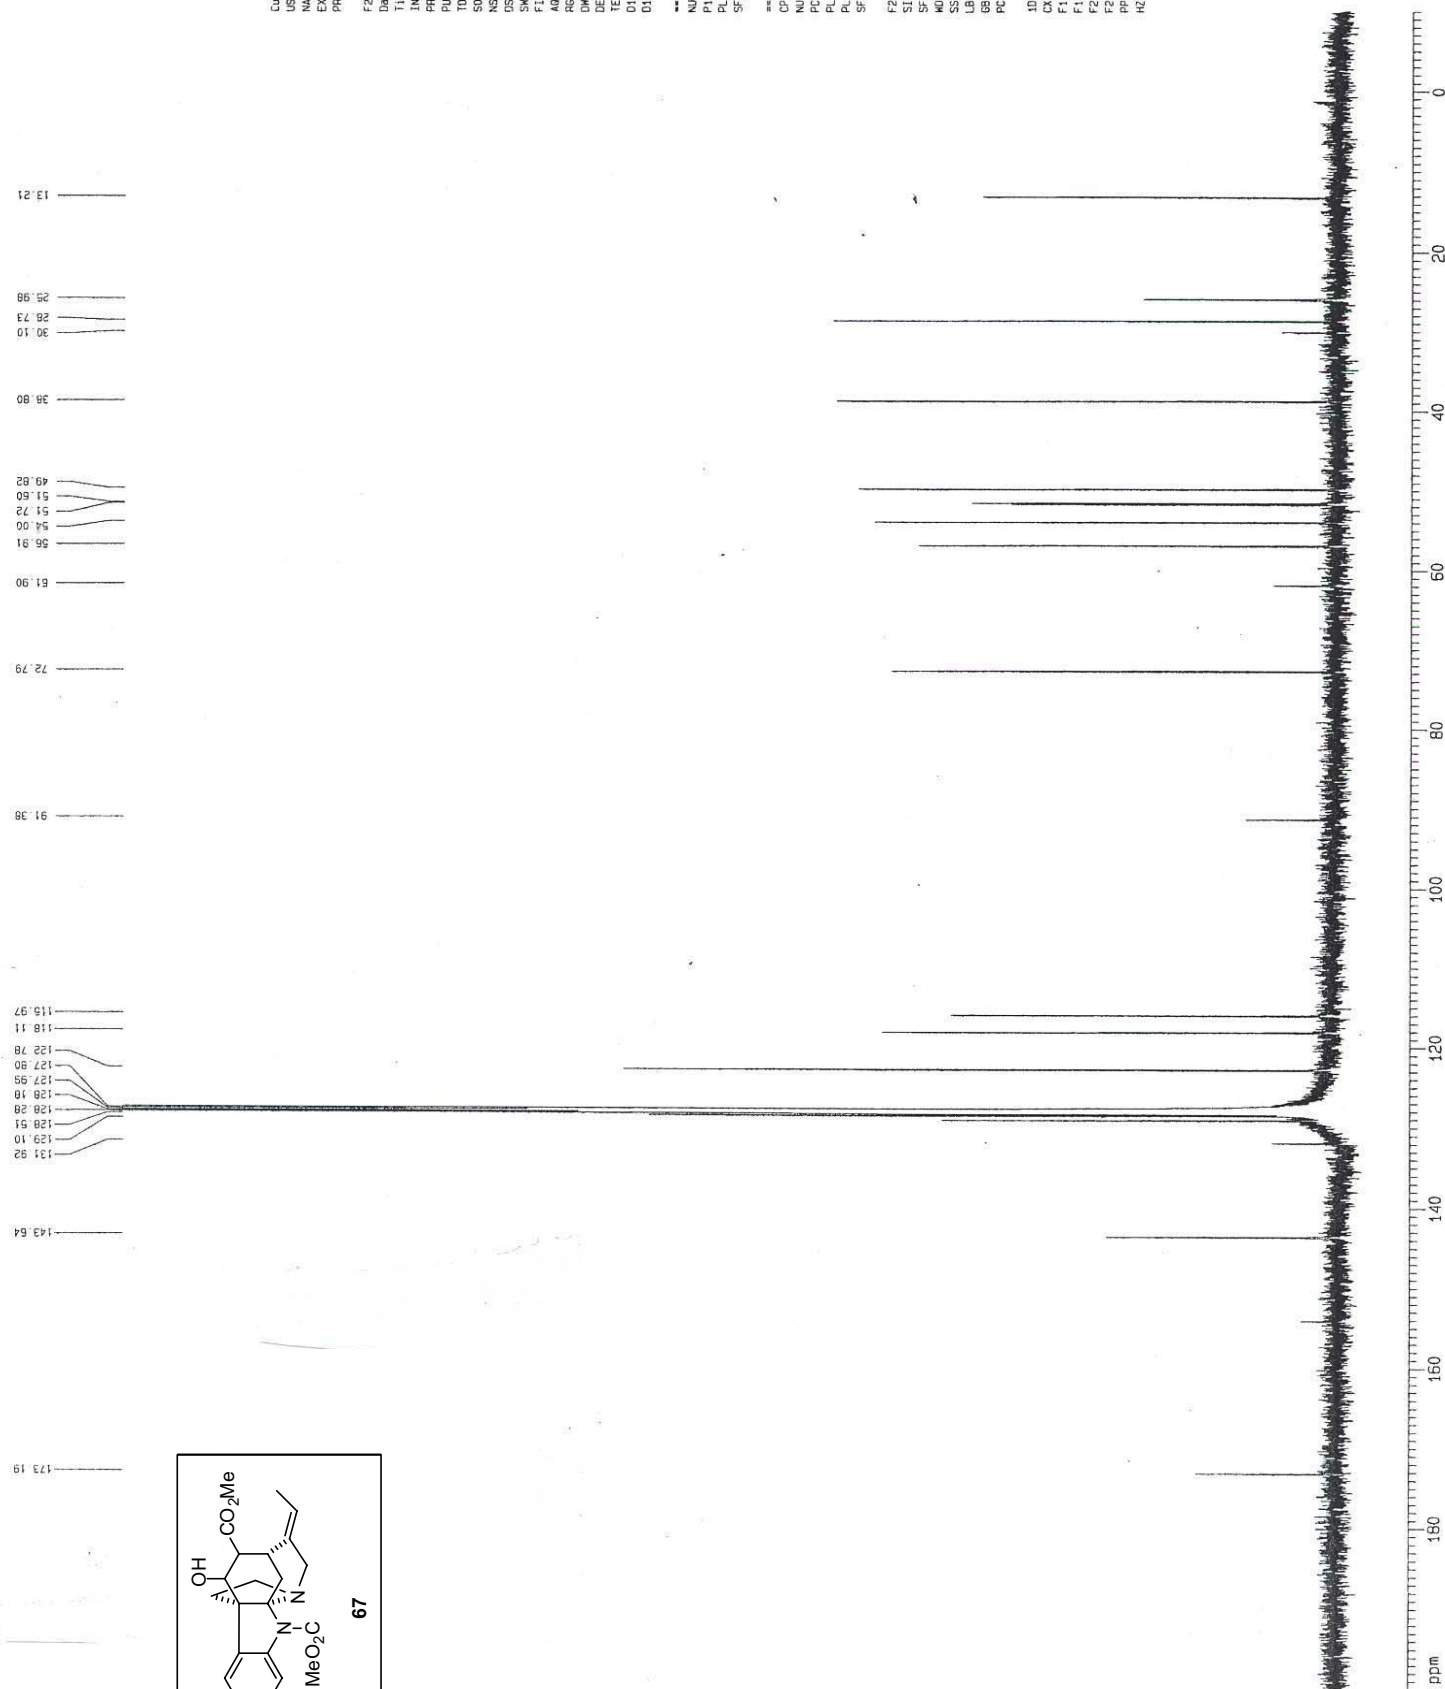



<sup>1</sup>H spectrum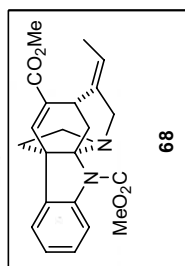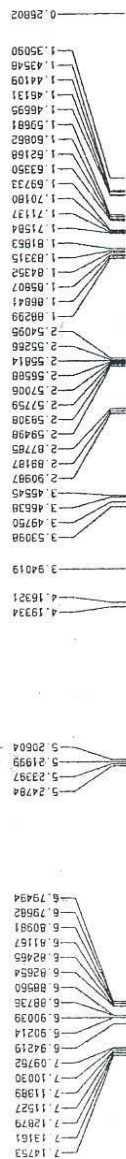

Current Data Parameters  
 USER aarcw  
 NAME adn-11-204-1  
 EXPNO 1  
 PROCNO 1

F2 - Acquisition Parameters  
 Date\_ 20041229  
 Time 10.28  
 INSTRUM 5 mm broadband  
 PROBHD 5 mm broadband  
 PULPROG zgpg30  
 TD 65536  
 SOLVENT CDCl3  
 NS 8  
 DS 2  
 SWH 8012.820 Hz  
 FIDRES 0.098045 Hz  
 AQ 5.0989774 sec  
 RG 62.400 ussec  
 DW 6.00 ussec  
 DE 6.00 ussec  
 TE 300.0 K  
 D1 0.1000000 sec

===== CHANNEL f1 =====  
 NUC1 1H  
 P1 11.50 ussec  
 PL1 -3.00 dB  
 SF01 500.1535010 MHz

F2 - Processing parameters  
 S1 65536  
 SF 500.1500000 MHz  
 MCN 0  
 EN 0  
 SSB 0  
 LB 0.30 Hz  
 GB 0  
 PC 4.00

10 MHz plot parameters  
 CK 22.80 cm  
 F1 10.000 ppm  
 F2 5001.50 Hz  
 F2P -1.000 ppm  
 F2 -500.15 Hz  
 PHA0 0.48246 ppm/cm  
 HZCN 241.30045 Hz/cm

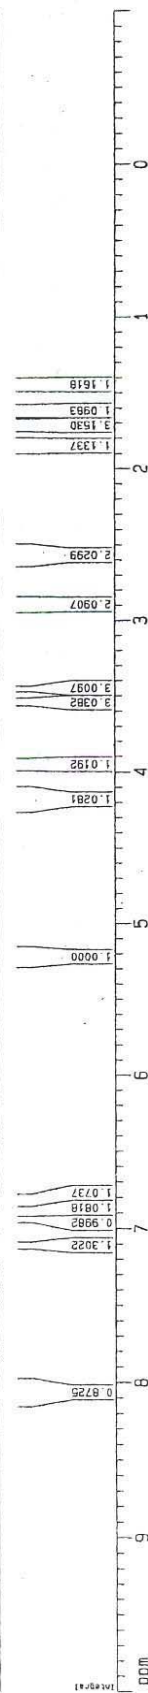

<sup>13</sup>C spectrum with <sup>1</sup>H decoupling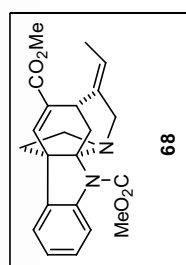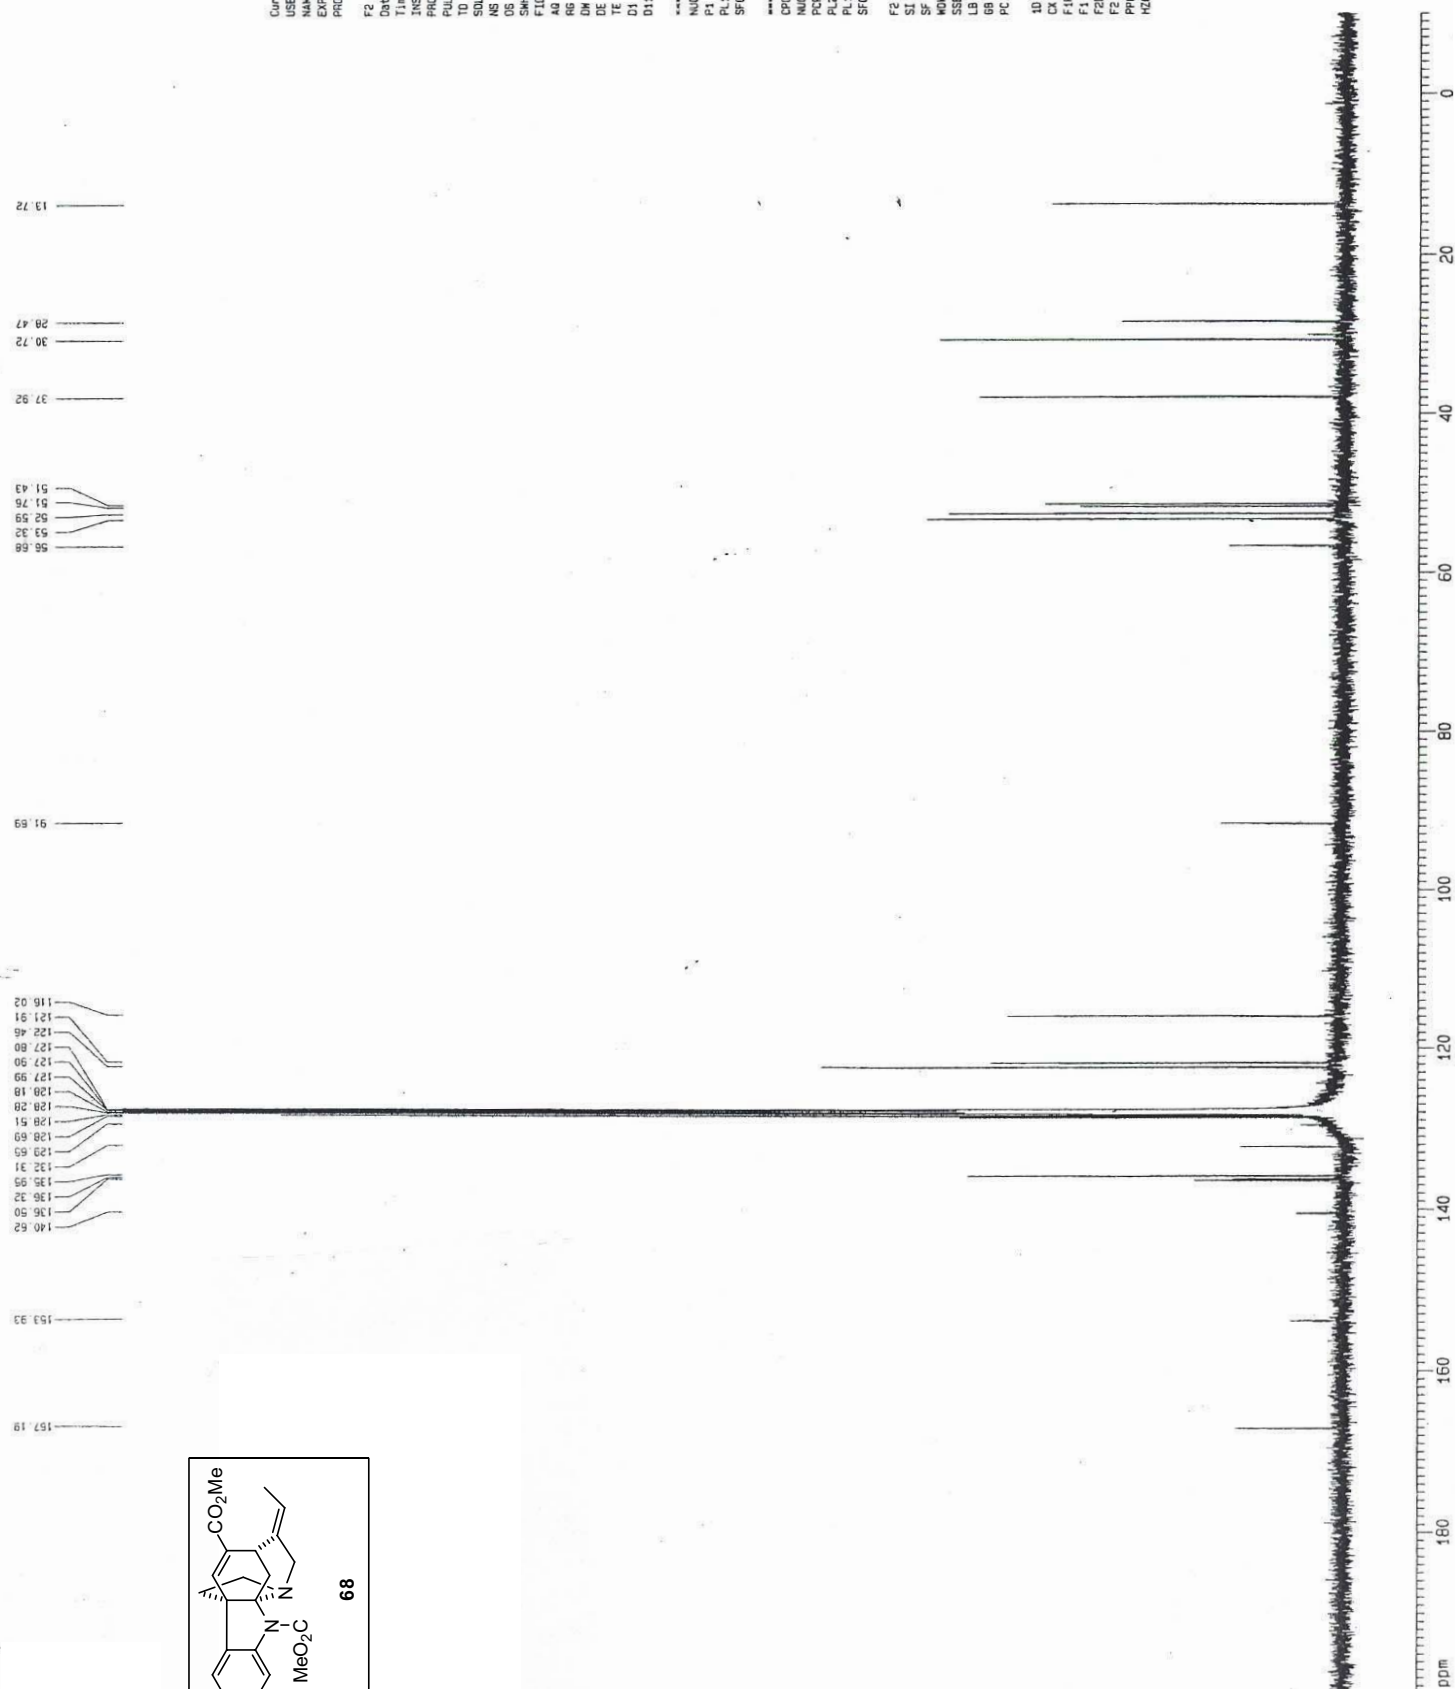

Current Data Parameters  
 USER: admin  
 NAME: admin-11-2014-1  
 EXPNO: 2  
 PROCNO: 1

F2 - Acquisition Parameters  
 Date\_: 20041228  
 Time: 10.41  
 INSTRUM: spect  
 PULPROG: zgpg30  
 TO: 20041228  
 SOLVENT: DMSO  
 NS: 3878  
 DS: 4  
 SM: 30303.031 Hz  
 FIDRES: 0.462388 Hz  
 AQ: 1.0813840 sec  
 RG: 4096  
 DM: 16.500 usec  
 DE: 4.50 usec  
 TE: 300.0 K  
 D1: 0.25000000 sec  
 D11: 0.03000000 sec

===== CHANNEL f1 =====  
 NUC1: <sup>13</sup>C  
 P1: 6.60 usec  
 PL1: 0.00 dB  
 SF01: 125.7766019 MHz

===== CHANNEL f2 =====  
 CPDPRG2: waltz16  
 NUC2: <sup>1</sup>H  
 P2: 88.00 usec  
 PL2: 2.00 dB  
 PL12: 15.40 dB  
 SF02: 500.1355010 MHz

F2 - Processing parameters  
 SI: 65536  
 SF: 125.7627680 MHz  
 NQM: EM  
 SSB: 0  
 LB: 1.00 Hz  
 GB: 0  
 PC: 2.00

1D NMR plot parameters  
 CX: 22.80 cm  
 FIP: 200.000 ppm  
 F1: 25152.55 Hz  
 F2P: -10.000 ppm  
 F2: -1257.63 Hz  
 PPMCM: 9.21053 ppm/cm  
 HZCM: 1156.34131 Hz/cm

<sup>1</sup>H spectrum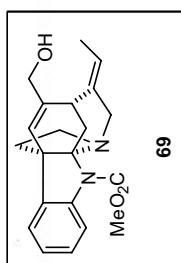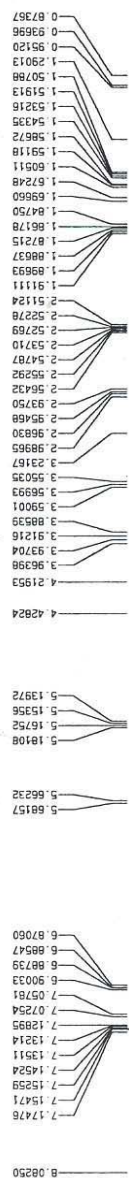

Current Data Parameters  
 USER aaronw  
 NAME adw-11-205  
 EXPNO 1  
 PROCNO 1

F2 - Acquisition Parameters  
 Date\_ 20041221  
 Time 9.26  
 INSTRUM omega500  
 PROBHD 5 mm broadband  
 PULPROG zg30  
 TD 6728  
 SOLVENT CDCl<sub>3</sub>  
 NS 2  
 DS 2  
 SWH 8012.850 Hz  
 FIDRES 0.096043 Hz  
 AQ 5.098774 sec  
 RG 64  
 DM 62.400 usec  
 DE 6.00 usec  
 TE 300.0 K  
 D1 0.10000000 sec

===== CHANNEL f1 =====  
 NUC1 1H  
 P1 13.00 usec  
 PL1 -1.00 dB  
 SFO1 500.2235015 MHz

F2 - Processing parameters  
 SI 65536  
 SF 500.2200000 MHz  
 WDW EM  
 SSF 0  
 LB 0.30 Hz  
 GB 0  
 PC 4.00

1D NMR plot parameters  
 EX 12.60 cm  
 FAP 1.00000000  
 F1 5002.20 Hz  
 F2 -500.22 Hz  
 PPMH 0.48245 ppm/cm  
 HZCM 241.33421 Hz/cm

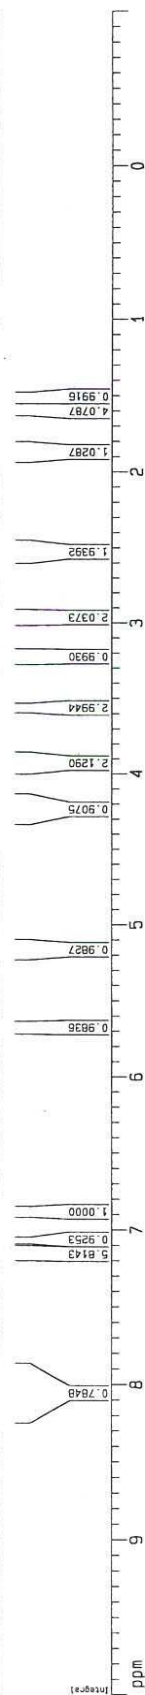

<sup>13</sup>C spectrum with <sup>1</sup>H decoupling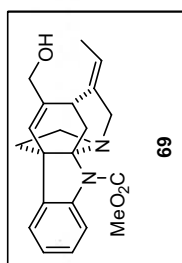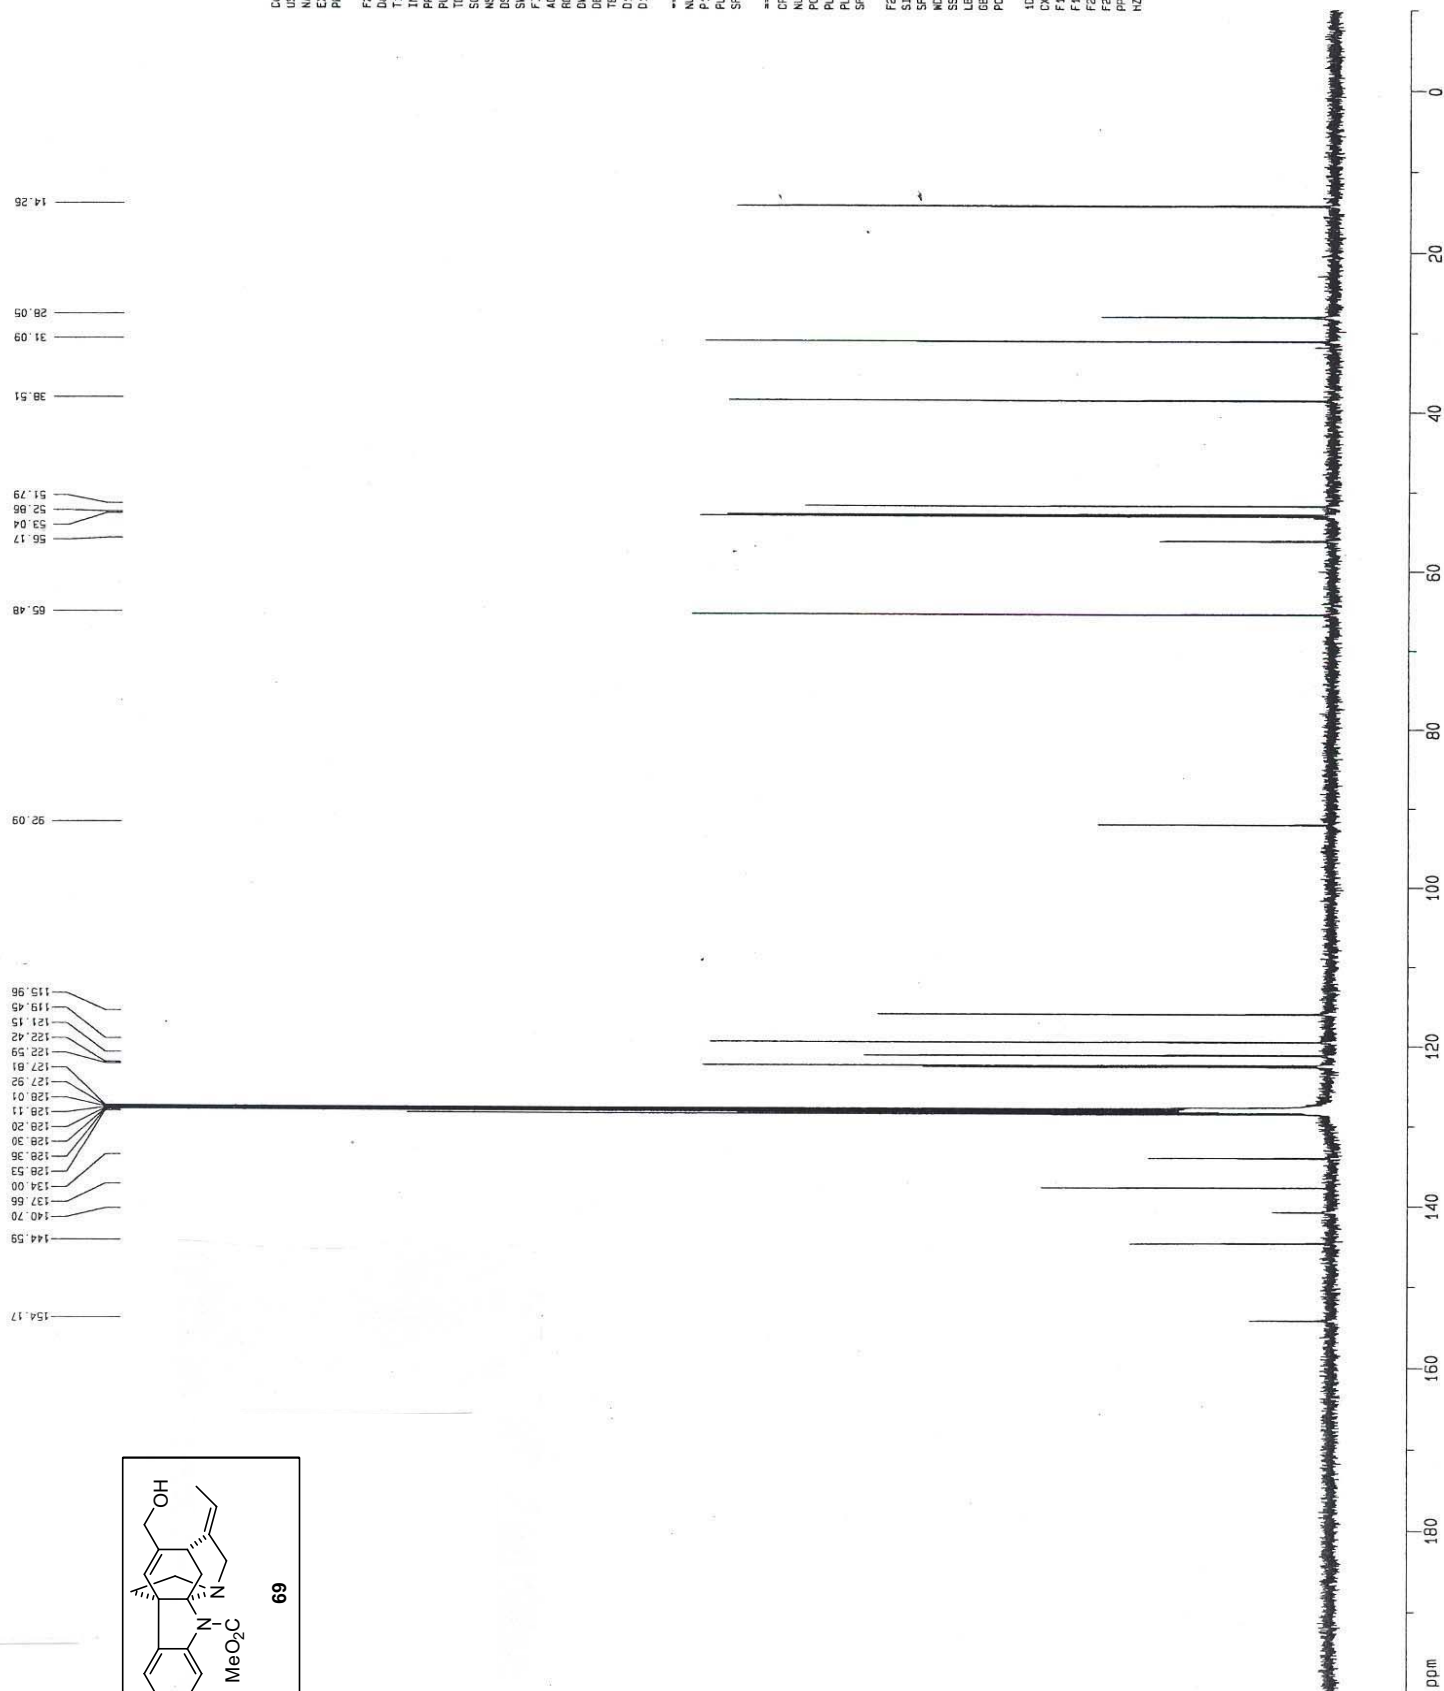

# <sup>1</sup>H spectrum

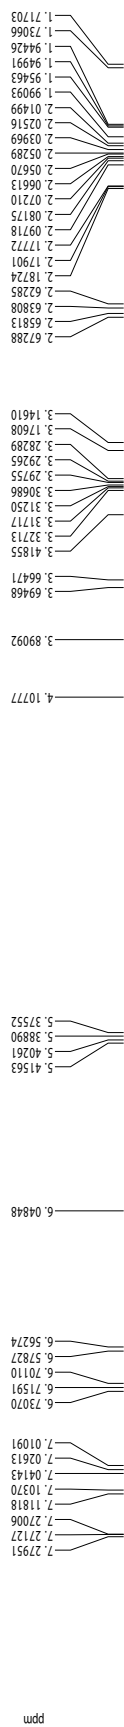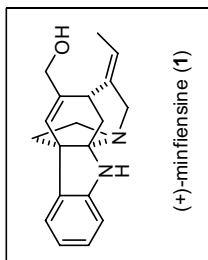

Current Data Parameters  
 USER philip  
 NAME adw11-206-2  
 EXPNO 1  
 PROCNO 1

F2 - Acquisition Parameters  
 Date\_ 20050523  
 Time 16.23  
 INSTRUM gn500  
 PROBHD 5 mm broadband  
 PULPROG zg30  
 TD 81728  
 SOLVENT CDCl3  
 NS 8  
 DS 2  
 SWH 8012.822 Hz  
 FIDRES 0.0988043 Hz  
 AQ 5.0988774 sec  
 RG 256  
 DW 62.400 usec  
 DE 6.00 usec  
 TE 300.0 K  
 D1 0.10000000 sec

===== CHANNEL f1 =====  
 NUC1 1H  
 P1 11.50 usec  
 PL1 -3.00 dB  
 SFO1 500.0455003 MHz

F2 - Processing parameters  
 SI 6556  
 SF 500.0400271 MHz  
 WDW 0  
 SSB 0  
 LB 0.00 Hz  
 GB 0  
 PC 4.00

1D NMR plot parameters  
 CX 22.80 cm  
 CY 7.00 cm  
 FIP 8.000 ppm  
 F1 4000.32 Hz  
 F2P 1.500 ppm  
 FZ 750.06 Hz  
 PPMCM 0.28509 ppm/cm  
 HZCM 142.5528 Hz/cm

<sup>13</sup>C spectrum with <sup>1</sup>H decoupling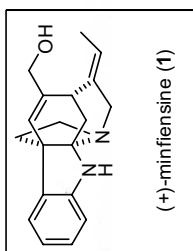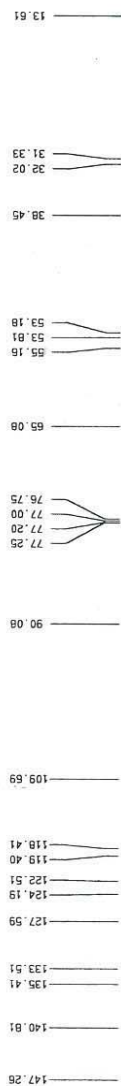

Current Data Parameters  
 USER aaronw  
 NAME adw-11-205-1  
 EXPNO 2  
 PROCNO 1

F2 - Acquisition Parameters  
 Date\_ 20041222  
 Time 15.05  
 INSTRUM oregon500  
 PROBHD 5 mm broadband  
 PULPROG zgpg30  
 TD 65536  
 SOLVENT CDCl3  
 NS 725  
 DS 4  
 SWH 30093.00 Hz  
 FIDRES 0.46388 Hz  
 AQ 1.081300 sec  
 RG 3649.1  
 DW 19.500 usec  
 DE 4.50 usec  
 TE 300.0 K  
 D1 0.2500000 sec  
 D11 0.0300000 sec

===== CHANNEL f1 =====  
 NUC1 <sup>13</sup>C  
 P1 22.50 usec  
 PL1 -6.00 dB  
 SF01 125.7942048 MHz

===== CHANNEL f2 =====  
 CPDPRG2 waltz16  
 NUC2 <sup>1</sup>H  
 PCPD2 80.00 usec  
 PL2 -1.00 dB  
 PL12 14.40 dB  
 SF02 500.2330013 MHz

F2 - Processing parameters  
 SI 65536  
 SF 125.7804373 MHz  
 WDW EM  
 SSB 0  
 LB 1.00 Hz  
 GB 0  
 PC 2.00

1D NMR plot parameters  
 CX 22.80 cm  
 F1P 200.000 gpa  
 F1 25156.08 Hz  
 F2P -10.000 gpa  
 F2 -1257.80 Hz  
 PPMCM 9.21053 ppm/cm  
 HZCM 1158.50391 Hz/cm

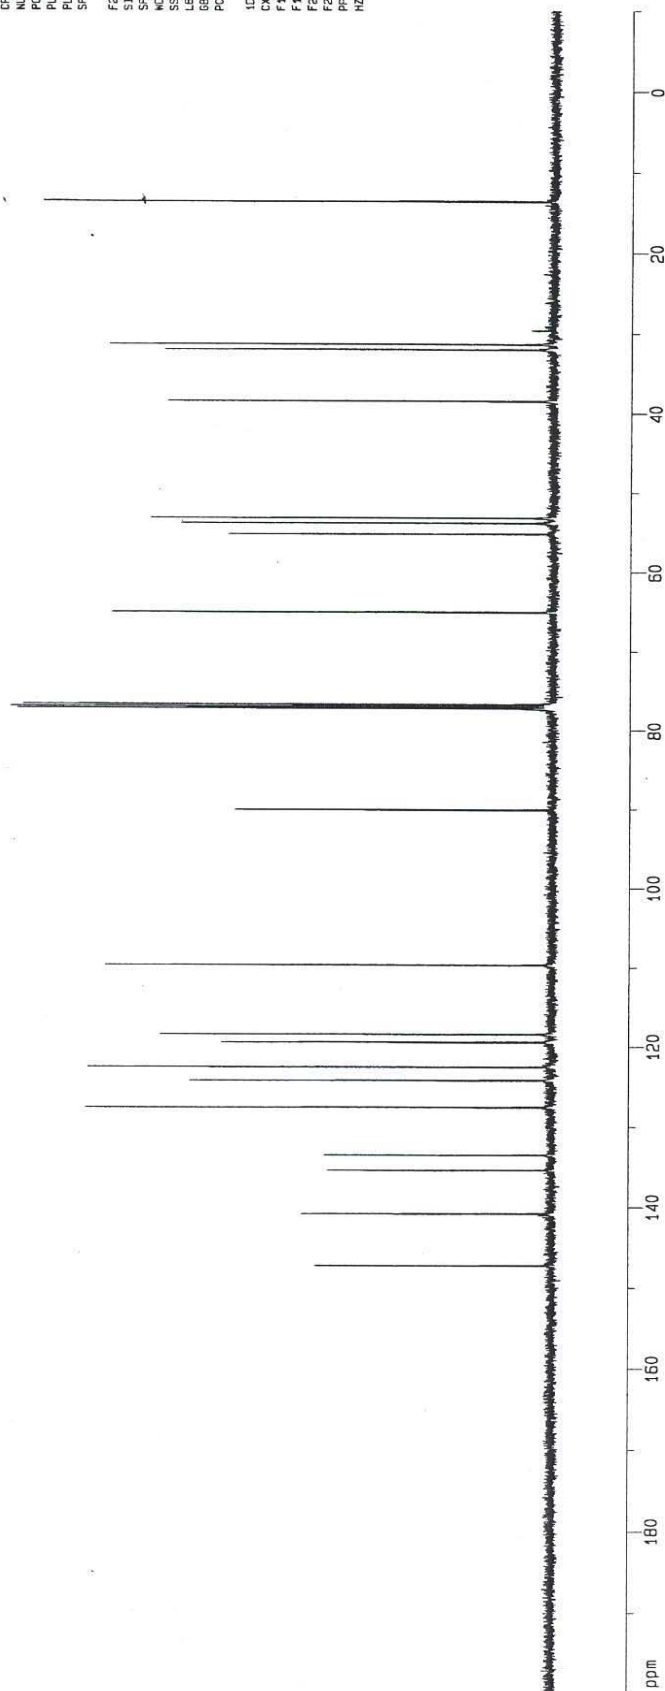



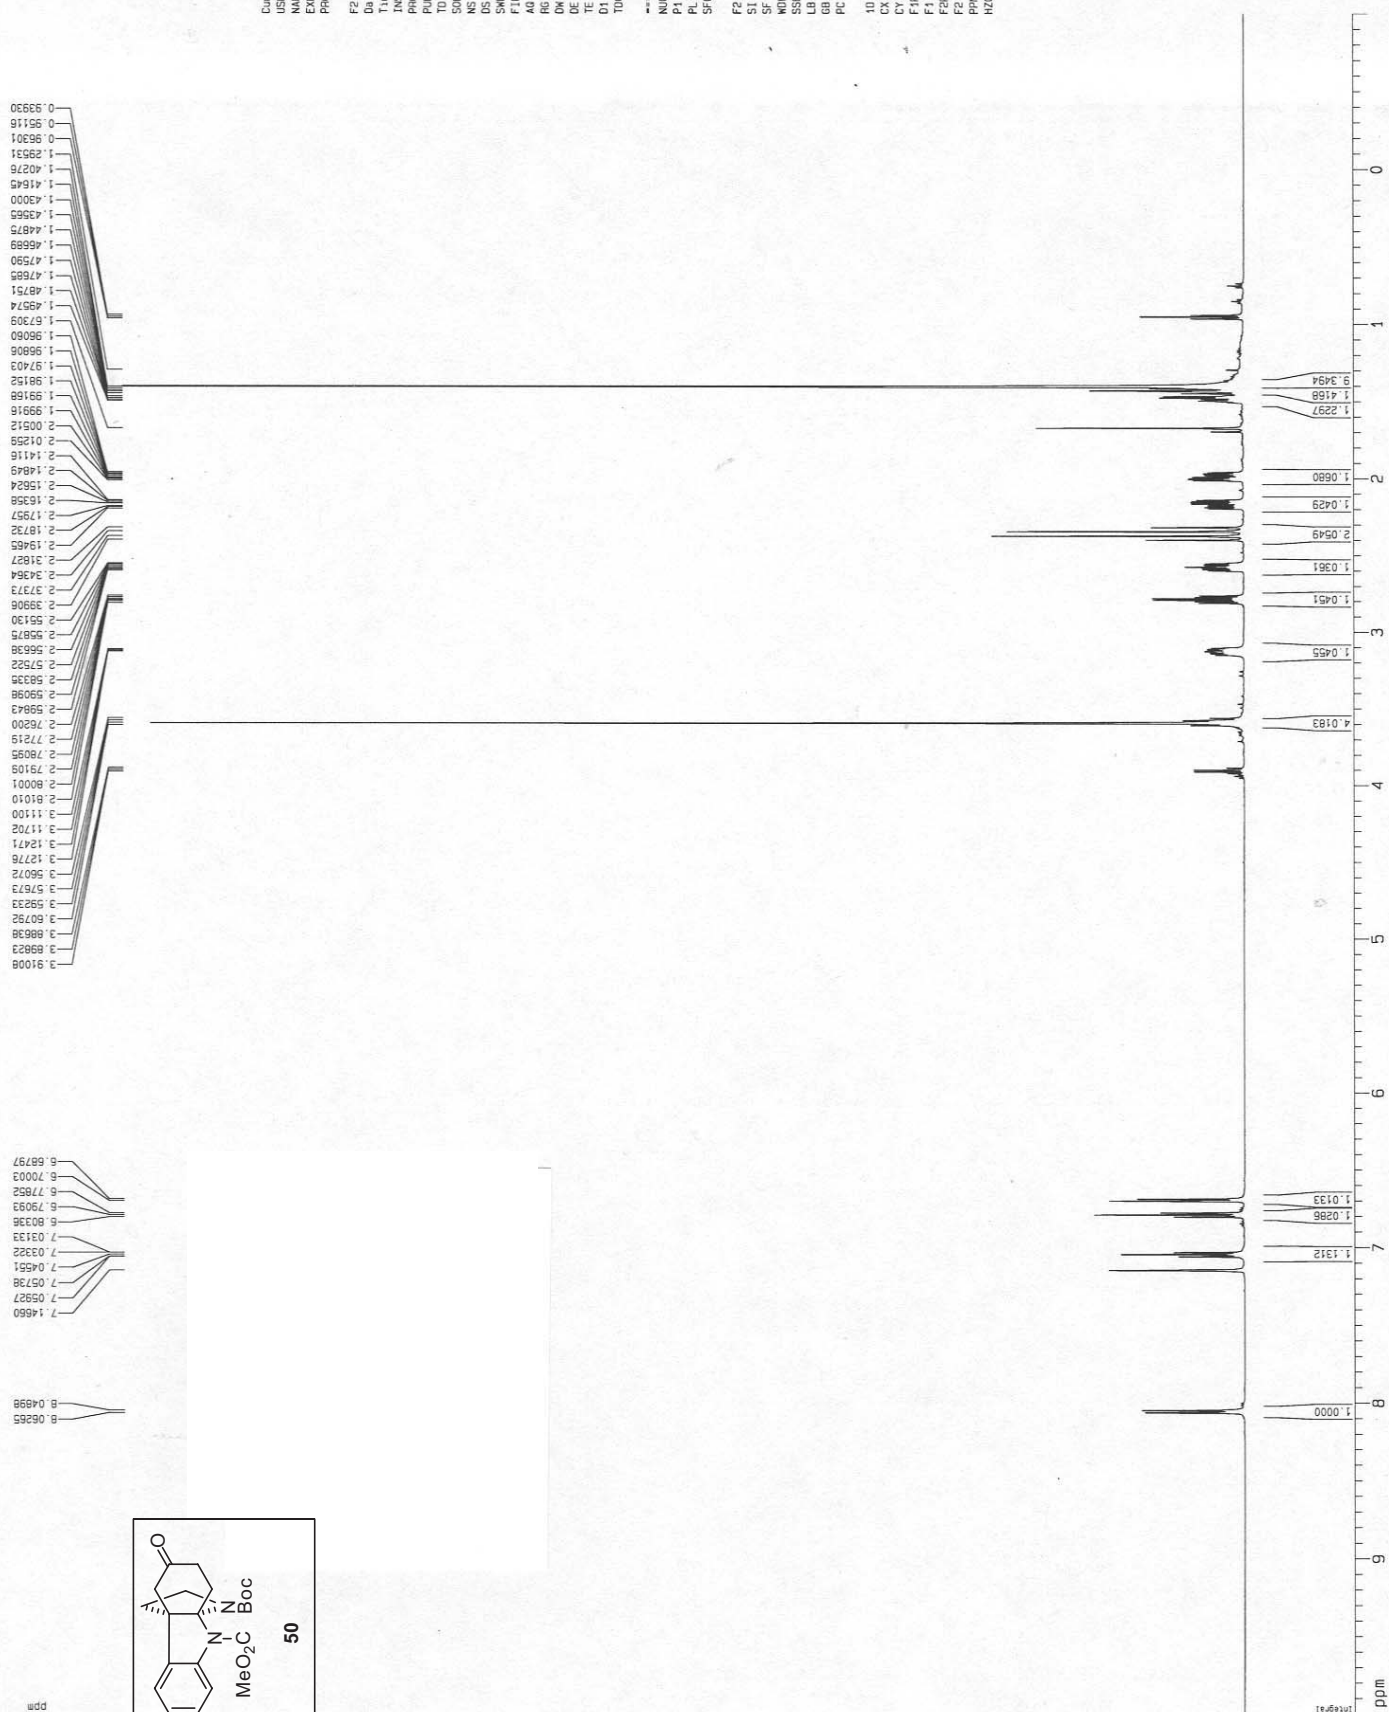

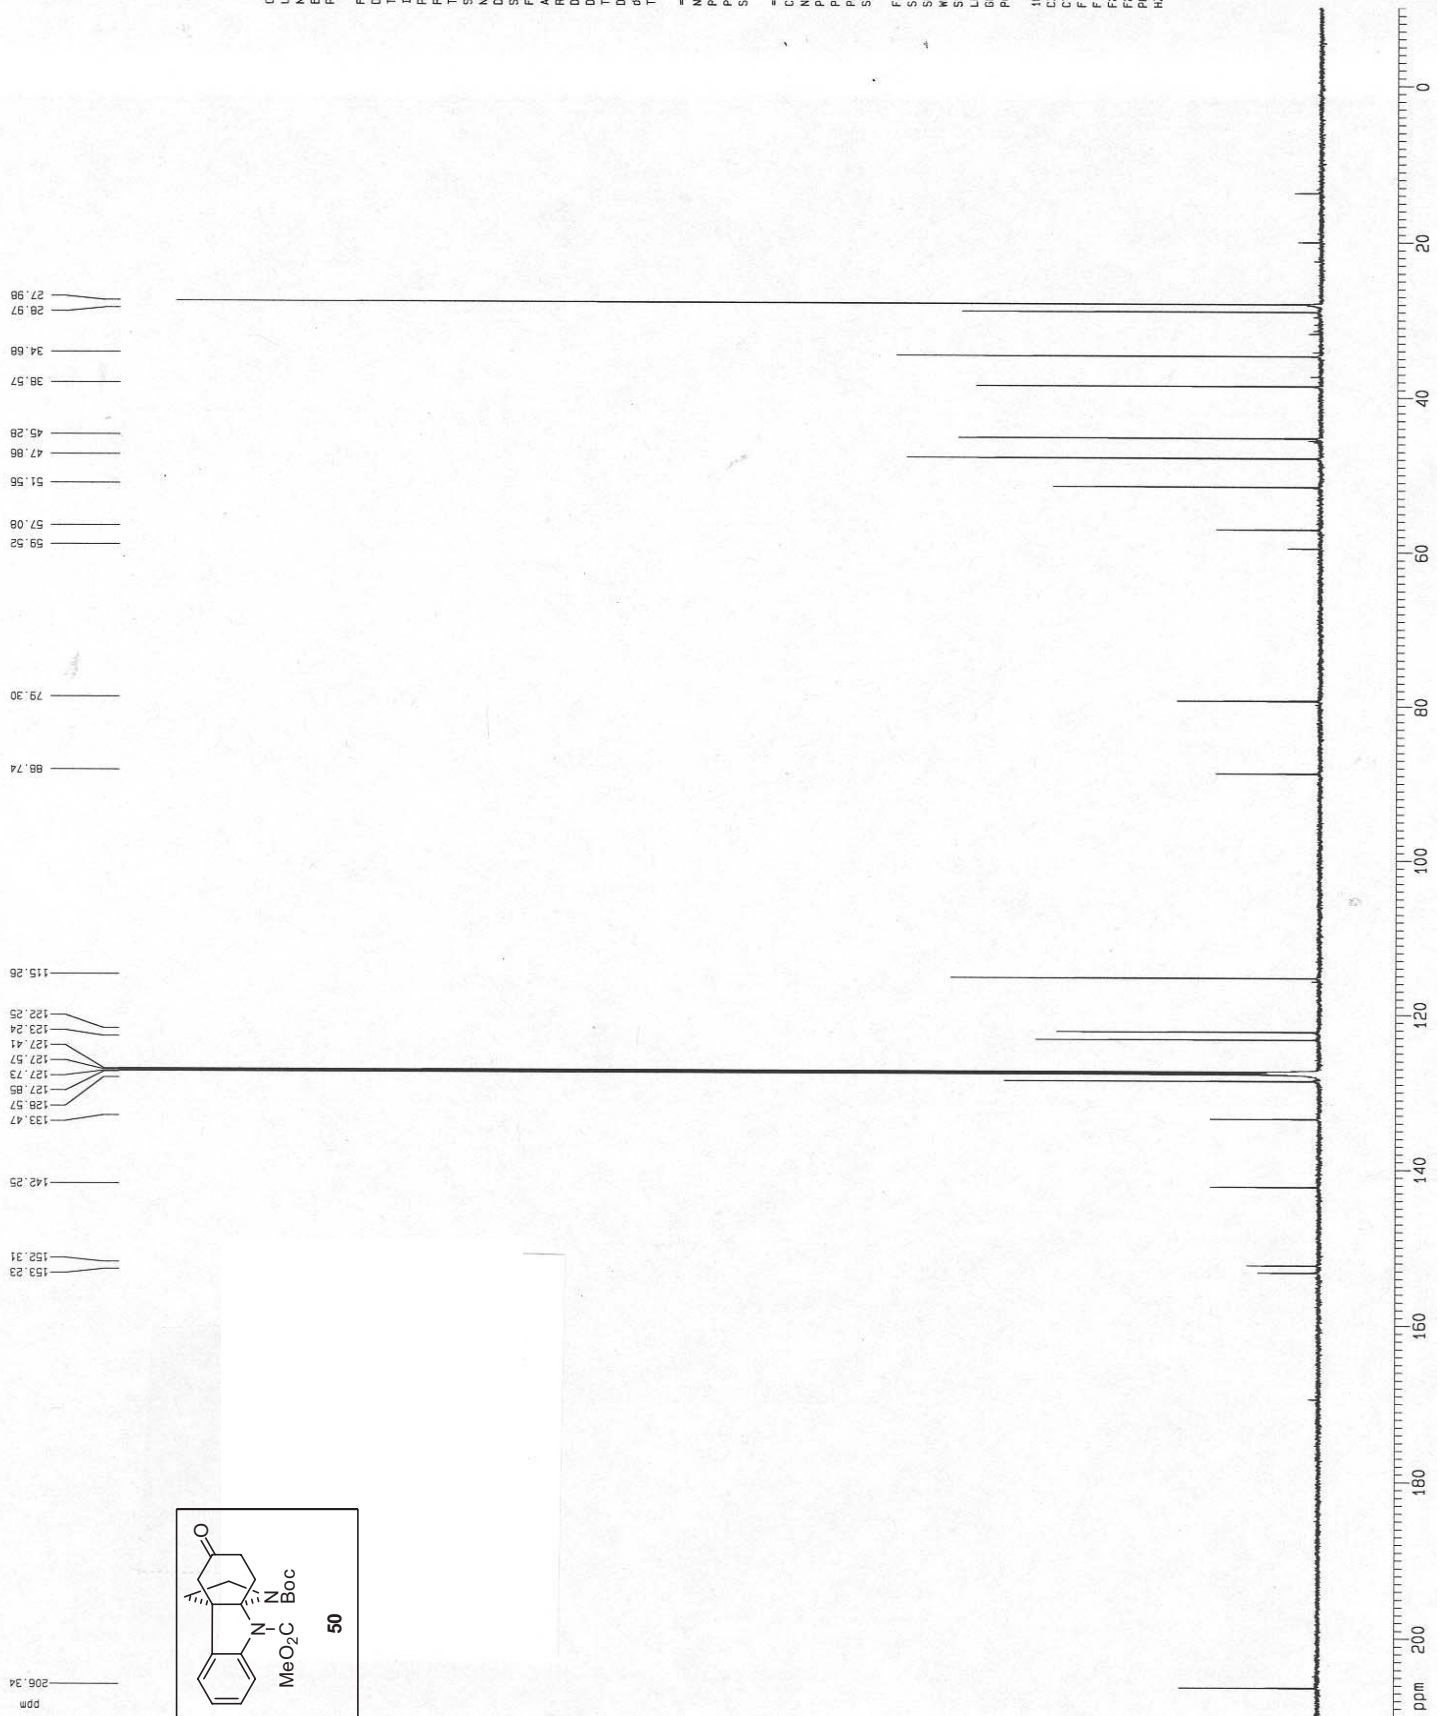



<sup>1</sup>H spectrum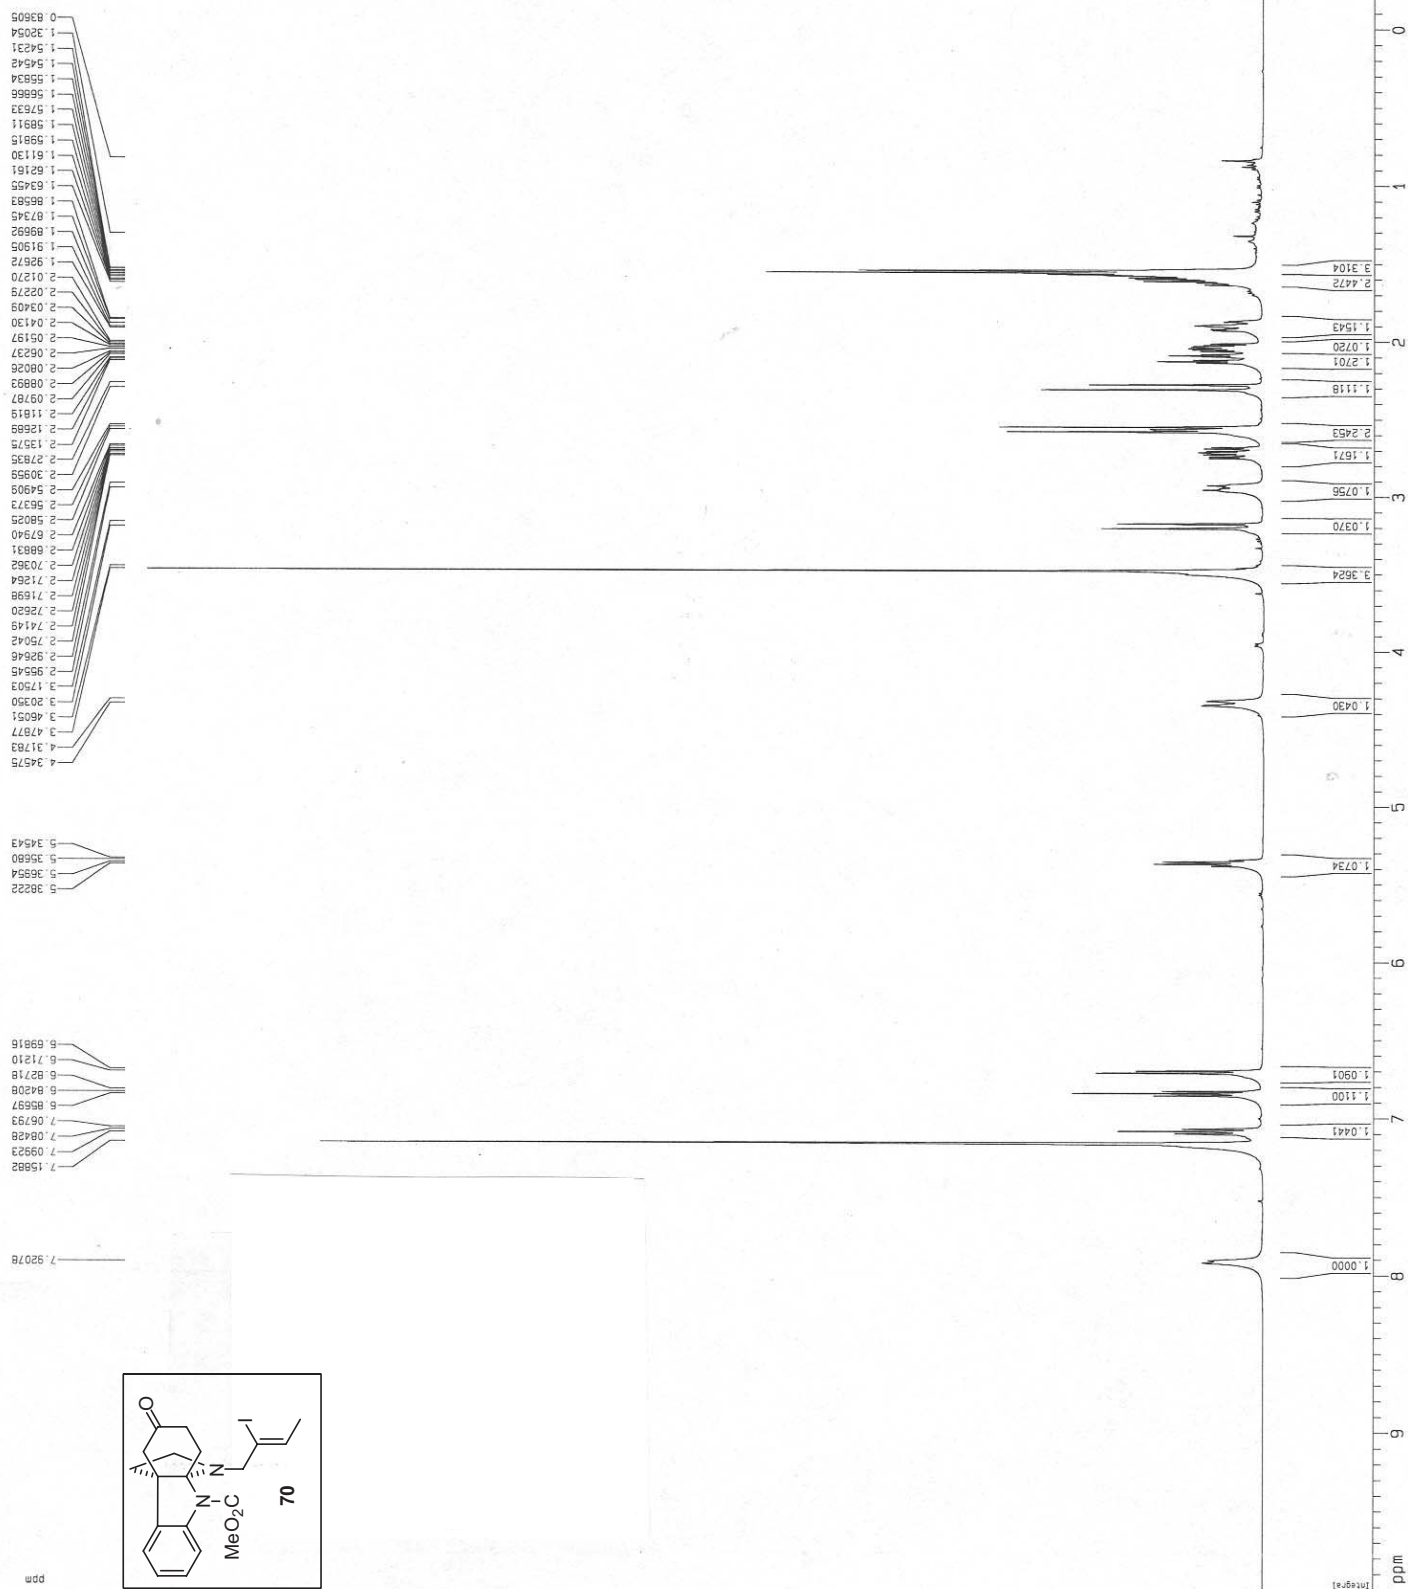

<sup>13</sup>C spectrum with <sup>1</sup>H decoupling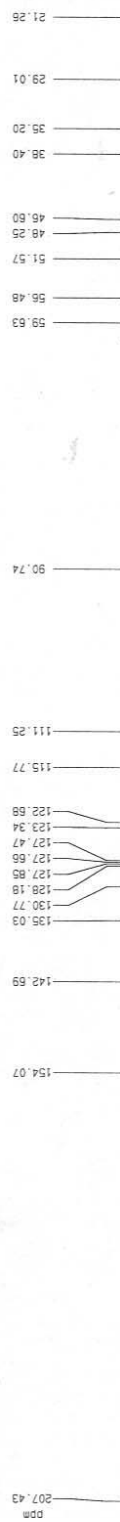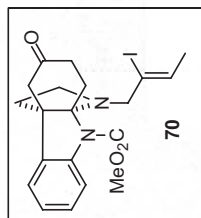

Current Data Parameters  
 USER aaronw  
 NAME adw-111-289  
 EXPNO 300  
 PROCNO 1  
 F2 - Acquisition Parameters  
 Date\_ 2005123  
 Time\_ 15.00  
 INSTRUM cryo500  
 PROBHD 5 mm CPTCI 1H-  
 PULPROG zgpg30  
 TD 65418  
 SOLVENT CDCl3  
 NS 230  
 DS 4  
 SS 30303.031 Hz  
 SMH 0.463222 Hz  
 FIDRES 1.0794635 sec  
 AQ 5792.6  
 RG 16.500 usec  
 DE 6.00 usec  
 TE 323.0 K  
 D1 0.25000000 sec  
 d11 0.03000000 sec  
 MCREST 0.00000000 sec  
 MCWRR 0.01500000 sec  
 ===== CHANNEL f1 =====  
 NUC1 <sup>13</sup>C  
 P1 15.00 usec  
 PL1 0.00 dB  
 SF01 125.7942540 MHz  
 ===== CHANNEL f2 =====  
 CPOPRG2 waltz16  
 NUC2 <sup>1</sup>H  
 P2 100.00 usec  
 PL2 1.60 dB  
 PL12 23.54 dB  
 SF02 500.2225011 MHz  
 F2 - Processing parameters  
 SI 65536  
 SF 125.7804190 MHz  
 WDW EM  
 SSB 0  
 LB 1.00 Hz  
 GB 0  
 PC 2.00  
 1D NMR plot parameters  
 CX 22.80 cm  
 CY 37.86 cm  
 F1 210.000 ppm  
 F2 20413.85 Hz  
 F3 -1257.80 Hz  
 PPM0 9.64912 ppm/cm  
 HZCM 1213.67078 Hz/cm

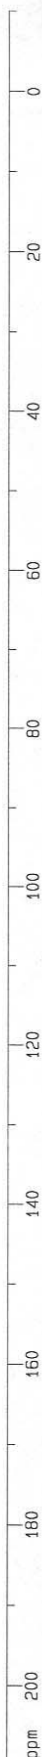

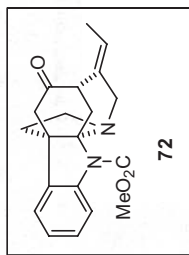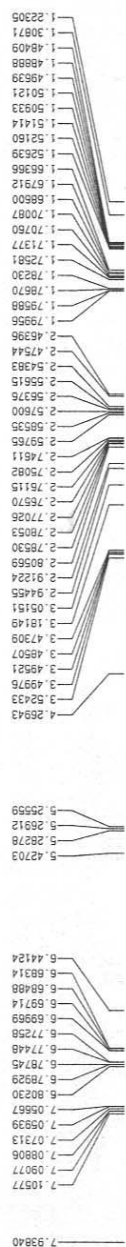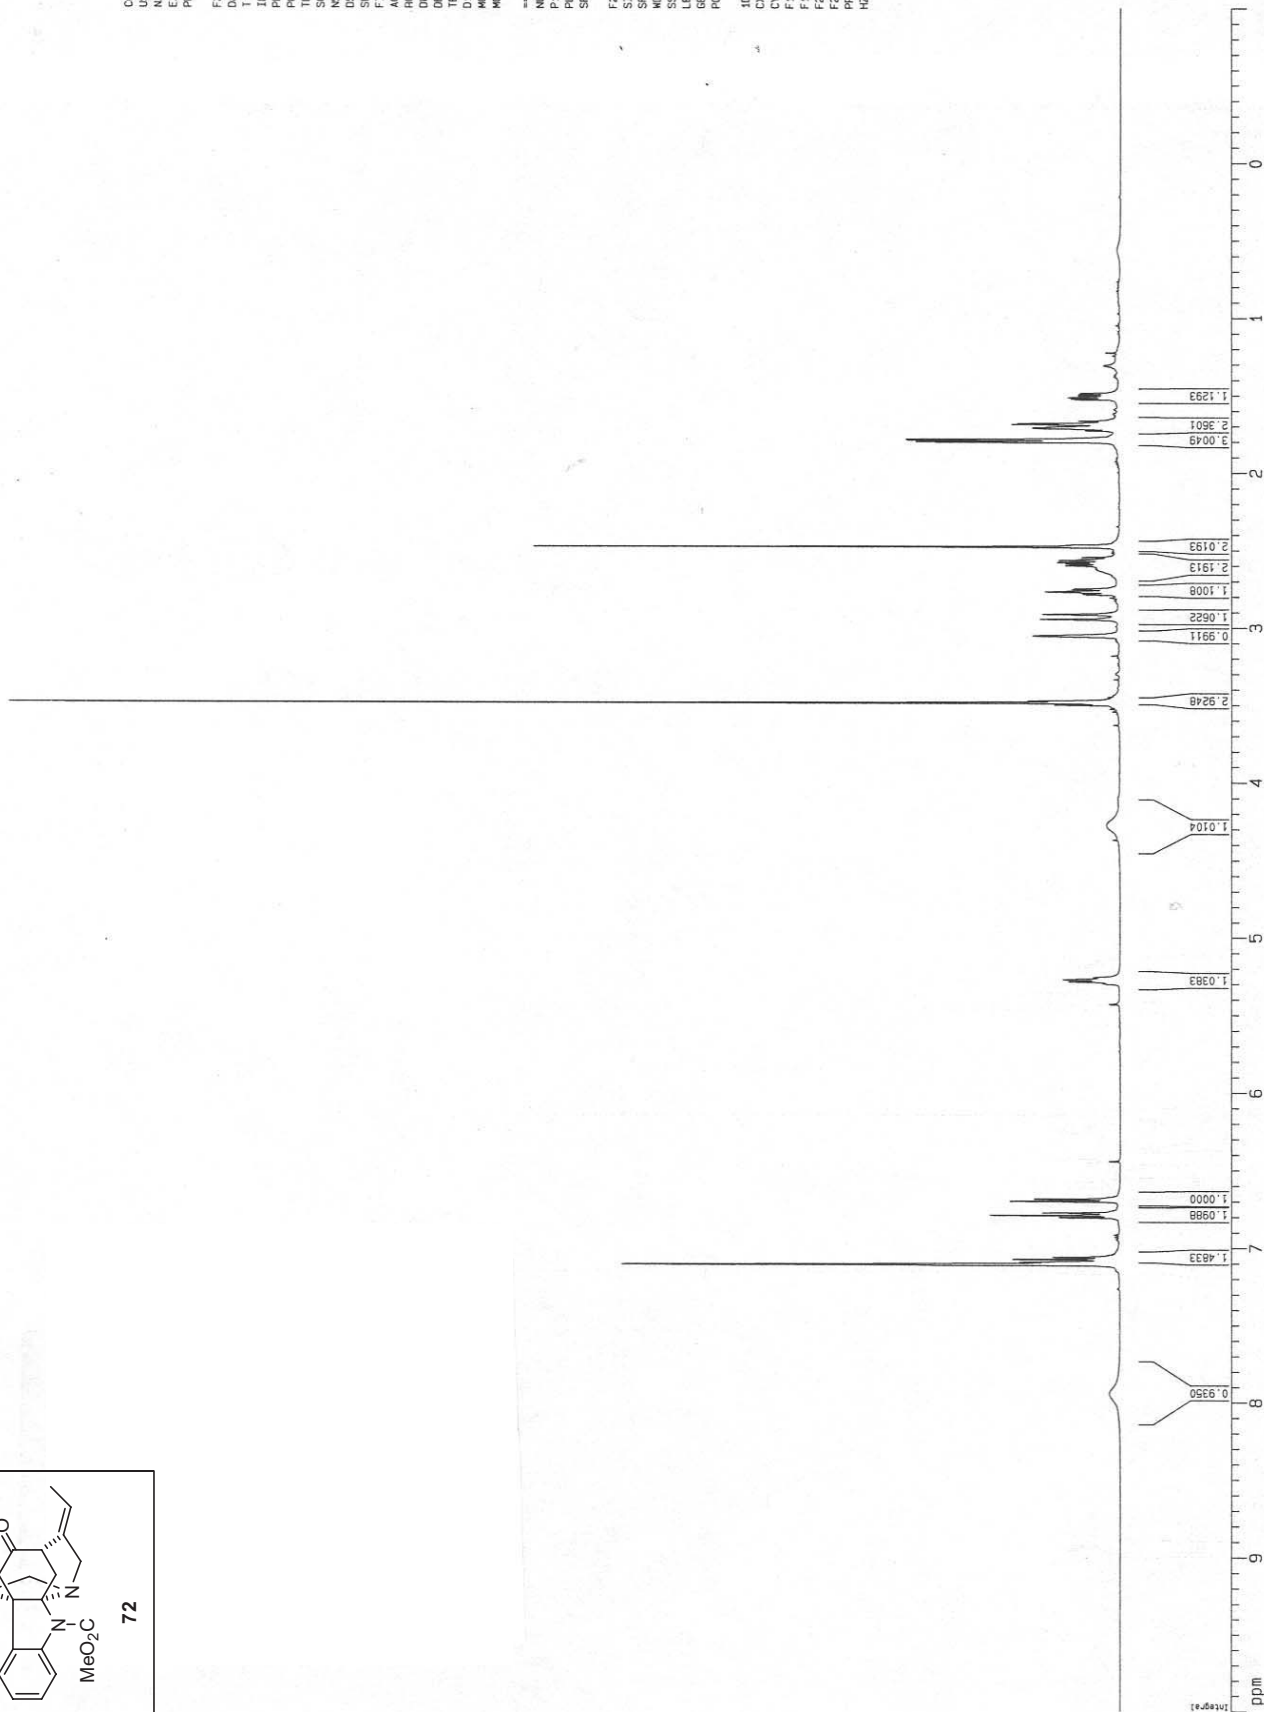

| Current Data Parameters    |                 | F2 - Acquisition Parameters |                |
|----------------------------|-----------------|-----------------------------|----------------|
| USER                       | arcon           | Date                        | 20051219       |
| NAME                       | 304-III-291-2   | Time                        | 9.28           |
| EXPNO                      | 1               | INSTRUM                     | gN500          |
| PROCNO                     | 1               | PROBHD                      | 5 mm broadband |
|                            |                 | PULPROG                     | zg30           |
|                            |                 | TD                          | 8192           |
|                            |                 | CONVENT                     | 6006           |
|                            |                 | SI                          | 8              |
|                            |                 | SWH                         | 8012.820 Hz    |
|                            |                 | FIDRES                      | 0.090043 Hz    |
|                            |                 | AD                          | 5.0390939 sec  |
|                            |                 | RG                          | 143.7          |
|                            |                 | DM                          | 62.400 usec    |
|                            |                 | DE                          | 6.00 usec      |
|                            |                 | TE                          | 333.0 K        |
|                            |                 | D1                          | 0.10000000 sec |
|                            |                 | MCPCMR                      | 0.00000000 sec |
|                            |                 | MCPCMR2                     | 0.01500000 sec |
| ***** CHANNEL f1 *****     |                 |                             |                |
| NUC1                       |                 |                             |                |
| FL1                        | 11.50 usec      |                             |                |
| FL1                        | -3.00 dB        |                             |                |
| F2 - Processing parameters |                 |                             |                |
| RF01                       | 500.043003 MHz  |                             |                |
| SF01                       | 65536           |                             |                |
| SF                         | 500.0400270 MHz |                             |                |
| EN                         | EN              |                             |                |
| ND00                       | 0               |                             |                |
| GB                         | 0.30 Hz         |                             |                |
| LB                         | 0               |                             |                |
| PC                         | 4.00            |                             |                |
| 10 NMR Plot parameters     |                 |                             |                |
| CX                         | 22.00 cm        |                             |                |
| FX                         | 15.00 cm        |                             |                |
| FY                         | 15.00 cm        |                             |                |
| FZ                         | 5000.40 Hz      |                             |                |
| F2                         | -1.000 ppm      |                             |                |
| F2P                        | -500.04 Hz      |                             |                |
| AFNCH                      | 0.48346 ppm/cm  |                             |                |
| AFZCH                      | 241.24739 Hz/cm |                             |                |

<sup>13</sup>C spectrum with <sup>1</sup>H decoupling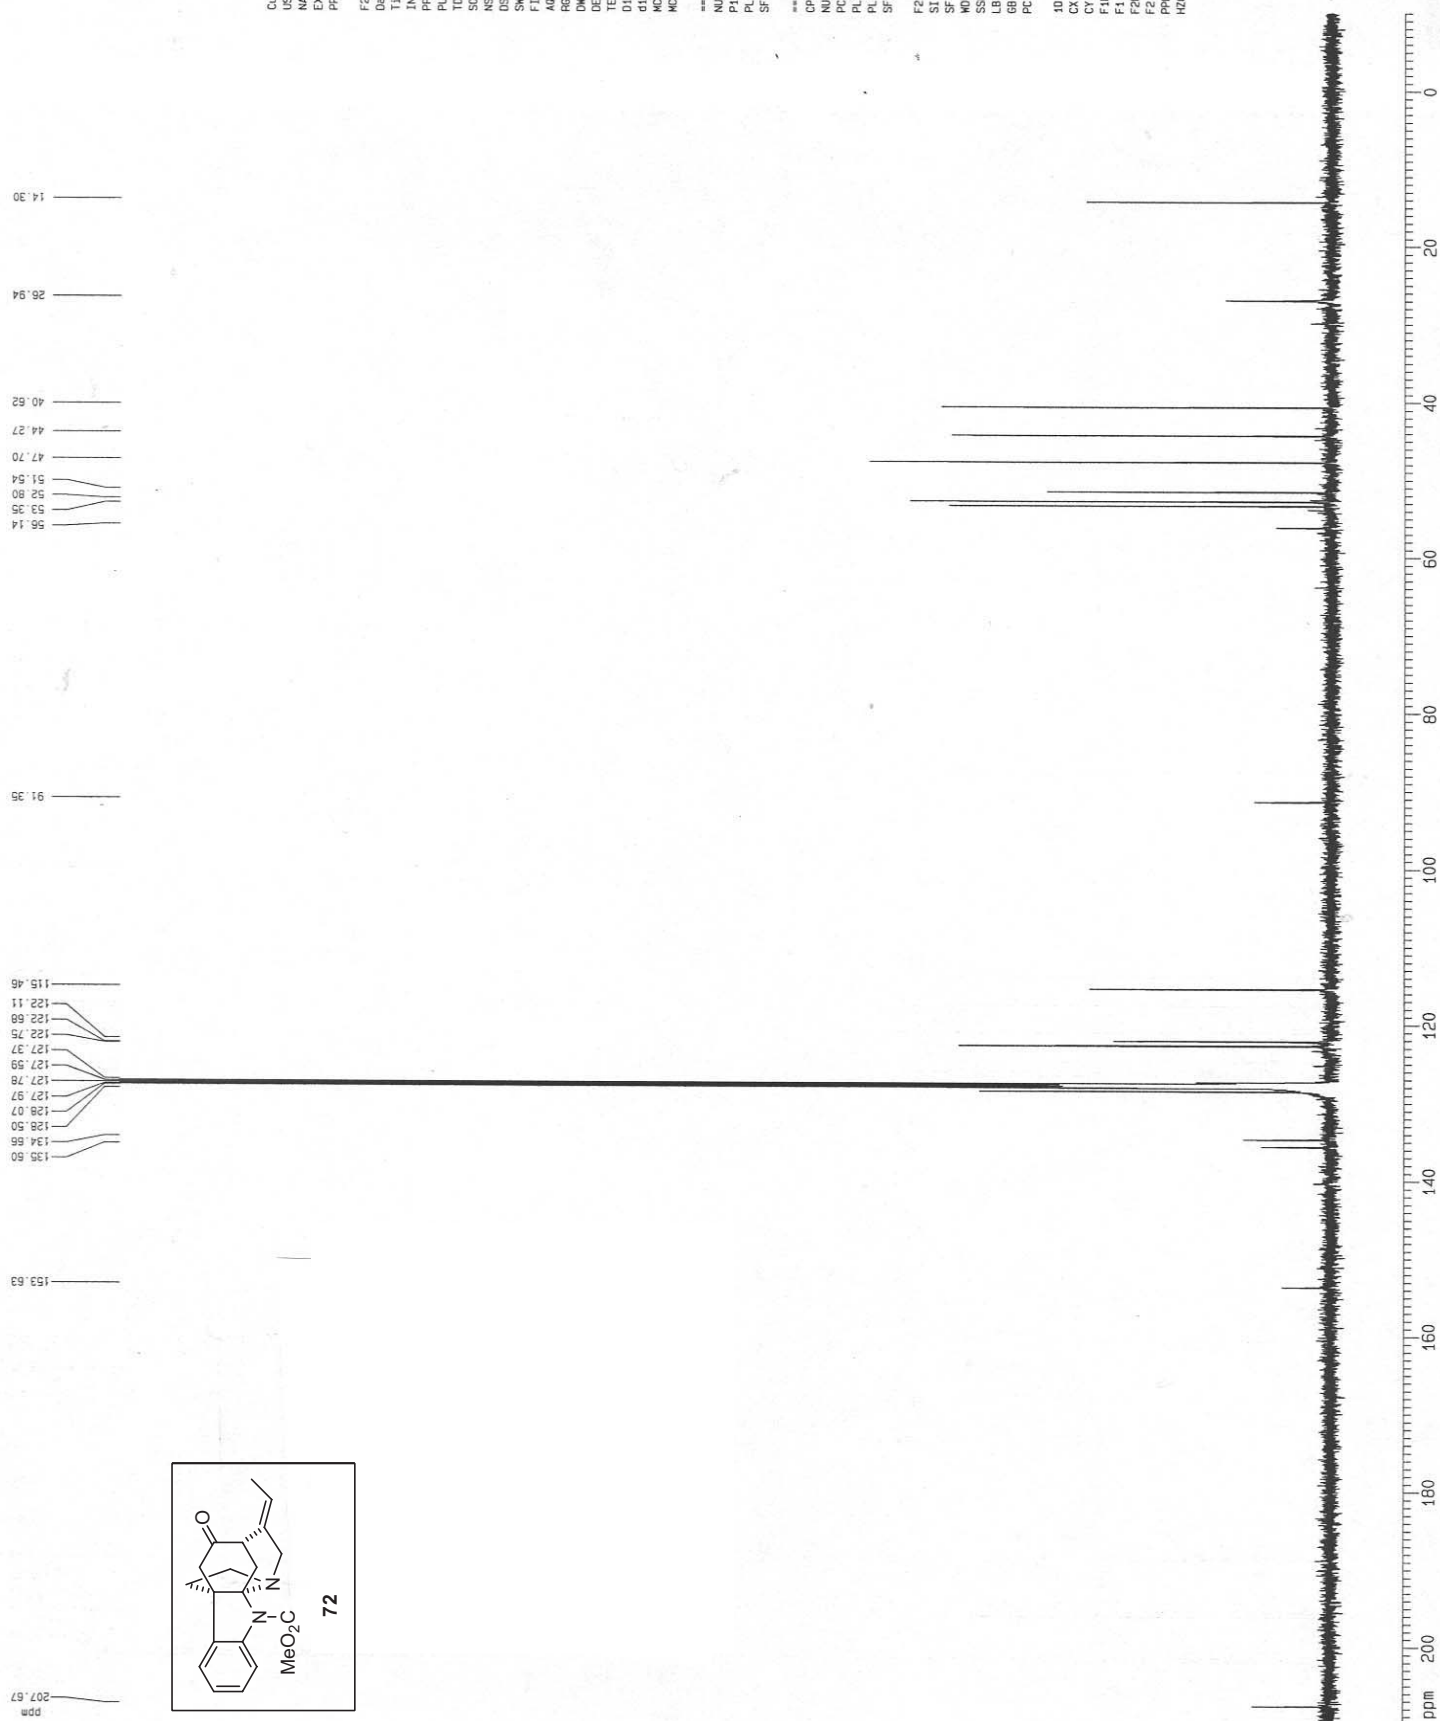

<sup>1</sup>H spectrum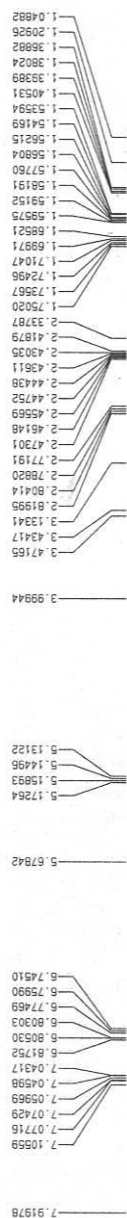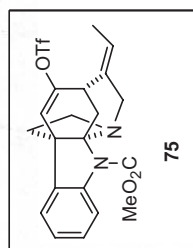

Current Data Parameters  
 USER admin  
 NAME adm-111-282-1  
 EXPNO 1  
 PROCNO 1

F2 - Acquisition Parameters  
 Date\_ 20051226  
 Time 9.05  
 INSTRUM spect  
 PROBHD 5 mm broadband  
 PULPROG zgpg30  
 TO 81728  
 SOLVENT CDCl3  
 NS 8  
 DS 2  
 SWH 6012.620 Hz  
 FIDRES 0.098043 Hz  
 AQ 5.0999398 sec  
 RG 256  
 DE 62.400 usec  
 TE 300.2 K  
 D1 0.10000000 sec  
 MCHEST 0.00000000 sec  
 MCHRG 0.01500000 sec

===== CHANNEL f1 =====  
 NUC1 1H  
 P1 11.50 usec  
 PL1 -3.00 dB  
 SFO1 500.0435003 MHz

F2 - Processing parameters  
 SI 65536  
 SF 500.0400270 MHz  
 EQN 2  
 ASB 0  
 LB 0.30 Hz  
 GB 0  
 PC 4.00

10 NMR plot parameters  
 CX 22.80 cm  
 CY 15.00 cm  
 FIP 10.000 ppm  
 F1 5000.40 Hz  
 F2 -1.000 ppm  
 F2 -500.04 Hz  
 PPMCM 0.48246 ppm/cm  
 HZCM 241.24739 Hz/cm

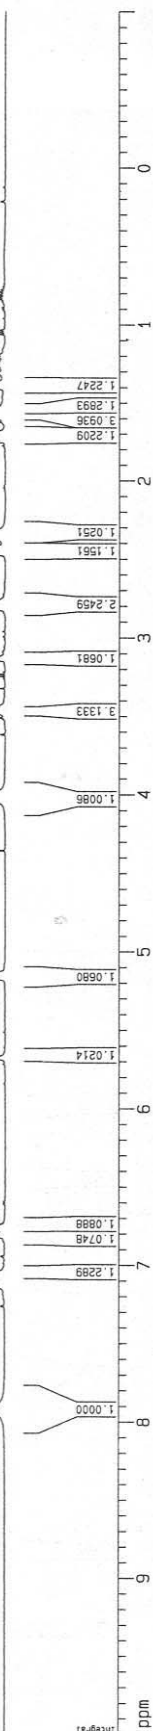



<sup>13</sup>C spectrum with <sup>1</sup>H decoupling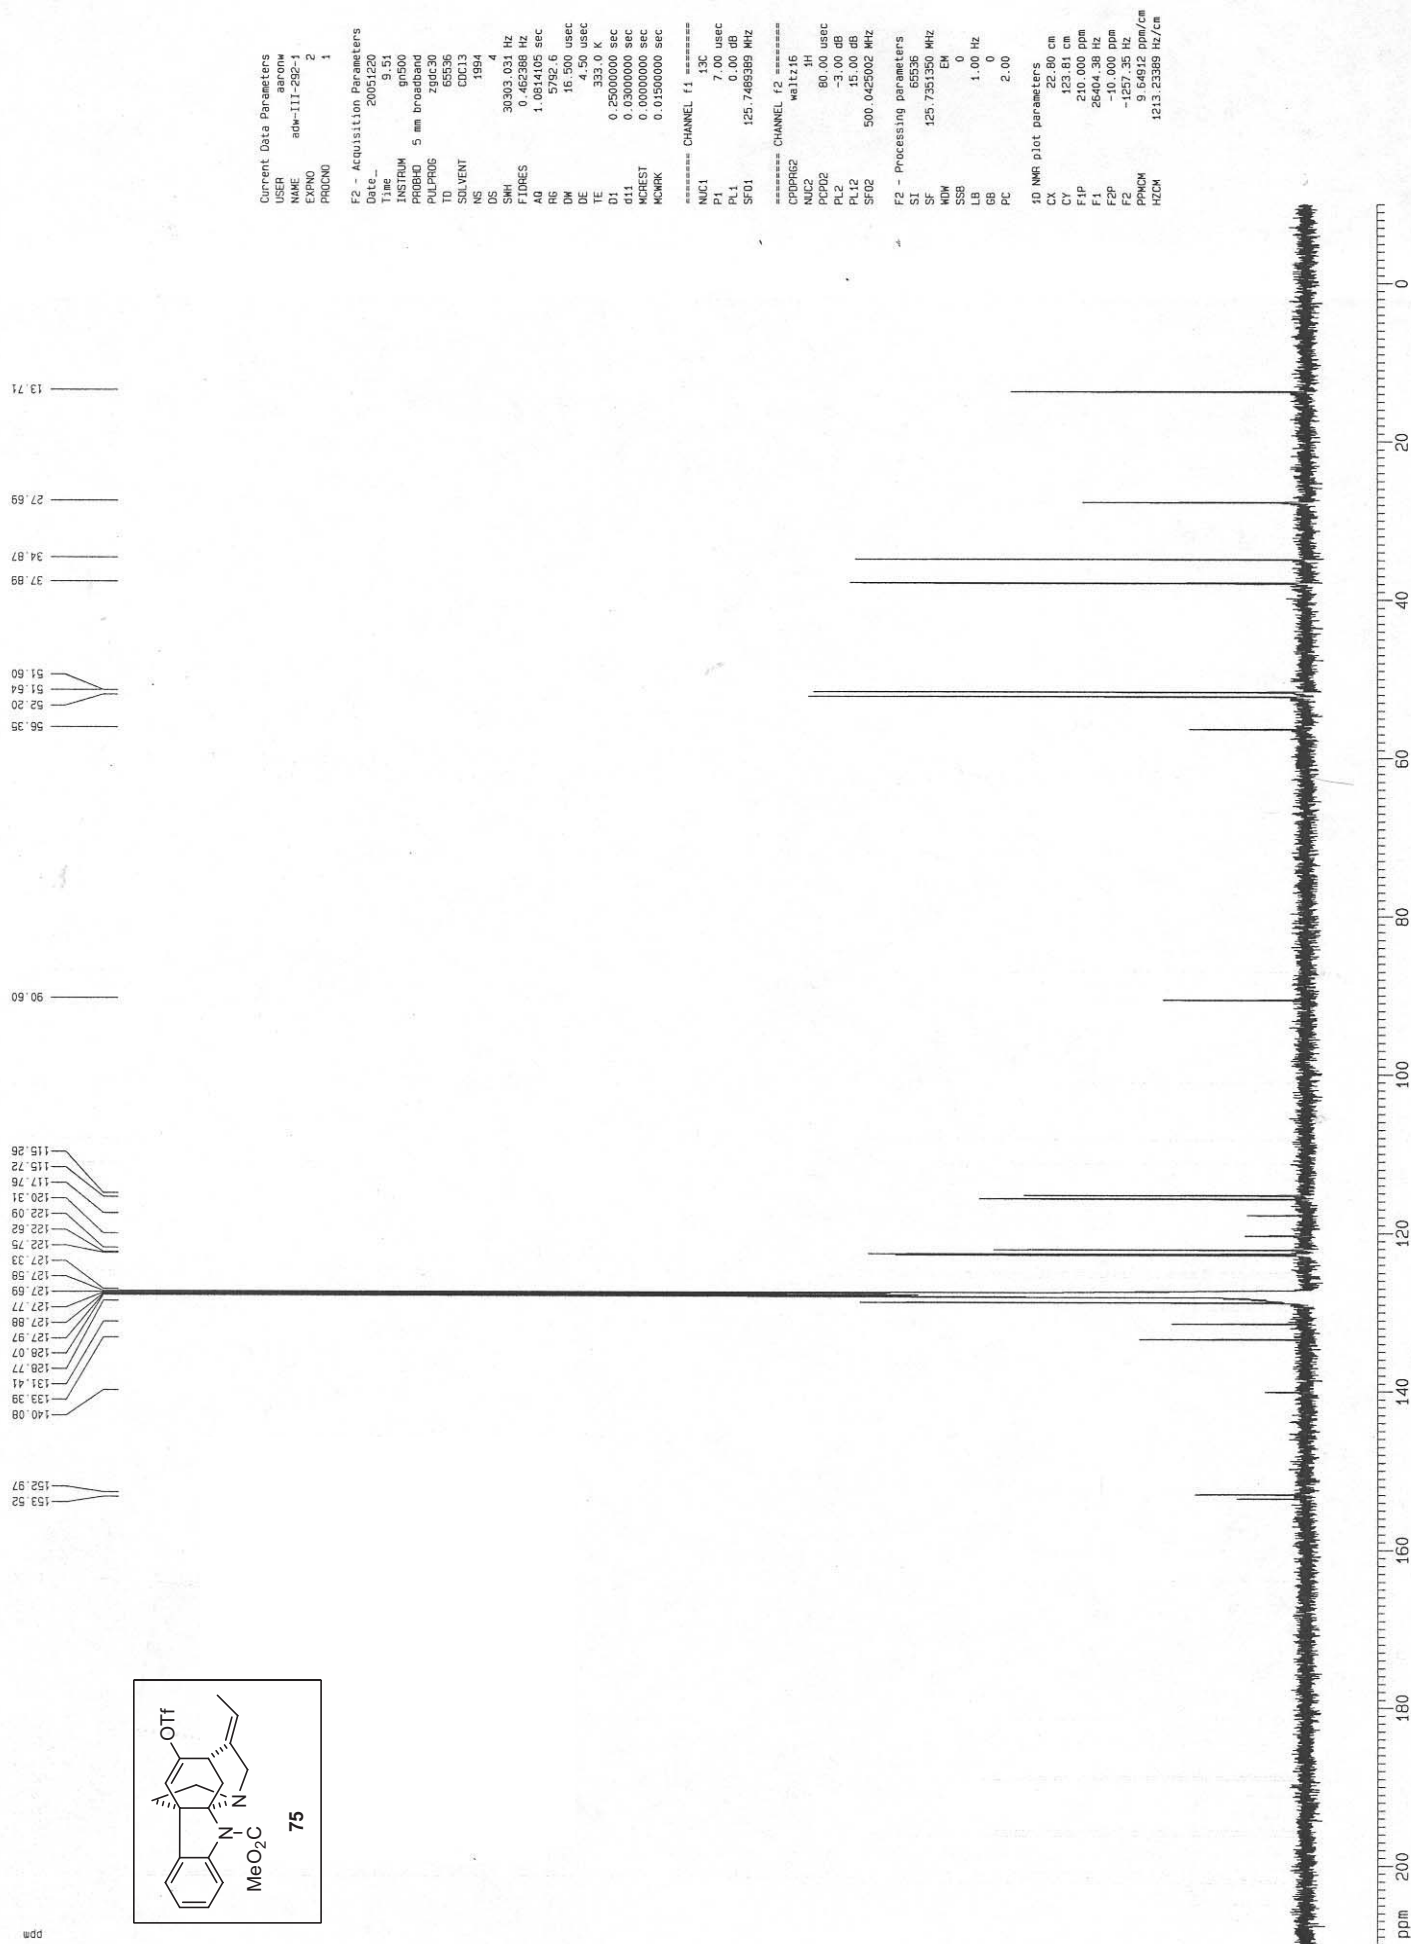

Supplement: Supplementary file 1 [file 4643344]
